# Supplementary material for: BERTPhylo: An Efffcient Method to Accelerate Phylogenetic Inference Using a Pretrained DNA Language Model
Source: Research Square preprint supplement (doi:10.21203/rs.3.rs-4611601/v1), 2024-07-15
Supplement: Supplementary file 1 [file 78c1bfed75dfafe59793c96f.xlsx]

## Sheet: ALL
class	order	family	genus	#seq	ID/OOD
(1521260, 'Lycopodiopsida')	(13836, 'Isoetales')	(13837, 'Isoetaceae')	(13838, 'Isoetes')	100	OOD			Number of categories per rank
(3296, 'Cycadopsida')	(3297, 'Cycadales')	(3394, 'Cycadaceae')	(3395, 'Cycas')	100	OOD				phylum	class	order	family	genus
		(3298, 'Zamiaceae')	(3299, 'Encephalartos')	100	OOD			ID	1	5	34	65	100
(113508, 'Sphagnopsida')	(13802, 'Sphagnales')	(13803, 'Sphagnaceae')	(13804, 'Sphagnum')	1086	ID			OOD	0	2	5	18	50
(186771, 'Jungermanniopsida')	(186798, 'Porellales')	(400721, 'Frullaniaceae')	(95763, 'Frullania')	1385	ID
		(56912, 'Porellaceae')	(56942, 'Porella')	100	OOD
		(65055, 'Lejeuneaceae')	(65056, 'Lejeunea')	100	OOD
	(3199, 'Jungermanniales')	(53016, 'Plagiochilaceae')	(53018, 'Plagiochila')	100	OOD			Data Set		#seqs
(241806, 'Polypodiopsida')	(3268, 'Polypodiales')	(13819, 'Pteridaceae')	(13817, 'Adiantum')	855	ID			Train		137742
		(41972, 'Aspleniaceae')	(32071, 'Asplenium')	1800	ID			Validation	5000	5000
		(29607, 'Dryopteridaceae')	(41965, 'Arachniodes')	100	OOD			Test	ID	10000
	(693763, 'Cyatheales')	(29635, 'Cyatheaceae')	(13470, 'Cyathea')	100	OOD				OOD	5000
(58019, 'Pinopsida')	(1446379, 'Cupressales')	(3367, 'Cupressaceae')	(13100, 'Juniperus')	707	ID
		(25623, 'Taxaceae')	(25628, 'Taxus')	100	OOD
	(1446380, 'Pinales')	(3318, 'Pinaceae')	(3337, 'Pinus')	1027	ID
(3398, 'Magnoliopsida')	(16360, 'Alismatales')	(16362, 'Potamogetonaceae')	(13228, 'Potamogeton')	1065	ID
		(26319, 'Hydrocharitaceae')	(13165, 'Najas')	692	ID
	(16736, 'Piperales')	(16739, 'Piperaceae')	(13215, 'Piper')	1455	ID
	(3502, 'Fagales')	(3503, 'Fagaceae')	(3511, 'Quercus')	3806	ID
	(3524, 'Caryophyllales')	(1804623, 'Chenopodiaceae')	(3550, 'Atriplex')	807	ID
			(46108, 'Suaeda')	100	OOD
		(3568, 'Caryophyllaceae')	(3573, 'Silene')	2214	ID
		(3593, 'Cactaceae')	(106975, 'Opuntia')	940	ID
		(3615, 'Polygonaceae')	(61508, 'Persicaria')	804	ID
			(3620, 'Rheum')	100	OOD
		(4437, 'Plumbaginaceae')	(46093, 'Limonium')	692	ID
	(3646, 'Malpighiales')	(233880, 'Phyllanthaceae')	(58880, 'Phyllanthus')	1051	ID
		(24921, 'Violaceae')	(13757, 'Viola')	789	ID
		(3683, 'Passifloraceae')	(3684, 'Passiflora')	1339	ID
		(3688, 'Salicaceae')	(40685, 'Salix')	938	ID
		(3977, 'Euphorbiaceae')	(3990, 'Euphorbia')	3749	ID
			(100370, 'Croton')	1829	ID
		(629714, 'Hypericaceae')	(55962, 'Hypericum')	100	OOD
	(3699, 'Brassicales')	(3700, 'Brassicaceae')	(87301, 'Draba')	911	ID
			(50460, 'Cardamine')	842	ID
			(3701, 'Arabidopsis')	1390	ID
			(76872, 'Boechera')	648	ID
	(3744, 'Rosales')	(3487, 'Moraceae')	(3493, 'Ficus')	2924	ID
			(3488, 'Artocarpus')	633	ID
		(3745, 'Rosaceae')	(3754, 'Prunus')	2662	ID
			(23216, 'Rubus')	2063	ID
			(3764, 'Rosa')	1368	ID
			(23204, 'Potentilla')	1005	ID
			(23224, 'Spiraea')	100	OOD
		(25996, 'Elaeagnaceae')	(48233, 'Hippophae')	100	OOD
		(3499, 'Urticaceae')	(3500, 'Urtica')	100	OOD
	(38820, 'Poales')	(4479, 'Poaceae')	(4605, 'Festuca')	1301	ID
			(4544, 'Poa')	1237	ID
			(15492, 'Elymus')	1107	ID
			(52713, 'Leymus')	905	ID
			(4512, 'Hordeum')	4365	ID
			(4501, 'Bromus')	721	ID
			(15376, 'Calamagrostis')	100	OOD
			(4527, 'Oryza')	100	OOD
		(4609, 'Cyperaceae')	(13398, 'Carex')	7388	ID
			(4610, 'Cyperus')	100	OOD
	(4036, 'Apiales')	(4037, 'Apiaceae')	(46366, 'Bupleurum')	1217	ID
			(40917, 'Heracleum')	100	OOD
	(403667, 'Vitales')	(3602, 'Vitaceae')	(149371, 'Tetrastigma')	993	ID
	(40548, 'Dioscoreales')	(4671, 'Dioscoreaceae')	(4672, 'Dioscorea')	1639	ID
	(4055, 'Gentianales')	(21472, 'Gentianaceae')	(21496, 'Gentiana')	1599	ID
		(24966, 'Rubiaceae')	(25443, 'Psychotria')	890	ID
			(13442, 'Coffea')	100	OOD
			(25168, 'Galium')	100	OOD
	(4069, 'Solanales')	(4070, 'Solanaceae')	(4107, 'Solanum')	2915	ID
			(24646, 'Lycium')	100	OOD
		(4118, 'Convolvulaceae')	(4128, 'Cuscuta')	1496	ID
			(4119, 'Ipomoea')	1993	ID
			(4122, 'Convolvulus')	100	OOD
	(4143, 'Lamiales')	(156152, 'Plantaginaceae')	(4173, 'Veronica')	1556	ID
			(26867, 'Plantago')	998	ID
		(26122, 'Gesneriaceae')	(48772, 'Primulina')	2273	ID
			(48768, 'Cyrtandra')	100	OOD
			(26254, 'Streptocarpus')	100	OOD
		(4136, 'Lamiaceae')	(21880, 'Salvia')	3192	ID
		(4196, 'Lentibulariaceae')	(13747, 'Utricularia')	712	ID
		(4144, 'Oleaceae')	(38871, 'Fraxinus')	100	OOD
		(4149, 'Scrophulariaceae')	(39249, 'Scrophularia')	100	OOD
		(91896, 'Orobanchaceae')	(36747, 'Orobanche')	100	OOD
			(43174, 'Pedicularis')	2401	ID
	(41768, 'Ranunculales')	(3440, 'Ranunculaceae')	(3445, 'Ranunculus')	1797	ID
			(3441, 'Coptis')	716	ID
			(22868, 'Anemone')	100	OOD
			(3452, 'Clematis')	100	OOD
			(49188, 'Aconitum')	100	OOD
	(41937, 'Sapindales')	(23513, 'Rutaceae')	(67937, 'Zanthoxylum')	810	ID
			(2706, 'Citrus')	928	ID
		(23672, 'Sapindaceae')	(4022, 'Acer')	2542	ID
	(41943, 'Geraniales')	(4027, 'Geraniaceae')	(4030, 'Pelargonium')	100	OOD
	(41944, 'Myrtales')	(3931, 'Myrtaceae')	(3932, 'Eucalyptus')	1619	ID
			(178174, 'Syzygium')	919	ID
	(41945, 'Ericales')	(19955, 'Ebenaceae')	(13492, 'Diospyros')	995	ID
		(25692, 'Balsaminaceae')	(35939, 'Impatiens')	1902	ID
		(27065, 'Theaceae')	(4441, 'Camellia')	1750	ID
		(4335, 'Primulaceae')	(49647, 'Primula')	2070	ID
			(59977, 'Lysimachia')	1073	ID
		(4345, 'Ericaceae')	(13509, 'Erica')	2159	ID
			(4346, 'Rhododendron')	2007	ID
			(13538, 'Gaultheria')	100	OOD
			(13749, 'Vaccinium')	100	OOD
	(41946, 'Saxifragales')	(3781, 'Crassulaceae')	(202994, 'Rhodiola')	1024	ID
			(3784, 'Sedum')	100	OOD
		(3792, 'Saxifragaceae')	(3798, 'Saxifraga')	1762	ID
		(24945, 'Haloragaceae')	(24952, 'Myriophyllum')	100	OOD
	(41947, 'Santalales')	(1003247, 'Thesiaceae')	(50166, 'Thesium')	890	ID
	(4199, 'Dipsacales')	(4200, 'Caprifoliaceae')	(49606, 'Lonicera')	837	ID
			(19952, 'Valeriana')	100	OOD
		(4206, 'Adoxaceae')	(4204, 'Viburnum')	1149	ID
	(4209, 'Asterales')	(16472, 'Goodeniaceae')	(49599, 'Goodenia')	630	ID
		(4210, 'Asteraceae')	(18794, 'Senecio')	1263	ID
			(4219, 'Artemisia')	1309	ID
			(41629, 'Saussurea')	845	ID
			(41503, 'Centaurea')	100	OOD
			(41549, 'Cirsium')	100	OOD
		(4381, 'Campanulaceae')	(40568, 'Campanula')	1817	ID
	(4618, 'Zingiberales')	(4637, 'Musaceae')	(4640, 'Musa')	1174	ID
		(4642, 'Zingiberaceae')	(99568, 'Curcuma')	798	ID
	(4667, 'Liliales')	(4677, 'Liliaceae')	(4688, 'Lilium')	1055	ID
			(59070, 'Fritillaria')	100	OOD
		(4703, 'Smilacaceae')	(49656, 'Smilax')	860	ID
	(71239, 'Cucurbitales')	(3650, 'Cucurbitaceae')	(3655, 'Cucumis')	766	ID
		(3680, 'Begoniaceae')	(3681, 'Begonia')	100	OOD
	(71243, 'Oxalidales')	(4033, 'Oxalidaceae')	(4034, 'Oxalis')	1405	ID
	(72025, 'Fabales')	(3803, 'Fabaceae')	(3808, 'Acacia')	6135	ID
			(20400, 'Astragalus')	1575	ID
			(3853, 'Lathyrus')	1037	ID
			(3904, 'Vicia')	911	ID
			(3898, 'Trifolium')	1297	ID
			(3828, 'Crotalaria')	750	ID
			(162809, 'Inga')	762	ID
			(53862, 'Dalbergia')	745	ID
			(3913, 'Vigna')	1357	ID
			(3881, 'Onobrychis')	683	ID
			(3867, 'Lotus')	100	OOD
			(3883, 'Phaseolus')	100	OOD
			(20802, 'Oxytropis')	100	OOD
			(47034, 'Hedysarum')	100	OOD
			(53853, 'Chamaecrista')	100	OOD
			(53892, 'Lespedeza')	100	OOD
		(4274, 'Polygalaceae')	(4275, 'Polygala')	100	OOD
	(73496, 'Asparagales')	(26339, 'Iridaceae')	(26378, 'Iris')	970	ID
		(4668, 'Amaryllidaceae')	(4678, 'Allium')	3136	ID
		(4747, 'Orchidaceae')	(37818, 'Dendrobium')	3439	ID
			(38192, 'Maxillaria')	2078	ID
			(38208, 'Bulbophyllum')	1184	ID
			(53064, 'Paphiopedilum')	915	ID
			(38214, 'Spiranthes')	674	ID
			(38204, 'Habenaria')	100	OOD
			(38220, 'Coelogyne')	100	OOD
	(91883, 'Aquifoliales')	(4294, 'Aquifoliaceae')	(4295, 'Ilex')	1849	ID

## Sheet: class
phylum	class	ID/OOD
Streptophyta	Lycopodiopsida	OOD
Streptophyta	Cycadopsida	OOD
Streptophyta	Sphagnopsida	ID
Streptophyta	Jungermanniopsida	ID
Streptophyta	Polypodiopsida	ID
Streptophyta	Pinopsida	ID
Streptophyta	Magnoliopsida	ID

## Sheet: order
class	order	ID/OOD
Lycopodiopsida	Isoetales	OOD
Cycadopsida	Cycadales	OOD
Sphagnopsida	Sphagnales	ID
Jungermanniopsida	Porellales	ID
Jungermanniopsida	Jungermanniales	OOD
Polypodiopsida	Polypodiales	ID
Polypodiopsida	Cyatheales	OOD
Pinopsida	Cupressales	ID
Pinopsida	Pinales	ID
Magnoliopsida	Alismatales	ID
Magnoliopsida	Piperales	ID
Magnoliopsida	Fagales	ID
Magnoliopsida	Caryophyllales	ID
Magnoliopsida	Malpighiales	ID
Magnoliopsida	Brassicales	ID
Magnoliopsida	Rosales	ID
Magnoliopsida	Poales	ID
Magnoliopsida	Apiales	ID
Magnoliopsida	Vitales	ID
Magnoliopsida	Dioscoreales	ID
Magnoliopsida	Gentianales	ID
Magnoliopsida	Solanales	ID
Magnoliopsida	Lamiales	ID
Magnoliopsida	Ranunculales	ID
Magnoliopsida	Sapindales	ID
Magnoliopsida	Geraniales	OOD
Magnoliopsida	Myrtales	ID
Magnoliopsida	Ericales	ID
Magnoliopsida	Saxifragales	ID
Magnoliopsida	Santalales	ID
Magnoliopsida	Dipsacales	ID
Magnoliopsida	Asterales	ID
Magnoliopsida	Zingiberales	ID
Magnoliopsida	Liliales	ID
Magnoliopsida	Cucurbitales	ID
Magnoliopsida	Oxalidales	ID
Magnoliopsida	Fabales	ID
Magnoliopsida	Asparagales	ID
Magnoliopsida	Aquifoliales	ID

## Sheet: family
order	family	ID/OOD
Isoetales	Isoetaceae	OOD
Cycadales	Cycadaceae	OOD
Cycadales	Zamiaceae	OOD
Sphagnales	Sphagnaceae	ID
Porellales	Frullaniaceae	ID
Porellales	Porellaceae	OOD
Porellales	Lejeuneaceae	OOD
Jungermanniales	Plagiochilaceae	OOD
Polypodiales	Pteridaceae	ID
Polypodiales	Aspleniaceae	ID
Polypodiales	Dryopteridaceae	OOD
Cyatheales	Cyatheaceae	OOD
Cupressales	Cupressaceae	ID
Cupressales	Taxaceae	OOD
Pinales	Pinaceae	ID
Alismatales	Potamogetonaceae	ID
Alismatales	Hydrocharitaceae	ID
Piperales	Piperaceae	ID
Fagales	Fagaceae	ID
Caryophyllales	Chenopodiaceae	ID
Caryophyllales	Caryophyllaceae	ID
Caryophyllales	Cactaceae	ID
Caryophyllales	Polygonaceae	ID
Caryophyllales	Plumbaginaceae	ID
Malpighiales	Phyllanthaceae	ID
Malpighiales	Violaceae	ID
Malpighiales	Passifloraceae	ID
Malpighiales	Salicaceae	ID
Malpighiales	Euphorbiaceae	ID
Malpighiales	Hypericaceae	OOD
Brassicales	Brassicaceae	ID
Rosales	Moraceae	ID
Rosales	Rosaceae	ID
Rosales	Elaeagnaceae	OOD
Rosales	Urticaceae	OOD
Poales	Poaceae	ID
Poales	Cyperaceae	ID
Apiales	Apiaceae	ID
Vitales	Vitaceae	ID
Dioscoreales	Dioscoreaceae	ID
Gentianales	Gentianaceae	ID
Gentianales	Rubiaceae	ID
Solanales	Solanaceae	ID
Solanales	Convolvulaceae	ID
Lamiales	Plantaginaceae	ID
Lamiales	Gesneriaceae	ID
Lamiales	Lamiaceae	ID
Lamiales	Lentibulariaceae	ID
Lamiales	Oleaceae	OOD
Lamiales	Scrophulariaceae	OOD
Lamiales	Orobanchaceae	OOD
Lamiales	Orobanchaceae	ID
Ranunculales	Ranunculaceae	ID
Sapindales	Rutaceae	ID
Sapindales	Sapindaceae	ID
Geraniales	Geraniaceae	OOD
Myrtales	Myrtaceae	ID
Ericales	Ebenaceae	ID
Ericales	Balsaminaceae	ID
Ericales	Theaceae	ID
Ericales	Primulaceae	ID
Ericales	Ericaceae	ID
Saxifragales	Crassulaceae	ID
Saxifragales	Saxifragaceae	ID
Saxifragales	Haloragaceae	OOD
Santalales	Thesiaceae	ID
Dipsacales	Caprifoliaceae	ID
Dipsacales	Adoxaceae	ID
Asterales	Goodeniaceae	ID
Asterales	Asteraceae	ID
Asterales	Campanulaceae	ID
Zingiberales	Musaceae	ID
Zingiberales	Zingiberaceae	ID
Liliales	Liliaceae	ID
Liliales	Smilacaceae	ID
Cucurbitales	Cucurbitaceae	ID
Cucurbitales	Begoniaceae	OOD
Oxalidales	Oxalidaceae	ID
Fabales	Fabaceae	ID
Fabales	Polygalaceae	OOD
Asparagales	Iridaceae	ID
Asparagales	Amaryllidaceae	ID
Asparagales	Orchidaceae	ID
Aquifoliales	Aquifoliaceae	ID

## Sheet: genus
family	genus	ID/OOD
Isoetaceae	Isoetes	OOD
Cycadaceae	Cycas	OOD
Zamiaceae	Encephalartos	OOD
Sphagnaceae	Sphagnum	ID
Frullaniaceae	Frullania	ID
Porellaceae	Porella	OOD
Lejeuneaceae	Lejeunea	OOD
Plagiochilaceae	Plagiochila	OOD
Pteridaceae	Adiantum	ID
Aspleniaceae	Asplenium	ID
Dryopteridaceae	Arachniodes	OOD
Cyatheaceae	Cyathea	OOD
Cupressaceae	Juniperus	ID
Taxaceae	Taxus	OOD
Pinaceae	Pinus	ID
Potamogetonaceae	Potamogeton	ID
Hydrocharitaceae	Najas	ID
Piperaceae	Piper	ID
Fagaceae	Quercus	ID
Chenopodiaceae	Atriplex	ID
Chenopodiaceae	Suaeda	OOD
Caryophyllaceae	Silene	ID
Cactaceae	Opuntia	ID
Polygonaceae	Persicaria	ID
Polygonaceae	Rheum	OOD
Plumbaginaceae	Limonium	ID
Phyllanthaceae	Phyllanthus	ID
Violaceae	Viola	ID
Passifloraceae	Passiflora	ID
Salicaceae	Salix	ID
Euphorbiaceae	Euphorbia	ID
Euphorbiaceae	Croton	ID
Hypericaceae	Hypericum	OOD
Brassicaceae	Draba	ID
Brassicaceae	Cardamine	ID
Brassicaceae	Arabidopsis	ID
Brassicaceae	Boechera	ID
Moraceae	Ficus	ID
Moraceae	Artocarpus	ID
Rosaceae	Prunus	ID
Rosaceae	Rubus	ID
Rosaceae	Rosa	ID
Rosaceae	Potentilla	ID
Rosaceae	Spiraea	OOD
Elaeagnaceae	Hippophae	OOD
Urticaceae	Urtica	OOD
Poaceae	Festuca	ID
Poaceae	Poa	ID
Poaceae	Elymus	ID
Poaceae	Leymus	ID
Poaceae	Hordeum	ID
Poaceae	Bromus	ID
Poaceae	Calamagrostis	OOD
Poaceae	Oryza	OOD
Cyperaceae	Carex	ID
Cyperaceae	Cyperus	OOD
Apiaceae	Bupleurum	ID
Apiaceae	Heracleum	OOD
Vitaceae	Tetrastigma	ID
Dioscoreaceae	Dioscorea	ID
Gentianaceae	Gentiana	ID
Rubiaceae	Psychotria	ID
Rubiaceae	Coffea	OOD
Rubiaceae	Galium	OOD
Solanaceae	Solanum	ID
Solanaceae	Lycium	OOD
Convolvulaceae	Cuscuta	ID
Convolvulaceae	Ipomoea	ID
Convolvulaceae	Convolvulus	OOD
Plantaginaceae	Veronica	ID
Plantaginaceae	Plantago	ID
Gesneriaceae	Primulina	ID
Gesneriaceae	Cyrtandra	OOD
Gesneriaceae	Streptocarpus	OOD
Lamiaceae	Salvia	ID
Lentibulariaceae	Utricularia	ID
Oleaceae	Fraxinus	OOD
Scrophulariaceae	Scrophularia	OOD
Orobanchaceae	Orobanche	OOD
Orobanchaceae	Pedicularis	ID
Ranunculaceae	Ranunculus	ID
Ranunculaceae	Coptis	ID
Ranunculaceae	Anemone	OOD
Ranunculaceae	Clematis	OOD
Ranunculaceae	Aconitum	OOD
Rutaceae	Zanthoxylum	ID
Rutaceae	Citrus	ID
Sapindaceae	Acer	ID
Geraniaceae	Pelargonium	OOD
Myrtaceae	Eucalyptus	ID
Myrtaceae	Syzygium	ID
Ebenaceae	Diospyros	ID
Balsaminaceae	Impatiens	ID
Theaceae	Camellia	ID
Primulaceae	Primula	ID
Primulaceae	Lysimachia	ID
Ericaceae	Erica	ID
Ericaceae	Rhododendron	ID
Ericaceae	Gaultheria	OOD
Ericaceae	Vaccinium	OOD
Crassulaceae	Rhodiola	ID
Crassulaceae	Sedum	OOD
Saxifragaceae	Saxifraga	ID
Haloragaceae	Myriophyllum	OOD
Thesiaceae	Thesium	ID
Caprifoliaceae	Lonicera	ID
Caprifoliaceae	Valeriana	OOD
Adoxaceae	Viburnum	ID
Goodeniaceae	Goodenia	ID
Asteraceae	Senecio	ID
Asteraceae	Artemisia	ID
Asteraceae	Saussurea	ID
Asteraceae	Centaurea	OOD
Asteraceae	Cirsium	OOD
Campanulaceae	Campanula	ID
Musaceae	Musa	ID
Zingiberaceae	Curcuma	ID
Liliaceae	Lilium	ID
Liliaceae	Fritillaria	OOD
Smilacaceae	Smilax	ID
Cucurbitaceae	Cucumis	ID
Begoniaceae	Begonia	OOD
Oxalidaceae	Oxalis	ID
Fabaceae	Acacia	ID
Fabaceae	Astragalus	ID
Fabaceae	Lathyrus	ID
Fabaceae	Vicia	ID
Fabaceae	Trifolium	ID
Fabaceae	Crotalaria	ID
Fabaceae	Inga	ID
Fabaceae	Dalbergia	ID
Fabaceae	Vigna	ID
Fabaceae	Onobrychis	ID
Fabaceae	Lotus	OOD
Fabaceae	Phaseolus	OOD
Fabaceae	Oxytropis	OOD
Fabaceae	Hedysarum	OOD
Fabaceae	Chamaecrista	OOD
Fabaceae	Lespedeza	OOD
Polygalaceae	Polygala	OOD
Iridaceae	Iris	ID
Amaryllidaceae	Allium	ID
Orchidaceae	Dendrobium	ID
Orchidaceae	Maxillaria	ID
Orchidaceae	Bulbophyllum	ID
Orchidaceae	Paphiopedilum	ID
Orchidaceae	Spiranthes	ID
Orchidaceae	Habenaria	OOD
Orchidaceae	Coelogyne	OOD
Aquifoliaceae	Ilex	ID
