# Supplementary material for: BERTPhylo: An Efffcient Method to Accelerate Phylogenetic Inference Using a Pretrained DNA Language Model
Source: Research Square preprint supplement (doi:10.21203/rs.3.rs-4611601/v1), 2024-07-15
Supplement: Supplementary file 2 [file 98901c4d540d6a23c4fe411a.xlsx]

## Sheet: Figure 3
pipeline	seqs	length	time
BERTPhylo	57	full-length	360
BERTPhylo	92	full-length	1140
BERTPhylo	129	full-length	1560
BERTPhylo	152	full-length	2280
BERTPhylo	57	high-attention	240
BERTPhylo	92	high-attention	660
BERTPhylo	129	high-attention	780
BERTPhylo	152	high-attention	960
standard	677	full-length	72360

## Sheet: Figure 4a
methods	AUROC (%)				AUPR (%)
	class	order	family	genus	class	order	family	genus
BERTPhylo	98.2748	89.1184	88.993	90.0437	99.9644	99.5066	98.3786	93.8029
DNABERT	85.3386	65.2819	73.7527	82.4304	99.5762	97.856	95.6015	90.8104

## Sheet: Figure 4b
BERTPhylo-class				BERTPhylo-order				BERTPhylo-family				BERTPhylo-genus					DNABERT-class				DNABERT-order				DNABERT-family				DNABERT-genus
index	label	score		index	label	score		index	label	score		index	label	score			index	label	score		index	label	score		index	label	score		index	label	score
0	1	0.9999999999999997		0	1	0.872596		0	1	0.9866171685755799		0	1	0.7642804580852853			0	1	0.9966172187629835		0	1	0.202915		0	1	0.1627455406068809		0	1	0.33044781124998607
1	1	1		1	1	0.9999999999992658		1	1	0.9999999291997482		1	1	0.9999997605841283			1	1	0.9951656590440994		1	1	0.798019		1	1	0.9395471628882186		1	1	0.9707585207885814
2	1	1		2	1	0.9999999900496979		2	1	0.9999999962825389		2	1	0.9999999638662809			2	1	0.9993020781781718		2	1	0.792915		2	1	0.9835161530271637		2	1	0.9977454718193278
3	1	1		3	1	0.9999999980220087		3	1	0.9999999998884798		3	1	0.9999998557634062			3	1	0.9998489494141681		3	1	0.708471		3	1	0.9237622757807169		3	1	0.9762025504041512
4	1	1		4	1	0.9999999447987077		4	1	1		4	1	0.9999997077699394			4	1	0.9999995983793406		4	1	0.929577		4	1	0.9995847151865718		4	1	0.9985524545922636
5	1	0.9999999999999909		5	1	0.9999988211976909		5	1	0.9999995213619735		5	1	0.9999975991445759			5	1	0.999994		5	1	0.861366		5	1	0.9976532707734448		5	1	0.9969215100339249
6	1	0.9999999999999951		6	1	0.9999999640368501		6	1	0.9999999861289958		6	1	0.9999887292643279			6	1	0.9999721365795354		6	1	0.780972		6	1	0.9978405284282149		6	1	0.9996843161306863
7	1	0.9999999999999941		7	1	1		7	1	1		7	1	0.9999999910940823			7	1	1		7	1	0.978895		7	1	0.9999807268126816		7	1	0.9993052433194015
8	1	1		8	1	0.9999999989842294		8	1	0.9999997474833381		8	1	0.9999999064678741			8	1	0.9999999779936197		8	1	0.942573		8	1	0.9986010267841282		8	1	0.9996214959641547
9	1	1		9	1	0.9999999958239133		9	1	0.9999999801069015		9	1	0.9999998697921204			9	1	0.9827262819722933		9	1	0.215274		9	1	0.7470152417386244		9	1	0.9897755177977648
10	1	1		10	1	0.9999999999596711		10	1	0.9999999998345672		10	1	0.9999999659212763			10	1	0.9999103753111309		10	1	0.912036		10	1	0.9998331231051286		10	1	0.9943896892757532
11	1	1		11	1	0.9999999759132394		11	1	0.9999997190161324		11	1	0.9999997400359991			11	1	0.9971865014881299		11	1	0.200289		11	1	0.2556739247998546		11	1	0.8293130881475855
12	1	0.9999999999995663		12	1	1		12	1	0.9999999960683797		12	1	1			12	1	0.5660075053151878		12	1	0.244824		12	1	0.0900167		12	1	0.3180416286264141
13	1	0.9999999999902152		13	1	0.9999999998786864		13	1	0.9999999540893907		13	1	1			13	1	0.9887549330792756		13	1	0.941581		13	1	0.9986211894665769		13	1	0.9997091147488799
14	1	1		14	1	0.9999999776916414		14	1	0.9999992391151384		14	1	0.9999996236128412			14	1	0.9544136491507937		14	1	0.858657		14	1	0.9945996497381336		14	1	0.9995367981887048
15	1	0.9999999999997699		15	1	0.9999999955500258		15	1	1		15	1	0.9999994935254904			15	1	0.9842907991967367		15	1	0.918262		15	1	0.9947667465712405		15	1	0.9983352879700425
16	1	1		16	1	0.9999999999657034		16	1	0.9999999998363017		16	1	0.9999999632331766			16	1	0.9999064565858534		16	1	0.912903		16	1	0.9998269386238252		16	1	0.9945391150603463
17	1	1		17	1	0.999996		17	1	1		17	1	0.9999876518069398			17	1	0.99764		17	1	0.541841		17	1	0.9434481416085326		17	1	0.995759
18	1	1		18	1	0.9994644128913185		18	1	0.9999999691356359		18	1	0.9999770132477808			18	1	0.9999988433586715		18	1	0.862638		18	1	0.9987549947957399		18	1	0.9992999934912894
19	1	1		19	1	0.9999994408787508		19	1	1		19	1	0.9999930827069606			19	1	0.9999999918407204		19	1	0.94073		19	1	0.9997877941388147		19	1	0.9857583288326098
20	1	1		20	1	0.9999998731775995		20	1	1		20	1	0.9999998692642575			20	1	0.9984624906750842		20	1	0.463027		20	1	0.9761295799405113		20	1	0.9950988398556191
21	1	1		21	1	0.9999986285430968		21	1	0.9999999882296665		21	1	0.9999998106483488			21	1	0.9999782883119843		21	1	0.976399		21	1	0.9931718345771966		21	1	0.9980147977271778
22	1	1		22	1	0.9999999502601399		22	1	0.9999999995244749		22	1	0.9999989195960368			22	1	0.9965221151518621		22	1	0.791795		22	1	0.9881146676742618		22	1	0.9987361575317103
23	1	1		23	1	0.9999991713832517		23	1	0.9999906259246729		23	1	0.9999966896943921			23	1	0.9982977008627931		23	1	0.158194		23	1	0.19520796951521902		23	1	0.032331289402361005
24	1	1		24	1	0.9999978917213858		24	1	0.9999999950051843		24	1	0.9999996441781016			24	1	0.9999768584224697		24	1	0.940637		24	1	0.9968768363518011		24	1	0.9985511541170284
25	1	0.9999999999999997		25	1	0.9999999975604769		25	1	0.9999994777092582		25	1	0.999999			25	1	0.9999560478395731		25	1	0.86286		25	1	0.9994913079484633		25	1	0.998559
26	1	1		26	1	0.9999999719501964		26	1	0.9999999964463151		26	1	0.9999999897437536			26	1	0.9999285660988618		26	1	0.955645		26	1	0.9977892760110385		26	1	0.9975821695725527
27	1	1		27	1	0.9999999999528352		27	1	0.9999999844425347		27	1	0.9999277187661926			27	1	0.9999384308086047		27	1	0.953657		27	1	0.9973469654600173		27	1	0.999571
28	1	1		28	1	0.9999999999999976		28	1	0.9999999947224851		28	1	1			28	1	0.9999999993815122		28	1	0.982485		28	1	0.9999456915324733		28	1	0.9969883042291507
29	1	1		29	1	0.9999999122563491		29	1	0.9999999841873567		29	1	0.9999999383222459			29	1	1		29	1	0.613663		29	1	0.9967829907419072		29	1	0.9991760566643441
30	1	1		30	1	0.9999999997824712		30	1	0.9999997619104994		30	1	0.9999939022853829			30	1	0.9999998449286611		30	1	0.862811		30	1	0.9979128425954348		30	1	0.9966789200976724
31	1	1		31	1	0.9999999999884432		31	1	0.9999999991176769		31	1	0.9999995754111836			31	1	0.9999985363948569		31	1	0.846367		31	1	0.9993753888324536		31	1	0.9990393745870255
32	1	1		32	1	0.9999999999924709		32	1	0.9999999994221193		32	1	0.9999998349425437			32	1	0.9999997575087145		32	1	0.959559		32	1	0.999463		32	1	0.9996287855941698
33	1	1		33	1	0.9999998684835257		33	1	0.9999997843473906		33	1	0.9999993820156319			33	1	0.9999999520045074		33	1	0.605792		33	1	0.9976815119349156		33	1	0.9992940136796227
34	1	1		34	1	0.9999999999999998		34	1	0.9999999996124576		34	1	1			34	1	0.9999999329379106		34	1	0.994669		34	1	0.999887		34	1	0.9994307490918855
35	1	1		35	1	0.9999999999768993		35	1	0.9999999691103566		35	1	1			35	1	0.9999997059553746		35	1	0.380746		35	1	0.31678142979929386		35	1	0.5369888007822007
36	1	1		36	1	0.9999999980681243		36	1	0.9999999950999096		36	1	0.9999998915739229			36	1	0.9999999831868477		36	1	0.695634		36	1	0.9958003380326518		36	1	0.9963162790997465
37	1	1		37	1	0.9999999295782055		37	1	0.9999999289659246		37	1	0.9999999042417983			37	1	0.9999999209912475		37	1	0.648764		37	1	0.9982832317863459		37	1	0.999258
38	1	1		38	1	1		38	1	0.9999999972969346		38	1	0.9999999604797197			38	1	0.9999999777217131		38	1	0.954704		38	1	0.9991946369636571		38	1	0.9974663255680961
39	1	1		39	1	0.9999999999999989		39	1	1		39	1	0.9999999393368881			39	1	0.999999		39	1	0.746962		39	1	0.9970691749621575		39	1	0.9996045944959884
40	1	1		40	1	0.9999999999999932		40	1	0.9999999642104264		40	1	1			40	1	0.9999999905152249		40	1	0.981665		40	1	0.9985764551743898		40	1	0.9979320588135666
41	1	1		41	1	1		41	1	0.9999999634533239		41	1	0.9999999063774182			41	1	1		41	1	0.681223		41	1	0.9295964958337958		41	1	0.9783876489959761
42	1	1		42	1	0.9999999999999992		42	1	0.9999999994898867		42	1	0.9999997538742901			42	1	0.9999887227587079		42	1	0.965586		42	1	0.9970345374344526		42	1	0.9994246071927786
43	1	1		43	1	0.9999999998198564		43	1	0.9999999596403683		43	1	0.9999950741837718			43	1	0.9999815117670919		43	1	0.899665		43	1	0.9978479708908587		43	1	0.9991836142660969
44	1	1		44	1	1		44	1	0.9999999998380267		44	1	0.9999993319756435			44	1	1		44	1	0.741214		44	1	0.9822386089964336		44	1	0.9936172405201711
45	1	1		45	1	0.9999999999989062		45	1	0.9999999963853159		45	1	0.9999999776411541			45	1	0.9999938911150966		45	1	0.918599		45	1	0.9977232663630085		45	1	0.9997191832585133
46	1	1		46	1	0.9999999999999978		46	1	0.9999999994405062		46	1	0.9999999422737236			46	1	0.9999999793978613		46	1	0.976811		46	1	0.998572		46	1	0.998083
47	1	1		47	1	0.9999999999969765		47	1	0.9999999952290616		47	1	0.9999998314094647			47	1	1		47	1	0.251925		47	1	0.8257080292594814		47	1	0.9850634950503661
48	1	1		48	1	0.9999999999999959		48	1	0.9999999994289518		48	1	0.9999996471606581			48	1	0.9999991954679394		48	1	0.953761		48	1	0.9991832041410954		48	1	0.9989471221403808
49	1	1		49	1	0.9999999999999882		49	1	0.9999999657793996		49	1	0.9999998279924117			49	1	0.9999999756977386		49	1	0.983143		49	1	0.9991102705249043		49	1	0.9972618394233409
50	1	1		50	1	0.9999999999938187		50	1	0.9999999985697041		50	1	0.9999975290523854			50	1	0.9979719057633112		50	1	0.902336		50	1	0.9998701766287307		50	1	0.9991451192666825
51	1	1		51	1	0.9999999999637414		51	1	0.9999999978529065		51	1	0.9999999777007952			51	1	0.9999999650550159		51	1	0.746941		51	1	0.9943748708079772		51	1	0.9958982408217111
52	1	1		52	1	1		52	1	0.9999999999995838		52	1	0.9999999999871618			52	1	0.9999702589247751		52	1	0.9978		52	1	0.9997028463180703		52	1	0.9994019437843153
53	1	1		53	1	0.9999999999950907		53	1	0.9999999896608975		53	1	1			53	1	0.9979469832374981		53	1	0.958483		53	1	0.9970278534175322		53	1	0.9970913401521422
54	1	1		54	1	1		54	1	0.9999999590718693		54	1	0.9999999177591794			54	1	0.9963206480891773		54	1	0.944505		54	1	0.9886233741953738		54	1	0.9957
55	1	1		55	1	0.9999999997342208		55	1	0.9999999996272554		55	1	1			55	1	0.9972005219532886		55	1	0.984263		55	1	0.999679		55	1	0.999445
56	1	1		56	1	0.9999999999995892		56	1	0.9999999916328272		56	1	0.9999999967185915			56	1	0.9989467333876154		56	1	0.942542		56	1	0.8572058335487702		56	1	0.9255484424607556
57	1	1		57	1	1		57	1	0.9999999999945116		57	1	0.9999999997071275			57	1	0.9999813513220854		57	1	0.681178		57	1	0.9994640194129751		57	1	0.9997055403013234
58	1	1		58	1	0.9999999999999706		58	1	0.9999999999959942		58	1	0.9999999841214298			58	1	0.9852392250071507		58	1	0.986762		58	1	0.9995681270501249		58	1	0.9990643992119701
59	1	1		59	1	0.9999986900534361		59	1	0.9999862058789025		59	1	0.999623			59	1	0.5109146112962355		59	1	0.3231		59	1	0.2921678030495504		59	1	0.8211083707473245
60	1	1		60	1	0.9999999999999994		60	1	0.9999999999964096		60	1	0.9999999999739716			60	1	0.9937915291017728		60	1	0.98557		60	1	0.9943518777363846		60	1	0.9845849902852938
61	1	1		61	1	1		61	1	0.9999999999918893		61	1	0.9999999972847443			61	1	0.9996253326887043		61	1	0.999802		61	1	0.9987885797485199		61	1	0.9994334714493027
62	1	1		62	1	1		62	1	0.9999999999977626		62	1	0.9999999990637488			62	1	0.9999123777828864		62	1	0.981133		62	1	0.9999370455156195		62	1	0.9998312333459852
63	1	1		63	1	1		63	1	0.9999999962460924		63	1	0.9999999883993484			63	1	0.9998385475009663		63	1	0.749925		63	1	0.99126		63	1	0.99466
64	1	0.9999999999999909		64	1	0.9999999999997105		64	1	0.9999999612792482		64	1	0.9999963229472877			64	1	0.9987665892942922		64	1	0.956279		64	1	0.9982243312135403		64	1	0.9903743413555919
65	1	1		65	1	0.9999999999999918		65	1	0.9999999999995569		65	1	0.9999999999746275			65	1	0.9999610056885377		65	1	0.996047		65	1	0.9999536460142914		65	1	0.9997181695938908
66	1	1		66	1	0.9999999994884458		66	1	1		66	1	0.9999988784077837			66	1	0.9999995374725045		66	1	0.307807		66	1	0.5727117359453505		66	1	0.9767441466170097
67	1	1		67	1	0.9999999999999586		67	1	0.9999999929402287		67	1	0.9999999995197035			67	1	0.9910668368706609		67	1	0.967814		67	1	0.9969825707201324		67	1	0.9952638936831348
68	1	1		68	1	0.9999999999995508		68	1	0.999999		68	1	0.9999998233118129			68	1	0.999389		68	1	0.910257		68	1	0.9916246756653702		68	1	0.9977738142934873
69	1	1		69	1	0.9999999999997701		69	1	0.9999999992627936		69	1	0.9999999894605884			69	1	0.9999981732966423		69	1	0.922267		69	1	0.9903411988487684		69	1	0.9977072088266231
70	1	1		70	1	0.9999999999999983		70	1	1		70	1	0.9999999999391583			70	1	0.9998580947589107		70	1	0.988371		70	1	0.9971463227046301		70	1	0.9990064773883551
71	1	1		71	1	0.9999999998528711		71	1	0.9999999986227871		71	1	0.9999999990092828			71	1	0.9948409362939086		71	1	0.943263		71	1	0.9932683594645357		71	1	0.9976990356755592
72	1	1		72	1	0.9999999999980415		72	1	0.9999999999195609		72	1	1			72	1	0.9972501696153178		72	1	0.978076		72	1	0.9969292336344454		72	1	0.9979406810720375
73	1	1		73	1	0.9999999999999964		73	1	1		73	1	0.9999999979157335			73	1	0.9973370816609344		73	1	0.925664		73	1	0.9298786888361721		73	1	0.8862720512511761
74	1	1		74	1	0.9999999998771828		74	1	0.9999999908759535		74	1	0.9999999981776017			74	1	0.981172		74	1	0.864778		74	1	0.9989236232398291		74	1	0.9932482208010309
75	1	1		75	1	0.9999999999765424		75	1	0.9999999807875339		75	1	0.9999999888905415			75	1	0.9986729180764273		75	1	0.400599		75	1	0.980672		75	1	0.9949881129426541
76	1	1		76	1	0.9999999999984117		76	1	0.9999998687583791		76	1	0.9999999897296411			76	1	0.9993061338954179		76	1	0.454236		76	1	0.8729803149736993		76	1	0.9626543479394859
77	1	1		77	1	0.9999999999412005		77	1	0.9999999997013025		77	1	0.9999999946792912			77	1	0.9984882993213187		77	1	0.959892		77	1	0.9988507558626943		77	1	0.9990162760936037
78	1	0.9999999999999982		78	1	0.9999999999973345		78	1	0.9999999999958302		78	1	0.9999999994535016			78	1	0.9976968122491061		78	1	0.978543		78	1	0.996512		78	1	0.998992
79	1	1		79	1	0.9999999999979088		79	1	0.9999999986332059		79	1	0.9999999415784647			79	1	0.9998406197453559		79	1	0.507684		79	1	0.9950263345096366		79	1	0.9965170153110743
80	1	0.9999999999735595		80	1	1		80	1	0.9999999999998727		80	1	0.9999999999887282			80	1	0.9944700415482621		80	1	0.999281		80	1	0.9999106262605568		80	1	0.9990448801704942
81	1	1		81	1	0.9999999999999962		81	1	0.9999999987400673		81	1	0.9999999971619297			81	1	0.9999990368607887		81	1	0.466752		81	1	0.8182357504900167		81	1	0.9630793725382198
82	1	1		82	1	1		82	1	0.9999999999941696		82	1	0.9999999987426993			82	1	0.9999973760957442		82	1	0.998718		82	1	0.9999552720534417		82	1	0.9998700635951167
83	1	1		83	1	0.9999999999999684		83	1	0.9999999991849435		83	1	0.9999999907827464			83	1	0.9998785274491698		83	1	0.5616		83	1	0.8194255259095511		83	1	0.8915590695219456
84	1	1		84	1	1		84	1	0.9999999998503476		84	1	1			84	1	0.9999969524443912		84	1	0.996648		84	1	0.9999746593031212		84	1	0.9970156665955935
85	1	1		85	1	1		85	1	0.9999999999703615		85	1	0.9999999991877132			85	1	0.9997824944113624		85	1	0.955605		85	1	0.9999355070707587		85	1	0.9989173197929668
86	1	1		86	1	1		86	1	0.9999999999917885		86	1	0.9999999918186641			86	1	0.9998487062157367		86	1	0.987719		86	1	0.9996170501915288		86	1	0.99857
87	1	1		87	1	0.9999999999999998		87	1	0.9999999999797226		87	1	0.9999999433085379			87	1	0.9984364359586109		87	1	0.423896		87	1	0.9587754581420982		87	1	0.9980652369281411
88	1	0.9999999999999725		88	1	0.9999999598476018		88	1	0.9999999326911656		88	1	0.9999998435306597			88	1	0.9874359722203527		88	1	0.903937		88	1	0.985341		88	1	0.9984033232765431
89	1	1		89	1	0.9999999998686604		89	1	0.9999996587634553		89	1	0.9999947456701727			89	1	0.9996444526925204		89	1	0.921715		89	1	0.9969862193114649		89	1	0.998885
90	1	1		90	1	0.9999999999999998		90	1	0.9999999999996665		90	1	0.9999999998394704			90	1	0.9997411009351874		90	1	0.995798		90	1	0.9998516393652825		90	1	0.9972958322640154
91	1	1		91	1	0.9999999998731919		91	1	0.9999999994988115		91	1	0.9999999996632123			91	1	0.9998483339048416		91	1	0.776128		91	1	0.9809548194510017		91	1	0.9907646902037506
92	1	1		92	1	0.9999999999905402		92	1	1		92	1	0.9999999600121484			92	1	0.9996496638278815		92	1	0.91078		92	1	0.9994193814041575		92	1	0.9957967821397408
93	1	0.9999999999999997		93	1	0.9999999999999989		93	1	0.9999999999969759		93	1	0.9999999998855472			93	1	0.9956240627209034		93	1	0.995883		93	1	0.9982035318068454		93	1	0.998846
94	1	1		94	1	0.9999999999999948		94	1	0.9999999999984353		94	1	0.9999999988261418			94	1	0.9850421665380792		94	1	0.864069		94	1	0.9853674488476875		94	1	0.9967722392913924
95	1	1		95	1	1		95	1	0.9999999999998481		95	1	0.9999999999287742			95	1	0.9966360119347875		95	1	0.886316		95	1	0.9962742113678922		95	1	0.9973302020035908
96	1	1		96	1	0.9999999999999852		96	1	0.9999999999616521		96	1	0.9999999998215741			96	1	0.9992078799673629		96	1	0.990956		96	1	0.9990094232575009		96	1	0.9992288183686148
97	1	1		97	1	0.9999999999999994		97	1	0.9999999999964481		97	1	0.9999999997957901			97	1	0.9999481728381581		97	1	0.830188		97	1	0.9998709846448127		97	1	0.998836
98	1	1		98	1	0.9999999999999998		98	1	0.9999999999917412		98	1	0.9999999979368572			98	1	0.999989		98	1	0.896653		98	1	0.9988256795566587		98	1	0.999247
99	1	1		99	1	0.9999999999999039		99	1	0.9999999999725023		99	1	0.9999999983546287			99	1	0.9999238355743342		99	1	0.964893		99	1	0.9995105167694759		99	1	0.9989452583838081
100	1	1		100	1	0.9131195524119061		100	1	0.5955456876252117		100	1	0.8170524007694707			100	1	0.9994317704725861		100	1	0.156814		100	1	0.2463938294344854		100	1	0.3316036563219466
101	1	1		101	1	0.8421841662320145		101	1	0.9988678308965452		101	1	0.9802702376723308			101	1	0.9996040838628575		101	1	0.177451		101	1	0.0860925		101	1	0.4000718043792611
102	1	1		102	1	0.9999999997881295		102	1	0.9999996860037844		102	1	0.9999999795696483			102	1	0.9999913460093427		102	1	0.977566		102	1	0.9963617553572087		102	1	0.996307
103	1	1		103	1	0.9999999622952589		103	1	0.9999988298043745		103	1	0.9999999635909079			103	1	0.9986701447809192		103	1	0.961461		103	1	0.9955251681866711		103	1	0.99698
104	1	1		104	1	0.9999999999893839		104	1	0.9999998288936855		104	1	0.9999999901440509			104	1	0.9999404733498575		104	1	0.886281		104	1	0.996097		104	1	0.9859087306147508
105	1	1		105	1	0.9999999999724084		105	1	0.9999991459271029		105	1	0.9999999486299994			105	1	0.9999813556545332		105	1	0.96979		105	1	0.9954695223651139		105	1	0.9957170821011848
106	1	1		106	1	0.9999999999999329		106	1	0.999998		106	1	0.9999999999840298			106	1	0.9994137508701676		106	1	0.962057		106	1	0.9985358601344174		106	1	0.9941158053129069
107	1	1		107	1	0.9999999999999262		107	1	0.9999999118950557		107	1	0.9999999998129697			107	1	0.9999403181526341		107	1	0.983874		107	1	0.9990105814352318		107	1	0.990187
108	1	1		108	1	0.9999999993609285		108	1	0.9999996359699662		108	1	0.9999999319094016			108	1	0.9999720178736005		108	1	0.974594		108	1	0.9961587314068564		108	1	0.998164
109	1	1		109	1	0.9999999999936157		109	1	0.9999999740581222		109	1	0.9999999994957303			109	1	0.9160789867749777		109	1	0.521491		109	1	0.8866786201829826		109	1	0.9210854293065068
110	1	1		110	1	0.9999999999999964		110	1	0.9999999134555148		110	1	0.9999998991315285			110	1	0.6974035193371868		110	1	0.966486		110	1	0.9969354567686959		110	1	0.9874989246007663
111	1	1		111	1	0.9999999999856314		111	1	0.9999998733487127		111	1	0.9999999747413979			111	1	0.9059654337552144		111	1	0.355719		111	1	0.7137000964863136		111	1	0.9523283434009477
112	1	1		112	1	1		112	1	0.9999978299995902		112	1	0.9999999970486934			112	1	0.961001		112	1	0.680281		112	1	0.9602809763565159		112	1	0.9921315451682525
113	1	1		113	1	0.9999999999959617		113	1	0.9999996235088165		113	1	0.9999999998338972			113	1	0.9986622637249809		113	1	0.976036		113	1	0.9975942591816079		113	1	0.9908721961260041
114	1	1		114	1	0.9999999999986493		114	1	0.9999997428979303		114	1	0.9999999997782689			114	1	0.9994866929775074		114	1	0.982864		114	1	0.9993600479075727		114	1	0.9936925797535712
115	1	1		115	1	0.9999999999999213		115	1	0.9999995387281807		115	1	0.9999999997480593			115	1	0.9998771019376689		115	1	0.982469		115	1	0.9989781802728658		115	1	0.9986081275723492
116	1	1		116	1	0.9999999999953977		116	1	1		116	1	0.9999999997507635			116	1	0.9998077176401065		116	1	0.969165		116	1	0.9989572069391542		116	1	0.9968823991398159
117	1	1		117	1	0.9999999974124656		117	1	0.9999990481495038		117	1	0.9999999941973438			117	1	0.7641654903884321		117	1	0.633009		117	1	0.9858867362216294		117	1	0.9720205820678358
118	1	1		118	1	1		118	1	0.9999983245492748		118	1	0.9999999986161376			118	1	0.9963087152316537		118	1	0.719697		118	1	0.9889919057806094		118	1	0.8997518434774681
119	1	1		119	1	0.9999999999331249		119	1	0.9999994530786996		119	1	0.9999999558140903			119	1	0.9999854380175822		119	1	0.980396		119	1	0.9949873717583576		119	1	0.9977433275854507
120	1	1		120	1	0.9999999999926431		120	1	0.9999995860117677		120	1	0.9999999224925675			120	1	0.9945708252824671		120	1	0.561171		120	1	0.7727904325370684		120	1	0.9922849381741825
121	1	1		121	1	1		121	1	0.9999996873344321		121	1	1			121	1	0.9999815861808864		121	1	0.97722		121	1	0.995667		121	1	0.9955974635645134
122	1	1		122	1	0.9999999999949836		122	1	0.9999998558730411		122	1	1			122	1	0.9999127754394138		122	1	0.987266		122	1	0.9974718298221118		122	1	0.9906505284972936
123	1	1		123	1	0.9999999996695416		123	1	0.9999999680098002		123	1	0.9999997545995813			123	1	0.9999120445845961		123	1	0.972879		123	1	0.9656150791962315		123	1	0.9866475381502632
124	1	1		124	1	0.9999999980708765		124	1	0.9999995892733144		124	1	0.9999998123464324			124	1	0.9999800567840106		124	1	0.986064		124	1	0.9734031291710532		124	1	0.9993884091851591
125	1	0.9999948103890851		125	1	0.8525030125945714		125	1	0.9629593317239077		125	1	0.9827864325145431			125	1	0.8810646378244494		125	1	0.414666		125	1	0.4274528736660478		125	1	0.8062618890707287
126	1	1		126	1	0.9999999998798249		126	1	0.9999999719094795		126	1	0.9999996730472795			126	1	0.9989236151262929		126	1	0.141367		126	1	0.21790181861129718		126	1	0.16801271708266113
127	1	1		127	1	0.9999999999972816		127	1	0.9999999991798344		127	1	0.9999980906108935			127	1	0.9994406547953607		127	1	0.919571		127	1	0.990109		127	1	0.9782213960967847
128	1	1		128	1	0.9999999999922876		128	1	0.9999999854132918		128	1	0.9999999965602266			128	1	0.9997261690548187		128	1	0.927728		128	1	0.9777692039062833		128	1	0.9153117842527958
129	1	1		129	1	0.9999999899539236		129	1	0.9999999996432215		129	1	0.9999999992116209			129	1	0.9998563844083146		129	1	0.961812		129	1	0.9763638499995301		129	1	0.9861122134968257
130	1	1		130	1	0.9999999996651425		130	1	0.9999999677901047		130	1	0.9999997698703975			130	1	0.999241		130	1	0.167448		130	1	0.32540115727799473		130	1	0.6696890797624556
131	1	1		131	1	0.9999997495606148		131	1	0.9999964789534446		131	1	0.9999999993845106			131	1	0.9997687961443994		131	1	0.313756		131	1	0.3303012147437529		131	1	0.7131988110086528
132	1	1		132	1	0.9999999999962638		132	1	0.9999999001843228		132	1	0.9999999980750065			132	1	0.9998215764935033		132	1	0.913356		132	1	0.9853800351033223		132	1	0.9974982789454129
133	1	1		133	1	0.9999999999784037		133	1	0.9999999404461453		133	1	0.9999999962235184			133	1	0.9999340915563147		133	1	0.963524		133	1	0.995399		133	1	0.9987905871114516
134	1	1		134	1	0.9999999826616854		134	1	0.9999998679957599		134	1	0.9999981445827263			134	1	0.9999249627256868		134	1	0.313272		134	1	0.3201090503917071		134	1	0.8943333984956656
135	1	1		135	1	0.9999999999984768		135	1	0.9999998917890065		135	1	0.9999999978968281			135	1	0.9998989660395243		135	1	0.907636		135	1	0.9916689312026838		135	1	0.9989889080147633
136	1	1		136	1	0.9999999989638465		136	1	0.9999999989826466		136	1	0.9999999809173595			136	1	0.989006		136	1	0.975658		136	1	0.9659875171982564		136	1	0.8895094285880031
137	1	1		137	1	0.9999999999687919		137	1	0.9999999239590394		137	1	0.9999999238923128			137	1	0.9999808113061271		137	1	0.962957		137	1	0.9919797576856391		137	1	0.9893170668866383
138	1	1		138	1	0.9999999844275554		138	1	0.9999999676881786		138	1	0.9999989383050266			138	1	0.9999993269071481		138	1	0.731616		138	1	0.7989732217825858		138	1	0.8133251465042916
139	1	1		139	1	0.9999998587526162		139	1	0.9998411551856895		139	1	0.9150283450946275			139	1	0.9999696870208499		139	1	0.514975		139	1	0.3693840879556567		139	1	0.5036657471952819
140	1	1		140	1	0.9999990550075123		140	1	0.9999998794010483		140	1	0.9999999191867393			140	1	0.998497		140	1	0.425413		140	1	0.6401262559048956		140	1	0.9900675524288319
141	1	1		141	1	0.9999999980600464		141	1	0.9999999528076765		141	1	0.9999999945483241			141	1	0.9999997893982756		141	1	0.764091		141	1	0.9774742247727435		141	1	0.9976029427512713
142	1	1		142	1	0.9999982968639429		142	1	0.9999995300774643		142	1	0.9999959788020882			142	1	0.9999977375585728		142	1	0.405736		142	1	0.3670091663305293		142	1	0.48441886712619975
143	1	1		143	1	0.9999999999647009		143	1	0.9999999694256758		143	1	0.9810545495213197			143	1	0.9999757200311088		143	1	0.982212		143	1	0.8893043928071913		143	1	0.9629981000468146
144	1	1		144	1	0.9999999941061989		144	1	0.9999999938044595		144	1	1			144	1	0.9999262592533326		144	1	0.974718		144	1	0.9154136550882342		144	1	0.9951993783262764
145	1	1		145	1	1		145	1	0.9999994879420149		145	1	0.9999998847697995			145	1	0.9999473201929275		145	1	0.555257		145	1	0.7347285532228869		145	1	0.9897788326528246
146	1	1		146	1	0.9999999999999502		146	1	0.9999869306531209		146	1	0.9999999984880648			146	1	0.9402979619496191		146	1	0.819975		146	1	0.9904612638817862		146	1	0.9960108238969996
147	1	1		147	1	0.9999999999993459		147	1	0.9999326955261058		147	1	0.9362258787379667			147	1	0.9996586035395795		147	1	0.657012		147	1	0.9190537210859008		147	1	0.7157609217064183
148	1	1		148	1	0.9999876083673545		148	1	0.9987220319027078		148	1	0.9999972769719296			148	1	0.9997804918680641		148	1	0.487235		148	1	0.9558988373922155		148	1	0.9916618108233253
149	1	1		149	1	1		149	1	0.9999999281690635		149	1	0.9999999999905242			149	1	0.9934732864018012		149	1	0.956439		149	1	0.9991028507984169		149	1	0.9876675371060044
150	1	1		150	1	1		150	1	0.9999330290793034		150	1	0.9999997176477738			150	1	0.9998248105086536		150	1	0.845406		150	1	0.9819065763361062		150	1	0.9830395698725782
151	1	1		151	1	0.9999999999999981		151	1	0.9999882562422465		151	1	0.9999999999973926			151	1	0.9999999942787401		151	1	0.986633		151	1	0.9972768305502152		151	1	0.9877934563858933
152	1	1		152	1	0.9999999999992274		152	1	0.9999550742794817		152	1	0.9999967368473925			152	1	0.9999975904273393		152	1	0.972049		152	1	0.9934053294890082		152	1	0.7772682118888615
153	1	1		153	1	0.9999999856097606		153	1	0.9999850033055127		153	1	0.9999967913500024			153	1	0.999999		153	1	0.303767		153	1	0.0869701		153	1	0.3020179469147597
154	1	1		154	1	0.9999999999998572		154	1	0.9999815930498119		154	1	0.9999999999053543			154	1	0.9999999566784328		154	1	0.996573		154	1	0.9959027985970716		154	1	0.98623
155	1	1		155	1	0.9999998823241383		155	1	0.9996788216588275		155	1	0.9999999917807336			155	1	0.9999999022078396		155	1	0.983296		155	1	0.9926976375410153		155	1	0.9969876327386266
156	1	1		156	1	0.9999999999999057		156	1	1		156	1	0.9999999999876146			156	1	0.9999898286217216		156	1	0.989507		156	1	0.9974808888845413		156	1	0.995637
157	1	1		157	1	0.9999999976874749		157	1	0.9999976578573861		157	1	0.9999953417154436			157	1	0.9703801365680437		157	1	0.873277		157	1	0.9766498545067102		157	1	0.6549566273819335
158	1	1		158	1	0.9999999999970564		158	1	0.9999992944198937		158	1	0.9999989560446964			158	1	0.9999978001678007		158	1	0.678368		158	1	0.771626		158	1	0.9477676186489113
159	1	1		159	1	0.9999999994045012		159	1	0.999955		159	1	0.9542759000796601			159	1	0.9993387819505575		159	1	0.312152		159	1	0.6803782565616712		159	1	0.7098617672020752
160	1	1		160	1	0.9999999999998878		160	1	0.9999448420142217		160	1	0.9999997391354847			160	1	0.9029071587059435		160	1	0.725236		160	1	0.987448		160	1	0.9651542754541953
161	1	1		161	1	0.9999999999885255		161	1	0.999982		161	1	0.9999148321408402			161	1	0.9680095174186358		161	1	0.728625		161	1	0.9316749211889946		161	1	0.9527256425981936
162	1	1		162	1	0.9999999999998908		162	1	0.9999856262882799		162	1	0.9999999998572622			162	1	0.9999999662347165		162	1	0.99199		162	1	0.9955119867067405		162	1	0.9872030427371815
163	1	1		163	1	0.9999999999982333		163	1	0.9999986617072288		163	1	0.9999999031543273			163	1	0.9999984531051292		163	1	0.585165		163	1	0.6312581029288209		163	1	0.5287151669844026
164	1	1		164	1	0.9999999999133948		164	1	0.9998684816917959		164	1	0.9558899279384278			164	1	0.9809760428729044		164	1	0.547577		164	1	0.9315167933359542		164	1	0.9444326764602065
165	1	1		165	1	0.9999999999996932		165	1	0.9999981704400617		165	1	0.9999807315167982			165	1	0.9999999862163026		165	1	0.991902		165	1	0.9949919389154112		165	1	0.9969149058953803
166	1	1		166	1	0.9999993016062806		166	1	0.9999751668143927		166	1	0.9820382885206045			166	1	0.9571716956242919		166	1	0.135821		166	1	0.2219220798331557		166	1	0.23209870294274576
167	1	1		167	1	0.9999999999999968		167	1	0.9999990943586876		167	1	0.9999998762064493			167	1	0.999927		167	1	0.892019		167	1	0.9943898947503854		167	1	0.9984614679568632
168	1	1		168	1	0.9999999999999989		168	1	0.9999981194767481		168	1	0.9999999999909255			168	1	0.9999999575675589		168	1	0.996792		168	1	0.9977416938840005		168	1	0.9982258541220297
169	1	1		169	1	0.9999999999655719		169	1	0.9999992361172313		169	1	0.9999999997010598			169	1	0.9999999955621036		169	1	0.886748		169	1	0.9977098800187454		169	1	0.8519205394294915
170	1	1		170	1	0.9999999999928597		170	1	0.9999999693763366		170	1	0.9999999996450464			170	1	0.9990268154593268		170	1	0.991833		170	1	0.9987552408560832		170	1	0.9978805181760808
171	1	1		171	1	0.9999999999435566		171	1	0.999999		171	1	0.9999999981980346			171	1	0.9999892493507181		171	1	0.999236		171	1	0.9992058535986975		171	1	0.9997384724704411
172	1	1		172	1	0.9999999999994892		172	1	0.9999999924540622		172	1	0.9999999964733722			172	1	0.9999321913458766		172	1	0.996365		172	1	0.9986009149195832		172	1	0.9941102247455632
173	1	1		173	1	0.9999999999998938		173	1	1		173	1	0.9999999993631569			173	1	0.9999980164342115		173	1	0.992656		173	1	0.9969258390271785		173	1	0.9982472276854176
174	1	1		174	1	0.9999999999976938		174	1	0.9999999714320948		174	1	0.9999999982771173			174	1	0.99953		174	1	0.997593		174	1	0.9975584710943648		174	1	0.9989911680342827
175	1	1		175	1	0.9999999999999046		175	1	0.9999999016948264		175	1	0.9999999989566793			175	1	0.9999942838727744		175	1	0.994062		175	1	0.9957683146530378		175	1	0.9956777372822034
176	1	1		176	1	0.9999999999735336		176	1	0.9999996726855814		176	1	0.9999999085743814			176	1	0.9982039323928961		176	1	0.932512		176	1	0.9948805506486017		176	1	0.9538783373185079
177	1	1		177	1	0.9999999999987503		177	1	0.9999999737161357		177	1	0.9999999909590566			177	1	0.9999370860825991		177	1	0.992005		177	1	0.9965412254446465		177	1	0.998794
178	1	1		178	1	0.9999999999986141		178	1	1		178	1	0.9999999842152457			178	1	0.9999252360902712		178	1	0.995976		178	1	0.998055		178	1	0.9884951914031413
179	1	1		179	1	0.9999999917873794		179	1	0.9999993732314565		179	1	0.9999999439785964			179	1	0.9999844710131767		179	1	0.90107		179	1	0.995212		179	1	0.9979071365813066
180	1	1		180	1	0.9999998968015482		180	1	0.9999688134644085		180	1	0.9999112019422033			180	1	0.9999999873733394		180	1	0.988085		180	1	0.9932564413964493		180	1	0.9994530619991299
181	1	0.9999999994121095		181	1	0.9998586464957131		181	1	0.9999874917012824		181	1	0.9999995764004684			181	1	0.9953695964284653		181	1	0.984272		181	1	0.992734		181	1	0.9987978173925395
182	1	1		182	1	1		182	1	0.9999626621509622		182	1	0.9999998679348551			182	1	0.9984851736728589		182	1	0.918671		182	1	0.9965591767093944		182	1	0.9906486364814692
183	1	1		183	1	0.9999999999947589		183	1	0.9999998181135867		183	1	0.9999999911618392			183	1	0.9999866530423676		183	1	0.997123		183	1	0.9978551829985454		183	1	0.9959053230305482
184	1	1		184	1	1		184	1	0.9999999741041684		184	1	0.9999999865437822			184	1	0.9996529981662852		184	1	0.998146		184	1	0.998554		184	1	0.9963051607221464
185	1	1		185	1	0.9999999840096879		185	1	0.9999973049210376		185	1	0.9999990770983839			185	1	0.9999999634375378		185	1	0.986808		185	1	0.9999073971980958		185	1	0.9968283126287787
186	1	1		186	1	0.9999993758340083		186	1	0.9995528655640255		186	1	0.9976346555426407			186	1	0.9984795873386096		186	1	0.0659142		186	1	0.27518157280025274		186	1	0.20648233332577995
187	1	1		187	1	0.9999999999349244		187	1	1		187	1	0.9999996579155833			187	1	0.9999007107982404		187	1	0.965311		187	1	0.9971959695575416		187	1	0.9998511102446156
188	1	1		188	1	1		188	1	0.9999930195270306		188	1	0.9999999993570214			188	1	0.9999999457753951		188	1	0.99969		188	1	0.996982		188	1	0.999853
189	1	1		189	1	0.9999999991358396		189	1	0.9999929823611636		189	1	0.9999999892213984			189	1	1		189	1	0.998836		189	1	0.9998984195424603		189	1	0.9986006297221182
190	1	1		190	1	1		190	1	0.9999930996719532		190	1	0.9999999825039505			190	1	0.999929		190	1	0.957992		190	1	0.9962622904961745		190	1	0.9937466553682266
191	1	1		191	1	0.9999999998163926		191	1	0.9999646852561772		191	1	0.9999999948135398			191	1	0.9802115181084247		191	1	0.935866		191	1	0.9970718395614935		191	1	0.9846171052036051
192	1	1		192	1	0.9999998146697877		192	1	0.9999820670103586		192	1	0.999999			192	1	0.999999		192	1	0.930441		192	1	0.9908447994937374		192	1	0.9967840981849508
193	1	1		193	1	0.9999999990747138		193	1	0.999993		193	1	0.9999999976018846			193	1	0.9963304752188905		193	1	0.113971		193	1	0.20685132122951536		193	1	0.19809234968768985
194	1	1		194	1	0.9999999987945758		194	1	0.9999969924776372		194	1	1			194	1	0.9999910985239592		194	1	0.979948		194	1	0.998922		194	1	0.999609
195	1	1		195	1	1		195	1	0.9999879219785007		195	1	0.9999999986583012			195	1	0.9999994670475202		195	1	0.972804		195	1	0.9720986027166171		195	1	0.9844816374471872
196	1	1		196	1	0.9999999999745225		196	1	0.9999995482366597		196	1	0.9999999876990535			196	1	0.9999999563456865		196	1	0.999581		196	1	0.9994414541382154		196	1	0.9998753921226848
197	1	1		197	1	1		197	1	0.9999495798395973		197	1	0.999997			197	1	0.9999994592989974		197	1	0.319421		197	1	0.5996083135801046		197	1	0.7619289420923735
198	1	1		198	1	0.9999999999440897		198	1	0.9999998291992557		198	1	1			198	1	0.9998642903609715		198	1	0.994002		198	1	0.9969972270531963		198	1	0.9991006961686935
199	1	1		199	1	0.9999999745370572		199	1	0.9999987757689176		199	1	0.9999992860987656			199	1	0.9988657233500904		199	1	0.975773		199	1	0.9921943319298883		199	1	0.9849435629781875
200	1	1		200	1	0.9999999997045584		200	1	0.9999848518249584		200	1	0.9995102879716844			200	1	0.9999999810388935		200	1	0.412285		200	1	0.9873211458553696		200	1	0.9988791212048341
201	1	1		201	1	0.9999999999844829		201	1	0.9999999999659044		201	1	0.9999564155392092			201	1	0.9992161348624353		201	1	0.798181		201	1	0.995859		201	1	0.970189
202	1	1		202	1	0.9999999993541149		202	1	0.9999676478061269		202	1	0.999401			202	1	0.9999998780594169		202	1	0.628309		202	1	0.39141772649398443		202	1	0.5476709039728336
203	1	1		203	1	0.9999999996399817		203	1	0.9999897679960312		203	1	0.8092247409802382			203	1	0.999998		203	1	0.912868		203	1	0.9998159719170323		203	1	0.598729
204	1	1		204	1	0.9999999999998641		204	1	0.9999999997047826		204	1	0.9959188632118879			204	1	0.9883496880049366		204	1	0.865146		204	1	0.9411067368284494		204	1	0.8076526294089735
205	1	1		205	1	0.9999999999999202		205	1	0.9999999998684573		205	1	0.937341			205	1	0.9999985045446907		205	1	0.202005		205	1	0.34762574036290267		205	1	0.19892969779815708
206	1	0.9999999999999972		206	1	0.9999994438327507		206	1	0.9999999536203931		206	1	0.999946			206	1	0.9999532315044058		206	1	0.996822		206	1	0.9996760594973334		206	1	0.9764112826883088
207	1	0.9999999999999986		207	1	0.9999997651724539		207	1	0.9999999996144956		207	1	0.9500762292354642			207	1	0.9993977381273734		207	1	0.983403		207	1	0.9999269339291624		207	1	0.9009644857316699
208	1	1		208	1	0.9999993169956961		208	1	0.9999999880775777		208	1	0.9983470550890671			208	1	0.9993226231611194		208	1	0.974292		208	1	0.9982646746135885		208	1	0.9685945492948892
209	1	1		209	1	0.9999987898221071		209	1	0.999999		209	1	0.8017494774345497			209	1	0.9701069094197903		209	1	0.309778		209	1	0.6053296215657272		209	1	0.7985179123253546
210	1	0.9999999999999738		210	1	0.999999		210	1	0.9999999986342594		210	1	0.871559			210	1	0.9936106176556905		210	1	0.970412		210	1	0.9998787562340001		210	1	0.5654047315405821
211	1	0.9999999999999976		211	1	0.9999988826152012		211	1	0.9999999992448854		211	1	0.9932766640375258			211	1	0.9998189595939411		211	1	0.992434		211	1	0.9997168396018691		211	1	0.9361705554423047
212	1	1		212	1	0.9999998823497994		212	1	0.9999999995728978		212	1	0.9507391858539089			212	1	0.9998680309028979		212	1	0.988496		212	1	0.9999135326219245		212	1	0.9575771713914604
213	1	0.9999999999999026		213	1	0.999999		213	1	0.9999999560850055		213	1	0.9977165904281168			213	1	0.9999839330387383		213	1	0.983803		213	1	0.9991545638923776		213	1	0.7590149288022363
214	1	0.9999999999999668		214	1	0.9999999940806552		214	1	0.9999995574379578		214	1	0.8787676666485394			214	1	0.999641		214	1	0.248139		214	1	0.921607		214	1	0.42425505586213813
215	1	0.9999999999998034		215	1	0.999999		215	1	0.9999999997323838		215	1	0.7053813759721435			215	1	0.9991969496893399		215	1	0.968901		215	1	0.9998985147376908		215	1	0.6090942630535333
216	1	1		216	1	0.999999		216	1	0.9999999954332096		216	1	0.9955935684001466			216	1	0.9995829755073995		216	1	0.987816		216	1	0.997386		216	1	0.9539090679433417
217	1	1		217	1	0.9999999999988862		217	1	0.9999998883236162		217	1	0.9999997775088528			217	1	0.9999999845356526		217	1	0.995337		217	1	0.9972966921587325		217	1	0.9998142473306794
218	1	0.9999999999999986		218	1	0.9999999999910311		218	1	0.9999999842753052		218	1	0.9999994735333051			218	1	0.999998		218	1	0.972741		218	1	0.9977111165219295		218	1	0.9979718974467942
219	1	0.9999999999999798		219	1	0.9999999870396187		219	1	0.9999998734311972		219	1	0.9999973217586613			219	1	0.9999999470709584		219	1	0.966905		219	1	0.9857267237158597		219	1	0.988208
220	1	0.9999999999999842		220	1	0.9999999999592002		220	1	0.9999996709014697		220	1	0.9999959590264347			220	1	0.9999999412292156		220	1	0.967119		220	1	0.999055		220	1	0.9966574701583745
221	1	1		221	1	0.9999999999997418		221	1	0.9999999885469556		221	1	0.999999			221	1	0.9999948012992472		221	1	0.995408		221	1	0.9994229368285447		221	1	0.9991651497807407
222	1	1		222	1	1		222	1	0.9999992765661315		222	1	0.9999983954863187			222	1	0.9999999898369271		222	1	0.990445		222	1	0.9971744647107357		222	1	0.9992967775786262
223	1	1		223	1	0.9999999999998025		223	1	0.9999999746455782		223	1	0.9999999168208363			223	1	0.9999999934336867		223	1	0.996077		223	1	0.9982716953744649		223	1	0.9996238066584949
224	1	0.9999999999788829		224	1	0.9999997555021966		224	1	0.9999784768076889		224	1	0.9987609268962594			224	1	0.9965154616483188		224	1	0.496485		224	1	0.8525543329825005		224	1	0.8994621842794965
225	1	1		225	1	0.9999999999922968		225	1	0.9999994590565817		225	1	0.9999995126121632			225	1	0.9999991488519815		225	1	0.99799		225	1	0.9993168454829748		225	1	0.9990000219352925
226	1	0.9999999999999923		226	1	1		226	1	0.9999999453175097		226	1	0.9999982738503613			226	1	0.9999956060582124		226	1	0.964591		226	1	0.9992372415765246		226	1	0.9972297169242564
227	1	1		227	1	0.9999999999992369		227	1	0.9999999178450107		227	1	0.9999998620051194			227	1	0.9999999499419708		227	1	0.978601		227	1	0.9690596377519023		227	1	0.9967844660810345
228	1	1		228	1	0.9999999999998616		228	1	1		228	1	0.9999998015851934			228	1	0.9999998512537116		228	1	0.927251		228	1	0.9976531751268095		228	1	0.9986544456759389
229	1	0.9999999999999993		229	1	0.9999999999997682		229	1	0.9999999377060479		229	1	0.9999998777277488			229	1	0.9999999129519074		229	1	0.996156		229	1	0.9987922213155258		229	1	0.998297
230	1	1		230	1	0.9999999999994886		230	1	0.9999999747120984		230	1	1			230	1	0.9999995133371535		230	1	0.944852		230	1	0.9927198048329968		230	1	0.9977159152323662
231	1	0.9999999999999917		231	1	1		231	1	0.9999997586937187		231	1	0.9999979636545661			231	1	0.9999999784149783		231	1	0.96973		231	1	0.9981670445043819		231	1	0.992657
232	1	1		232	1	0.9999999999970974		232	1	0.9999999999193261		232	1	0.9999999283946992			232	1	0.9999506221382312		232	1	0.995278		232	1	0.999621		232	1	0.9935060798714818
233	1	1		233	1	0.9999999992773109		233	1	0.9999998222503756		233	1	0.9999998655121906			233	1	0.9999996799450965		233	1	0.992878		233	1	0.9998795367951732		233	1	0.9996721180832431
234	1	0.9999999999999993		234	1	0.9999999999714045		234	1	0.9999993154322915		234	1	0.9999982712655602			234	1	0.9999999996868673		234	1	0.863047		234	1	0.9929390902400476		234	1	0.9604814367320501
235	1	1		235	1	0.9999999999979363		235	1	0.9999999634967719		235	1	0.9999944876969404			235	1	0.9999911752236305		235	1	0.994327		235	1	0.9992184324842944		235	1	0.9995675734404921
236	1	0.9999999999999623		236	1	0.9999999999989302		236	1	0.9999999441316632		236	1	0.9999988883930798			236	1	0.9999999952271369		236	1	0.982101		236	1	0.9963246924368871		236	1	0.9937286992778082
237	1	0.9999999999999941		237	1	0.9999999617958679		237	1	0.9999999817589662		237	1	0.9999998693360315			237	1	0.9998534090496451		237	1	0.830038		237	1	0.9973805035047906		237	1	0.9889367915290398
238	1	1		238	1	0.9999999999998744		238	1	0.9999999999786696		238	1	0.9999984104496197			238	1	0.9998361083357981		238	1	0.946638		238	1	0.9910103332188197		238	1	0.9864951437128999
239	1	1		239	1	0.9999999999973328		239	1	0.9999998341620769		239	1	0.9999997051497717			239	1	0.9999999910944185		239	1	0.825854		239	1	0.9899902268806293		239	1	0.9990507852541455
240	1	0.9999999999999863		240	1	0.9999999999988135		240	1	0.9999999793437088		240	1	0.9999998708441409			240	1	0.9998569107590262		240	1	0.768522		240	1	0.9835040097101826		240	1	0.9944221164163576
241	1	1		241	1	0.9999999984024301		241	1	0.9999999882733605		241	1	0.9989374737278739			241	1	0.9999994957474707		241	1	0.998192		241	1	0.9998118526599948		241	1	0.9994320172277463
242	1	0.9999999999999875		242	1	0.9999999999993153		242	1	1		242	1	0.9999998703304662			242	1	0.9999999990586139		242	1	0.992392		242	1	0.9974266459199747		242	1	0.9956417469765744
243	1	0.9999999999999997		243	1	0.9999999999546695		243	1	0.9999999903474938		243	1	0.9999997451359746			243	1	1		243	1	0.959323		243	1	0.9984671976596697		243	1	0.9965722171494619
244	1	1		244	1	0.9998287421086716		244	1	0.9998249873022654		244	1	0.9999719421117392			244	1	0.9999999903142518		244	1	0.879619		244	1	0.9880714667540654		244	1	0.9857368316694762
245	1	1		245	1	0.9999999999110906		245	1	0.9999999707029913		245	1	0.9999999462383505			245	1	0.9999997549581289		245	1	0.98453		245	1	0.997665		245	1	0.9978841997073766
246	1	0.9999999999999997		246	1	0.9999999999982442		246	1	1		246	1	0.9999996123955585			246	1	0.9999999445412157		246	1	0.974792		246	1	0.9981769775889964		246	1	0.9948952892167482
247	1	1		247	1	0.9999999999899414		247	1	0.9999999652686691		247	1	0.9999996475816625			247	1	0.9999999442857765		247	1	0.994538		247	1	0.9988695859989906		247	1	0.9979575459159605
248	1	0.9999999999999993		248	1	0.9999999999246317		248	1	0.9999997498408172		248	1	0.9999996896902523			248	1	0.9999248154783523		248	1	0.765928		248	1	0.9771370312618082		248	1	0.9977484158632616
249	1	1		249	1	0.9999999999949991		249	1	0.9999999098817611		249	1	0.9999978882826474			249	1	0.9999999969685304		249	1	0.978611		249	1	0.99728		249	1	0.9959051358305059
250	1	1		250	1	0.9999999999894649		250	1	0.9999999586787706		250	1	0.9999998329460686			250	1	0.9999981978178833		250	1	0.979123		250	1	0.9935482207966019		250	1	0.9974525635534435
251	1	0.9999999999999997		251	1	1		251	1	1		251	1	0.999995			251	1	0.9999999999560619		251	1	0.961086		251	1	0.9980348090423445		251	1	0.9995876590446359
252	1	1		252	1	0.9999999999988931		252	1	0.9999999714561985		252	1	0.9999999897435614			252	1	1		252	1	0.9926		252	1	0.9989383877432343		252	1	0.9987568415915236
253	1	1		253	1	0.9999999999657752		253	1	0.9999994183407451		253	1	0.9999993673073989			253	1	0.9999999624056827		253	1	0.994238		253	1	0.9984820882952564		253	1	0.9990708861056782
254	1	0.9999999999999997		254	1	0.9999999999701082		254	1	0.9999997508613991		254	1	0.9999993797250653			254	1	0.9999959308206554		254	1	0.99691		254	1	0.9664377448024773		254	1	0.9691077496824635
255	1	0.9999999999998802		255	1	0.9999999999956332		255	1	0.9999998589343366		255	1	0.9999999080221428			255	1	0.9999998274265284		255	1	0.973969		255	1	0.9982472552030296		255	1	0.9971402154902154
256	1	1		256	1	0.9999999999999815		256	1	0.9999999999908272		256	1	0.9994677870390154			256	1	0.9999962527143301		256	1	0.998773		256	1	0.9991425728588659		256	1	0.8871062538229806
257	1	1		257	1	0.9999999830410154		257	1	0.9999994079623188		257	1	0.9999996891796001			257	1	0.9999999997521786		257	1	0.957134		257	1	0.9964434208431608		257	1	0.99786
258	1	1		258	1	0.9999999999994976		258	1	0.9999999999862613		258	1	0.9999999993366443			258	1	0.9999875716535196		258	1	0.882327		258	1	0.996485		258	1	0.9973952548515505
259	1	0.9999999999999954		259	1	0.9999999999945703		259	1	0.9999997251379581		259	1	0.9999995572906132			259	1	0.9999999992792175		259	1	0.997749		259	1	0.9992877287293571		259	1	0.9987723109190446
260	1	0.9999999999999976		260	1	1		260	1	0.9999999882652256		260	1	0.9999998425183595			260	1	0.9999991686645696		260	1	0.999073		260	1	0.9992809516799648		260	1	0.9982170955375461
261	1	0.9999999999999993		261	1	0.9999999999941195		261	1	0.9999999999960049		261	1	0.9999945296317744			261	1	0.9998821664107382		261	1	0.997638		261	1	0.9996285538476826		261	1	0.996353
262	1	0.9999999999999997		262	1	0.9999999999778185		262	1	0.9999999234650573		262	1	0.9999993277995436			262	1	0.9999996504083152		262	1	0.974176		262	1	0.9881367619632146		262	1	0.9950595778792445
263	1	0.9999999999999997		263	1	0.9999999999993826		263	1	0.9999999720898143		263	1	1			263	1	0.9999999991717234		263	1	0.995248		263	1	0.9977077556511461		263	1	0.9991577282250845
264	1	1		264	1	0.9999999999998229		264	1	0.9999999818795066		264	1	0.9999999676430789			264	1	0.9999956517175709		264	1	0.983473		264	1	0.9982191297586296		264	1	0.9981749274867047
265	1	0.9999999999999616		265	1	0.9999999999909932		265	1	0.9999999420113965		265	1	0.9999989888099624			265	1	0.9999998527640941		265	1	0.832064		265	1	0.997743		265	1	0.997749
266	1	0.9999999999999909		266	1	0.9999977102832126		266	1	0.9999954845289667		266	1	0.9999993926166949			266	1	0.9999830550451598		266	1	0.757876		266	1	0.9844993652843065		266	1	0.9934896053230622
267	1	0.9999999999999986		267	1	0.9999999999773546		267	1	0.9999998418577646		267	1	0.9999945655504692			267	1	0.9999999995765122		267	1	0.902227		267	1	0.9962251383737888		267	1	0.9985346837090044
268	1	0.9999999999999993		268	1	0.9999999999500215		268	1	0.9999999997478002		268	1	0.9999974971469932			268	1	0.9965175569035672		268	1	0.943171		268	1	0.9960779338322152		268	1	0.8029624235661269
269	1	1		269	1	0.9999999194663789		269	1	0.9999829405862772		269	1	0.9999950885478075			269	1	0.9999292631870447		269	1	0.631379		269	1	0.9698340611342722		269	1	0.9462405933802329
270	1	1		270	1	0.9999999999866794		270	1	0.9999946373293026		270	1	0.9999998857996855			270	1	0.9999996741502816		270	1	0.856315		270	1	0.9864724775405568		270	1	0.9995800011442878
271	1	1		271	1	0.9999999999981352		271	1	0.9999999273266574		271	1	0.9999998680255178			271	1	0.9999999130611398		271	1	0.91661		271	1	0.9895628092186854		271	1	0.9930661907170774
272	1	1		272	1	0.9999999999968817		272	1	0.9999998624709404		272	1	0.9999999118285037			272	1	0.9999999321143576		272	1	0.985925		272	1	0.9966893684501053		272	1	0.9994997347832068
273	1	1		273	1	0.9999999999990018		273	1	0.9999999842717673		273	1	0.9999996629362465			273	1	0.9999999686921098		273	1	0.995959		273	1	0.998993		273	1	0.9914940362619576
274	1	1		274	1	0.9999999999520871		274	1	0.9999998736478678		274	1	0.9999606743632868			274	1	0.9999998760487517		274	1	0.993764		274	1	0.9946444711261756		274	1	0.999261
275	1	0.9999999999999966		275	1	0.9999999999891448		275	1	0.999999		275	1	0.9999960160899061			275	1	0.9999998948346932		275	1	0.417109		275	1	0.7204301973835716		275	1	0.9641796626705668
276	1	0.9999999999999997		276	1	1		276	1	0.9999999311118764		276	1	1			276	1	0.9999985300701454		276	1	0.916335		276	1	0.9974183195128538		276	1	0.9966204452916503
277	1	0.9999999999999917		277	1	0.9999999999953506		277	1	1		277	1	0.9999998258475365			277	1	0.9999999981329668		277	1	0.987754		277	1	0.9991162885773784		277	1	0.9971753120648851
278	1	0.9999999999966313		278	1	0.9999999757596673		278	1	0.9999998929776799		278	1	0.9999999278367804			278	1	0.9999715528307485		278	1	0.77711		278	1	0.9917600901794763		278	1	0.9985968714384686
279	1	1		279	1	0.9999999999554416		279	1	0.9999998950587962		279	1	0.9999999686166049			279	1	0.9999992621930657		279	1	0.99725		279	1	0.9982875949564565		279	1	0.9987564297564301
280	1	1		280	1	0.9999999999932188		280	1	0.9999999096447296		280	1	0.9999999664964352			280	1	0.9999999065129037		280	1	0.998766		280	1	0.9990773565190252		280	1	0.9955705388576611
281	1	0.9999999999999986		281	1	0.9999999999696615		281	1	0.9999999484527275		281	1	0.9999992477359723			281	1	0.9999996790455973		281	1	0.997336		281	1	0.9989676672911983		281	1	0.9992820329936192
282	1	1		282	1	0.9999999993957615		282	1	0.9999996599689298		282	1	0.9999983624601837			282	1	0.9999990943835929		282	1	0.995713		282	1	0.9995350421100796		282	1	0.999578
283	1	1		283	1	0.9999999999780554		283	1	0.9999998115958622		283	1	0.9999999484627783			283	1	0.9999987757767234		283	1	0.954998		283	1	0.9942887698236687		283	1	0.9909015964307251
284	1	0.9999999999999997		284	1	0.9999644159977285		284	1	0.9999915907999928		284	1	1			284	1	0.9776821205944269		284	1	0.310971		284	1	0.5768435411268372		284	1	0.7990224189867698
285	1	1		285	1	0.9999999995877994		285	1	0.9999987821836522		285	1	0.999999			285	1	0.9999999320050958		285	1	0.884544		285	1	0.9879579288232909		285	1	0.9594884067316012
286	1	1		286	1	0.9999999988124365		286	1	0.9999986749214613		286	1	0.9999815785471228			286	1	0.9999588052180952		286	1	0.944133		286	1	0.9962863476709918		286	1	0.9412741931255989
287	1	1		287	1	0.9999999999923009		287	1	0.9999998927161571		287	1	0.9999975798386752			287	1	0.9999999424353194		287	1	0.99498		287	1	0.9950840702427863		287	1	0.9974497415987874
288	1	1		288	1	0.9999999999516125		288	1	1		288	1	0.9999998432036553			288	1	0.9999998909504155		288	1	0.987424		288	1	0.9992687192365006		288	1	0.99785
289	1	1		289	1	1		289	1	0.9999999918166703		289	1	0.9999999822591463			289	1	0.999997		289	1	0.994767		289	1	0.9994105298023978		289	1	0.999156
290	1	0.9999999999999997		290	1	0.9999999999228443		290	1	0.9999991845080185		290	1	0.9999969820907858			290	1	0.9999999999965634		290	1	0.578665		290	1	0.4198914527204213		290	1	0.2540909363735706
291	1	1		291	1	0.9999999999928265		291	1	0.999996		291	1	0.9999988547427381			291	1	0.9999994344829731		291	1	0.978316		291	1	0.9961068550167334		291	1	0.9997213983972371
292	1	0.9999999999999993		292	1	0.9999999999966668		292	1	0.9999999479245474		292	1	0.9999983537915237			292	1	0.9999976988536032		292	1	0.986135		292	1	0.9975025166593855		292	1	0.9969606824024457
293	1	0.9999999999999979		293	1	0.9999999700388285		293	1	0.9999949966491435		293	1	0.9999998380083787			293	1	0.7437597449075649		293	1	0.249889		293	1	0.11466653302604468		293	1	0.4236995211686586
294	1	0.9999999999999951		294	1	0.9999999999771142		294	1	0.9999998027508812		294	1	0.9999989918287789			294	1	0.9999977824770143		294	1	0.885938		294	1	0.996263		294	1	0.9993782035188381
295	1	1		295	1	0.9999999999972415		295	1	1		295	1	0.9999999513797856			295	1	0.9999993858544435		295	1	0.991345		295	1	0.9993331343940481		295	1	0.99943
296	1	1		296	1	0.9999999999959868		296	1	0.9999998566900214		296	1	0.9999991016838553			296	1	0.999999		296	1	0.989805		296	1	0.9994269444407325		296	1	0.998873
297	1	1		297	1	0.9999999997359554		297	1	0.9999974896422333		297	1	0.9999968507075893			297	1	1		297	1	0.984108		297	1	0.9967240222716766		297	1	0.9987999221926118
298	1	1		298	1	0.9999999999996096		298	1	0.9999999746699054		298	1	0.9999999523437524			298	1	0.9999971508005885		298	1	0.993678		298	1	0.9980597057991335		298	1	0.9993421061813575
299	1	0.9999999999999997		299	1	0.9999999999778403		299	1	0.9999997617214904		299	1	0.999999			299	1	0.9999991210881375		299	1	0.964719		299	1	0.9957943897606364		299	1	0.9990287376279857
300	1	1		300	1	0.9999999891485934		300	1	0.9999998690446631		300	1	0.9998289641216797			300	1	0.9999821353432826		300	1	0.221262		300	1	0.38271653693724894		300	1	0.7457813564065676
301	1	1		301	1	0.9999999064894239		301	1	0.9999999706370716		301	1	0.9999998467479321			301	1	0.9997110549253417		301	1	0.961804		301	1	0.9975335154995807		301	1	0.9971944913541443
302	1	1		302	1	1		302	1	0.9999999992916233		302	1	0.9999999682720009			302	1	0.9999767912280962		302	1	0.954021		302	1	0.998014		302	1	0.9982466729162635
303	1	1		303	1	0.9999998692617971		303	1	0.9999511270496273		303	1	0.9999699234645957			303	1	0.9999999881193109		303	1	0.418049		303	1	0.7120042553746193		303	1	0.36354139165468846
304	1	1		304	1	0.999997		304	1	0.9999953827932728		304	1	0.9999620931133575			304	1	0.9999999152400629		304	1	0.903943		304	1	0.9966311488366899		304	1	0.9928654479331989
305	1	1		305	1	0.9999999710055468		305	1	0.9999996655835184		305	1	0.9999429045538232			305	1	0.9957720062922506		305	1	0.0831529		305	1	0.13380761579345307		305	1	0.0915423
306	1	1		306	1	0.9999999999952002		306	1	0.999999		306	1	0.9999998478318723			306	1	0.9923802219651832		306	1	0.930611		306	1	0.9996949549526388		306	1	0.997081
307	1	1		307	1	0.5417324639669621		307	1	0.37701801341087915		307	1	0.3070158744720519			307	1	0.6735953092754899		307	1	0.861497		307	1	0.9209048613413603		307	1	0.7684906371353586
308	1	1		308	1	0.9999999999998671		308	1	0.9999999956283516		308	1	0.9999999308774865			308	1	0.9999764840002395		308	1	0.833985		308	1	0.9933581129107858		308	1	0.9906523790739833
309	1	0.9999999999999414		309	1	0.9999999999994652		309	1	0.9999999728489457		309	1	1			309	1	0.9999999929791772		309	1	0.852996		309	1	0.9986037200697784		309	1	0.9957967069475129
310	1	0.9999999999999982		310	1	0.9999999999997491		310	1	0.9999999841292635		310	1	0.9999996116914001			310	1	0.9999999997717237		310	1	0.996371		310	1	0.999585		310	1	0.9988483711332048
311	1	0.9999999999999966		311	1	0.9999999999982956		311	1	0.9999999647318323		311	1	0.9999999560008375			311	1	0.9999999999075017		311	1	0.994064		311	1	0.9986937244417768		311	1	0.9985400559767099
312	1	0.9999999999999997		312	1	0.9999999472090688		312	1	0.9999998907188384		312	1	0.999997			312	1	0.9999995265377091		312	1	0.974039		312	1	0.9932287201834641		312	1	0.9970608641511105
313	1	1		313	1	0.9999999999999322		313	1	0.9999999969896515		313	1	0.9999999595808413			313	1	0.9999999129120292		313	1	0.998225		313	1	0.9991803606052863		313	1	0.9987697104081518
314	1	0.9999999999999993		314	1	0.999998		314	1	0.9991914398801619		314	1	0.9999738715329116			314	1	0.9999999501816779		314	1	0.512654		314	1	0.9363322158318664		314	1	0.9557884546878099
315	1	1		315	1	0.9999999760796016		315	1	1		315	1	0.999976			315	1	0.9476714637766617		315	1	0.678261		315	1	0.9432789987422863		315	1	0.9951797506017472
316	1	1		316	1	0.9999999998739508		316	1	0.9999998789079719		316	1	0.9999990770173691			316	1	0.9591396453057204		316	1	0.882037		316	1	0.9989986740222606		316	1	0.9946140808200381
317	1	1		317	1	0.9999999623051121		317	1	0.9999959361087788		317	1	0.9998726059042461			317	1	0.9631949251587114		317	1	0.908972		317	1	0.9844366547610616		317	1	0.9971462984230794
318	1	1		318	1	0.9999999888019185		318	1	0.9999986640556522		318	1	0.9999748411891551			318	1	0.9702043315727639		318	1	0.68471		318	1	0.9773213950523096		318	1	0.9862837948589341
319	1	1		319	1	0.9999999452384669		319	1	0.9999993073130711		319	1	0.9998933954391179			319	1	0.9941012974616469		319	1	0.889127		319	1	0.9769467903582032		319	1	0.9981711188957425
320	1	1		320	1	0.9999999762343448		320	1	0.9998501044447738		320	1	0.9999237950664499			320	1	0.9999277693336514		320	1	0.75545		320	1	0.9939347589953353		320	1	0.990807
321	1	1		321	1	0.9999992377067561		321	1	0.9999977257318345		321	1	0.9998898329204231			321	1	0.9999441508132726		321	1	0.605735		321	1	0.9907292177288292		321	1	0.9979194232275853
322	1	1		322	1	0.9999999998946489		322	1	0.9999999862595916		322	1	0.9999579347580906			322	1	0.9999999964264451		322	1	0.524351		322	1	0.883048		322	1	0.48664136111230777
323	1	1		323	1	0.9999999995900023		323	1	0.9999998664002162		323	1	0.9999994157778824			323	1	0.9821709329321402		323	1	0.932124		323	1	0.9990538520935466		323	1	0.9968691732901724
324	1	0.9999936418077109		324	1	0.9999382071937044		324	1	0.9997240460728308		324	1	0.9998382535189971			324	1	0.4704244066879796		324	1	0.528505		324	1	0.46605283425688876		324	1	0.4352803967616727
325	1	1		325	1	0.9999999999979268		325	1	0.9999999196297416		325	1	0.9999972768987776			325	1	0.9999999981601981		325	1	0.939393		325	1	0.9973084971295807		325	1	0.9956455494672793
326	1	1		326	1	0.9999990532015495		326	1	0.9999998563212085		326	1	0.9999993668230586			326	1	0.9992694714897264		326	1	0.314137		326	1	0.911229		326	1	0.9899691903129705
327	1	1		327	1	0.9999999999985016		327	1	0.9999999791341831		327	1	0.9999995215508344			327	1	0.9998906427690807		327	1	0.82283		327	1	0.9995778059989375		327	1	0.9979064129792963
328	1	0.9999999999999061		328	1	1		328	1	0.9999953200423608		328	1	0.9999975377412105			328	1	0.9804466827286474		328	1	0.957034		328	1	0.9986422179229224		328	1	0.9980506807519707
329	1	1		329	1	0.9999999999989947		329	1	0.9999999616731219		329	1	0.999999			329	1	0.9999999991879083		329	1	0.958649		329	1	0.9977976112128946		329	1	0.9932619126992875
330	1	1		330	1	0.9999999999993584		330	1	0.999999		330	1	0.9999994826655507			330	1	0.9997655765095034		330	1	0.439334		330	1	0.9287010896975674		330	1	0.9749087608777213
331	1	1		331	1	0.9999999999999989		331	1	0.9999998273095623		331	1	0.9999997349823767			331	1	0.9980691569326156		331	1	0.476994		331	1	0.9797867974561398		331	1	0.9946012200259791
332	1	1		332	1	0.9999999999999112		332	1	0.9999999493986952		332	1	0.9999984215549992			332	1	0.9958475420499262		332	1	0.316866		332	1	0.8591370945564475		332	1	0.9750478871830648
333	1	1		333	1	0.9999999999985011		333	1	0.9999999998385997		333	1	0.9999999198698879			333	1	0.9999968695805221		333	1	0.934563		333	1	0.9980046648237575		333	1	0.9978444077173064
334	1	1		334	1	0.9999999999999872		334	1	0.9999999999460671		334	1	0.9999999903959219			334	1	0.9999278385820554		334	1	0.997743		334	1	0.9992768079220548		334	1	0.9993043809953438
335	1	1		335	1	0.9999999999995289		335	1	0.9999999998648587		335	1	0.9999999996299339			335	1	0.9999597594959747		335	1	0.997554		335	1	0.9993882215243602		335	1	0.9994076432146363
336	1	1		336	1	0.9999999999999537		336	1	0.9999999999702007		336	1	0.9999999810434727			336	1	0.9999991746862439		336	1	0.998199		336	1	0.9992937472511285		336	1	0.9992176184890287
337	1	1		337	1	0.9999999999999041		337	1	0.9999999999485363		337	1	0.9999998798844657			337	1	0.9999991290627058		337	1	0.946928		337	1	0.9982680309311498		337	1	0.9973712946357326
338	1	1		338	1	0.9999999999905472		338	1	1		338	1	0.9999999757254477			338	1	0.9999990073220604		338	1	0.642333		338	1	0.9779871136256493		338	1	0.9925713787279055
339	1	1		339	1	0.9999999999999929		339	1	0.9999999999757454		339	1	0.9999999839305356			339	1	0.9998773854322681		339	1	0.996164		339	1	0.9991048932208527		339	1	0.9994555067870298
340	1	1		340	1	0.9999999999997807		340	1	0.9999999999851831		340	1	0.9999999341236704			340	1	0.9999667304369134		340	1	0.994246		340	1	0.9993453707120568		340	1	0.9992681277346992
341	1	1		341	1	0.9999999999999927		341	1	0.9999999999624276		341	1	0.9999999985111688			341	1	0.9991111256032397		341	1	0.970763		341	1	0.9987525970756049		341	1	0.9991250701721264
342	1	1		342	1	0.9999999674928639		342	1	0.9999993968896731		342	1	0.9999789671570218			342	1	0.9976829049172172		342	1	0.913387		342	1	0.9955400169177807		342	1	0.9978760076719863
343	1	1		343	1	0.9999999999997787		343	1	1		343	1	1			343	1	0.9999580776926479		343	1	0.99174		343	1	0.999524		343	1	0.9992745913051541
344	1	1		344	1	0.9999999999999998		344	1	0.9999999998519054		344	1	0.9999999983865094			344	1	0.9988320907706372		344	1	0.963793		344	1	0.9989063815707435		344	1	0.9989722229193451
345	1	1		345	1	1		345	1	0.9999999999961307		345	1	0.9999999461196938			345	1	0.9999998993646644		345	1	0.992777		345	1	0.9983399405905146		345	1	0.9957441957970612
346	1	1		346	1	0.9999999999970803		346	1	1		346	1	0.9999999998987553			346	1	0.999959		346	1	0.99351		346	1	0.9991924257921533		346	1	0.9991449006731117
347	1	1		347	1	0.9999999999992263		347	1	0.9999999999692317		347	1	0.9999983857477263			347	1	0.9999999489643888		347	1	0.919945		347	1	0.9975925652127621		347	1	0.9959671509978576
348	1	1		348	1	0.9999999999993822		348	1	0.9999999975094718		348	1	1			348	1	0.9997434342651157		348	1	0.552168		348	1	0.34858077536057197		348	1	0.2908954114804318
349	1	1		349	1	0.9999999999999972		349	1	0.9999999999672459		349	1	0.9999999996020102			349	1	0.9994647526344791		349	1	0.969943		349	1	0.998845		349	1	0.9990862774584621
350	1	1		350	1	0.9999999999999207		350	1	0.9999999984136175		350	1	0.9999990253370258			350	1	0.9999713796441366		350	1	0.801659		350	1	0.9927426181956412		350	1	0.9892757368417092
351	1	1		351	1	0.9999999999992664		351	1	0.9999999999166076		351	1	0.9999999981012142			351	1	0.9998783644051754		351	1	0.989183		351	1	0.9989586601243537		351	1	0.9993658099070164
352	1	1		352	1	0.9999999999999875		352	1	0.9999999999866535		352	1	0.9999999977141901			352	1	0.9999999773348772		352	1	0.998986		352	1	0.998911		352	1	0.9985319318681821
353	1	1		353	1	0.9999999999978121		353	1	0.9999999999674649		353	1	0.9999999482527924			353	1	0.9998519220872877		353	1	0.90327		353	1	0.9980635884970412		353	1	0.9986010040810808
354	1	1		354	1	1		354	1	0.9999999999892203		354	1	0.9999999954990298			354	1	0.999891		354	1	0.997704		354	1	0.9990453194154902		354	1	0.9994129206730209
355	1	0.9999999999999997		355	1	0.9999999999999314		355	1	0.9999999906101034		355	1	0.9999988941662971			355	1	0.9999062815267028		355	1	0.999975		355	1	0.9985278648958914		355	1	0.997353
356	1	0.9999999649047633		356	1	0.9999999989754992		356	1	0.9999978330632191		356	1	0.9999922031467633			356	1	0.9999389913234017		356	1	0.989882		356	1	0.9368450522326435		356	1	0.9677999099330122
357	1	0.9999999965192197		357	1	0.9999999647030363		357	1	0.9999955293297009		357	1	0.9999992245000655			357	1	0.9473143807218513		357	1	0.992002		357	1	0.9996916719668485		357	1	0.9977706495915828
358	1	1		358	1	0.9999999999999477		358	1	0.9999999385237007		358	1	0.9999998978052513			358	1	0.9999921269654883		358	1	0.999917		358	1	0.9994451591392195		358	1	0.9995629189308028
359	1	0.9999999279205152		359	1	0.9999999999321052		359	1	0.9999993214956436		359	1	0.9999977883889697			359	1	0.999996		359	1	0.993706		359	1	0.994906		359	1	0.9846194589608206
360	1	1		360	1	0.9999999999999191		360	1	0.9999999878907525		360	1	0.9999965994748802			360	1	0.9999507787990178		360	1	0.999983		360	1	0.9994689836928801		360	1	0.9987740714515128
361	1	0.9999999852221906		361	1	0.9999999996753935		361	1	0.9999958513712087		361	1	0.999985			361	1	0.999995		361	1	0.983861		361	1	0.9945384237697532		361	1	0.9931455066961896
362	1	0.9999999913600067		362	1	0.9999999956709253		362	1	0.9999928586220097		362	1	0.9995314919387323			362	1	0.9999863956884595		362	1	0.848341		362	1	0.9790506105631931		362	1	0.9954741762599856
363	1	0.9999999999469967		363	1	0.9999999853348972		363	1	0.9999981181649666		363	1	0.9999901009863322			363	1	0.9992258226527576		363	1	0.866149		363	1	0.9792416952953633		363	1	0.9841990073632628
364	1	0.9999999945525755		364	1	0.9999999998831999		364	1	0.999997		364	1	0.9999931127784497			364	1	0.999997		364	1	0.784876		364	1	0.44629158264944235		364	1	0.6643067612413323
365	1	1		365	1	0.9999999999999981		365	1	0.9999999895054046		365	1	0.9999999964694802			365	1	0.9999986832638995		365	1	0.999914		365	1	0.9988616286699633		365	1	0.9991492036702471
366	1	1		366	1	0.9999999999999196		366	1	1		366	1	0.9999999899697092			366	1	0.9999977689947652		366	1	0.999337		366	1	0.9989191371053646		366	1	0.998658
367	1	0.9999999999998921		367	1	0.9999999970261617		367	1	0.9999919892321218		367	1	0.999997			367	1	0.9998097931987867		367	1	0.933172		367	1	0.9127621705851576		367	1	0.7220647911276958
368	1	1		368	1	0.9999999999999886		368	1	0.9999999974214893		368	1	0.9999996608724904			368	1	0.9999405024343757		368	1	0.999965		368	1	0.9993769545452058		368	1	0.9998143433782629
369	1	1		369	1	0.9999999999999998		369	1	0.9999999288096505		369	1	0.9999999916444173			369	1	0.9999998044239408		369	1	1		369	1	0.9999278906483927		369	1	0.9993765298079402
370	1	1		370	1	0.9999999999999987		370	1	0.9999999905659482		370	1	0.9999999958714195			370	1	0.9999983908684137		370	1	0.999966		370	1	0.9991332723135609		370	1	0.9993966296850635
371	1	1		371	1	0.9999999999990385		371	1	0.9999999917766415		371	1	0.999997			371	1	0.9995991670495586		371	1	0.999884		371	1	0.9991072270046809		371	1	0.9994011784238258
372	1	1		372	1	0.9999999999993295		372	1	0.9999999067698733		372	1	0.9999997295896643			372	1	0.999729		372	1	0.99992		372	1	0.9998729706484967		372	1	0.9997412514216714
373	1	1		373	1	0.9999999999989094		373	1	0.9999988666732281		373	1	0.9999985290432787			373	1	0.9999992922310414		373	1	0.998541		373	1	0.9975148694839379		373	1	0.9886902251014473
374	1	0.9999999949933351		374	1	0.9999999895887556		374	1	0.9999965132546562		374	1	0.9999820178567382			374	1	0.9885611237945916		374	1	0.551665		374	1	0.9035829774221242		374	1	0.8216575827090432
375	1	1		375	1	0.9999999999999738		375	1	0.9999999985078816		375	1	0.9999999882291299			375	1	0.9999901713226996		375	1	0.998379		375	1	0.9996934624918041		375	1	0.9974372598263219
376	1	0.9999999949928002		376	1	0.9999999998450919		376	1	0.9999958697190794		376	1	0.9999903999552099			376	1	0.9999870132405678		376	1	0.924017		376	1	0.9778988520089926		376	1	0.9775521637189418
377	1	1		377	1	0.9999999999999665		377	1	0.9999999637717646		377	1	0.9999999485687296			377	1	0.9999976687043132		377	1	0.999905		377	1	0.9986875340108821		377	1	0.9987053635596613
378	1	1		378	1	0.9999999999999981		378	1	0.9999999201760793		378	1	0.9999999893759407			378	1	0.9999785110049654		378	1	0.999975		378	1	0.9990060631524232		378	1	0.9989352633713847
379	1	0.9999999969321701		379	1	0.9999996485101943		379	1	0.9998556671062063		379	1	0.9998547843306678			379	1	0.9986144573389786		379	1	0.498873		379	1	0.5111623476711981		379	1	0.5122434638920099
380	1	0.9999999784489882		380	1	0.9999999995067045		380	1	0.9999970587804511		380	1	0.9999911583268601			380	1	0.9999910939644707		380	1	0.982414		380	1	0.9961747833080664		380	1	0.9952549428248898
381	1	1		381	1	0.9999999999982367		381	1	0.999996		381	1	0.9999998472628533			381	1	0.9996994474065248		381	1	0.999306		381	1	0.9983837015713211		381	1	0.9991460055075765
382	1	0.9999999852199926		382	1	0.9999999954634482		382	1	0.9999924591220424		382	1	0.9999722489574101			382	1	0.9995805575435105		382	1	0.994202		382	1	0.9914539124867022		382	1	0.9845309701546195
383	1	1		383	1	0.9999999999999449		383	1	0.9999999978668342		383	1	0.9999991006873414			383	1	0.9999275967461239		383	1	0.999623		383	1	0.9994742869638631		383	1	0.9996479675043967
384	1	0.9999999998120345		384	1	0.999999		384	1	0.9997943856800211		384	1	0.9999161655031953			384	1	0.9999563227466947		384	1	0.995383		384	1	0.9732835008610561		384	1	0.9800625458251506
385	1	1		385	1	0.9999999999999916		385	1	0.9999999449064172		385	1	0.9999999980766677			385	1	0.9999941909685397		385	1	0.99937		385	1	0.9998555596177965		385	1	0.9994206716171734
386	1	0.9999999987234028		386	1	0.9999999996947613		386	1	0.9999970526905146		386	1	0.9999954011634263			386	1	0.9999760750051868		386	1	0.993925		386	1	0.9941523856003598		386	1	0.9895055137786449
387	1	0.9999984438768666		387	1	0.9999999999980986		387	1	0.9999999551034977		387	1	0.9999997334771475			387	1	0.9999952256255669		387	1	0.974091		387	1	0.969441		387	1	0.9702919790507621
388	1	0.9999999789106723		388	1	0.9999968008909762		388	1	0.9999863470976956		388	1	0.9999240683087987			388	1	0.9998922770476795		388	1	0.925024		388	1	0.9877361389684776		388	1	0.9921211613223382
389	1	1		389	1	0.9999999999999992		389	1	0.9999999757648428		389	1	0.9999999575435857			389	1	0.999995		389	1	0.99999		389	1	0.9995662069091414		389	1	0.9990942302689835
390	1	1		390	1	0.9999999999998619		390	1	0.9999999969912382		390	1	0.9999996200136717			390	1	0.9997028004724087		390	1	0.998632		390	1	0.9992834167084995		390	1	0.9996792656082938
391	1	1		391	1	0.9999999999981957		391	1	0.9999999811112927		391	1	0.9999996595481667			391	1	0.9998661154982323		391	1	0.999813		391	1	0.9993180174972724		391	1	0.999607
392	1	1		392	1	0.9999999999999872		392	1	0.9999999119898085		392	1	0.9999999406847914			392	1	0.9999997125765697		392	1	0.999982		392	1	0.99987		392	1	0.9992457939072886
393	1	1		393	1	0.9999999999992151		393	1	0.9999999868699485		393	1	0.9999980430220474			393	1	0.9999640843930016		393	1	0.99982		393	1	0.9988057520519485		393	1	0.9985026715383484
394	1	1		394	1	0.9999999999871685		394	1	0.9999999893389763		394	1	0.9999991712088512			394	1	0.9999989867693789		394	1	0.999733		394	1	0.9998383469052171		394	1	0.9980190227893897
395	1	1		395	1	0.9999999999903285		395	1	0.9999969931291944		395	1	0.9999994153306287			395	1	0.9998221033349977		395	1	0.999554		395	1	0.9979546031942914		395	1	0.9991373301039275
396	1	0.9999999987969455		396	1	0.9999999999308716		396	1	0.9999967705569787		396	1	0.999996			396	1	0.9999360899135559		396	1	0.988524		396	1	0.983841		396	1	0.9888561377714883
397	1	0.9999999999113339		397	1	0.9996541319419823		397	1	0.9994001213508193		397	1	0.998698			397	1	0.9999530565927273		397	1	0.806535		397	1	0.8085326858313739		397	1	0.8817816789389079
398	1	0.9999999921106868		398	1	0.9999999991898535		398	1	0.9999977092275149		398	1	0.9999925870286549			398	1	0.9999834426247624		398	1	0.98272		398	1	0.9919997148675118		398	1	0.9866499625563104
399	1	0.9999960683737571		399	1	0.9999999627914699		399	1	0.9999611965932313		399	1	0.9998107107185409			399	1	0.9984438365165822		399	1	0.512255		399	1	0.7016534961313229		399	1	0.6585133677417633
400	1	0.9999999998001187		400	1	0.8162211426891572		400	1	0.9707678709971191		400	1	0.7918270317004731			400	1	0.9917600710000393		400	1	0.147776		400	1	0.10031266560248607		400	1	0.17428722273961697
401	1	1		401	1	0.9999999919383603		401	1	0.9999996534710445		401	1	0.9999998847445618			401	1	1		401	1	0.859715		401	1	0.7616935703465095		401	1	0.9841769698099379
402	1	1		402	1	0.9999999974457857		402	1	0.9999997719157392		402	1	0.9999999493254785			402	1	0.9996440783959802		402	1	0.844071		402	1	0.9327762047071865		402	1	0.9584891328688326
403	1	1		403	1	0.9999999510226829		403	1	0.9999996654684122		403	1	0.9999999168419929			403	1	0.991868		403	1	0.258699		403	1	0.4347199695312618		403	1	0.6424928551406864
404	1	1		404	1	0.9999999999999998		404	1	0.9999999999997181		404	1	0.9999999999999698			404	1	0.999994		404	1	0.97832		404	1	0.9961572652389497		404	1	0.9991972551098302
405	1	1		405	1	0.9999999999999992		405	1	0.9999999970561173		405	1	0.9999999998774157			405	1	0.9999767332624943		405	1	0.880764		405	1	0.9960351848579652		405	1	0.9945044463756433
406	1	0.9998585894748923		406	1	0.8770272704470093		406	1	0.7933705187243723		406	1	0.8349416412865016			406	1	0.8014495765350139		406	1	0.42008		406	1	0.9392608167696611		406	1	0.9635769782924767
407	1	1		407	1	1		407	1	0.9999999132239201		407	1	0.9999999999368259			407	1	0.999999		407	1	0.955259		407	1	0.9970500698136265		407	1	0.9952278229683273
408	1	1		408	1	0.9999999998656293		408	1	1		408	1	0.9999995105183807			408	1	0.9999113007911455		408	1	0.983477		408	1	0.9778817331593492		408	1	0.9943443168681563
409	1	1		409	1	0.9999999999942649		409	1	0.9999999372576551		409	1	1			409	1	0.9999611262329445		409	1	0.788276		409	1	0.7689554679157837		409	1	0.9799861441201156
410	1	1		410	1	1		410	1	0.9999999660061987		410	1	0.9999126944691558			410	1	0.9999995224140537		410	1	0.756277		410	1	0.8408980931474985		410	1	0.9145326945313887
411	1	1		411	1	0.8638248548871563		411	1	0.9715871204616195		411	1	0.9999464949484916			411	1	0.9999969565616236		411	1	0.403179		411	1	0.5111664046565899		411	1	0.2809153300641339
412	1	1		412	1	0.9999999984831524		412	1	0.9999989603505802		412	1	0.9999999580220825			412	1	0.999464		412	1	0.948442		412	1	0.9744665574199415		412	1	0.9949349523585228
413	1	1		413	1	1		413	1	0.9999999923123434		413	1	0.9999592306814415			413	1	0.9999974593339122		413	1	0.394798		413	1	0.8336581385274856		413	1	0.9446266291424957
414	1	1		414	1	0.9999999999933454		414	1	0.9999999986476087		414	1	0.9997956755038687			414	1	0.999998		414	1	0.471899		414	1	0.6192335808868673		414	1	0.5822197699551863
415	1	1		415	1	0.9999999999096622		415	1	0.9999999420297105		415	1	0.9998752312958026			415	1	0.999845		415	1	0.477313		415	1	0.5544490997006174		415	1	0.945346
416	1	1		416	1	0.9999999059516834		416	1	0.9999999918195315		416	1	0.9999999091740178			416	1	0.9999976202757463		416	1	0.640549		416	1	0.6537319614555017		416	1	0.845923
417	1	1		417	1	0.9999999999908082		417	1	0.9999999986893197		417	1	0.999997			417	1	0.9999998089459265		417	1	0.594441		417	1	0.9355688963046243		417	1	0.7755278842431015
418	1	1		418	1	0.9999995524611759		418	1	0.9999993934853373		418	1	0.9999999707390341			418	1	0.9999995837243834		418	1	0.476223		418	1	0.8815603991630002		418	1	0.895286
419	1	1		419	1	0.9999048108747333		419	1	0.9376078635206933		419	1	0.9436042182831145			419	1	0.9352286116702229		419	1	0.521197		419	1	0.9456403880380567		419	1	0.7073490758221463
420	1	1		420	1	0.9999958585888785		420	1	0.9980985287978851		420	1	0.9999919812800234			420	1	0.9958930180133776		420	1	0.74076		420	1	0.8079003348211807		420	1	0.9403377880151425
421	1	1		421	1	0.9913796383710961		421	1	0.9995332248784594		421	1	0.9965928279572586			421	1	0.9955808456375745		421	1	0.373781		421	1	0.1637303616250764		421	1	0.11036348152004964
422	1	1		422	1	0.9999629736900141		422	1	0.999993		422	1	0.9999726972072629			422	1	0.9994748960464689		422	1	0.377639		422	1	0.7857368757216244		422	1	0.8162790951936258
423	1	0.9999999970336235		423	1	0.8587502150964494		423	1	0.6472782613683097		423	1	0.9211345345409537			423	1	0.9284150044429386		423	1	0.273221		423	1	0.5309079425549883		423	1	0.9272611748617609
424	1	1		424	1	0.9999993392128336		424	1	0.9997394085155249		424	1	0.9998071702149582			424	1	0.9999999940589341		424	1	0.415586		424	1	0.5027313337417918		424	1	0.7945118565572918
425	1	1		425	1	0.9999927491277482		425	1	0.9999995199374985		425	1	0.9999920920752197			425	1	0.7281472266835123		425	1	0.870976		425	1	0.9727324105202676		425	1	0.9569137975646212
426	1	0.9999999999998352		426	1	0.9870192963886566		426	1	0.3147869207905482		426	1	0.6898574610848883			426	1	0.999796		426	1	0.640977		426	1	0.7144280699618538		426	1	0.9467638076847507
427	1	1		427	1	0.9999942109334027		427	1	0.9967170864665881		427	1	0.9999939391381996			427	1	0.9964736961272757		427	1	0.737979		427	1	0.8238331251481664		427	1	0.9357207491358158
428	1	1		428	1	0.9999983497114129		428	1	0.9999447443802822		428	1	0.9999062829693212			428	1	0.9963715839292581		428	1	0.761787		428	1	0.7439871797898232		428	1	0.8925419050952764
429	1	1		429	1	0.9993209025931492		429	1	0.5784949505509688		429	1	0.9989066396493095			429	1	0.9994932118046789		429	1	0.52436		429	1	0.4841811863489542		429	1	0.779019
430	1	1		430	1	1		430	1	0.9999998746566549		430	1	0.9999745487512294			430	1	0.7670414533418756		430	1	0.912111		430	1	0.9901889704210571		430	1	0.9657796678896462
431	1	1		431	1	0.9999999999922835		431	1	0.9999973212756645		431	1	0.9999947916398396			431	1	0.9888279856914334		431	1	0.887251		431	1	0.9469626613045847		431	1	0.980746
432	1	1		432	1	0.9999999999693345		432	1	0.9999989559139535		432	1	0.9999983441717467			432	1	0.9999939523857767		432	1	0.735239		432	1	0.9744093362496561		432	1	0.7204708434527087
433	1	1		433	1	0.9999999999938236		433	1	0.9999998768781019		433	1	0.9999693691242848			433	1	0.999529		433	1	0.638669		433	1	0.9318021897151644		433	1	0.9863582656595058
434	1	1		434	1	0.9999999925114471		434	1	0.9999271326393812		434	1	0.9999981325075523			434	1	0.9999999999096586		434	1	0.96712		434	1	0.4513078288501447		434	1	0.6728026029980956
435	1	1		435	1	0.9999999999837939		435	1	0.9999741605745376		435	1	0.9999984246112542			435	1	0.9990585368697592		435	1	0.912327		435	1	0.944988		435	1	0.9950808325123964
436	1	1		436	1	0.9999999998576706		436	1	0.9999994300489401		436	1	0.9999927469507962			436	1	0.9999728032360653		436	1	0.847737		436	1	0.9230195247169014		436	1	0.9937186240390686
437	1	1		437	1	0.9999999999985468		437	1	0.9999933618210854		437	1	0.9999995880671649			437	1	0.9999994608011086		437	1	0.941741		437	1	0.9602793434217879		437	1	0.9885543719171087
438	1	1		438	1	0.9999801173418424		438	1	0.9999981257591435		438	1	0.9999947638062245			438	1	0.9999967847588165		438	1	0.654182		438	1	0.9412774071236464		438	1	0.9654557682130366
439	1	1		439	1	0.9999999999477281		439	1	0.9999999995077236		439	1	0.9999961433384923			439	1	0.9994785334923012		439	1	0.201651		439	1	0.6854255758692747		439	1	0.9655773197392669
440	1	1		440	1	0.9999999999555704		440	1	0.9999986682977591		440	1	1			440	1	0.9999840480225319		440	1	0.934963		440	1	0.9487195746088802		440	1	0.9620703729069743
441	1	1		441	1	0.9999999999987351		441	1	0.9999998611028893		441	1	0.9999985297024159			441	1	0.9999217734330246		441	1	0.974384		441	1	0.9728567114540831		441	1	0.9958391174590314
442	1	1		442	1	0.9999999999960009		442	1	0.9999838170875641		442	1	0.9999681437117687			442	1	0.9935226175644365		442	1	0.928633		442	1	0.9451125905854632		442	1	0.9875172902658745
443	1	1		443	1	0.9999999999999863		443	1	0.9999999993190722		443	1	1			443	1	0.8107861980286069		443	1	0.520434		443	1	0.9390679687232828		443	1	0.986367
444	1	1		444	1	1		444	1	1		444	1	0.9999999909501323			444	1	0.9994151659194546		444	1	0.983127		444	1	0.8218971310093772		444	1	0.9979331930758603
445	1	1		445	1	0.9999999998207328		445	1	1		445	1	0.9999999989204267			445	1	0.9989040971213357		445	1	0.690333		445	1	0.934927		445	1	0.9451903124914767
446	1	1		446	1	0.9999999999999237		446	1	0.9999985633365303		446	1	0.9999888775549433			446	1	0.9999945758730906		446	1	0.375733		446	1	0.9630455111705247		446	1	0.9560146443030499
447	1	1		447	1	0.9999999999981714		447	1	0.9999999881568405		447	1	0.9999999993834683			447	1	0.999992		447	1	0.831325		447	1	0.9846090972738293		447	1	0.9905944006738568
448	1	1		448	1	0.9999999999995756		448	1	0.9999999994010369		448	1	0.9999999999997274			448	1	0.999062		448	1	0.961136		448	1	0.983827		448	1	0.9989326216084666
449	1	1		449	1	0.9999999995035636		449	1	0.9999999948862369		449	1	1			449	1	0.999977		449	1	0.819986		449	1	0.9667007518009554		449	1	0.993571
450	1	1		450	1	0.9999999998856144		450	1	0.9999999936179084		450	1	0.9999998273668713			450	1	0.9999922118227792		450	1	0.961823		450	1	0.9977426495804813		450	1	0.9994002683028989
451	1	1		451	1	0.9999999999917332		451	1	0.999966		451	1	0.999999			451	1	0.4533869097125842		451	1	0.515452		451	1	0.567546		451	1	0.6277594351682501
452	1	1		452	1	0.9999999999999932		452	1	0.9999999996644339		452	1	1			452	1	0.9983355024972493		452	1	0.600527		452	1	0.8795051209482773		452	1	0.9948578767615798
453	1	1		453	1	0.9999999999979161		453	1	0.9999998963697103		453	1	0.9999999995150937			453	1	0.9999247387704496		453	1	0.287621		453	1	0.6289761726380513		453	1	0.7900519280683954
454	1	1		454	1	0.9999999999999992		454	1	0.9999999837179019		454	1	0.9999999999970313			454	1	0.9987343590341822		454	1	0.937946		454	1	0.9961276192231715		454	1	0.9834623735929489
455	1	1		455	1	0.9999999999999588		455	1	0.9999999999565983		455	1	0.9999999941706778			455	1	0.999945		455	1	0.975818		455	1	0.9985290152270982		455	1	0.9985862314890184
456	1	1		456	1	0.9999999999980949		456	1	0.9999999995973208		456	1	0.9999999841814934			456	1	0.9999980697730199		456	1	0.800772		456	1	0.9492054305290492		456	1	0.9906116946088387
457	1	1		457	1	0.9999999999999852		457	1	1		457	1	0.9999999998089881			457	1	0.9998800427396954		457	1	0.926934		457	1	0.9953474173360015		457	1	0.9985458429438466
458	1	1		458	1	0.9999999999958363		458	1	1		458	1	0.9999999998993175			458	1	0.9881057028625544		458	1	0.541728		458	1	0.3182404952959486		458	1	0.884829
459	1	1		459	1	0.9999999999807243		459	1	0.9996866759304434		459	1	0.9999998120625387			459	1	0.9062987594172888		459	1	0.289756		459	1	0.5640642848267292		459	1	0.8168566846080452
460	1	1		460	1	0.999998		460	1	0.9999955707929323		460	1	0.9999998200597465			460	1	0.9995728151449024		460	1	0.429948		460	1	0.7280279214978824		460	1	0.8394747081794403
461	1	1		461	1	0.9999999999990503		461	1	0.9999999258487967		461	1	0.9999999999841045			461	1	0.9784208882043721		461	1	0.979306		461	1	0.9541921841784897		461	1	0.9855277479422825
462	1	1		462	1	0.9999999999999556		462	1	1		462	1	0.9999999998620689			462	1	0.9998929528609231		462	1	0.904153		462	1	0.9985528841288879		462	1	0.9970906483755041
463	1	1		463	1	0.9999999976668917		463	1	0.9999979196822705		463	1	0.9999999698013368			463	1	0.9998091888147378		463	1	0.263432		463	1	0.6672302130896469		463	1	0.7982424168522689
464	1	1		464	1	0.9999999999992001		464	1	1		464	1	0.9999999999978751			464	1	0.9997484567493984		464	1	0.875499		464	1	0.9949657027045632		464	1	0.9978516604796699
465	1	1		465	1	0.9999999629111066		465	1	0.9999613822041448		465	1	0.9985730714250919			465	1	0.9999971174062603		465	1	0.503945		465	1	0.5455857215829372		465	1	0.6752770729394079
466	1	1		466	1	0.9999999999999785		466	1	0.9999999378183946		466	1	0.9999999873198636			466	1	0.999997		466	1	0.970305		466	1	0.9943528639480393		466	1	0.999118
467	1	1		467	1	0.9999999999999899		467	1	0.9999999857928618		467	1	0.9999999999992835			467	1	0.9699877225901034		467	1	0.978981		467	1	0.9964690545376977		467	1	0.9969517151393579
468	1	1		468	1	0.9999999999999741		468	1	0.9999999679920671		468	1	0.9999999918124626			468	1	0.9949825817143606		468	1	0.432016		468	1	0.922153		468	1	0.9778481982081467
469	1	1		469	1	0.9999999998247526		469	1	0.9999999966887826		469	1	1			469	1	0.9431426514605825		469	1	0.252818		469	1	0.23315427302079636		469	1	0.323382
470	1	1		470	1	1		470	1	0.9999997327880935		470	1	0.9999936667768262			470	1	0.9999998595385371		470	1	0.974032		470	1	0.998311		470	1	0.9988686646487912
471	1	1		471	1	0.9999999999916174		471	1	0.9999999654948869		471	1	0.9999999937376318			471	1	0.9999998863704593		471	1	0.875752		471	1	0.9943197535842903		471	1	0.9988233598274894
472	1	1		472	1	0.9999999999866419		472	1	0.9999999946532282		472	1	0.9999999961361161			472	1	0.9999978988448038		472	1	0.426275		472	1	0.6788997528496318		472	1	0.9522229964458233
473	1	1		473	1	0.9999999999997379		473	1	0.9999999990970297		473	1	1			473	1	0.9999551394856053		473	1	0.686732		473	1	0.9948611757621154		473	1	0.9964181003368235
474	1	1		474	1	0.9999999999999863		474	1	0.9999999999977527		474	1	0.9999999998666466			474	1	0.999929		474	1	0.951041		474	1	0.9914466080169058		474	1	0.9989852201155583
475	1	1		475	1	1		475	1	0.9999999999935769		475	1	0.9999999999993501			475	1	0.9993063120791376		475	1	0.761018		475	1	0.9876474405653466		475	1	0.9990552633036075
476	1	1		476	1	0.9999999999989838		476	1	0.9999789027374822		476	1	0.9999998547905675			476	1	0.9924697524644635		476	1	0.805995		476	1	0.7484058875118678		476	1	0.8587711483576534
477	1	1		477	1	1		477	1	0.9999999998137543		477	1	0.9999999969992731			477	1	0.9991121930269948		477	1	0.983552		477	1	0.8471474440354477		477	1	0.9982081494302445
478	1	1		478	1	0.9999999999999992		478	1	0.9999999995360911		478	1	1			478	1	0.9999885249345919		478	1	0.97482		478	1	0.9843725971571856		478	1	0.9934532472733915
479	1	1		479	1	0.9999999999538802		479	1	0.9999999452642722		479	1	0.9999999998857071			479	1	0.9999996912769148		479	1	0.990179		479	1	0.9900084072409523		479	1	0.9934814016511674
480	1	1		480	1	0.9999999999673018		480	1	0.9999999997574163		480	1	0.9999999967738367			480	1	0.999999		480	1	0.957457		480	1	0.9826388190353091		480	1	0.9980305800228538
481	1	1		481	1	0.9997063613157259		481	1	0.9999450813716924		481	1	0.9999999995265013			481	1	0.9872196711057871		481	1	0.226431		481	1	0.40154338519920585		481	1	0.49143193880264624
482	1	1		482	1	0.9999999999966229		482	1	0.9999935085604483		482	1	0.9999999899409211			482	1	0.9976747784472995		482	1	0.2849		482	1	0.1427369667639296		482	1	0.19169597810630534
483	1	1		483	1	0.9999999999929796		483	1	0.9999993642419482		483	1	0.9999999969553403			483	1	0.9977222305718264		483	1	0.819899		483	1	0.9974591420521869		483	1	0.9817471370232209
484	1	1		484	1	0.9999999999907018		484	1	0.9999999995683195		484	1	0.9999999999717392			484	1	0.9994431443618722		484	1	0.934541		484	1	0.9976052583101166		484	1	0.9992862731698665
485	1	1		485	1	0.9999999999999938		485	1	0.9999999995020885		485	1	1			485	1	0.9999310973636936		485	1	0.875332		485	1	0.988653		485	1	0.9792674358988877
486	1	1		486	1	0.9999999990764321		486	1	0.9999963591716328		486	1	0.9999999973127793			486	1	0.9948529134846804		486	1	0.865693		486	1	0.8680805866700654		486	1	0.9851905530849088
487	1	1		487	1	0.9999999999967155		487	1	0.9999999999274263		487	1	0.9999999999456991			487	1	0.9933123692942449		487	1	0.723256		487	1	0.6251341570321557		487	1	0.978136
488	1	1		488	1	0.9999999999999976		488	1	0.9999999999970839		488	1	0.9999999999956344			488	1	0.9999920365399373		488	1	0.98282		488	1	0.9975286048749926		488	1	0.9994690589026732
489	1	1		489	1	0.9999999999999994		489	1	0.9999999999288306		489	1	1			489	1	0.9990126773432177		489	1	0.725996		489	1	0.9883411531572625		489	1	0.9915058728742954
490	1	1		490	1	0.9999999999999989		490	1	1		490	1	0.9999999999957682			490	1	0.9999998109829162		490	1	0.771179		490	1	0.9207030237821877		490	1	0.9923725923220675
491	1	1		491	1	0.9999999999999994		491	1	0.9999999999960694		491	1	0.9999999999958179			491	1	0.9999710941814395		491	1	0.980411		491	1	0.996806		491	1	0.9994827090233812
492	1	1		492	1	1		492	1	0.9999999570417673		492	1	0.9999999979570506			492	1	0.9999999172031511		492	1	0.941006		492	1	0.9955893319014185		492	1	0.9992087343155384
493	1	1		493	1	0.9999999999985011		493	1	1		493	1	0.9999999982386024			493	1	0.9992722942693145		493	1	0.970426		493	1	0.9748351880655093		493	1	0.9993526509143865
494	1	1		494	1	0.9994278338945841		494	1	0.9999997090402466		494	1	0.9999999998184675			494	1	0.9939601898480767		494	1	0.329983		494	1	0.8747171993040634		494	1	0.6630501301453732
495	1	1		495	1	1		495	1	0.9999999999978654		495	1	0.9999999999840663			495	1	0.9999715525945141		495	1	0.969813		495	1	0.9875965990994454		495	1	0.9972232806209844
496	1	1		496	1	0.9999938908797377		496	1	0.9999999520887587		496	1	0.9999977468475566			496	1	0.9998294907985962		496	1	0.758704		496	1	0.8989814350464388		496	1	0.9608812743732382
497	1	1		497	1	0.9999999999999998		497	1	0.9999999999948519		497	1	0.9999999999843509			497	1	0.9999736898591469		497	1	0.967637		497	1	0.9824700014269386		497	1	0.9965502797315967
498	1	1		498	1	1		498	1	1		498	1	1			498	1	0.9999837565941424		498	1	0.990863		498	1	0.9950799126354328		498	1	0.9977534324122098
499	1	1		499	1	0.9999999999127857		499	1	0.9999997543746045		499	1	0.9999999999036485			499	1	0.9988562873014195		499	1	0.919224		499	1	0.9472309660601943		499	1	0.9955130596716222
500	1	0.9999999972001486		500	1	0.9999515945273805		500	1	0.993444		500	1	0.42270375455043635			500	1	0.999845		500	1	0.442771		500	1	0.17690335928120712		500	1	0.635219
501	1	1		501	1	0.9999999250821996		501	1	0.9999997050111372		501	1	0.9999993774836252			501	1	0.999934		501	1	0.96114		501	1	0.9665866451977967		501	1	0.9877751393631544
502	1	1		502	1	1		502	1	0.9999999971409169		502	1	0.9999996707667618			502	1	0.996034		502	1	0.859029		502	1	0.9976369150232443		502	1	0.9505207861381679
503	1	1		503	1	0.9999999999999905		503	1	0.9999999991458517		503	1	0.9999993327555887			503	1	0.9973964712013498		503	1	0.601182		503	1	0.874127		503	1	0.9925973851296773
504	1	0.9999999998729436		504	1	0.9998185987471501		504	1	0.9998107041400104		504	1	0.9999650035256127			504	1	0.9921228204374556		504	1	0.329107		504	1	0.45829306898729777		504	1	0.2560543165088119
505	1	0.9999999999998411		505	1	0.9999890575204097		505	1	0.999995		505	1	0.9999771159654088			505	1	0.9999291053601924		505	1	0.512226		505	1	0.7177019886440661		505	1	0.9891570673334156
506	1	0.9999999999992426		506	1	0.9999998455180923		506	1	0.9999931513211611		506	1	0.9997887799330533			506	1	0.9999903802501388		506	1	0.739883		506	1	0.6397928826929571		506	1	0.6090031629007511
507	1	0.9999999999822464		507	1	0.9376934347687943		507	1	0.9968144645805799		507	1	0.9890296853063832			507	1	0.9999852197520387		507	1	0.949734		507	1	0.9824063441633591		507	1	0.9991882194411346
508	1	1		508	1	0.9999998878022043		508	1	0.9999999953852465		508	1	0.9999771332071093			508	1	0.9999866829843423		508	1	0.330772		508	1	0.33743014715972797		508	1	0.5083826897413081
509	1	1		509	1	0.9999999950447405		509	1	0.9999999997295318		509	1	0.9999983830226636			509	1	0.9999851799078927		509	1	0.854819		509	1	0.9988940311361759		509	1	0.9211423110392065
510	1	1		510	1	0.9999999999878219		510	1	0.9999999994497415		510	1	0.7710189711551685			510	1	0.9981857208591557		510	1	0.372734		510	1	0.769961		510	1	0.2922942649986343
511	1	1		511	1	0.9999981415114682		511	1	0.9999999688488069		511	1	0.9577849521998031			511	1	0.9999089672545372		511	1	0.61831		511	1	0.9621897256132749		511	1	0.7532697342277249
512	1	1		512	1	0.9999999999981256		512	1	0.9999999986834265		512	1	0.9999987724716695			512	1	0.9969958499907644		512	1	0.762691		512	1	0.9937182070155516		512	1	0.6228201634430632
513	1	1		513	1	0.9999999306856324		513	1	0.9999999451665753		513	1	0.9936395099395736			513	1	0.9799126172153726		513	1	0.177009		513	1	0.5069566809008113		513	1	0.6740897035366105
514	1	1		514	1	0.9999999991596621		514	1	0.9999999044552592		514	1	0.9932021761702775			514	1	0.9956965182506791		514	1	0.44384		514	1	0.7466033632742931		514	1	0.7500651956891418
515	1	1		515	1	1		515	1	0.9999995550172147		515	1	0.9901604501062508			515	1	0.9955476831463341		515	1	0.0900448		515	1	0.2965970297839503		515	1	0.22893492439180912
516	1	1		516	1	0.9999998624690768		516	1	0.9999203093551435		516	1	0.96444			516	1	0.9984405863712968		516	1	0.310075		516	1	0.2673614129995259		516	1	0.33767851102288116
517	1	1		517	1	0.9999998126973021		517	1	1		517	1	0.9856399425501892			517	1	0.9995873964974643		517	1	0.124878		517	1	0.5012026579778447		517	1	0.26070004273942315
518	1	1		518	1	0.9999993760309103		518	1	0.9999999983205762		518	1	0.9952505297206253			518	1	0.9038252930128703		518	1	0.0385072		518	1	0.36748296961062765		518	1	0.566383
519	1	1		519	1	0.9999982697315098		519	1	0.9999915288200498		519	1	0.8020778497377506			519	1	0.9998535133512287		519	1	0.0988579		519	1	0.2705842036172192		519	1	0.24130200889394574
520	1	1		520	1	0.9999982791807294		520	1	0.9999871476101618		520	1	0.8692312984566102			520	1	0.9948720215110798		520	1	0.152237		520	1	0.7679184429690029		520	1	0.38286648821025443
521	1	1		521	1	0.9999999259404003		521	1	0.9999974740586571		521	1	0.9987717132455635			521	1	0.9998799865425289		521	1	0.278947		521	1	0.9465964149125203		521	1	0.890996
522	1	1		522	1	0.9999999944705408		522	1	0.9999998036176964		522	1	0.9999997682205083			522	1	0.9997236382089869		522	1	0.975531		522	1	0.9907581152788594		522	1	0.977669
523	1	1		523	1	0.9999981187699081		523	1	0.9999986298069197		523	1	0.9939930498893836			523	1	0.9911087685517719		523	1	0.699716		523	1	0.5681528367541677		523	1	0.8189842785763569
524	1	1		524	1	0.9999999524600957		524	1	0.9999993267600895		524	1	0.9945583219028838			524	1	0.999607		524	1	0.102713		524	1	0.23509496591754564		524	1	0.6741976221801426
525	1	1		525	1	0.9999999775007787		525	1	0.9999962108971572		525	1	0.9666738779899542			525	1	0.9998827036433735		525	1	0.423011		525	1	0.8446165731469307		525	1	0.6890981398450919
526	1	1		526	1	0.9999999535952661		526	1	0.999999		526	1	0.9933028949403823			526	1	0.9978906278548797		526	1	0.651914		526	1	0.9472503389171006		526	1	0.6146466358220074
527	1	1		527	1	0.9999999971025059		527	1	0.9999999990509247		527	1	0.9999687634594335			527	1	0.9997974251899964		527	1	0.896151		527	1	0.9845471078312881		527	1	0.9171095712150275
528	1	1		528	1	1		528	1	0.9999999999988982		528	1	0.9999999988317858			528	1	0.9999579008006769		528	1	0.962954		528	1	0.9744774392204271		528	1	0.8624726076863263
529	1	1		529	1	0.9999999977990532		529	1	1		529	1	0.9999994788123064			529	1	0.9882480901381139		529	1	0.870091		529	1	0.9908004533622972		529	1	0.8422122350914164
530	1	1		530	1	0.9999999993057292		530	1	0.9999999993095295		530	1	0.9999909700354476			530	1	0.9897366098601464		530	1	0.884813		530	1	0.9930564682760935		530	1	0.9509492419524838
531	1	1		531	1	0.9999999992790561		531	1	0.9999999970541791		531	1	0.9999961636300361			531	1	0.9997711256369768		531	1	0.554641		531	1	0.91563		531	1	0.8831295652066602
532	1	1		532	1	1		532	1	0.9999999999996507		532	1	0.905579			532	1	0.9999903934614008		532	1	0.847831		532	1	0.9404784903094034		532	1	0.7211153269543132
533	1	1		533	1	0.9999999997338753		533	1	0.9999999998615504		533	1	0.9999990536968654			533	1	0.9777443488800487		533	1	0.903577		533	1	0.9934492077251191		533	1	0.9608960447307794
534	1	1		534	1	0.9999999999999063		534	1	1		534	1	0.9997145107467907			534	1	0.9997855883714378		534	1	0.803471		534	1	0.9972220663995998		534	1	0.46414681972775884
535	1	1		535	1	0.9999999999999861		535	1	0.9999999999979896		535	1	0.9999999070359352			535	1	0.9995547623893896		535	1	0.244646		535	1	0.843107		535	1	0.26632815906580026
536	1	1		536	1	0.9999999999999994		536	1	0.9999999999996383		536	1	0.9999969846919409			536	1	0.9999206652681503		536	1	0.98658		536	1	0.9983497957034987		536	1	0.6386563810589464
537	1	1		537	1	0.9999999999999998		537	1	0.9999999999988157		537	1	0.999994			537	1	0.9753070815021062		537	1	0.681373		537	1	0.9305627541609468		537	1	0.3004067884046172
538	1	1		538	1	1		538	1	0.9999999998264384		538	1	0.9999978025083871			538	1	0.999646		538	1	0.742743		538	1	0.9756061492075722		538	1	0.8735437861185429
539	1	1		539	1	0.9999999994808939		539	1	0.9999999996741623		539	1	0.9999990571053831			539	1	0.9998968643886154		539	1	0.578177		539	1	0.9488551692253321		539	1	0.6508847074924277
540	1	1		540	1	0.9999999999977222		540	1	0.9999999996701676		540	1	0.9999996527071616			540	1	0.9999002340747258		540	1	0.733068		540	1	0.9817268781965379		540	1	0.8800074544472465
541	1	1		541	1	1		541	1	1		541	1	0.9999997887185965			541	1	0.9999973992993952		541	1	0.97002		541	1	0.9928626182544985		541	1	0.9135315005666346
542	1	1		542	1	0.9999999999999319		542	1	0.9999999999626082		542	1	0.9999879203703402			542	1	0.9993505818730914		542	1	0.843721		542	1	0.9788968674642428		542	1	0.8938172504857342
543	1	1		543	1	0.9999999999999998		543	1	0.9999999999996525		543	1	0.9999939006624471			543	1	0.970747		543	1	0.61807		543	1	0.9206448209254808		543	1	0.8595267062951569
544	1	1		544	1	1		544	1	1		544	1	0.9999911280370152			544	1	0.9999511273321692		544	1	0.962683		544	1	0.9597557868284364		544	1	0.8419139761612409
545	1	1		545	1	0.9999999999994377		545	1	0.9999999999855447		545	1	0.9999987324873717			545	1	0.999995		545	1	0.657866		545	1	0.932734		545	1	0.38176398008880286
546	1	1		546	1	0.9999999999999934		546	1	1		546	1	0.9999993907656824			546	1	0.9994377272479081		546	1	0.416434		546	1	0.935837		546	1	0.8144660124888827
547	1	1		547	1	0.9999999999999964		547	1	0.9999999999989695		547	1	0.9999992366850021			547	1	0.999804		547	1	0.317893		547	1	0.8445806370137093		547	1	0.6895461798142433
548	1	0.9999999999999961		548	1	0.9999999999977096		548	1	0.9999998404239606		548	1	0.9999923004233242			548	1	0.9996226614546073		548	1	0.881687		548	1	0.9491162430023662		548	1	0.9073087349676108
549	1	1		549	1	0.9999999999999815		549	1	0.9999999977043409		549	1	0.9999999991868116			549	1	0.9999887920858151		549	1	0.724196		549	1	0.9634780839076079		549	1	0.9939080917364191
550	1	1		550	1	0.9999999999992865		550	1	1		550	1	0.9999995723806231			550	1	0.9827729010815882		550	1	0.625675		550	1	0.9778057250413352		550	1	0.9287421954231346
551	1	1		551	1	1		551	1	1		551	1	0.9999906438578645			551	1	0.9995652892851159		551	1	0.703949		551	1	0.9525459448988914		551	1	0.9976460651978459
552	1	1		552	1	1		552	1	0.9999999999487422		552	1	0.9999999820745079			552	1	0.9999591873726894		552	1	0.925053		552	1	0.9979002625800618		552	1	0.9998191666889196
553	1	1		553	1	0.9999999999999953		553	1	0.9999999998098692		553	1	0.9999993958437293			553	1	0.999874		553	1	0.991854		553	1	0.9997850527533414		553	1	0.9984576528553147
554	1	1		554	1	1		554	1	0.9999999990944172		554	1	0.9999999993786816			554	1	0.9998958721880916		554	1	0.939377		554	1	0.9982865320707915		554	1	0.9995146564279968
555	1	1		555	1	1		555	1	0.9999998659656328		555	1	0.9999998693163463			555	1	0.9915465740281051		555	1	0.771397		555	1	0.9930792983915628		555	1	0.9863069177626216
556	1	1		556	1	0.9999999999964373		556	1	0.9999999939258689		556	1	0.9999994181815471			556	1	0.9888985395884398		556	1	0.907686		556	1	0.9983679563834803		556	1	0.9970822341877604
557	1	1		557	1	0.9999999999999502		557	1	0.9999999998775098		557	1	0.9999998910122513			557	1	0.9964062897499175		557	1	0.87277		557	1	0.9969378948401584		557	1	0.9984488440556138
558	1	1		558	1	0.9999999999997145		558	1	0.9999999998017334		558	1	0.9999999551604761			558	1	0.9996659413972444		558	1	0.955149		558	1	0.9992390449168378		558	1	0.9993527161184426
559	1	1		559	1	0.9999999999779321		559	1	1		559	1	0.9999999356475333			559	1	0.9996862692030347		559	1	0.982302		559	1	0.9989933210146947		559	1	0.9994425408432752
560	1	1		560	1	1		560	1	0.9999999961983249		560	1	0.9999999983120178			560	1	0.9999991835153921		560	1	0.989961		560	1	0.9997894207065163		560	1	0.9914332810019734
561	1	1		561	1	0.9999999999999333		561	1	0.9999999947595122		561	1	0.9999998905893143			561	1	0.9999996490158921		561	1	0.999024		561	1	0.9860567135900077		561	1	0.9958933904663965
562	1	1		562	1	0.9999999999999972		562	1	0.9999999998531627		562	1	0.9999731418668469			562	1	0.9951709393113735		562	1	0.560592		562	1	0.9375179233786606		562	1	0.9967240130758248
563	1	1		563	1	0.9999999999999951		563	1	0.9999999885879507		563	1	0.9999999387904389			563	1	0.9992376027897174		563	1	0.947936		563	1	0.9994545779305154		563	1	0.9895668828282391
564	1	0.9999999999998201		564	1	0.8192459770008126		564	1	0.7561075958209713		564	1	0.802023			564	1	0.99934		564	1	0.228782		564	1	0.3581454586047252		564	1	0.4592638776238785
565	1	1		565	1	0.9999999999999022		565	1	1		565	1	0.9999999922421099			565	1	0.9564655927906321		565	1	0.624835		565	1	0.9342007084996466		565	1	0.9843442441503605
566	1	1		566	1	0.9999999999813689		566	1	1		566	1	0.9999950979804771			566	1	0.9852686613621575		566	1	0.775749		566	1	0.9780399331186902		566	1	0.970194
567	1	1		567	1	0.9999999998361075		567	1	0.9999999509107013		567	1	0.999989			567	1	0.9962973253414544		567	1	0.655453		567	1	0.9926070578290986		567	1	0.9988936520732924
568	1	1		568	1	1		568	1	0.9999999968312311		568	1	0.9999999675100524			568	1	0.9991196294156591		568	1	0.971123		568	1	0.9937808279572454		568	1	0.9993558353412152
569	1	1		569	1	1		569	1	0.9999999996178669		569	1	0.9999999871482995			569	1	0.9999993525760488		569	1	0.995309		569	1	0.998559		569	1	0.9722569203633056
570	1	1		570	1	0.9999999999878798		570	1	1		570	1	0.9999998988643032			570	1	0.9990552774892983		570	1	0.905853		570	1	0.9995378352417725		570	1	0.9842470518609069
571	1	1		571	1	0.9999999999997289		571	1	0.9999999994331759		571	1	0.9999997539044652			571	1	0.9978909286687432		571	1	0.751147		571	1	0.9799221577063137		571	1	0.9833160689492482
572	1	1		572	1	0.9999999999997489		572	1	1		572	1	0.9999998950526159			572	1	0.9614574997445093		572	1	0.95088		572	1	0.9897495329614139		572	1	0.9963884935676203
573	1	1		573	1	0.9999999999999998		573	1	0.9999999997300629		573	1	0.9999997661013675			573	1	0.9998646558424641		573	1	0.91541		573	1	0.9983595282749538		573	1	0.8217566622402398
574	1	1		574	1	1		574	1	0.9999999999597574		574	1	0.9999999963762823			574	1	0.9999997107978431		574	1	0.986348		574	1	0.9977249534519167		574	1	0.9884818150318626
575	1	1		575	1	0.9999999999999921		575	1	0.9999999997954113		575	1	0.9999999960535702			575	1	0.9944626247365393		575	1	0.968138		575	1	0.9998069762439872		575	1	0.9919466872044942
576	1	0.9999999999999997		576	1	0.9999999998798377		576	1	0.9999995935781022		576	1	0.9999861768367392			576	1	0.9639463052833035		576	1	0.931389		576	1	0.9929883703008328		576	1	0.9991597365217595
577	1	1		577	1	0.9999999999920163		577	1	0.9999999938737781		577	1	0.9999999308956454			577	1	0.999971		577	1	0.453266		577	1	0.3356491484141281		577	1	0.2881294332590993
578	1	1		578	1	0.9999999999997913		578	1	0.9999999757287859		578	1	0.999995			578	1	0.9999844359795306		578	1	0.888094		578	1	0.9942918796109798		578	1	0.9980444271910789
579	1	1		579	1	0.9999999999999959		579	1	0.9999999926454786		579	1	0.9999983107972166			579	1	0.9972926347686188		579	1	0.878966		579	1	0.9997449452784399		579	1	0.8682928763787724
580	1	1		580	1	0.9999999999999987		580	1	0.9999999999991735		580	1	0.9999999254954383			580	1	0.9999375052734449		580	1	0.560074		580	1	0.9352188035028762		580	1	0.9861210229373261
581	1	1		581	1	0.9999999999667061		581	1	0.9999994892907792		581	1	0.999995			581	1	0.9993515570496723		581	1	0.898472		581	1	0.9955677235561824		581	1	0.9945381544630186
582	1	1		582	1	0.9999999993631072		582	1	0.9999998237616277		582	1	0.9999949595254439			582	1	0.9999308436987779		582	1	0.972427		582	1	0.9964085508552677		582	1	0.47640704095720315
583	1	1		583	1	0.9999999999479161		583	1	0.9999999627010766		583	1	0.8360310051476284			583	1	0.9998125397594435		583	1	0.680413		583	1	0.9822237568807851		583	1	0.8836146604455899
584	1	1		584	1	0.9999999999999695		584	1	0.9999999998761456		584	1	0.9999999033157271			584	1	0.9976796972963382		584	1	0.989042		584	1	0.9967033254203114		584	1	0.9991007346025234
585	1	1		585	1	0.9999999999999959		585	1	0.9999998720877408		585	1	0.9999594206092445			585	1	0.9993241252036336		585	1	0.33841		585	1	0.7913832230220077		585	1	0.5549874135612759
586	1	1		586	1	0.9999999999999994		586	1	0.9999999995499944		586	1	1			586	1	0.9999763097376483		586	1	0.890959		586	1	0.991983		586	1	0.9928579312691186
587	1	1		587	1	0.9999999999998711		587	1	1		587	1	0.9999999985264446			587	1	0.9997587580446375		587	1	0.983576		587	1	0.9989606192567021		587	1	0.999514
588	1	1		588	1	0.9999999999999942		588	1	0.9999999997037977		588	1	0.9999914707046912			588	1	0.8083353285119652		588	1	0.0887367		588	1	0.4016980035619777		588	1	0.5438734008650552
589	1	1		589	1	0.9999999999999998		589	1	0.9999999997359308		589	1	0.9999998964905724			589	1	0.9866276626888153		589	1	0.345032		589	1	0.820347		589	1	0.8827761247246944
590	1	1		590	1	0.9999999999998638		590	1	0.9999999629969464		590	1	0.9999996867793979			590	1	0.9967590279273563		590	1	0.400865		590	1	0.5698285201886801		590	1	0.769567
591	1	0.9999999991930693		591	1	0.9999768349837012		591	1	0.9999211321413864		591	1	0.9991066260756991			591	1	0.9867073607844693		591	1	0.341674		591	1	0.2526782441583885		591	1	0.29448006917282815
592	1	1		592	1	0.9999999999999962		592	1	0.9999999997969592		592	1	0.999998			592	1	0.9993293016786579		592	1	0.901397		592	1	0.998319		592	1	0.9497495411127318
593	1	1		593	1	0.9999999999991167		593	1	0.9999999906510023		593	1	0.9999883736494181			593	1	0.9999982538750313		593	1	0.713463		593	1	0.9923318858585676		593	1	0.9503156604898042
594	1	1		594	1	0.9999999999994061		594	1	1		594	1	0.9999731837526508			594	1	0.9999549651621343		594	1	0.998224		594	1	0.9992220987989975		594	1	0.9962543798795152
595	1	1		595	1	1		595	1	1		595	1	0.9999999617212377			595	1	0.9999967396273655		595	1	0.999278		595	1	0.9996585895348469		595	1	0.9579329623025621
596	1	0.9999999999589373		596	1	0.9999999975737928		596	1	0.9982442498909254		596	1	0.9999843042865255			596	1	0.9995415548253618		596	1	0.152028		596	1	0.3846516448705327		596	1	0.7287312431106111
597	1	1		597	1	1		597	1	0.9999999998550395		597	1	0.9999999613837028			597	1	0.9999729218713109		597	1	0.842131		597	1	0.9849783114613272		597	1	0.9956796151086186
598	1	1		598	1	0.9999999999999998		598	1	0.9999999997562938		598	1	0.9999985004578387			598	1	0.9997259886142593		598	1	0.810697		598	1	0.9905098070585614		598	1	0.8397377867901571
599	1	1		599	1	0.9999999999999878		599	1	1		599	1	0.9999879994612395			599	1	0.9997707922804179		599	1	0.964121		599	1	0.9966299824948579		599	1	0.9959937530130175
600	1	1		600	1	0.9999999998601201		600	1	0.9999999961048369		600	1	1			600	1	0.9999898915940083		600	1	0.76011		600	1	0.9872473213361042		600	1	0.9987796692888423
601	1	1		601	1	0.9999999841758462		601	1	0.9999999305531604		601	1	0.9999995067538926			601	1	0.9361782391163118		601	1	0.202843		601	1	0.6141371793711292		601	1	0.9142524969139353
602	1	1		602	1	0.9999999997763106		602	1	0.9999975933435956		602	1	0.9999451519993351			602	1	0.9999349132139188		602	1	0.978231		602	1	0.9998240510514231		602	1	0.9995257999843482
603	1	1		603	1	0.9999999995355823		603	1	0.999999		603	1	0.9999931853687203			603	1	0.9989456519400974		603	1	0.901748		603	1	0.9940971772506214		603	1	0.9978507344765659
604	1	1		604	1	0.9999999796022777		604	1	0.9999994051223712		604	1	0.9999932709383812			604	1	0.9999607020869141		604	1	0.864132		604	1	0.9940305549672658		604	1	0.9975333780583687
605	1	1		605	1	0.9999998039927687		605	1	0.9999993639253246		605	1	0.9998039113089907			605	1	0.9998912929908492		605	1	0.950823		605	1	0.9999213676235086		605	1	0.9996050597719479
606	1	0.9999999998361534		606	1	0.9989290209127928		606	1	0.9996382297817653		606	1	0.9576541778061548			606	1	0.9999999551224117		606	1	0.557704		606	1	0.7885961569943283		606	1	0.9750496305457648
607	1	0.9999999281004075		607	1	0.9977315038941967		607	1	0.9854932080447624		607	1	0.9885057022151967			607	1	0.9999999998697751		607	1	0.559311		607	1	0.7566905552902997		607	1	0.7762851467018227
608	1	0.9999999398523292		608	1	0.9996207472474967		608	1	0.9999932860690789		608	1	0.9961056294445181			608	1	0.9999985076507032		608	1	0.48006		608	1	0.4055678586131648		608	1	0.563251
609	1	0.9999999999955931		609	1	0.9842438692333775		609	1	0.9108590471623421		609	1	0.8445421157343506			609	1	0.9999677636403205		609	1	0.340736		609	1	0.36667919532407867		609	1	0.4181689057105216
610	1	0.9999999386655708		610	1	0.9979240038327907		610	1	0.9856561317764895		610	1	0.9902149986707584			610	1	0.9999999991405056		610	1	0.380975		610	1	0.19946741316400377		610	1	0.2511465611664296
611	1	0.9999999926838508		611	1	0.9983550549257085		611	1	0.9991760468985915		611	1	0.9822371683021481			611	1	1		611	1	0.494124		611	1	0.37091379095630067		611	1	0.35106648397922424
612	1	1		612	1	0.9882040369235322		612	1	0.9975845310993164		612	1	0.9917920344803348			612	1	1		612	1	0.18688		612	1	0.7417788626299298		612	1	0.45414031540995603
613	1	1		613	1	0.9999511807237315		613	1	0.9999683026924289		613	1	0.9968977811676006			613	1	0.9783475545792317		613	1	0.232697		613	1	0.4135373001038929		613	1	0.5867503671957885
614	1	1		614	1	1		614	1	0.999979		614	1	0.9999571404913681			614	1	0.9968237974822504		614	1	0.655773		614	1	0.7251524410058179		614	1	0.9464748950413141
615	1	1		615	1	0.9999406420462894		615	1	0.9999753009003183		615	1	0.9811131423766015			615	1	0.9981215255527938		615	1	0.210567		615	1	0.30860893510042575		615	1	0.4235030238943359
616	1	1		616	1	0.9999999299152997		616	1	0.9999999690325455		616	1	0.9999959653096946			616	1	0.9759981343320346		616	1	0.551485		616	1	0.9523264130847638		616	1	0.9994711813356678
617	1	1		617	1	0.9999998611627443		617	1	0.9999999760329066		617	1	0.9999937744089178			617	1	0.9996734093956233		617	1	0.679926		617	1	0.9935186180953773		617	1	0.9989974662787996
618	1	1		618	1	0.9995515023168193		618	1	0.9997511837106708		618	1	0.9982844913439358			618	1	0.9999264209374872		618	1	0.108835		618	1	0.0893151		618	1	0.0729222
619	1	1		619	1	0.9999998069141679		619	1	0.9999948026677222		619	1	0.9986768319127795			619	1	0.9133961866089891		619	1	0.094402		619	1	0.0930891		619	1	0.2807334702058705
620	1	1		620	1	0.9999954735289004		620	1	0.9999986616367834		620	1	0.9999664727957979			620	1	0.91335		620	1	0.267287		620	1	0.28348673421320963		620	1	0.38833135344009356
621	1	1		621	1	0.999999		621	1	0.9999995215434935		621	1	0.9999917542404476			621	1	0.9962643793922957		621	1	0.751671		621	1	0.9817145545054539		621	1	0.9990501405068924
622	1	1		622	1	0.9999996050093531		622	1	0.9999980449685627		622	1	0.9999996362690959			622	1	0.9999983908214948		622	1	0.613245		622	1	0.9991464200886101		622	1	0.9287145315585491
623	1	1		623	1	0.9999999999420132		623	1	0.9999999890126577		623	1	0.9999997236406852			623	1	0.9999997888263404		623	1	0.990369		623	1	0.9998490988756467		623	1	0.9998300896533827
624	1	1		624	1	0.9999999999985444		624	1	0.9999999465656285		624	1	0.9999993161847216			624	1	0.9999979653621095		624	1	0.988985		624	1	0.9998657558020396		624	1	0.9998215355167747
625	1	1		625	1	0.9999999543995916		625	1	0.9999999999815807		625	1	0.9999999656056829			625	1	0.999447		625	1	0.818172		625	1	0.9981291014190499		625	1	0.9987815873446224
626	1	1		626	1	0.9999993884065468		626	1	0.9999995441831241		626	1	0.9998533224852094			626	1	0.9999945255002071		626	1	0.886297		626	1	0.9817041303938855		626	1	0.9950910267335448
627	1	1		627	1	0.9999999998582307		627	1	0.9999999999503942		627	1	0.9999999900361082			627	1	0.9999977304555887		627	1	0.763924		627	1	0.9955073142567319		627	1	0.9989870553687972
628	1	1		628	1	0.9999999994082195		628	1	1		628	1	1			628	1	0.9903975212646547		628	1	0.626743		628	1	0.7815523805436613		628	1	0.9717507595052368
629	1	1		629	1	0.9999999991401076		629	1	1		629	1	0.9999999969311002			629	1	0.999991		629	1	0.724416		629	1	0.8988939596777162		629	1	0.9790486216924015
630	1	1		630	1	0.9999999979473861		630	1	0.9999999942217981		630	1	0.9999993716182429			630	1	0.9865208213832813		630	1	0.934743		630	1	0.956352		630	1	0.9955504741639221
631	1	1		631	1	0.9999998341895227		631	1	0.9999999998576828		631	1	0.9999998927293652			631	1	0.9999160719094395		631	1	0.421781		631	1	0.9635878182559917		631	1	0.9959716581207821
632	1	1		632	1	0.9999999975523003		632	1	0.9999999947019719		632	1	0.999998			632	1	0.9980173952943568		632	1	0.778616		632	1	0.9686340679390004		632	1	0.9971282590730995
633	1	1		633	1	0.9999999989952986		633	1	0.9999999970886956		633	1	0.9999999042723516			633	1	0.9987210863747878		633	1	0.726454		633	1	0.9556180582444996		633	1	0.9940495252138227
634	1	1		634	1	0.9999999999851424		634	1	0.9999999996617055		634	1	1			634	1	1		634	1	0.967515		634	1	0.9983243905701429		634	1	0.9993328138748582
635	1	0.9999999999983942		635	1	0.9999990472211241		635	1	0.999996		635	1	0.9994271366825447			635	1	0.9957669897577002		635	1	0.565354		635	1	0.9107333240388757		635	1	0.997034
636	1	1		636	1	0.9999961033353973		636	1	0.9999923587791034		636	1	0.9997871244515047			636	1	0.9996157500077623		636	1	0.491748		636	1	0.8989608597581861		636	1	0.9872306876418744
637	1	0.9999999999999933		637	1	0.9999861126407819		637	1	0.9999838069006401		637	1	0.9994006301335009			637	1	0.998521		637	1	0.866138		637	1	0.973439		637	1	0.9879890783821657
638	1	0.9999999999999165		638	1	0.9998976118281949		638	1	0.99999		638	1	0.9994849517458446			638	1	0.9999246424919793		638	1	0.752977		638	1	0.6356238053760037		638	1	0.9242501051943703
639	1	0.9999999999999972		639	1	0.9973579400677627		639	1	0.999753		639	1	0.9996182716321994			639	1	0.9998006312189847		639	1	0.696139		639	1	0.7957600823668173		639	1	0.9930952830152654
640	1	0.9999999999999954		640	1	0.9997693585015534		640	1	0.9999909961048866		640	1	0.999919			640	1	0.9994628659843869		640	1	0.672375		640	1	0.9365337926554259		640	1	0.9974303465793695
641	1	1		641	1	0.9999990406472233		641	1	0.9999975759769679		641	1	0.9999154559663443			641	1	0.999381		641	1	0.187594		641	1	0.3719931914686154		641	1	0.28214644589735255
642	1	0.9999999999999993		642	1	0.999997		642	1	0.999995		642	1	0.9990782527156423			642	1	0.9909895079789762		642	1	0.358715		642	1	0.8960798531883335		642	1	0.9928043256312659
643	1	0.9999999999999993		643	1	0.9999977718761541		643	1	0.9994620998410757		643	1	0.9975687384985679			643	1	0.9988483290266008		643	1	0.244372		643	1	0.16220176222767824		643	1	0.10744351336923316
644	1	0.6111017199896647		644	1	0.9981594222851484		644	1	0.9945258986259902		644	1	0.9933476195440467			644	1	0.777689		644	1	0.224455		644	1	0.18669614375153748		644	1	0.2875799442761026
645	1	0.9999999999941707		645	1	0.9999994676165341		645	1	0.9966410088875193		645	1	0.9975150910428243			645	1	0.9978324590849318		645	1	0.294174		645	1	0.14692461164013054		645	1	0.4824437765279478
646	1	1		646	1	0.9999905812766668		646	1	0.9994512227357824		646	1	0.999787			646	1	0.9934530315297259		646	1	0.116898		646	1	0.0809232		646	1	0.180881
647	1	0.9999999999999235		647	1	0.9999999913202109		647	1	0.9999667750045468		647	1	0.9995840685567459			647	1	0.9968713797484652		647	1	0.560663		647	1	0.8316169295977414		647	1	0.9961156489845034
648	1	0.9999999999703482		648	1	0.45493183635661477		648	1	0.1258971681025558		648	1	0.1988626222850103			648	1	0.40653646541565513		648	1	0.249517		648	1	0.3593702084543794		648	1	0.9358921981114712
649	1	1		649	1	0.9999955512961975		649	1	0.9999992743399397		649	1	0.9999964146018635			649	1	0.99999		649	1	0.734601		649	1	0.9084034776007615		649	1	0.9990814146894793
650	1	1		650	1	0.9999453138287172		650	1	0.9999999997047267		650	1	0.9999997557553221			650	1	0.9986950828230122		650	1	0.618834		650	1	0.9044005289644922		650	1	0.9985656692935936
651	1	1		651	1	0.9999956420119264		651	1	0.9999999998198965		651	1	0.9999998098726038			651	1	0.995575		651	1	0.530718		651	1	0.7121793080699437		651	1	0.9954244043955905
652	1	0.9999999999696048		652	1	0.9999999799141756		652	1	0.9999999955723461		652	1	0.9999928790732607			652	1	0.9369657563176939		652	1	0.510523		652	1	0.9939741346298849		652	1	0.9989185442991977
653	1	1		653	1	0.9999619608971363		653	1	0.9999999995885195		653	1	0.9999997294311623			653	1	0.9986033345265836		653	1	0.647162		653	1	0.9050077492342472		653	1	0.9988920792637747
654	1	1		654	1	0.9999652679559901		654	1	0.9999999988302685		654	1	0.9999997258921242			654	1	0.997878		654	1	0.593563		654	1	0.8058882617489924		654	1	0.9962278590976087
655	1	0.9999999999996232		655	1	0.9999979426380369		655	1	0.999988		655	1	0.9999958841525749			655	1	0.8302683356357691		655	1	0.254116		655	1	0.38699779840598647		655	1	0.598269
656	1	1		656	1	0.9999994235270024		656	1	0.9999999992783684		656	1	0.9999979195666047			656	1	0.9994868925416954		656	1	0.410214		656	1	0.8829233353024893		656	1	0.9950473172944273
657	1	1		657	1	0.9999999845361822		657	1	0.9999999995764022		657	1	0.9999998935762809			657	1	0.9788793507940019		657	1	0.287851		657	1	0.7284917225355795		657	1	0.9557613959175955
658	1	1		658	1	0.9999999014022434		658	1	0.9999999994428194		658	1	0.9999999733887172			658	1	0.9997710545254567		658	1	0.710077		658	1	0.986716		658	1	0.998569
659	1	1		659	1	0.9999998756950611		659	1	1		659	1	0.9999870547196548			659	1	0.9863047397371107		659	1	0.684124		659	1	0.9858400107032887		659	1	0.9983767604534569
660	1	0.9999999999132386		660	1	0.9225622861311628		660	1	0.7532998698388754		660	1	0.9915678174079067			660	1	0.9236950880328086		660	1	0.239187		660	1	0.23090526236682163		660	1	0.3948457485209232
661	1	0.9999999999999997		661	1	0.9999959726678825		661	1	0.9999876704626841		661	1	0.9999430022463387			661	1	0.6614749965609096		661	1	0.446521		661	1	0.6274462997271281		661	1	0.9621769898376415
662	1	0.9999999999978373		662	1	0.9999999660536071		662	1	0.9999999986525437		662	1	0.9999949955813876			662	1	0.9496466849400147		662	1	0.283864		662	1	0.8396195108232014		662	1	0.995269
663	1	1		663	1	0.9999987698740608		663	1	0.9999999844346084		663	1	0.9999969084297031			663	1	0.8989678748858821		663	1	0.185935		663	1	0.8956307487156103		663	1	0.9988892869074533
664	1	1		664	1	0.9999999320436535		664	1	0.9999999999108877		664	1	0.9999707565844899			664	1	0.9905785591503609		664	1	0.679093		664	1	0.9789776979546024		664	1	0.9988456427325723
665	1	1		665	1	0.9999727920678206		665	1	0.9999999995502892		665	1	0.9999997457052894			665	1	0.9984972654897741		665	1	0.624382		665	1	0.903995		665	1	0.9989339842036219
666	1	1		666	1	0.9999998518525784		666	1	0.9999999999759511		666	1	0.9999997796697297			666	1	0.9999133486837263		666	1	0.873696		666	1	0.985302		666	1	0.998307
667	1	1		667	1	0.9999986956129202		667	1	1		667	1	0.9999994815476493			667	1	0.9989496886350434		667	1	0.59593		667	1	0.910482		667	1	0.9909770726995855
668	1	1		668	1	1		668	1	0.9999999290587067		668	1	0.9999948001268768			668	1	0.9997782405652806		668	1	0.323041		668	1	0.9009164861314697		668	1	0.9983328505110466
669	1	1		669	1	0.9999999997490866		669	1	0.9999996840108127		669	1	0.9999713247946838			669	1	0.9997182445199734		669	1	0.932827		669	1	0.9964513995875789		669	1	0.9990931069000287
670	1	1		670	1	0.9999999990276577		670	1	0.9988913979598107		670	1	0.9991123980393407			670	1	0.9999897823038678		670	1	0.769992		670	1	0.9759004605748949		670	1	0.9987833054664523
671	1	1		671	1	0.9999999999564488		671	1	0.9999998901157118		671	1	0.999902			671	1	0.9999674231528499		671	1	0.656882		671	1	0.9983609305880418		671	1	0.9980490255902253
672	1	1		672	1	0.9999998935419627		672	1	0.9999999993225448		672	1	0.9999998824245333			672	1	0.9989843023074835		672	1	0.925136		672	1	0.9941582402930095		672	1	0.9981487565423035
673	1	1		673	1	0.9999999915676584		673	1	0.9999993514103656		673	1	0.9999575079829511			673	1	0.999996		673	1	0.659268		673	1	0.9614637376427343		673	1	0.9933204977076028
674	1	1		674	1	0.9999998564760676		674	1	0.9999863826053821		674	1	0.999999			674	1	0.9999990787068344		674	1	0.27537		674	1	0.3432113127278452		674	1	0.2798146661441266
675	1	1		675	1	0.9999999994082557		675	1	1		675	1	0.9999934421050108			675	1	0.9999186582480891		675	1	0.680938		675	1	0.9563671627738535		675	1	0.9888560949749698
676	1	0.9999999999999986		676	1	1		676	1	0.9999994494106271		676	1	0.9999271980727473			676	1	0.9999641151687786		676	1	0.691719		676	1	0.9762965356081243		676	1	0.9979003632933909
677	1	1		677	1	0.9999999999787532		677	1	0.9999981084484396		677	1	0.9999125620489698			677	1	0.9999258938861686		677	1	0.911221		677	1	0.986856		677	1	0.9985663487940402
678	1	1		678	1	0.9999999968672771		678	1	1		678	1	0.9999966380695339			678	1	0.9999958406440987		678	1	0.964492		678	1	0.9986687159468021		678	1	0.9980784978949976
679	1	0.9999999999999665		679	1	0.9999976512501634		679	1	0.9999491415171298		679	1	0.9998827298788667			679	1	0.9999951621038524		679	1	0.150148		679	1	0.5035815014956282		679	1	0.8271852898862455
680	1	1		680	1	0.9999999998901099		680	1	0.9999997808977948		680	1	0.9998987340178751			680	1	0.9998197077442488		680	1	0.710966		680	1	0.9885145664624722		680	1	0.9966756371106581
681	1	1		681	1	1		681	1	0.9999744668942294		681	1	0.9998821087813139			681	1	0.9995834848167819		681	1	0.768371		681	1	0.964327		681	1	0.9920751262808861
682	1	1		682	1	0.9999999681050287		682	1	1		682	1	0.9998089137061965			682	1	0.9998838943117999		682	1	0.945887		682	1	0.9975845698420583		682	1	0.9979852876736032
683	1	1		683	1	0.9999976528927393		683	1	0.9999625321958844		683	1	0.9993379734869874			683	1	0.9726517134436365		683	1	0.489482		683	1	0.9961650437265389		683	1	0.9929581126980164
684	1	0.9999999997584582		684	1	0.9968913377604781		684	1	0.9992191027124756		684	1	0.9998347895592379			684	1	0.9999804778647383		684	1	0.418294		684	1	0.5049613862700054		684	1	0.6896231890756178
685	1	1		685	1	0.9999999977512276		685	1	0.9999996435394108		685	1	0.9999916406939975			685	1	0.9995339255504225		685	1	0.481342		685	1	0.9145982164341939		685	1	0.990211
686	1	1		686	1	0.9999999990116123		686	1	0.9999999545539867		686	1	0.9999949290759268			686	1	0.9998953614204735		686	1	0.804502		686	1	0.9846443025116548		686	1	0.9986833353825006
687	1	1		687	1	0.9999999987958721		687	1	0.9999999868320263		687	1	0.999996			687	1	0.9999826063251585		687	1	0.959532		687	1	0.9983006100151041		687	1	0.9987210586403465
688	1	1		688	1	0.9999999996721426		688	1	0.9999999577504104		688	1	0.9999987300919028			688	1	0.9919773964818343		688	1	0.936822		688	1	0.9970165974914911		688	1	0.9976500929046588
689	1	0.9999999999999972		689	1	0.9999999997536371		689	1	0.9999998682435061		689	1	0.999843			689	1	0.9999926520861062		689	1	0.216561		689	1	0.9780994169336061		689	1	0.9963111878594646
690	1	1		690	1	0.9999994302402873		690	1	0.9999939487004985		690	1	0.9999790478028563			690	1	0.998945		690	1	0.610421		690	1	0.9431010162429652		690	1	0.94411
691	1	0.9999999999999574		691	1	0.9999922967459255		691	1	0.9999243604419124		691	1	0.9992795653457439			691	1	0.999494		691	1	0.761593		691	1	0.9846507958662064		691	1	0.9986329603290877
692	1	1		692	1	0.9999999995793024		692	1	1		692	1	0.9999976294434716			692	1	0.9998952926524932		692	1	0.532502		692	1	0.636944		692	1	0.8314975838103009
693	1	1		693	1	1		693	1	0.9999643469470264		693	1	0.9999855981166134			693	1	0.9999872108018787		693	1	0.828106		693	1	0.4594315369918385		693	1	0.7649547738426651
694	1	1		694	1	0.9999999913108009		694	1	0.9999996247321232		694	1	0.9999792007645387			694	1	0.9999972264149198		694	1	0.779658		694	1	0.9999417591300562		694	1	0.9996267126153535
695	1	1		695	1	0.9999647494450169		695	1	0.9999615511859101		695	1	0.999998			695	1	0.9999956773498898		695	1	0.854129		695	1	0.9042429961980472		695	1	0.9962627701409816
696	1	1		696	1	0.9999999093012985		696	1	0.999999		696	1	0.9999990970050744			696	1	0.9999883147544936		696	1	0.929214		696	1	0.9969048603853904		696	1	0.9988814258534684
697	1	1		697	1	0.9999999919037453		697	1	0.9999999958630579		697	1	0.9999958552760607			697	1	0.9999540701988004		697	1	0.984557		697	1	0.9620110405090995		697	1	0.9897579434750347
698	1	1		698	1	0.9999999983483928		698	1	0.9999999598337506		698	1	0.9999985784229279			698	1	0.9995622624678565		698	1	0.961918		698	1	0.9997074909130234		698	1	0.9995373983722808
699	1	1		699	1	0.9999999999531968		699	1	0.9999997588856173		699	1	0.9999215279327646			699	1	0.9998714095989957		699	1	0.595075		699	1	0.9207805048332237		699	1	0.9937727678274269
700	1	0.9999999999999752		700	1	0.9999999716246746		700	1	1		700	1	0.9999999746527442			700	1	0.9915827333628866		700	1	0.706143		700	1	0.9943826962788231		700	1	0.9994208150929573
701	1	1		701	1	0.9999999998820246		701	1	0.9999999999985303		701	1	0.9999999995040081			701	1	0.9726475433028778		701	1	0.836469		701	1	0.9848394783127041		701	1	0.9996813394142394
702	1	1		702	1	0.9999999999282762		702	1	0.9999999999005204		702	1	1			702	1	0.9529787744105068		702	1	0.321683		702	1	0.9039782137294968		702	1	0.9982699758210004
703	1	1		703	1	0.9999992980112116		703	1	0.9999998196087536		703	1	0.9999883273117651			703	1	0.9995959433871995		703	1	0.873677		703	1	0.9977286843793848		703	1	0.9986664896659632
704	1	1		704	1	0.9999999793831701		704	1	0.9999998251653569		704	1	0.999998			704	1	0.9995374463552813		704	1	0.534616		704	1	0.6660561070730295		704	1	0.835653
705	1	1		705	1	0.9999999999941431		705	1	0.9999999999981434		705	1	0.9999998156436533			705	1	0.9569731022689512		705	1	0.862187		705	1	0.9728304886957768		705	1	0.9976611281724012
706	1	1		706	1	0.9999999786341761		706	1	0.9999999999688233		706	1	0.9999999998797828			706	1	0.9964556109411808		706	1	0.588877		706	1	0.979678		706	1	0.992487
707	1	0.9999999999999735		707	1	1		707	1	0.9999992172559321		707	1	0.9999988333319505			707	1	0.9131844988459293		707	1	0.366096		707	1	0.5453219169798007		707	1	0.3584675349561661
708	1	0.9999999359860593		708	1	0.9999958579985682		708	1	0.9999996993964747		708	1	0.9996935038782432			708	1	0.9575664007171104		708	1	0.259795		708	1	0.7404202638247508		708	1	0.9425258968565746
709	1	0.9999999988596581		709	1	0.9999880896784358		709	1	0.9999999812419228		709	1	0.999997			709	1	0.973169		709	1	0.691912		709	1	0.6771062167866269		709	1	0.9043833801535954
710	1	1		710	1	0.9999999996078357		710	1	0.9999999939932446		710	1	0.9998470132847077			710	1	0.9999993944186375		710	1	0.316915		710	1	0.864898		710	1	0.9959364562513794
711	1	1		711	1	0.9999999990749209		711	1	0.9999999998803671		711	1	0.999999			711	1	0.9964894886675106		711	1	0.505374		711	1	0.6603190252288001		711	1	0.6802340646726893
712	1	1		712	1	0.9999999524943366		712	1	0.9999999999651153		712	1	0.9999996323380778			712	1	0.9999535888546848		712	1	0.436615		712	1	0.7780459353313913		712	1	0.9491243073460595
713	1	1		713	1	1		713	1	0.9999999996472368		713	1	0.9999999372887779			713	1	0.9999528572315923		713	1	0.216074		713	1	0.7390782124594961		713	1	0.9869211020919259
714	1	1		714	1	0.9999999529412169		714	1	0.9999999991892108		714	1	0.9999976803535473			714	1	0.9999993581656617		714	1	0.552905		714	1	0.9952972972397841		714	1	0.9996547176259831
715	1	1		715	1	0.9999998709489945		715	1	0.9999998624665417		715	1	0.9999974181344117			715	1	0.9982004738135349		715	1	0.567143		715	1	0.7042346156556493		715	1	0.8916289290337964
716	1	1		716	1	0.9999999849813485		716	1	0.9999907436357842		716	1	0.999964			716	1	0.9785341396007111		716	1	0.763711		716	1	0.8300008875097175		716	1	0.9897223154602093
717	1	1		717	1	0.9999917804049618		717	1	0.9999135922030445		717	1	0.9999478831152644			717	1	0.9972195702605898		717	1	0.10963		717	1	0.047739558565849195		717	1	0.026435609398018117
718	1	1		718	1	0.9999999942329917		718	1	0.9999487474962055		718	1	0.9999914028627253			718	1	0.7907814472846573		718	1	0.831906		718	1	0.999795		718	1	0.9993833035803514
719	1	1		719	1	0.9999999999873195		719	1	0.9999999999375802		719	1	0.9999997240112427			719	1	0.9760657881934997		719	1	0.859041		719	1	0.9659608290635143		719	1	0.9990455154660505
720	1	1		720	1	0.9999999816090375		720	1	0.9999997911978061		720	1	0.999998			720	1	0.9803603030617821		720	1	0.808801		720	1	0.8442761469685909		720	1	0.9925867867979145
721	1	1		721	1	0.9999999999352748		721	1	0.9999999960369486		721	1	0.9999918406027151			721	1	0.9908786141708079		721	1	0.252363		721	1	0.23925135548138793		721	1	0.827789
722	1	1		722	1	0.9999794788040143		722	1	0.9999989436678266		722	1	0.9999940445079222			722	1	0.9987744717657939		722	1	0.29859		722	1	0.8689898241394501		722	1	0.9836760605664048
723	1	1		723	1	0.9999382166842274		723	1	0.9999996984446747		723	1	0.9999176375253973			723	1	0.9984372185518948		723	1	0.263341		723	1	0.846613		723	1	0.9849570659817216
724	1	0.9999999999993736		724	1	0.9999999994903964		724	1	0.9999999837937996		724	1	0.9999944005250389			724	1	0.9999996871554031		724	1	0.37186		724	1	0.9918314082652253		724	1	0.9897425129314955
725	1	1		725	1	0.9999999968534092		725	1	0.9999998860389401		725	1	0.9999940912430201			725	1	0.9999998717299562		725	1	0.914675		725	1	0.9851230793603254		725	1	0.9941882568584496
726	1	1		726	1	0.9999999978673526		726	1	0.9999998547214505		726	1	0.999995			726	1	0.9999999460352699		726	1	0.985093		726	1	0.9927599737659838		726	1	0.9981688866061552
727	1	1		727	1	1		727	1	0.9999949067602224		727	1	0.9999994475575378			727	1	0.9991865601738658		727	1	0.715329		727	1	0.9560906181058356		727	1	0.9916474523091313
728	1	1		728	1	0.9999999999485772		728	1	0.9999999989515929		728	1	0.9999997437158745			728	1	0.9999963884960231		728	1	0.944567		728	1	0.9952709282331524		728	1	0.9886384467221307
729	1	1		729	1	0.9990437715190692		729	1	0.9999921577593406		729	1	0.9999998352377023			729	1	0.9999997758176616		729	1	0.915282		729	1	0.9573542307343391		729	1	0.9993420900913664
730	1	1		730	1	0.9999999998692265		730	1	0.9999999936430465		730	1	0.9999995053083379			730	1	0.9999933534987528		730	1	0.962452		730	1	0.9993184927406079		730	1	0.9967153734795733
731	1	0.9999999999999986		731	1	0.9999998596829478		731	1	0.9999451524841522		731	1	0.9999977550176791			731	1	0.9824658324790654		731	1	0.426435		731	1	0.9115029985926445		731	1	0.9792114105871927
732	1	0.9999999999999885		732	1	0.9999999999929478		732	1	0.9999999929857568		732	1	0.9999998963139081			732	1	0.9999999997802214		732	1	0.632884		732	1	0.9905282261214541		732	1	0.9991940083446462
733	1	1		733	1	0.9999999999114638		733	1	0.9999951774156398		733	1	0.9999976523352987			733	1	0.999999		733	1	0.924335		733	1	0.9986163042483687		733	1	0.9987775530587679
734	1	1		734	1	0.9999999999213034		734	1	0.9999999466816629		734	1	0.9999997780520565			734	1	0.9999999999143157		734	1	0.656148		734	1	0.9405996632685596		734	1	0.9760405056941261
735	1	0.9999999999999997		735	1	0.9999939075591588		735	1	0.9999812165647616		735	1	0.9999986673568569			735	1	0.999993		735	1	0.688251		735	1	0.9956172408622869		735	1	0.9993694044989642
736	1	0.9999999999999979		736	1	0.9999999505477386		736	1	0.9999993755175146		736	1	1			736	1	0.9977172596790085		736	1	0.107779		736	1	0.9369216583312443		736	1	0.9983436366917273
737	1	1		737	1	0.9999999997944304		737	1	0.9999999999983897		737	1	0.9999994685806703			737	1	0.9999927941482836		737	1	0.983741		737	1	0.9758433641964344		737	1	0.9965328369701905
738	1	1		738	1	1		738	1	0.9999999998012259		738	1	0.9999999540263764			738	1	0.9998642381271484		738	1	0.559231		738	1	0.9918359831443859		738	1	0.998776
739	1	1		739	1	0.9999999999999638		739	1	0.9999999998023877		739	1	0.9999999873784807			739	1	0.9999585264458493		739	1	0.157906		739	1	0.0447367		739	1	0.6885582903839332
740	1	1		740	1	0.9999999975796189		740	1	0.9999999999780607		740	1	0.9999991853764761			740	1	1		740	1	0.98234		740	1	0.9958421157421363		740	1	0.9996852173354434
741	1	1		741	1	1		741	1	0.9999999999996086		741	1	0.9999999993968672			741	1	0.9906469616517755		741	1	0.483946		741	1	0.9933754548469816		741	1	0.9993038774567786
742	1	0.9999999999999243		742	1	1		742	1	1		742	1	0.9999999999358306			742	1	0.998353		742	1	0.775845		742	1	0.9918398083436737		742	1	0.9997647493018524
743	1	0.9999999999999591		743	1	1		743	1	0.9999999999012913		743	1	0.9999999956347697			743	1	0.9999999941160075		743	1	0.996731		743	1	0.9998942018376691		743	1	0.9997660670919166
744	1	0.9999999999999997		744	1	0.9999996597092351		744	1	0.9999999974884295		744	1	0.9999997396522202			744	1	0.9999999998272795		744	1	0.933078		744	1	0.99971		744	1	0.9993459790937758
745	1	0.9999999999978806		745	1	0.9999999626767906		745	1	0.9999999999965419		745	1	0.9999999977344505			745	1	0.9999059010563662		745	1	0.698637		745	1	0.9967616693617521		745	1	0.9997735252530254
746	1	0.9999999999662479		746	1	0.9997400753740064		746	1	0.9999999927535019		746	1	0.9999993846702104			746	1	0.9388122435961357		746	1	0.172384		746	1	0.3751973737400613		746	1	0.3852295350710748
747	1	0.9999999999999896		747	1	0.9999999999865424		747	1	0.9999999999734922		747	1	1			747	1	0.9999999522631733		747	1	0.949609		747	1	0.9922343185274901		747	1	0.9915279332588389
748	1	1		748	1	0.9999999999493421		748	1	0.9999999999993322		748	1	0.9999999561379961			748	1	0.9999961861212218		748	1	0.98779		748	1	0.9963920881828751		748	1	0.9990334761085792
749	1	0.9999999999998921		749	1	0.9999999750504918		749	1	0.9999998643268396		749	1	0.9999998897778243			749	1	0.9993976944492344		749	1	0.239799		749	1	0.4971892265793933		749	1	0.4237911455376435
750	1	0.9999999999998883		750	1	0.9999999978597601		750	1	0.9999995698494772		750	1	0.9999999995984221			750	1	0.9951147744902376		750	1	0.126681		750	1	0.5972023592549548		750	1	0.9592708538871941
751	1	0.9999999999999993		751	1	0.9999999387198905		751	1	0.9999996871442514		751	1	0.9999999078653091			751	1	1		751	1	0.916539		751	1	0.9998497573838053		751	1	0.9996763836174486
752	1	1		752	1	0.9999999999999687		752	1	1		752	1	0.9999999999985753			752	1	0.99957		752	1	0.968797		752	1	0.9985000179953077		752	1	0.9998135553176467
753	1	1		753	1	1		753	1	1		753	1	0.9999999999999994			753	1	0.9813732051685673		753	1	0.984535		753	1	0.9998741996579479		753	1	0.9997482908873165
754	1	1		754	1	0.9999999999999953		754	1	1		754	1	0.9999999999999872			754	1	0.9999839914310787		754	1	0.483936		754	1	0.9320091074410529		754	1	0.9976394684172835
755	1	1		755	1	1		755	1	1		755	1	1			755	1	0.9999732751087184		755	1	0.994882		755	1	0.9998598087492957		755	1	0.9997083788738846
756	1	1		756	1	1		756	1	0.9999999999979948		756	1	0.9999999999943067			756	1	0.7189661854171299		756	1	0.481669		756	1	0.5932113710245714		756	1	0.993551
757	1	1		757	1	0.9999999999997022		757	1	0.9999999999996546		757	1	0.9999999999988494			757	1	0.9611587171591384		757	1	0.986141		757	1	0.9985870058220243		757	1	0.9996530178243271
758	1	1		758	1	0.9999999999931893		758	1	0.9999999999999938		758	1	0.9999999999992908			758	1	0.9998881009317793		758	1	0.312487		758	1	0.32039651649218676		758	1	0.6422214200198253
759	1	1		759	1	0.9999999994779248		759	1	0.9999999999999974		759	1	0.9999999999926148			759	1	0.9999411032330184		759	1	0.874335		759	1	0.9893783339111383		759	1	0.9962249043128518
760	1	1		760	1	0.9999999999999848		760	1	1		760	1	1			760	1	0.9983210796296478		760	1	0.988402		760	1	0.9999528569391398		760	1	0.9992485664969293
761	1	1		761	1	1		761	1	0.9999397196466522		761	1	0.9999999986858061			761	1	0.9992143257497468		761	1	0.292398		761	1	0.3129747434557525		761	1	0.3017139605946522
762	1	1		762	1	0.9999999999920478		762	1	0.9999999999995596		762	1	0.9999999998495994			762	1	0.9993475629363745		762	1	0.967928		762	1	0.9999091792966087		762	1	0.9997971170056282
763	1	1		763	1	0.9999999999308016		763	1	0.9999999994850907		763	1	0.9999999993288685			763	1	0.8301722075565747		763	1	0.691542		763	1	0.9715816050984768		763	1	0.9996733808703805
764	1	0.9999999990702103		764	1	0.9999999930612445		764	1	0.9999997272040121		764	1	0.9999999171124643			764	1	0.9979951658561781		764	1	0.17181		764	1	0.8215325380751353		764	1	0.9818739621302116
765	1	1		765	1	0.9999999997601813		765	1	0.9999999999999863		765	1	0.9999999997525064			765	1	0.9323865198507116		765	1	0.283168		765	1	0.8811564460440371		765	1	0.9993887559283609
766	1	1		766	1	0.9999999946722058		766	1	0.9999999999812041		766	1	0.9999999999730924			766	1	0.9985485276058769		766	1	0.27401		766	1	0.3885219795122304		766	1	0.5405417811047848
767	1	1		767	1	0.9999999999999976		767	1	0.9999999999999819		767	1	0.9999999999999961			767	1	0.9990900529199366		767	1	0.96147		767	1	0.9995828308100742		767	1	0.9980301846811998
768	1	1		768	1	0.9999999999086068		768	1	0.9999999999834168		768	1	0.9999999094671166			768	1	0.894925		768	1	0.433474		768	1	0.9831806989581134		768	1	0.999679
769	1	1		769	1	0.9999999999906963		769	1	0.9999999999999971		769	1	0.9999999999998008			769	1	0.9999970092060391		769	1	0.773443		769	1	0.9982602484756135		769	1	0.999084
770	1	1		770	1	0.9999999999929703		770	1	0.9999999999999994		770	1	0.9999999999999605			770	1	0.9999617730560559		770	1	0.816251		770	1	0.9990646130347672		770	1	0.9973134943442638
771	1	1		771	1	0.9999999999978333		771	1	0.9999999999999992		771	1	1			771	1	0.9758903512431937		771	1	0.989352		771	1	0.999573		771	1	0.9998289542631532
772	1	1		772	1	0.9999999999985152		772	1	0.9999999999999994		772	1	0.9999999999999886			772	1	0.9999938277638326		772	1	0.677026		772	1	0.9967980885543682		772	1	0.9992487527432043
773	1	0.9999999999999997		773	1	0.9999999975102726		773	1	0.9999999899813913		773	1	0.9999999994640131			773	1	0.7896405042356536		773	1	0.95328		773	1	0.9819365345568806		773	1	0.9988776453352259
774	1	1		774	1	1		774	1	1		774	1	0.9999999999999891			774	1	0.999992		774	1	0.997075		774	1	0.9999772255872045		774	1	0.9996558303580309
775	1	1		775	1	0.9999999999999981		775	1	1		775	1	1			775	1	0.9996665143810036		775	1	0.907281		775	1	0.998877		775	1	0.9970737182043832
776	1	1		776	1	1		776	1	0.9999999999804237		776	1	0.9999999997955915			776	1	0.9937764530421561		776	1	0.928249		776	1	0.998429		776	1	0.9992692663594109
777	1	1		777	1	0.9999999999997864		777	1	1		777	1	0.9999999998651858			777	1	0.9988196703178563		777	1	0.561036		777	1	0.9575932941318545		777	1	0.9859068414863398
778	1	0.9999999999999762		778	1	0.9999999996396354		778	1	0.9999999999718102		778	1	0.9999999976964286			778	1	0.9712188204028359		778	1	0.554539		778	1	0.5847630338703826		778	1	0.8204404730678713
779	1	0.9999999998887258		779	1	0.9999999999995998		779	1	0.9999999999999956		779	1	1			779	1	0.9819186982227659		779	1	0.389119		779	1	0.9936894731928676		779	1	0.9997944121860374
780	1	1		780	1	0.9999999999997815		780	1	0.9999999999952838		780	1	0.9999999999995178			780	1	0.7291436515870409		780	1	0.974933		780	1	0.9617114163307449		780	1	0.998937
781	1	1		781	1	1		781	1	1		781	1	0.9999999999470989			781	1	0.9723564453971102		781	1	0.286986		781	1	0.8877048502743625		781	1	0.9878052322335396
782	1	1		782	1	0.9999999999694119		782	1	0.9999999999968643		782	1	0.9999999894743101			782	1	0.9742149745447363		782	1	0.647613		782	1	0.9965444474799182		782	1	0.9995101388614087
783	1	1		783	1	1		783	1	1		783	1	0.9999999999999998			783	1	0.9999669798061221		783	1	0.998303		783	1	0.9999073018557987		783	1	0.9997880909628428
784	1	1		784	1	0.9999999999999989		784	1	1		784	1	0.9999999999999669			784	1	0.9993464830893791		784	1	0.993794		784	1	0.999955		784	1	0.9994267731350996
785	1	1		785	1	0.9999999999999989		785	1	0.9999999999999987		785	1	0.9999999999915798			785	1	0.9999473448970827		785	1	0.904459		785	1	0.9994765345569258		785	1	0.9922404297668065
786	1	1		786	1	0.9999999999961534		786	1	0.9999999999995802		786	1	0.9999999999999896			786	1	0.5936690457401407		786	1	0.278491		786	1	0.9869219584210069		786	1	0.9994955782638901
787	1	1		787	1	0.9999999998110327		787	1	1		787	1	0.9999999998897338			787	1	0.8864311391371106		787	1	0.282769		787	1	0.32429411208256775		787	1	0.6750059197821477
788	1	1		788	1	0.9999999999999992		788	1	0.9999999999999998		788	1	0.9999999999918334			788	1	0.9999248492621655		788	1	0.646422		788	1	0.9563118846676962		788	1	0.9627699585940303
789	1	1		789	1	0.9999999999889132		789	1	0.9999999999999998		789	1	1			789	1	0.9999918361595763		789	1	0.778314		789	1	0.9979570352686834		789	1	0.9991224094802218
790	1	1		790	1	0.9999999999069435		790	1	0.9999999999999724		790	1	0.9999999999998738			790	1	0.9999068103747275		790	1	0.844457		790	1	0.9854624652476256		790	1	0.9941591625380783
791	1	0.9999999999998795		791	1	0.9999999991978233		791	1	0.9999999999992261		791	1	0.9999999952917482			791	1	0.9742429659325815		791	1	0.979475		791	1	0.9927316188836257		791	1	0.991311
792	1	1		792	1	0.9999999999999477		792	1	0.9999999999999953		792	1	0.9999999999993392			792	1	0.9988591465033504		792	1	0.33541		792	1	0.9178821554609159		792	1	0.9852161842483113
793	1	0.9999999999997682		793	1	0.9999999997678177		793	1	0.9999999987773533		793	1	0.9999999999991358			793	1	0.3053999229676592		793	1	0.338901		793	1	0.9932623448531129		793	1	0.9995759093113488
794	1	1		794	1	0.9999999992842724		794	1	0.9999999998802579		794	1	0.9999999999950266			794	1	0.9993007398191909		794	1	0.226677		794	1	0.824046		794	1	0.9800659978040139
795	1	0.9999999999998261		795	1	0.9999999999746043		795	1	0.9999999996632651		795	1	0.9999999999982216			795	1	0.5940846623476176		795	1	0.469806		795	1	0.982822		795	1	0.9970844624824874
796	1	1		796	1	0.9999999999996104		796	1	0.9999999999999998		796	1	0.9999999999999872			796	1	0.9996834482903267		796	1	0.945775		796	1	0.9606653636838003		796	1	0.9811340938955367
797	1	1		797	1	0.9999999999292923		797	1	1		797	1	1			797	1	0.9999850373033055		797	1	0.907194		797	1	0.9997223491851183		797	1	0.9994908346956037
798	1	1		798	1	0.9999999999999768		798	1	0.9999999996363468		798	1	0.9999999999998802			798	1	0.9998588374656038		798	1	0.762177		798	1	0.9890426600144847		798	1	0.9925557903100849
799	1	1		799	1	0.9999999659875298		799	1	0.9999999999997936		799	1	0.9999999999291791			799	1	0.9998905066166376		799	1	0.975869		799	1	0.9999536399004014		799	1	0.9996993866160099
800	1	0.9999999999997098		800	1	0.9999994079131868		800	1	0.9999997932247789		800	1	0.9911830257227057			800	1	0.9999238816126179		800	1	0.207599		800	1	0.18898557380989067		800	1	0.13155781465974106
801	1	0.9999999999999951		801	1	0.9969476626776665		801	1	0.9977428564344089		801	1	0.9203882006344303			801	1	0.5117993580973357		801	1	0.681373		801	1	0.6345055467507255		801	1	0.9037065474762778
802	1	1		802	1	1		802	1	0.9999999858391633		802	1	0.9999999917805761			802	1	0.9999984100963144		802	1	0.931142		802	1	0.997382		802	1	0.9986945632098408
803	1	1		803	1	0.9999999999999978		803	1	0.9999999967972173		803	1	0.9999999895697937			803	1	0.9999954188672476		803	1	0.937893		803	1	0.9937709432674966		803	1	0.9984934470613318
804	1	1		804	1	0.9999999999998398		804	1	1		804	1	0.9999997559095778			804	1	1		804	1	0.960773		804	1	0.9923779583965632		804	1	0.998864
805	1	1		805	1	0.9999999999999071		805	1	0.9999999998469039		805	1	0.9999986610395697			805	1	0.9999241392715768		805	1	0.89474		805	1	0.9972436780294329		805	1	0.998744
806	1	1		806	1	1		806	1	0.9999999407750872		806	1	0.9999989028092685			806	1	0.9999999983149033		806	1	0.96391		806	1	0.8359611418753733		806	1	0.974228
807	1	1		807	1	0.9999999993719996		807	1	0.9999992677439523		807	1	0.9999999980179014			807	1	1		807	1	0.985628		807	1	0.9978231226355528		807	1	0.9995149877538648
808	1	0.9999999999999818		808	1	0.9999906710775046		808	1	0.9703734375296883		808	1	0.36827343429220466			808	1	0.9999979188830441		808	1	0.306073		808	1	0.749741		808	1	0.9165530195148692
809	1	1		809	1	1		809	1	0.9999970135132422		809	1	0.9999986253362171			809	1	0.9999822933707646		809	1	0.957651		809	1	0.9983233822817937		809	1	0.9986011651967601
810	1	1		810	1	0.9999999998337962		810	1	0.9999999408881007		810	1	0.9999994974188143			810	1	0.9999988218350916		810	1	0.631344		810	1	0.9795611063743909		810	1	0.9885989684809858
811	1	1		811	1	0.9999808140614425		811	1	0.9824997067218735		811	1	0.9974705129520852			811	1	0.9998717217615349		811	1	0.194081		811	1	0.0853129		811	1	0.037696899485133134
812	1	1		812	1	0.9986951339466975		812	1	0.9986527250022192		812	1	0.7644251479673174			812	1	0.9999996313556714		812	1	0.143669		812	1	0.4890182813784237		812	1	0.32952381985518253
813	1	1		813	1	0.9999999174294587		813	1	0.9994127961156257		813	1	0.9993053184137567			813	1	0.9990155165333816		813	1	0.448733		813	1	0.38795263203990743		813	1	0.5742937724286854
814	1	1		814	1	0.9999999988807473		814	1	0.9999999412261085		814	1	0.9998984471750937			814	1	0.9998562722561285		814	1	0.941954		814	1	0.9955492796987319		814	1	0.997842
815	1	1		815	1	0.9999951801054069		815	1	0.9999999423424648		815	1	0.9999872258733752			815	1	0.9999999676903675		815	1	0.894619		815	1	0.9970542482998932		815	1	0.9908826064368766
816	1	1		816	1	0.9999714553612472		816	1	0.9999998561658883		816	1	0.999984			816	1	0.9999961171618504		816	1	0.391659		816	1	0.942859		816	1	0.9632539705403252
817	1	1		817	1	0.9999999598511026		817	1	0.9999990390962727		817	1	0.9999933958995845			817	1	0.9999988825619603		817	1	0.415594		817	1	0.9896798073244866		817	1	0.9926737682594422
818	1	1		818	1	0.9999999961823207		818	1	0.9999999966515176		818	1	0.9999852671300421			818	1	1		818	1	0.797842		818	1	0.930533		818	1	0.9173534420757736
819	1	1		819	1	0.9998153428210141		819	1	0.9999999776077914		819	1	0.9999933563167738			819	1	1		819	1	0.909238		819	1	0.9981358457511829		819	1	0.9822603403373609
820	1	1		820	1	0.9999999878411028		820	1	0.9999999815145589		820	1	0.9999534555847291			820	1	0.9999998048474058		820	1	0.518064		820	1	0.9843971112531141		820	1	0.9269955795420474
821	1	0.9999999813484856		821	1	0.999997		821	1	0.999879		821	1	0.9931366260964144			821	1	0.9950040715158827		821	1	0.299663		821	1	0.28084676138179543		821	1	0.6041401972620177
822	1	1		822	1	0.9999999990747432		822	1	0.9999999830187954		822	1	0.9998426627158625			822	1	0.9999777241671842		822	1	0.922581		822	1	0.9937638412460762		822	1	0.9965830738275774
823	1	1		823	1	0.9994269361979792		823	1	0.9999999926364851		823	1	0.999991			823	1	0.9999999969427179		823	1	0.799408		823	1	0.9924527360711028		823	1	0.9420618311662746
824	1	1		824	1	0.9986371968909136		824	1	0.9999999712295347		824	1	0.9999943406024437			824	1	0.9999756955175723		824	1	0.159053		824	1	0.4690692686989373		824	1	0.7776417543324414
825	1	1		825	1	0.999998		825	1	0.9999999841623971		825	1	0.999978			825	1	0.9999983562937874		825	1	0.279109		825	1	0.5030669169064121		825	1	0.43574746759419924
826	1	0.9999999999999892		826	1	0.9999983226167684		826	1	0.9999819736860682		826	1	0.9992864066151198			826	1	0.9999544693831579		826	1	0.261252		826	1	0.6946970411883545		826	1	0.7442786718818974
827	1	1		827	1	0.9999999999999668		827	1	0.9999999894356582		827	1	0.9999999667342612			827	1	0.9999990909702577		827	1	0.847809		827	1	0.9968548724207277		827	1	0.9977559367938852
828	1	1		828	1	0.9999999999999681		828	1	0.9999999925700861		828	1	1			828	1	0.999998		828	1	0.859031		828	1	0.9973427455235763		828	1	0.9945564154945172
829	1	1		829	1	0.9999679236354179		829	1	0.9999984736092974		829	1	0.9993694242953441			829	1	0.808143		829	1	0.781332		829	1	0.9736645768399173		829	1	0.9836093460303278
830	1	1		830	1	0.9999981399744784		830	1	0.9999573568835737		830	1	0.9999838285193025			830	1	0.6792025193290027		830	1	0.253415		830	1	0.6879296439766356		830	1	0.9180071981785625
831	1	1		831	1	0.9999997164349564		831	1	0.9999839103862612		831	1	0.9999760077258587			831	1	0.9999410634163068		831	1	0.909088		831	1	0.9968292701684963		831	1	0.9519067807362762
832	1	1		832	1	0.9997863835700183		832	1	0.9999944501446859		832	1	0.9995305384418971			832	1	0.937689		832	1	0.725377		832	1	0.9552034735891127		832	1	0.5702321326250364
833	1	0.9999999999999207		833	1	0.9999993838916899		833	1	0.9999611508188929		833	1	0.9998772889951718			833	1	0.9999525298693368		833	1	0.236082		833	1	0.6411001760600075		833	1	0.6930655767449916
834	1	1		834	1	0.9999307305856044		834	1	0.9999981744865147		834	1	0.999688			834	1	0.2155697663802376		834	1	0.207038		834	1	0.18143776191529284		834	1	0.23737747827977215
835	1	1		835	1	0.9999999999999946		835	1	0.9999999551605676		835	1	0.9999999023146322			835	1	0.9998461653267163		835	1	0.673831		835	1	0.9866108411361154		835	1	0.9985190045298553
836	1	0.9999999999999972		836	1	1		836	1	0.9999943382279904		836	1	0.9999410135376999			836	1	0.9999517194099017		836	1	0.866134		836	1	0.9962449887865021		836	1	0.9155053544025464
837	1	1		837	1	0.9999999999999989		837	1	0.9999999933077993		837	1	0.9999999869175882			837	1	0.9999983072285834		837	1	0.916658		837	1	0.9981696887030951		837	1	0.997146
838	1	1		838	1	0.9999999851982768		838	1	0.9999929825569854		838	1	0.9999782310982631			838	1	0.8338409972034804		838	1	0.174962		838	1	0.8377867955584977		838	1	0.9381558910408263
839	1	1		839	1	0.9999995660195675		839	1	0.999831		839	1	0.9998790783242111			839	1	0.9676392984796338		839	1	0.15209		839	1	0.38419187731814214		839	1	0.5990040677366469
840	1	1		840	1	0.9999999999803889		840	1	0.9999999998937698		840	1	0.9999999944832787			840	1	0.999999		840	1	0.295251		840	1	0.29526721183510996		840	1	0.38126550250093694
841	1	1		841	1	1		841	1	0.9999999993901972		841	1	0.9999996401932474			841	1	0.9989268605035706		841	1	0.437533		841	1	0.3068050576671627		841	1	0.6663638435801691
842	1	1		842	1	0.9999999999999633		842	1	0.9999999997957986		842	1	0.9999999950961012			842	1	0.9990060035128201		842	1	0.676867		842	1	0.988071		842	1	0.9966629860611752
843	1	1		843	1	0.9999999999999934		843	1	0.9999999999712049		843	1	0.9999999655972386			843	1	0.9997534843985413		843	1	0.976108		843	1	0.9943909280949356		843	1	0.9945877305907964
844	1	1		844	1	0.9999999987750522		844	1	0.9999999999171907		844	1	1			844	1	0.9963104753159862		844	1	0.587009		844	1	0.6833875240076187		844	1	0.8704582975197518
845	1	1		845	1	0.9999999999998804		845	1	1		845	1	0.9999997276081266			845	1	0.3598560149123923		845	1	0.774045		845	1	0.9960353182659342		845	1	0.9992994664746309
846	1	1		846	1	0.9999999999996625		846	1	0.9999999999999013		846	1	0.9999999997561972			846	1	0.9998572926020654		846	1	0.962601		846	1	0.9828850233151644		846	1	0.9981473608105719
847	1	1		847	1	0.9999999999335344		847	1	0.9999999999441825		847	1	0.9999999636387953			847	1	0.9999453099424475		847	1	0.967353		847	1	0.9684949982903188		847	1	0.9974204372955907
848	1	1		848	1	0.9999999999999959		848	1	0.9999999999602612		848	1	0.9999999984242639			848	1	0.9961647237698608		848	1	0.673023		848	1	0.9622715289037139		848	1	0.9968128602508514
849	1	1		849	1	0.9999999999131458		849	1	0.9999999995719593		849	1	0.9999999204677968			849	1	0.9999924077475265		849	1	0.902995		849	1	0.9876082518076599		849	1	0.9970734236994773
850	1	1		850	1	0.9999999999999654		850	1	0.9999999999870886		850	1	0.9999999349890674			850	1	0.28849209383906094		850	1	0.189205		850	1	0.9720040871934229		850	1	0.9974542693553636
851	1	1		851	1	1		851	1	0.9999999999967876		851	1	0.9999999405030708			851	1	0.9998752115442934		851	1	0.73663		851	1	0.9937269769172756		851	1	0.9992534703147193
852	1	1		852	1	1		852	1	0.9999999999671513		852	1	0.9999999515400191			852	1	0.9981796528414402		852	1	0.402715		852	1	0.9814150099723385		852	1	0.9949422638789628
853	1	1		853	1	0.9999999998553933		853	1	0.9999999997067531		853	1	0.9999999991246545			853	1	0.9919020192977646		853	1	0.733902		853	1	0.9357807144323237		853	1	0.9886918961773042
854	1	1		854	1	0.9999999999810804		854	1	0.9999999995336186		854	1	0.9999986724100187			854	1	0.9997771682115595		854	1	0.198913		854	1	0.6813492024980179		854	1	0.8455082624419523
855	1	1		855	1	1		855	1	0.9999999982525328		855	1	0.9999993958651757			855	1	0.9998009125804432		855	1	0.972464		855	1	0.9989085992246185		855	1	0.9989083543631373
856	1	1		856	1	0.9999999999645047		856	1	0.9999999999978241		856	1	0.9999999977618919			856	1	0.9973319298286693		856	1	0.867322		856	1	0.9752606741639238		856	1	0.9865339148713039
857	1	1		857	1	0.9999999999970024		857	1	0.9999999999928446		857	1	1			857	1	0.9999963061554069		857	1	0.17319		857	1	0.759995		857	1	0.9030044864027664
858	1	1		858	1	0.9999999999963595		858	1	0.9999999996837776		858	1	0.9999999979566747			858	1	0.9993515571125454		858	1	0.709506		858	1	0.9866922510119237		858	1	0.9947765392596829
859	1	1		859	1	1		859	1	0.9999999999936777		859	1	0.9999998857277064			859	1	0.9998979020858757		859	1	0.60354		859	1	0.5642095256523902		859	1	0.8899416517742321
860	1	1		860	1	0.9999999999879101		860	1	0.9999999999691414		860	1	0.9999998719902494			860	1	0.9994859772620125		860	1	0.797069		860	1	0.9951738562806907		860	1	0.9985730729916369
861	1	1		861	1	0.9999999999993318		861	1	0.9999999999921783		861	1	0.9999999813810687			861	1	0.9999534577033112		861	1	0.993906		861	1	0.9985363515023514		861	1	0.9989569646253386
862	1	1		862	1	0.9999999999992315		862	1	0.9999999999930995		862	1	0.9999997068237961			862	1	0.9999966691281922		862	1	0.905565		862	1	0.9522122497848652		862	1	0.9415158799820839
863	1	1		863	1	0.9999999999987271		863	1	0.9999999999991054		863	1	0.9999999955338919			863	1	0.9999134755065947		863	1	0.963777		863	1	0.9989008194109663		863	1	0.998507
864	1	1		864	1	1		864	1	0.9999999998764711		864	1	0.9999999212557701			864	1	0.9998379396943377		864	1	0.57695		864	1	0.46251829245356435		864	1	0.5014226043578976
865	1	1		865	1	0.9999999999964279		865	1	0.9999999999873874		865	1	0.9999997913690069			865	1	0.9998726694753117		865	1	0.957267		865	1	0.9994481004243607		865	1	0.9986666197040172
866	1	1		866	1	0.9999999911115336		866	1	0.9999999995379315		866	1	0.9999993715562174			866	1	0.998998		866	1	0.265402		866	1	0.8902546314070179		866	1	0.9791394070681598
867	1	1		867	1	0.9999999999962208		867	1	0.9999999999930884		867	1	0.9999999957520251			867	1	0.9996243916854148		867	1	0.8564		867	1	0.9983358506882525		867	1	0.999237
868	1	1		868	1	1		868	1	0.9999999999925456		868	1	0.9999999990533084			868	1	0.9999757605474008		868	1	0.745042		868	1	0.9954978003616095		868	1	0.9996774605511451
869	1	1		869	1	0.9999999999999863		869	1	0.9999999999894102		869	1	0.9999999983282603			869	1	0.999933		869	1	0.950691		869	1	0.994204		869	1	0.998623
870	1	1		870	1	0.9999999999982779		870	1	0.9999999986090825		870	1	0.9999988992724602			870	1	0.9994720648935121		870	1	0.814099		870	1	0.994188		870	1	0.9965271900962412
871	1	1		871	1	0.9999999999645047		871	1	0.9999999999978241		871	1	0.9999999977618919			871	1	0.9973319298286693		871	1	0.867322		871	1	0.9752606741639238		871	1	0.9865339148713039
872	1	1		872	1	0.9999999999965351		872	1	1		872	1	0.9999999787611001			872	1	0.9995030297133047		872	1	0.970227		872	1	0.9892409012243938		872	1	0.9956348243836873
873	1	1		873	1	0.9999999999999994		873	1	0.9999999999973125		873	1	0.9999999992694834			873	1	1		873	1	0.852407		873	1	0.9979630688130648		873	1	0.9997735952484461
874	1	1		874	1	0.9999999999999957		874	1	0.9999999999967601		874	1	0.9999999974889813			874	1	0.9999164560281634		874	1	0.99418		874	1	0.9987056029383005		874	1	0.9995798476486096
875	1	1		875	1	1		875	1	0.9999999999001993		875	1	0.9999994923457965			875	1	0.9991075527096983		875	1	0.343533		875	1	0.6583514998944184		875	1	0.8976985120106985
876	1	1		876	1	0.9999999999999994		876	1	0.9999999999968039		876	1	0.9999999948749302			876	1	0.9999244785927044		876	1	0.601451		876	1	0.9745543205999164		876	1	0.9955281699468524
877	1	1		877	1	0.9999999999999994		877	1	0.9999999999695286		877	1	0.9999999038592515			877	1	0.9999994982114391		877	1	0.991166		877	1	0.9997633112547721		877	1	0.9994881391915575
878	1	1		878	1	1		878	1	0.9999999999719541		878	1	0.9999995544488023			878	1	0.9999089527371949		878	1	0.831184		878	1	0.9243197442473504		878	1	0.9962586871988709
879	1	1		879	1	0.9999999999999629		879	1	0.9999999999846351		879	1	1			879	1	0.9998996854469955		879	1	0.630574		879	1	0.9806360057506492		879	1	0.9962083208074404
880	1	1		880	1	0.9999999991819556		880	1	0.9999999938348694		880	1	0.9999997217586818			880	1	0.9999959421477208		880	1	0.93515		880	1	0.9973158951779401		880	1	0.9982655814755063
881	1	1		881	1	0.9999999999999951		881	1	0.9999999999779718		881	1	0.9999999728800746			881	1	0.9989528382937666		881	1	0.996709		881	1	0.9992147511055876		881	1	0.9990863798121744
882	1	1		882	1	0.9999999999997903		882	1	0.9999999997872088		882	1	0.9999999386244997			882	1	0.9999622423416669		882	1	0.62511		882	1	0.9980084623256251		882	1	0.9993393580488438
883	1	1		883	1	0.9999999955641125		883	1	0.9999999999845757		883	1	1			883	1	0.9999821521795578		883	1	0.990279		883	1	0.9996404961357819		883	1	0.9996086144727262
884	1	1		884	1	0.9999999999985991		884	1	0.9999999999942667		884	1	0.9999999988787187			884	1	0.9999839513259864		884	1	0.830555		884	1	0.9973348452272106		884	1	0.9993343643123295
885	1	1		885	1	0.9999999999777646		885	1	0.9999999997602306		885	1	0.9999999054332082			885	1	0.9999919018232509		885	1	0.90006		885	1	0.9729931005782333		885	1	0.9975260834277768
886	1	1		886	1	0.9999999998942027		886	1	0.9999999991814927		886	1	0.9999999974205966			886	1	0.9997938015055248		886	1	0.980131		886	1	0.9992552875665301		886	1	0.996115
887	1	1		887	1	0.9999999295440541		887	1	0.9999999732209081		887	1	0.9999993637110836			887	1	0.9991634217493617		887	1	0.189029		887	1	0.5511724481486533		887	1	0.8654732216428342
888	1	1		888	1	0.9999999998424076		888	1	0.9999999999826118		888	1	0.9999999937867136			888	1	0.9998771571839143		888	1	0.523937		888	1	0.8295158404566096		888	1	0.9809204623418999
889	1	1		889	1	0.9999999999962456		889	1	0.9999999987078766		889	1	0.9999978178122577			889	1	0.9820271177527927		889	1	0.953991		889	1	0.991693		889	1	0.996497
890	1	1		890	1	0.9999999999999989		890	1	0.9999999999758974		890	1	1			890	1	0.9999657052179388		890	1	0.902776		890	1	0.999646		890	1	0.9995268170269273
891	1	1		891	1	0.9999999999954285		891	1	0.9999999983898724		891	1	0.9999996439253296			891	1	0.9993756120602777		891	1	0.951108		891	1	0.9989687047669047		891	1	0.999436
892	1	1		892	1	0.9999999999999308		892	1	0.9999999999827321		892	1	0.9999999694072769			892	1	0.9997405005353042		892	1	0.998705		892	1	0.9998609492526614		892	1	0.9972314766685297
893	1	1		893	1	0.9999999993396316		893	1	0.9999999982227551		893	1	0.9999991353382628			893	1	0.9999422225749496		893	1	0.591227		893	1	0.7572089163476993		893	1	0.9827836441973401
894	1	1		894	1	0.9999999998925237		894	1	0.9999999991218681		894	1	0.9999997568960777			894	1	0.9999717582063746		894	1	0.964226		894	1	0.9984378617408178		894	1	0.9990153341959405
895	1	1		895	1	0.9999999975030643		895	1	0.9999999938935431		895	1	0.9999999063330026			895	1	0.9952981895157189		895	1	0.418777		895	1	0.6818541347463514		895	1	0.6854780566606895
896	1	1		896	1	0.9999992868661817		896	1	0.9999999645053779		896	1	0.9999247224209163			896	1	0.8518974574288671		896	1	0.792689		896	1	0.6119871554953455		896	1	0.5427973663889243
897	1	1		897	1	0.9999999999998829		897	1	0.9999999997159084		897	1	0.9999998578536048			897	1	0.9995610440790252		897	1	0.578135		897	1	0.7770412205434883		897	1	0.9587104364257314
898	1	1		898	1	0.9999999999999297		898	1	0.9999999999935661		898	1	0.9999999968304828			898	1	0.988466		898	1	0.98383		898	1	0.9996330228414116		898	1	0.9982845163418214
899	1	1		899	1	0.9999999999987024		899	1	1		899	1	0.9999999919487574			899	1	0.9997918613580401		899	1	0.972204		899	1	0.9992512071954417		899	1	0.9997305342574203
900	1	1		900	1	0.9999999877484685		900	1	0.9999999996502823		900	1	0.9999999196479522			900	1	0.9995541627382837		900	1	0.783453		900	1	0.8207555378884746		900	1	0.862284
901	1	1		901	1	0.9999738044263194		901	1	0.9999420314225655		901	1	0.9998476475626474			901	1	0.9830284896554694		901	1	0.447531		901	1	0.6231638218185165		901	1	0.9840839064356304
902	1	1		902	1	0.9999999756869182		902	1	0.9999999935938132		902	1	0.9999999762414631			902	1	0.9942199110659219		902	1	0.824602		902	1	0.9845372292497321		902	1	0.9838485999085731
903	1	1		903	1	0.9999839669477605		903	1	0.9999999811255462		903	1	0.9999999763309558			903	1	0.9999718107188216		903	1	0.176065		903	1	0.32001784008748585		903	1	0.18058496808628832
904	1	1		904	1	0.9999983810432517		904	1	0.9999998097544326		904	1	0.9999987878709861			904	1	0.9999291176981208		904	1	0.38065		904	1	0.5462446346657301		904	1	0.759837
905	1	0.9999999999999682		905	1	0.9999999695814288		905	1	0.9999618593154528		905	1	0.999977			905	1	0.9842477725029605		905	1	0.900598		905	1	0.9895812598312778		905	1	0.9987709315496083
906	1	1		906	1	0.9999995057301598		906	1	0.9999998677863131		906	1	0.9999928060807176			906	1	0.993183		906	1	0.200566		906	1	0.32595168255317747		906	1	0.7432773102110766
907	1	1		907	1	0.9999999999962742		907	1	1		907	1	0.9999971816174922			907	1	0.9999998884033823		907	1	0.368418		907	1	0.8104166360281447		907	1	0.8347064451194732
908	1	1		908	1	0.9998715166945594		908	1	0.9993962583304927		908	1	0.9999996940954025			908	1	1		908	1	0.723931		908	1	0.993723		908	1	0.9951617273983708
909	1	1		909	1	0.9999997320084876		909	1	0.9999962206950721		909	1	0.9999999047748378			909	1	0.9999999891910937		909	1	0.661305		909	1	0.9807667788505223		909	1	0.982495
910	1	1		910	1	0.9999999890741444		910	1	0.999999		910	1	0.9999965054409579			910	1	0.9999999622846665		910	1	0.560624		910	1	0.7990717109585834		910	1	0.9567493560257949
911	1	1		911	1	0.9999998698354685		911	1	0.9999990816467064		911	1	0.9999998032256335			911	1	0.9999999208049135		911	1	0.744219		911	1	0.989793		911	1	0.9912442594953244
912	1	1		912	1	0.9999999999970969		912	1	0.9999999999492325		912	1	0.9999999905519108			912	1	0.9997935714507384		912	1	0.0773839		912	1	0.1667584714821758		912	1	0.19403053671854475
913	1	1		913	1	0.9999999993981148		913	1	0.9999999193145553		913	1	0.9999998520726915			913	1	0.9603304098068155		913	1	0.387313		913	1	0.6467740042154743		913	1	0.41652265106067116
914	1	1		914	1	1		914	1	0.9999999979771974		914	1	0.9999999961733967			914	1	0.9999998292253983		914	1	0.162667		914	1	0.60349		914	1	0.980138
915	1	1		915	1	0.9999999993389534		915	1	0.9999999998781876		915	1	0.9999999590757277			915	1	1		915	1	0.593441		915	1	0.976119		915	1	0.9981476682696769
916	1	1		916	1	0.9999999999844229		916	1	0.9999999999657072		916	1	0.9999999994712241			916	1	0.9999999960953826		916	1	0.88206		916	1	0.9984464455727055		916	1	0.9989920037191607
917	1	1		917	1	0.9999974535072272		917	1	0.9999024701634543		917	1	0.9995117482908227			917	1	0.999588		917	1	0.310562		917	1	0.703291		917	1	0.9519355953193138
918	1	0.9999856916505413		918	1	0.8137080803143963		918	1	0.971099		918	1	0.9628595642843117			918	1	0.3191181907625102		918	1	0.140699		918	1	0.18353303586944023		918	1	0.26516335689125736
919	1	1		919	1	0.9999992338790367		919	1	0.9999845448100411		919	1	0.9999383331978948			919	1	0.944187		919	1	0.407354		919	1	0.49407876378930876		919	1	0.5453730777011174
920	1	1		920	1	0.9999999767198775		920	1	0.9999999555464856		920	1	0.9999989631808855			920	1	0.9997379122105795		920	1	0.811749		920	1	0.9866707029916039		920	1	0.9977348311599977
921	1	1		921	1	0.9999999045855956		921	1	0.9999981956756211		921	1	0.9999710636604977			921	1	0.992965		921	1	0.0911795		921	1	0.2562459207005118		921	1	0.3277018195986898
922	1	1		922	1	0.9999983591281586		922	1	0.9999692380389791		922	1	0.9999796214916764			922	1	0.9981514033065901		922	1	0.500932		922	1	0.39333560639874543		922	1	0.8337892394093915
923	1	1		923	1	1		923	1	0.9999868079517388		923	1	0.99998			923	1	0.9818705217855755		923	1	0.341855		923	1	0.5613306272943076		923	1	0.8165564199743063
924	1	0.9998735650336815		924	1	0.9872505467833688		924	1	0.9624285594774967		924	1	0.9771364770950312			924	1	0.9827882179090593		924	1	0.393026		924	1	0.37683880803887637		924	1	0.43607000690487896
925	1	1		925	1	0.9999999966361249		925	1	0.9999989873324748		925	1	0.9999872990275951			925	1	0.9996507874702538		925	1	0.208912		925	1	0.1735724475218105		925	1	0.12156374912723412
926	1	1		926	1	0.9999999999962742		926	1	1		926	1	0.9999971816174922			926	1	0.9999998884033823		926	1	0.368418		926	1	0.8104166360281447		926	1	0.8347064451194732
927	1	0.9999961477891215		927	1	0.9565917704205268		927	1	0.9485585327301495		927	1	0.986858			927	1	0.5841056964549337		927	1	0.103601		927	1	0.10732488013697551		927	1	0.31362935305866374
928	1	1		928	1	0.9999995736238796		928	1	0.9999854068510453		928	1	0.9998466393800246			928	1	0.9795541852175954		928	1	0.695985		928	1	0.918028		928	1	0.9904330912715807
929	1	1		929	1	0.9999999998824702		929	1	0.9999999935558952		929	1	0.9999998803679746			929	1	0.9999798079402389		929	1	0.476299		929	1	0.9769917088807398		929	1	0.9874311080267346
930	1	0.9999999999996976		930	1	0.9999999047070288		930	1	0.9999994405055663		930	1	0.9999991100314182			930	1	0.9137508274470543		930	1	0.941379		930	1	0.9986426397934548		930	1	0.9996793712109855
931	1	0.9999999999141667		931	1	0.9861635125461677		931	1	0.997211		931	1	0.999064			931	1	0.999976		931	1	0.083985		931	1	0.2135299626034795		931	1	0.3548506671638531
932	1	0.9999999999999997		932	1	0.9999848977797006		932	1	0.9999974791314773		932	1	0.9999989252946077			932	1	0.9999848875360816		932	1	0.285118		932	1	0.29179789536872364		932	1	0.4472220353610872
933	1	1		933	1	0.9999999999302221		933	1	0.9999999786127353		933	1	0.9999996063916674			933	1	0.9999463046597413		933	1	0.458174		933	1	0.993704		933	1	0.9912701659344803
934	1	0.9999999999999818		934	1	0.9999999372717063		934	1	0.9999920632135867		934	1	0.9999409092533326			934	1	0.9997387186181815		934	1	0.107214		934	1	0.13919206331424142		934	1	0.4731046253954031
935	1	1		935	1	0.9999999996915161		935	1	0.9999999945281736		935	1	0.9999998501469887			935	1	0.9891150801037081		935	1	0.325683		935	1	0.6202460381950128		935	1	0.8558315350359101
936	1	1		936	1	0.9999999964390346		936	1	0.9999979579829413		936	1	0.999994			936	1	0.9999206891367616		936	1	0.568501		936	1	0.9932632644620507		936	1	0.9988330583680429
937	1	1		937	1	0.9999999998068467		937	1	0.9999999878446382		937	1	0.9999981919296557			937	1	0.9999598466748412		937	1	0.332087		937	1	0.7442958392680156		937	1	0.9813171259890688
938	1	1		938	1	0.9999999999727764		938	1	0.9999999091971372		938	1	0.9999999342139275			938	1	0.9972050971277705		938	1	0.80678		938	1	0.9960376540767991		938	1	0.9994461253191123
939	1	1		939	1	0.9999999980542993		939	1	1		939	1	0.9999996935853704			939	1	0.9999499997061536		939	1	0.884476		939	1	0.9941894005567091		939	1	0.9940506641844384
940	1	1		940	1	0.9999999926869306		940	1	0.9999999983079975		940	1	0.9999999625572809			940	1	0.9998230825717532		940	1	0.225666		940	1	0.3282348757686026		940	1	0.2743517975567506
941	1	1		941	1	1		941	1	0.9999999876540746		941	1	0.9999996756541043			941	1	0.9996652656877371		941	1	0.264998		941	1	0.9436923631607076		941	1	0.9857604236432591
942	1	1		942	1	0.9999999999864765		942	1	0.9999999990857812		942	1	0.9999999656516582			942	1	0.9999951506900305		942	1	0.494672		942	1	0.9281950543710593		942	1	0.9958884741268167
943	1	1		943	1	0.9999999993491415		943	1	0.9999999752917766		943	1	0.9999993978193485			943	1	0.9981320453834028		943	1	0.549166		943	1	0.21282614339829203		943	1	0.5188942050141454
944	1	1		944	1	0.9999912731669173		944	1	0.9988408161420339		944	1	0.9999238677258301			944	1	0.9999676607486035		944	1	0.401584		944	1	0.735036		944	1	0.31295891202795445
945	1	0.9999999999999993		945	1	0.9999999974534689		945	1	0.9999976794136403		945	1	0.9997931767499032			945	1	0.9999951755635822		945	1	0.868539		945	1	0.9525292651372612		945	1	0.9892482676518344
946	1	0.9999999999989375		946	1	0.9999994275594025		946	1	0.9999713202318044		946	1	0.9932713666276761			946	1	0.9999994166084698		946	1	0.818151		946	1	0.6981439791313239		946	1	0.9306510956674527
947	1	1		947	1	0.9999998186667916		947	1	0.9999588797420427		947	1	0.9998399529850028			947	1	0.9948326655188608		947	1	0.726244		947	1	0.983218		947	1	0.9829334434761287
948	1	0.9999999999999993		948	1	0.9999999914665274		948	1	0.9999996656739725		948	1	0.999835			948	1	0.9999988941483194		948	1	0.951946		948	1	0.8925340229445096		948	1	0.941855
949	1	0.9999999999959894		949	1	0.9999990420877345		949	1	0.9997270890602465		949	1	0.9981870448419236			949	1	0.9999999955500424		949	1	0.502523		949	1	0.8636557693073889		949	1	0.8079670879186014
950	1	0.9999999999999997		950	1	0.9999999969782314		950	1	0.9990670825478741		950	1	0.9980694886327574			950	1	0.9999999967501347		950	1	0.788081		950	1	0.6784630647946499		950	1	0.8886127689572093
951	1	0.9999771013652691		951	1	0.756597		951	1	0.9936640269013097		951	1	0.948324			951	1	0.9939787137799095		951	1	0.847071		951	1	0.9619847623585774		951	1	0.9994695430018502
952	1	0.9999999999999997		952	1	0.9999999613622088		952	1	0.831688		952	1	0.8909622697607832			952	1	0.9999999969888699		952	1	0.967103		952	1	0.7104301077500556		952	1	0.8759021429773005
953	1	0.9999999999964548		953	1	0.9999784559985971		953	1	0.9999983757984984		953	1	0.9999999120575658			953	1	0.997465		953	1	0.990679		953	1	0.9922041953383954		953	1	0.9933527680421185
954	1	0.9999999999999993		954	1	0.9999999992434968		954	1	0.9999907753402408		954	1	0.9996324644979554			954	1	0.9999999903754688		954	1	0.975644		954	1	0.9755577546820081		954	1	0.9877123440396306
955	1	0.9999999999999958		955	1	0.9999999991706857		955	1	0.9999942502440353		955	1	0.9995858845063744			955	1	0.9999949860717334		955	1	0.500704		955	1	0.6878564034040718		955	1	0.9324729845748311
956	1	0.9999999997722961		956	1	0.8839410108234668		956	1	0.9861643150357368		956	1	0.9603452123749434			956	1	0.6077971140197662		956	1	0.356662		956	1	0.31949449340187214		956	1	0.33439925565346307
957	1	0.9999999999999997		957	1	0.9999999988537908		957	1	0.999977		957	1	0.9993428610346625			957	1	0.9999999957448624		957	1	0.988819		957	1	0.9012260114782553		957	1	0.9749353292629119
958	1	0.9999999955530898		958	1	0.9870389780243527		958	1	0.9823187507911952		958	1	0.993648			958	1	0.9983411731549617		958	1	0.387226		958	1	0.17799199772014368		958	1	0.4692662598678385
959	1	1		959	1	0.9999999961732914		959	1	0.9999714855312691		959	1	0.9971332670784688			959	1	0.9999999998643829		959	1	0.922976		959	1	0.991099		959	1	0.954999
960	1	0.9999999878559488		960	1	0.9996885225035592		960	1	0.9998766349890184		960	1	0.9972890723302994			960	1	0.9056059321548817		960	1	0.934259		960	1	0.981376		960	1	0.8944929627297785
961	1	0.9999999999640125		961	1	0.9999994317397165		961	1	0.5118618629550632		961	1	0.5784924119784004			961	1	0.9999994197793333		961	1	0.911405		961	1	0.7844671695003822		961	1	0.9330440494998805
962	1	0.9999999999999986		962	1	0.9999999983526573		962	1	0.9999968746872585		962	1	0.9995746283686743			962	1	0.9999999959194229		962	1	0.986421		962	1	0.94995		962	1	0.9836168746741322
963	1	1		963	1	0.9999999999912534		963	1	0.9999999789940092		963	1	0.9999837900712263			963	1	0.9999992772300826		963	1	0.45272		963	1	0.8663334103711953		963	1	0.9744893972154182
964	1	1		964	1	0.9999999999995004		964	1	0.9999999991404772		964	1	0.9999998981724556			964	1	0.9999995308885867		964	1	0.96357		964	1	0.9936481645901174		964	1	0.9970475331750119
965	1	1		965	1	0.9999999997362807		965	1	0.9999999556343362		965	1	0.9999993490474718			965	1	0.9998923823114739		965	1	0.875899		965	1	0.9995465561875982		965	1	0.9978759960622892
966	1	1		966	1	0.9999999999965705		966	1	0.9999993703465903		966	1	0.999979			966	1	0.9999866823726105		966	1	0.667461		966	1	0.9894165036974674		966	1	0.9872721911928888
967	1	1		967	1	0.9999999998539331		967	1	0.9999946436240685		967	1	0.9999535938827337			967	1	0.9947296699117127		967	1	0.205191		967	1	0.27603798045725897		967	1	0.2224952033297398
968	1	1		968	1	0.9999999999975713		968	1	1		968	1	0.9999988813092905			968	1	0.9999992900183005		968	1	0.989025		968	1	0.9997852142720239		968	1	0.9981328967402507
969	1	1		969	1	0.9999999999981041		969	1	0.9999944963664883		969	1	0.9999969444036754			969	1	0.9999879189809598		969	1	0.981402		969	1	0.9974754452472708		969	1	0.9962000584401562
970	1	1		970	1	0.9999999959753018		970	1	0.9999976128625598		970	1	0.9995527506191282			970	1	0.9999204473086578		970	1	0.826388		970	1	0.9971596763339832		970	1	0.9708468297380944
971	1	1		971	1	1		971	1	0.9999999970454816		971	1	1			971	1	0.9999969042006593		971	1	0.991913		971	1	0.9985328897038175		971	1	0.9951821432373258
972	1	1		972	1	0.9999999999978147		972	1	0.9999999866184046		972	1	0.9999995904655613			972	1	0.9999981670635879		972	1	0.995462		972	1	0.9971959298792052		972	1	0.9988919178075976
973	1	1		973	1	0.9999999999977606		973	1	0.9999999914790196		973	1	0.9999795765696947			973	1	0.9999394091555528		973	1	0.208008		973	1	0.8486724007521305		973	1	0.9965810708062253
974	1	1		974	1	0.9999999999999987		974	1	1		974	1	0.9999999933284034			974	1	0.9985080093290953		974	1	0.983068		974	1	0.9993184966036395		974	1	0.9970477654851481
975	1	1		975	1	0.9999999998306781		975	1	0.9999983855822638		975	1	0.9999783921338485			975	1	0.9958060218752343		975	1	0.278509		975	1	0.7951397312225018		975	1	0.98433
976	1	1		976	1	0.9999999999923176		976	1	0.9999998456781017		976	1	0.9999997673221284			976	1	0.9994786200977173		976	1	0.77182		976	1	0.7260258249268681		976	1	0.9496054714574254
977	1	1		977	1	0.9999999999999793		977	1	0.9999999960444921		977	1	0.9999998150766529			977	1	0.9999994221730641		977	1	0.982879		977	1	0.9995696491645072		977	1	0.9974530109152063
978	1	1		978	1	0.9999999997879268		978	1	1		978	1	0.9999994311688051			978	1	0.9999696849647467		978	1	0.981243		978	1	0.9988164586292029		978	1	0.996053
979	1	1		979	1	0.9999999999452712		979	1	0.999999		979	1	0.999993			979	1	0.9999914930745419		979	1	0.836715		979	1	0.9792579187964534		979	1	0.9949819141171218
980	1	1		980	1	0.9999997068454173		980	1	0.9999992209987779		980	1	0.999977			980	1	0.9999122475007254		980	1	0.323845		980	1	0.8501197807797277		980	1	0.8448278610136771
981	1	1		981	1	0.9999999999993715		981	1	0.9999999965813924		981	1	0.9999998755745613			981	1	0.999996		981	1	0.970327		981	1	0.9988243338734476		981	1	0.997338
982	1	1		982	1	1		982	1	0.9999999987624212		982	1	0.9999998383018368			982	1	0.9999977100669392		982	1	0.991738		982	1	0.998029		982	1	0.9973312301442644
983	1	1		983	1	1		983	1	0.9999999777962423		983	1	0.9999988272867438			983	1	0.9999992039009802		983	1	0.991327		983	1	0.997723		983	1	0.9918018795190344
984	1	1		984	1	0.9999999999998589		984	1	0.9999997402939061		984	1	0.9999986037506617			984	1	0.9999990729375233		984	1	0.983412		984	1	0.998188		984	1	0.9977143265268067
985	1	1		985	1	0.9999999999992407		985	1	0.9999999650246703		985	1	1			985	1	0.99989		985	1	0.982477		985	1	0.9995776571626208		985	1	0.9969042663478321
986	1	1		986	1	0.9999999999999845		986	1	0.9999999999708611		986	1	0.9999999475655341			986	1	0.9999890410052136		986	1	0.977153		986	1	0.9956110375861245		986	1	0.9961921204585972
987	1	1		987	1	0.9999999998834244		987	1	0.9999980223533859		987	1	0.999964			987	1	0.9998869234137394		987	1	0.913613		987	1	0.8217522625518401		987	1	0.9624162878324913
988	1	1		988	1	1		988	1	0.9999998968015952		988	1	0.999995			988	1	0.9999934667200313		988	1	0.258001		988	1	0.3340380948704329		988	1	0.6149077222646849
989	1	1		989	1	0.9999999999999845		989	1	0.9999999997248311		989	1	0.9999999769545106			989	1	0.9999988299133714		989	1	0.846496		989	1	0.9918559924283278		989	1	0.9961313327306568
990	1	0.9999999999999927		990	1	0.9999999286408016		990	1	0.9999789255988576		990	1	0.9998142336747283			990	1	0.9999720045799089		990	1	0.292586		990	1	0.8860647946482303		990	1	0.9695976000293578
991	1	1		991	1	0.9999999999962919		991	1	0.9999999948741678		991	1	0.9999989538669471			991	1	0.9999620125142796		991	1	0.875052		991	1	0.992358		991	1	0.9961847575570696
992	1	1		992	1	0.9999999999341278		992	1	0.9999999997639799		992	1	0.9999999141159185			992	1	0.9999999172820268		992	1	0.984163		992	1	0.9941010140101082		992	1	0.9903547675601632
993	1	1		993	1	0.9999999999950008		993	1	0.9999999779108396		993	1	0.9999997287787039			993	1	0.9999994666276806		993	1	0.9845		993	1	0.9837681643795796		993	1	0.9958010322479683
994	1	1		994	1	0.9999999999942428		994	1	0.9999999824199635		994	1	0.999999			994	1	0.9999997163757638		994	1	0.977499		994	1	0.99491		994	1	0.9975686350377588
995	1	1		995	1	0.9999999999999891		995	1	1		995	1	0.9999996548169332			995	1	0.9999890530319009		995	1	0.908212		995	1	0.9969442430186842		995	1	0.9963242629191497
996	1	1		996	1	0.9999999999969795		996	1	0.9999999955644281		996	1	1			996	1	0.999734		996	1	0.533229		996	1	0.8976537386455685		996	1	0.9185715673819661
997	1	1		997	1	0.9999999999731186		997	1	1		997	1	0.9999997119452025			997	1	0.9999940522063294		997	1	0.969988		997	1	0.9926932463944852		997	1	0.9933357070092227
998	1	1		998	1	0.9999999890949468		998	1	0.9999998462668788		998	1	0.9999922957102003			998	1	0.9999999233686309		998	1	0.867485		998	1	0.9970789961647188		998	1	0.9973960328860811
999	1	1		999	1	0.9999999999870192		999	1	0.9999999973716678		999	1	0.9999973135770611			999	1	0.9999888458577528		999	1	0.47324		999	1	0.9778464491310416		999	1	0.991593
1000	1	1		1000	1	0.9999999999577475		1000	1	0.99993		1000	1	0.9999997995741233			1000	1	0.9997109756773948		1000	1	0.343524		1000	1	0.30666601556574746		1000	1	0.2623405076527414
1001	1	1		1001	1	0.9914959794458668		1001	1	0.8055660008382468		1001	1	0.9999090611061466			1001	1	0.999998		1001	1	0.888608		1001	1	0.8857047821122004		1001	1	0.7212465683767738
1002	1	1		1002	1	0.9999999968449569		1002	1	0.9997856353919623		1002	1	0.9999607593255452			1002	1	0.9999335988786178		1002	1	0.964407		1002	1	0.9505490781862777		1002	1	0.9521355981063165
1003	1	1		1003	1	0.9999657930079147		1003	1	0.9762207851636192		1003	1	0.9999943011910967			1003	1	0.9999999999437634		1003	1	0.67848		1003	1	0.9401175939225266		1003	1	0.6572203659578707
1004	1	1		1004	1	0.9999999999992996		1004	1	0.9999999351545786		1004	1	0.9999996461131976			1004	1	0.9999877150201946		1004	1	0.878288		1004	1	0.9934760875433956		1004	1	0.9996035867541389
1005	1	1		1005	1	1		1005	1	0.9999999999986711		1005	1	0.9999999999951495			1005	1	0.994672		1005	1	0.923647		1005	1	0.9928971133372019		1005	1	0.985125
1006	1	1		1006	1	1		1006	1	1		1006	1	0.9999999998743835			1006	1	0.9758769273041022		1006	1	0.905581		1006	1	0.9929363716034776		1006	1	0.9464785567162062
1007	1	1		1007	1	0.9999999955911895		1007	1	0.9999999927693446		1007	1	0.9999994777768427			1007	1	0.999998		1007	1	0.797331		1007	1	0.6929614788507418		1007	1	0.9626502935921463
1008	1	1		1008	1	0.9999896174094356		1008	1	0.9999652210568692		1008	1	0.9999999351785172			1008	1	0.9999999969711605		1008	1	0.946684		1008	1	0.733478		1008	1	0.9244394756307673
1009	1	1		1009	1	0.9999999955147137		1009	1	0.9999997271767632		1009	1	0.9999929243476677			1009	1	0.9999805128909784		1009	1	0.705127		1009	1	0.9762864967364527		1009	1	0.9314921665584747
1010	1	1		1010	1	0.9999999747546974		1010	1	1		1010	1	0.9999998790897247			1010	1	0.9991166694825012		1010	1	0.98468		1010	1	0.9901366867725714		1010	1	0.9740126627708223
1011	1	1		1011	1	0.9999999859730255		1011	1	0.9999999863451278		1011	1	0.9999998653925862			1011	1	0.9638183342188612		1011	1	0.940098		1011	1	0.9883279032268927		1011	1	0.9778
1012	1	1		1012	1	0.9999999867619991		1012	1	0.9999988862573496		1012	1	0.9999998415176279			1012	1	0.9999931378791577		1012	1	0.564608		1012	1	0.5715450397040261		1012	1	0.9617398218292939
1013	1	1		1013	1	0.9999997221517428		1013	1	0.999536		1013	1	1			1013	1	0.999981		1013	1	0.615948		1013	1	0.9969025064291677		1013	1	0.9736954346651665
1014	1	1		1014	1	0.9999999994946495		1014	1	0.9999993049826423		1014	1	0.9999999861830353			1014	1	0.9999969936393601		1014	1	0.148406		1014	1	0.25546668732467687		1014	1	0.8960839428175337
1015	1	1		1015	1	0.9999999999981812		1015	1	0.9999956798442421		1015	1	0.9999987178543204			1015	1	0.9986775133130549		1015	1	0.543823		1015	1	0.9319001870283784		1015	1	0.5596990617213944
1016	1	0.9999999999999696		1016	1	0.9999950623891508		1016	1	0.999816		1016	1	0.9999965685852703			1016	1	0.9999226146696601		1016	1	0.467091		1016	1	0.9179932314606704		1016	1	0.9685649603661187
1017	1	1		1017	1	0.9999999994886717		1017	1	0.9999791980019174		1017	1	0.9999999826261851			1017	1	0.9992730829972363		1017	1	0.0949921		1017	1	0.025644688654590006		1017	1	0.14619521290231235
1018	1	1		1018	1	0.9999999998442386		1018	1	0.9999990537181961		1018	1	0.9999998683584834			1018	1	0.9985980832069948		1018	1	0.630766		1018	1	0.9360703730999398		1018	1	0.8397014047622673
1019	1	1		1019	1	0.9999999994281152		1019	1	0.9999999432993505		1019	1	1			1019	1	0.9998416739956538		1019	1	0.538489		1019	1	0.7269158386600704		1019	1	0.6038137512177778
1020	1	1		1020	1	1		1020	1	0.9999999929484051		1020	1	0.9999384833032351			1020	1	0.9835326262920097		1020	1	0.168616		1020	1	0.10607305585183653		1020	1	0.2958728777302098
1021	1	0.9999999999999997		1021	1	0.9999704567134335		1021	1	0.9999997383029404		1021	1	0.8191581808118227			1021	1	0.9999998993799342		1021	1	0.493508		1021	1	0.7934625937029698		1021	1	0.9201637012604306
1022	1	1		1022	1	0.9999998685864575		1022	1	0.9999999996836534		1022	1	0.9999965245977842			1022	1	0.9999671803294445		1022	1	0.479917		1022	1	0.7236499159127686		1022	1	0.8730495897174739
1023	1	1		1023	1	0.9999999993962873		1023	1	0.9999990629762301		1023	1	0.9999999843531815			1023	1	0.9999971152480557		1023	1	0.107677		1023	1	0.3907653612661414		1023	1	0.6674912272760015
1024	1	1		1024	1	0.9999999999832302		1024	1	0.9999999946989999		1024	1	0.9999999820332821			1024	1	0.9999163665436894		1024	1	0.893925		1024	1	0.9873393526640761		1024	1	0.9409175875998869
1025	1	1		1025	1	0.9999999999601681		1025	1	0.9999915367462322		1025	1	0.9999682596480166			1025	1	0.9990856181733718		1025	1	0.419385		1025	1	0.9217419094346373		1025	1	0.7833686969933108
1026	1	1		1026	1	0.9999999997136766		1026	1	0.9999999610601582		1026	1	0.9999989290415038			1026	1	0.9980606459086823		1026	1	0.595002		1026	1	0.9614693182807729		1026	1	0.9468237371097902
1027	1	1		1027	1	0.9999999576365555		1027	1	0.9999983893404175		1027	1	0.9999536941315639			1027	1	0.9995082567748584		1027	1	0.232991		1027	1	0.23683221698932042		1027	1	0.18669312512439284
1028	1	1		1028	1	0.9999999987422429		1028	1	1		1028	1	0.9999935280038701			1028	1	0.9966113661933461		1028	1	0.590279		1028	1	0.8925814959980267		1028	1	0.8349431399035682
1029	1	1		1029	1	0.9999999856903062		1029	1	0.9999989848981574		1029	1	0.9999955051482117			1029	1	0.9533849831507039		1029	1	0.825079		1029	1	0.9428229461952828		1029	1	0.9686390552751801
1030	1	1		1030	1	0.9999999909061917		1030	1	0.9999999716526116		1030	1	0.9999991965880498			1030	1	0.9988224570944926		1030	1	0.8853		1030	1	0.8413102293619253		1030	1	0.9705437818570865
1031	1	1		1031	1	0.9999999618726708		1031	1	0.9999995287115795		1031	1	0.9994783695227191			1031	1	0.9999392397430318		1031	1	0.328123		1031	1	0.4777521232656232		1031	1	0.31880761787079465
1032	1	1		1032	1	0.9999999988791249		1032	1	0.9999902633819887		1032	1	0.9999964543414799			1032	1	0.9988900907046109		1032	1	0.853438		1032	1	0.7764275891305632		1032	1	0.9661240555233526
1033	1	1		1033	1	0.9999998962834463		1033	1	0.9999998790311617		1033	1	0.999979			1033	1	0.9966281776692347		1033	1	0.631735		1033	1	0.9121156509957582		1033	1	0.9616945587040663
1034	1	1		1034	1	0.9999987716052884		1034	1	0.9999694527590544		1034	1	0.999997			1034	1	0.9984471320600478		1034	1	0.324049		1034	1	0.098894		1034	1	0.3565586373268258
1035	1	1		1035	1	1		1035	1	0.9999999925099157		1035	1	0.9999966841859365			1035	1	0.9991243545913534		1035	1	0.691455		1035	1	0.7687020513312115		1035	1	0.6430368051624824
1036	1	1		1036	1	0.9973677639459279		1036	1	0.9987271004576079		1036	1	0.9893059616277791			1036	1	0.9997489430239099		1036	1	0.169692		1036	1	0.10221680349832973		1036	1	0.18034323293585094
1037	1	1		1037	1	0.9999995696275066		1037	1	0.9997364323653886		1037	1	0.999431			1037	1	0.999438		1037	1	0.506159		1037	1	0.8042982971485141		1037	1	0.6954378867550673
1038	1	1		1038	1	0.9999999969651318		1038	1	0.9999999610404092		1038	1	0.9999501109381064			1038	1	0.9988786362546411		1038	1	0.221404		1038	1	0.1406911298615805		1038	1	0.0551959
1039	1	1		1039	1	0.9999999999885432		1039	1	0.9999999164372382		1039	1	0.9999994924626169			1039	1	0.9987698487476148		1039	1	0.639776		1039	1	0.9386521544982142		1039	1	0.9992291710049085
1040	1	1		1040	1	0.9999999997376963		1040	1	0.9999999386196324		1040	1	0.9999999460256502			1040	1	0.9999218905394979		1040	1	0.702981		1040	1	0.998813		1040	1	0.7545391309724103
1041	1	1		1041	1	0.9999999999106002		1041	1	0.9999999447173522		1041	1	0.9999999394169752			1041	1	0.9999997970450135		1041	1	0.895887		1041	1	0.9828967561991142		1041	1	0.604865
1042	1	1		1042	1	0.9999999999979371		1042	1	0.9999995971512612		1042	1	0.9999999990371005			1042	1	1		1042	1	0.682506		1042	1	0.7550614537524278		1042	1	0.9795725244878976
1043	1	1		1043	1	0.9999999999955773		1043	1	0.9999999994820249		1043	1	0.9999991530623219			1043	1	0.9999958095265483		1043	1	0.922042		1043	1	0.994354		1043	1	0.9974301900627357
1044	1	1		1044	1	0.9999999846638501		1044	1	0.9999999061748842		1044	1	0.9999996605599608			1044	1	0.9999820567820574		1044	1	0.595915		1044	1	0.9632895518687073		1044	1	0.9217223179813265
1045	1	1		1045	1	0.9999999993146225		1045	1	0.9999999967723159		1045	1	0.9999993998601839			1045	1	0.990231		1045	1	0.245131		1045	1	0.0927275		1045	1	0.22943388974940077
1046	1	1		1046	1	0.9999999999966657		1046	1	0.9999999769099297		1046	1	0.9999999501654275			1046	1	0.9999994562623873		1046	1	0.774245		1046	1	0.9875231203709686		1046	1	0.9167864315811259
1047	1	1		1047	1	0.9999995724257662		1047	1	0.9996548896694013		1047	1	1			1047	1	0.9999983977753902		1047	1	0.553837		1047	1	0.740346		1047	1	0.9807673936597335
1048	1	1		1048	1	0.9999999998597027		1048	1	0.9999998745766554		1048	1	0.999995			1048	1	0.980997		1048	1	0.814185		1048	1	0.9343344729721759		1048	1	0.7178505593447041
1049	1	1		1049	1	0.9999999206860118		1049	1	0.9999987939912698		1049	1	0.9999999904185922			1049	1	0.9989614456447554		1049	1	0.601336		1049	1	0.9484422378914381		1049	1	0.9902688450072343
1050	1	1		1050	1	0.9999999942724861		1050	1	0.8506697329895496		1050	1	1			1050	1	0.9965134197283281		1050	1	0.058711		1050	1	0.15185383108685796		1050	1	0.39577028950875626
1051	1	1		1051	1	0.9999999999087524		1051	1	0.9999999956573092		1051	1	0.9999999772916183			1051	1	0.9999996094991619		1051	1	0.852051		1051	1	0.9965933797257922		1051	1	0.9936109423281678
1052	1	0.9999999999999997		1052	1	0.9999978370896118		1052	1	0.9972958239721315		1052	1	0.9993229167561063			1052	1	0.9018882091868385		1052	1	0.368488		1052	1	0.19260936243064403		1052	1	0.2547082109318769
1053	1	1		1053	1	0.9999999929278298		1053	1	0.9999988598669067		1053	1	0.9999999975781262			1053	1	0.9999991384316977		1053	1	0.949625		1053	1	0.9755948812107313		1053	1	0.975157
1054	1	1		1054	1	0.9999999969149663		1054	1	0.9999997657070325		1054	1	0.9999952918566859			1054	1	0.9999981982079709		1054	1	0.389726		1054	1	0.501623		1054	1	0.8023387114580635
1055	1	1		1055	1	0.9999999997369795		1055	1	0.9999999659458784		1055	1	0.9999999983180209			1055	1	0.9999999693670126		1055	1	0.842359		1055	1	0.9922877520197159		1055	1	0.9785833103800111
1056	1	1		1056	1	0.9999999999117033		1056	1	0.9999999856891223		1056	1	0.9999999898792676			1056	1	0.9999997140676279		1056	1	0.552462		1056	1	0.9794090083792363		1056	1	0.961465
1057	1	1		1057	1	1		1057	1	0.9999999999964636		1057	1	0.9999999997720835			1057	1	0.9798833662293129		1057	1	0.906551		1057	1	0.9928146509410927		1057	1	0.9653250322187809
1058	1	1		1058	1	0.9999999999998649		1058	1	0.9999999998398426		1058	1	0.9999999992806895			1058	1	0.9954922144438317		1058	1	0.522021		1058	1	0.9878028336004984		1058	1	0.9555892391125215
1059	1	1		1059	1	0.9999999999999989		1059	1	0.9999999997972853		1059	1	0.9999999999659569			1059	1	0.9996992840810214		1059	1	0.977803		1059	1	0.9916263407328358		1059	1	0.9940351308050819
1060	1	1		1060	1	0.9999999999999987		1060	1	0.9999999999996657		1060	1	0.9999999974600536			1060	1	0.9999911199901995		1060	1	0.829778		1060	1	0.9372710543952211		1060	1	0.9670827412176631
1061	1	1		1061	1	0.9999998364015907		1061	1	0.9999999994163894		1061	1	0.9999998764705991			1061	1	0.7252381664928922		1061	1	0.142047		1061	1	0.9177277852233704		1061	1	0.9923417777060174
1062	1	0.999999		1062	1	0.8617531900523953		1062	1	0.8189804746676712		1062	1	0.9762344159616583			1062	1	0.9445032714989606		1062	1	0.244767		1062	1	0.3359646414497892		1062	1	0.38483612195656614
1063	1	1		1063	1	0.9999999999999929		1063	1	0.9999999999892722		1063	1	0.9999999998989821			1063	1	0.9984114451029378		1063	1	0.189651		1063	1	0.7863058039492488		1063	1	0.984837
1064	1	1		1064	1	0.9999999999971086		1064	1	0.9999999996127128		1064	1	1			1064	1	0.8887513138024795		1064	1	0.423382		1064	1	0.9329972813746643		1064	1	0.9489983591273344
1065	1	1		1065	1	0.9999999999676786		1065	1	0.9999999996627585		1065	1	0.9999998272202582			1065	1	0.9960027222293069		1065	1	0.111879		1065	1	0.18608391122155984		1065	1	0.0697717
1066	1	0.999995		1066	1	0.9996722139935291		1066	1	0.9999085969307041		1066	1	0.9999800139742412			1066	1	0.9973575117536919		1066	1	0.158444		1066	1	0.4526973919541413		1066	1	0.5877791370430647
1067	1	1		1067	1	0.9999999999752949		1067	1	0.9999999840241403		1067	1	0.9999999375532918			1067	1	0.9899795363329383		1067	1	0.767867		1067	1	0.9858148317232589		1067	1	0.9998108379437367
1068	1	1		1068	1	0.9999999999955069		1068	1	0.999998		1068	1	0.9999999906790185			1068	1	0.5687079876069439		1068	1	0.279203		1068	1	0.21144247339891087		1068	1	0.534289
1069	1	1		1069	1	0.9999999999999964		1069	1	1		1069	1	0.9999999999917655			1069	1	0.9999484441374665		1069	1	0.775427		1069	1	0.9778944478980864		1069	1	0.998147
1070	1	1		1070	1	0.9999999999999398		1070	1	0.9999999985503552		1070	1	0.9999999958191923			1070	1	0.9995694883231123		1070	1	0.472906		1070	1	0.9881098740557576		1070	1	0.9371816824844018
1071	1	0.9999989225505249		1071	1	0.9997982440993339		1071	1	0.9445910630623086		1071	1	0.9999832377279435			1071	1	0.9996332847131911		1071	1	0.627136		1071	1	0.1296331611959547		1071	1	0.49661332340439945
1072	1	1		1072	1	0.9999999999999953		1072	1	0.9999999993181828		1072	1	0.9999999999955583			1072	1	0.9999234933560851		1072	1	0.979301		1072	1	0.999277		1072	1	0.9919893566820063
1073	1	1		1073	1	1		1073	1	0.9999999400158718		1073	1	0.9999999712558757			1073	1	0.998836		1073	1	0.783403		1073	1	0.9387542494557692		1073	1	0.9899024675339705
1074	1	0.9999999951094932		1074	1	0.9931998834652912		1074	1	0.9958873615933335		1074	1	0.9975088945321214			1074	1	0.996638		1074	1	0.731145		1074	1	0.5102727429081594		1074	1	0.4964939492760739
1075	1	1		1075	1	0.9999999999999929		1075	1	0.9999999999715679		1075	1	0.9999999999696623			1075	1	0.9999885684644017		1075	1	0.76282		1075	1	0.9993188967303224		1075	1	0.998682
1076	1	1		1076	1	0.9999999999908172		1076	1	0.9999999909988594		1076	1	0.9999999998666356			1076	1	0.9972687800719845		1076	1	0.911553		1076	1	0.9627001882558027		1076	1	0.9913583706056754
1077	1	1		1077	1	0.9999999999999998		1077	1	0.9999999999943171		1077	1	0.9999999998751757			1077	1	0.9999682041840912		1077	1	0.915971		1077	1	0.9904258074007203		1077	1	0.9875067268415164
1078	1	1		1078	1	1		1078	1	0.9999999999999922		1078	1	0.9999999999822359			1078	1	0.9999670359338084		1078	1	0.93839		1078	1	0.9981830080311963		1078	1	0.9961424739924368
1079	1	1		1079	1	0.9999999999996216		1079	1	0.9999999997657218		1079	1	0.9999980654890027			1079	1	0.9977306792785559		1079	1	0.920818		1079	1	0.9986801309547699		1079	1	0.9994166183416491
1080	1	1		1080	1	1		1080	1	0.9999999981552995		1080	1	0.9999999999813438			1080	1	0.9989744184149432		1080	1	0.904819		1080	1	0.949686		1080	1	0.9984249456010746
1081	1	1		1081	1	0.9999999999999998		1081	1	0.9999999999976267		1081	1	0.9999999999692514			1081	1	0.9999846161262996		1081	1	0.979874		1081	1	0.9993000626985638		1081	1	0.9914989236964235
1082	1	1		1082	1	1		1082	1	0.9999999999988747		1082	1	1			1082	1	0.9998507489719739		1082	1	0.958718		1082	1	0.9995836482797122		1082	1	0.9645761300690022
1083	1	1		1083	1	0.9999999999948673		1083	1	0.9999999986115083		1083	1	0.9999999997508929			1083	1	0.9999975112356275		1083	1	0.524174		1083	1	0.8522264988380749		1083	1	0.9964004741445014
1084	1	1		1084	1	1		1084	1	0.9999999999979888		1084	1	0.9999999998747972			1084	1	0.9999915171590434		1084	1	0.594529		1084	1	0.9740974120894654		1084	1	0.9879059562846916
1085	1	1		1085	1	1		1085	1	0.9999999999883428		1085	1	0.9999999999990808			1085	1	0.9999987164621622		1085	1	0.913205		1085	1	0.9987354713453159		1085	1	0.9961991154770872
1086	1	1		1086	1	0.9999999999992996		1086	1	0.9999999351545786		1086	1	0.9999996461131976			1086	1	0.9999877150201946		1086	1	0.878288		1086	1	0.9934760875433956		1086	1	0.9996035867541389
1087	1	1		1087	1	1		1087	1	0.9999999990234546		1087	1	0.9999999999190383			1087	1	0.9634873934495165		1087	1	0.960984		1087	1	0.998731		1087	1	0.9987576760410294
1088	1	1		1088	1	0.9999999999999905		1088	1	0.9999999999579576		1088	1	0.9999999970763862			1088	1	0.9985425677022296		1088	1	0.859224		1088	1	0.9714192292296462		1088	1	0.9965319450197128
1089	1	0.9999999982688818		1089	1	0.9621247183919601		1089	1	0.26835352228370213		1089	1	0.1348607915170445			1089	1	0.9997327204696274		1089	1	0.229365		1089	1	0.4735179233453832		1089	1	0.18598842036208754
1090	1	1		1090	1	0.9999999999946074		1090	1	0.9999996704520819		1090	1	0.9999952166643145			1090	1	0.999983		1090	1	0.905557		1090	1	0.964896		1090	1	0.9983708446054721
1091	1	1		1091	1	0.9999999999999009		1091	1	0.9999999997215613		1091	1	0.9999999983691744			1091	1	0.9999835802867433		1091	1	0.730591		1091	1	0.7755072976641407		1091	1	0.9258845513702209
1092	1	1		1092	1	1		1092	1	0.9999999999969322		1092	1	0.9999999921717542			1092	1	0.9999973776164753		1092	1	0.714705		1092	1	0.9590940049829074		1092	1	0.9869607574333866
1093	1	1		1093	1	0.9999999999999998		1093	1	0.9999999999955511		1093	1	0.9999999998587726			1093	1	0.999991		1093	1	0.981147		1093	1	0.9991956497656583		1093	1	0.9954314618747376
1094	1	1		1094	1	1		1094	1	0.9999999999999031		1094	1	0.9999999999840405			1094	1	0.9999913251068031		1094	1	0.948177		1094	1	0.997409		1094	1	0.9980242682003666
1095	1	0.9999963971468783		1095	1	0.3698294244832235		1095	1	0.25832242119575494		1095	1	0.3740068251719347			1095	1	0.9596870693475387		1095	1	0.128454		1095	1	0.19684289836274602		1095	1	0.23287877700805765
1096	1	1		1096	1	1		1096	1	0.9999999999998925		1096	1	1			1096	1	0.9999917956317832		1096	1	0.985185		1096	1	0.9993316812580216		1096	1	0.99259
1097	1	1		1097	1	1		1097	1	0.9999999999991013		1097	1	1			1097	1	0.9897755570850523		1097	1	0.977048		1097	1	0.993561		1097	1	0.9951804148364092
1098	1	1		1098	1	0.9999999999999932		1098	1	0.9999999999983239		1098	1	0.9999999048725385			1098	1	0.9948754006129712		1098	1	0.268875		1098	1	0.5300404129903137		1098	1	0.9792285782496923
1099	1	1		1099	1	1		1099	1	0.9999999999046401		1099	1	0.9999999999709862			1099	1	0.8213583729826106		1099	1	0.969756		1099	1	0.9990156660469599		1099	1	0.9827358602340228
1100	1	1		1100	1	1		1100	1	0.9999999999999679		1100	1	0.9999999996806512			1100	1	0.9999462107724231		1100	1	0.956367		1100	1	0.9976997099230407		1100	1	0.99711
1101	1	1		1101	1	0.9999999627518358		1101	1	0.9999999544486735		1101	1	0.9999911580252849			1101	1	0.9997733359495907		1101	1	0.225109		1101	1	0.43962172728092325		1101	1	0.8777808009772191
1102	1	0.9999999999999997		1102	1	0.9999999652662306		1102	1	0.9999999818638359		1102	1	0.9999898796632131			1102	1	0.9999739711901412		1102	1	0.415596		1102	1	0.924933		1102	1	0.996669
1103	1	1		1103	1	0.9999999999986446		1103	1	0.9999999973653362		1103	1	0.9999999906867604			1103	1	0.9999890600944179		1103	1	0.991826		1103	1	0.9955064627005199		1103	1	0.9995838832470754
1104	1	0.9999999999999961		1104	1	1		1104	1	0.9999997665057708		1104	1	0.9999993993300585			1104	1	0.9984380687605311		1104	1	0.969138		1104	1	0.9638115042599906		1104	1	0.9982170537663989
1105	1	0.9999999999973669		1105	1	0.9999999999469623		1105	1	0.9999998144445046		1105	1	0.999987			1105	1	0.99984		1105	1	0.999848		1105	1	0.9930070577751672		1105	1	0.999518
1106	1	0.9999999998879378		1106	1	0.9999999946464265		1106	1	0.999998		1106	1	0.9999999769380598			1106	1	0.9999996873547614		1106	1	0.927334		1106	1	0.9746582319801012		1106	1	0.9992949831557018
1107	1	0.9999999999994696		1107	1	0.9999999999980134		1107	1	0.9999999965602511		1107	1	0.9999999946552717			1107	1	0.9999982471479808		1107	1	0.992014		1107	1	0.9934372880250351		1107	1	0.9975570926759755
1108	1	0.9999999999999676		1108	1	0.9999997540109696		1108	1	0.9999936948317322		1108	1	0.9999999134633387			1108	1	0.999953		1108	1	0.591267		1108	1	0.9611114450916795		1108	1	0.9958806804314971
1109	1	1		1109	1	0.9999997453265858		1109	1	0.9999999250417119		1109	1	0.9999972196931854			1109	1	0.9990234238989765		1109	1	0.988337		1109	1	0.9905365651322962		1109	1	0.9970676591812855
1110	1	0.9999999970706185		1110	1	0.9999999883203035		1110	1	0.9999980366829027		1110	1	0.9999999961027369			1110	1	0.999963		1110	1	0.973185		1110	1	0.98798		1110	1	0.9991156865699753
1111	1	1		1111	1	1		1111	1	0.9999994429155397		1111	1	0.9999983871826494			1111	1	0.9997049665960415		1111	1	0.809983		1111	1	0.8587049884677669		1111	1	0.9846957213719192
1112	1	0.9999999999983719		1112	1	0.9999999998325791		1112	1	0.9999998187821908		1112	1	0.9999999963476779			1112	1	0.9999998981352604		1112	1	0.990289		1112	1	0.9983326423731814		1112	1	0.9975130982248479
1113	1	1		1113	1	0.9999999999988037		1113	1	0.9999998745437891		1113	1	0.9999999718192053			1113	1	0.9999982757942859		1113	1	0.111114		1113	1	0.5994041880284754		1113	1	0.9713386747830166
1114	1	1		1114	1	1		1114	1	0.9999999999519226		1114	1	0.9999999252732825			1114	1	0.9990540207238854		1114	1	0.979118		1114	1	0.999219		1114	1	0.9995831306561278
1115	1	1		1115	1	0.9999999999682301		1115	1	0.9999999155283694		1115	1	0.9999997493934267			1115	1	0.9999718036743882		1115	1	0.832142		1115	1	0.9925078062937401		1115	1	0.9989375944098041
1116	1	1		1116	1	0.9999999997854722		1116	1	0.9999999926518133		1116	1	0.9999999549366407			1116	1	0.9999998379549188		1116	1	0.974238		1116	1	0.9993539311163485		1116	1	0.996749
1117	1	1		1117	1	0.9999999999988574		1117	1	0.9999999859350833		1117	1	0.9999999426830376			1117	1	0.9998925340099722		1117	1	0.98362		1117	1	0.9993749166922691		1117	1	0.9995258246855797
1118	1	1		1118	1	0.9999999999948542		1118	1	0.9999999985919336		1118	1	0.9999999815993127			1118	1	0.9996271700298632		1118	1	0.944702		1118	1	0.9985796095395516		1118	1	0.9996390361112942
1119	1	1		1119	1	0.9999999996111611		1119	1	0.9999999996451342		1119	1	0.9999735997713567			1119	1	0.9937116443023992		1119	1	0.93088		1119	1	0.992805		1119	1	0.9973493929862473
1120	1	1		1120	1	0.9999999999997009		1120	1	0.9999999985302986		1120	1	0.9999999700994787			1120	1	0.9992151563036613		1120	1	0.977828		1120	1	0.9991517966056752		1120	1	0.9996897656064213
1121	1	1		1121	1	0.9999999999962605		1121	1	0.9999999996413739		1121	1	1			1121	1	0.9993654901980846		1121	1	0.991205		1121	1	0.998025		1121	1	0.9990530593924102
1122	1	1		1122	1	0.9999999999976513		1122	1	0.9999999982805168		1122	1	0.9999999520815793			1122	1	0.99801		1122	1	0.960168		1122	1	0.9987332941059973		1122	1	0.9997035184624987
1123	1	1		1123	1	0.9999999889485396		1123	1	0.9999988179796956		1123	1	0.9999919784744418			1123	1	0.9999970409582195		1123	1	0.312097		1123	1	0.5711720268048802		1123	1	0.9419895167275099
1124	1	1		1124	1	0.9999999999872641		1124	1	0.9999999972483082		1124	1	0.9999998225823982			1124	1	0.9969567782184998		1124	1	0.985592		1124	1	0.9981166774045424		1124	1	0.9980778361748425
1125	1	1		1125	1	0.9999999999951406		1125	1	0.9999999899628078		1125	1	0.999996			1125	1	0.9999982231294645		1125	1	0.943097		1125	1	0.9948580051177637		1125	1	0.9969495386426273
1126	1	0.9999999998437384		1126	1	0.9999993101236718		1126	1	0.9999988831254457		1126	1	0.9999313359112799			1126	1	0.9391560379840768		1126	1	0.953908		1126	1	0.9692052842682168		1126	1	0.9937418294600282
1127	1	0.9999999965429179		1127	1	0.9999960184608757		1127	1	0.9999891200829822		1127	1	0.9999279310702106			1127	1	0.9784543185468765		1127	1	0.905414		1127	1	0.9806655319292009		1127	1	0.9942328519922113
1128	1	0.9999999999999298		1128	1	0.9999999382611321		1128	1	0.9999984822045094		1128	1	0.9999990452996937			1128	1	0.9999980571951301		1128	1	0.863708		1128	1	0.9938829484633371		1128	1	0.9918588810417183
1129	1	0.9999999999660254		1129	1	0.9999990702546705		1129	1	0.9999655271649086		1129	1	0.9999829860962953			1129	1	0.84974		1129	1	0.161737		1129	1	0.40737315145356306		1129	1	0.7909024094681163
1130	1	0.9999999990894077		1130	1	0.9999999895302624		1130	1	0.9999999743313146		1130	1	0.9999931945930738			1130	1	0.9997773033696572		1130	1	0.957622		1130	1	0.9779235531163866		1130	1	0.9991650277828545
1131	1	0.9999999986213188		1131	1	0.9999999975428854		1131	1	0.9999999722667161		1131	1	0.9999970448105441			1131	1	0.9868531845458779		1131	1	0.844849		1131	1	0.9541086732621843		1131	1	0.9963878002190912
1132	1	1		1132	1	0.9999617385903025		1132	1	0.9999985001712814		1132	1	0.999999			1132	1	0.9999834607986333		1132	1	0.445607		1132	1	0.9026425721347188		1132	1	0.9963670461304963
1133	1	0.9999999999998841		1133	1	0.9999976377547739		1133	1	0.9999985177103718		1133	1	0.9999986293391258			1133	1	0.9971310721676991		1133	1	0.85073		1133	1	0.9837374413404916		1133	1	0.9991642525760988
1134	1	0.9999999999455176		1134	1	0.9999999999649655		1134	1	0.9999999966624766		1134	1	0.9999972067847085			1134	1	0.9999662653806505		1134	1	0.660554		1134	1	0.8747563120841382		1134	1	0.9882803196581983
1135	1	0.9999999999999515		1135	1	0.9999999998931195		1135	1	0.9999999916350492		1135	1	0.9999980844043806			1135	1	0.9999791983621144		1135	1	0.872931		1135	1	0.9978456905136103		1135	1	0.9982756028754249
1136	1	0.9999999575130566		1136	1	0.9999999954146684		1136	1	0.9999999123041098		1136	1	0.9998941668615148			1136	1	0.9999979419736981		1136	1	0.939423		1136	1	0.9946017200134459		1136	1	0.9960203908533627
1137	1	0.9999999999974961		1137	1	0.9999999954555614		1137	1	1		1137	1	0.999997			1137	1	0.9691399602692494		1137	1	0.869395		1137	1	0.9937830283573692		1137	1	0.9993213779620326
1138	1	0.9999999985319875		1138	1	0.9999999958808319		1138	1	0.9999998832739104		1138	1	0.99999			1138	1	0.9959785907479952		1138	1	0.838253		1138	1	0.9687735423542206		1138	1	0.9970163995801352
1139	1	0.9999999992778708		1139	1	1		1139	1	0.9999999616096267		1139	1	0.9999930179780826			1139	1	0.9999997069768561		1139	1	0.817923		1139	1	0.9972068337655604		1139	1	0.9998100673224212
1140	1	0.9999999999999459		1140	1	0.9999999999318309		1140	1	0.9999999961926298		1140	1	0.9999997901638263			1140	1	0.9999074805690786		1140	1	0.953045		1140	1	0.9973127020166442		1140	1	0.9987345463393849
1141	1	1		1141	1	0.9999999989080839		1141	1	0.9999999968125876		1141	1	0.9999745419678936			1141	1	0.9279995743898561		1141	1	0.9388		1141	1	0.8624179979849831		1141	1	0.99607
1142	1	0.9999999999999993		1142	1	1		1142	1	0.9999617443123124		1142	1	0.9997423285490306			1142	1	0.8572848389518823		1142	1	0.660586		1142	1	0.8382860968521609		1142	1	0.9769759848255993
1143	1	1		1143	1	1		1143	1	0.9999999948729433		1143	1	0.9999998342347576			1143	1	0.9951244060663677		1143	1	0.586596		1143	1	0.7408490597646349		1143	1	0.9551880534154513
1144	1	1		1144	1	0.9999999524860433		1144	1	0.9999997793337153		1144	1	0.9999906496138735			1144	1	0.96675		1144	1	0.877577		1144	1	0.9444220004011946		1144	1	0.9983079872468166
1145	1	1		1145	1	0.9999999996558029		1145	1	0.9999999989897788		1145	1	0.9999198714193335			1145	1	0.9790848045202604		1145	1	0.713323		1145	1	0.920986		1145	1	0.990089
1146	1	1		1146	1	0.9999999768747095		1146	1	0.9999999901675592		1146	1	0.9999851797520684			1146	1	0.9993581703224179		1146	1	0.775571		1146	1	0.8674052300355992		1146	1	0.9875439179647842
1147	1	1		1147	1	0.9999999971224065		1147	1	0.9999999994433079		1147	1	0.9999997478425057			1147	1	0.9927303947473465		1147	1	0.957677		1147	1	0.909587		1147	1	0.9946782133956235
1148	1	1		1148	1	0.9999999987581374		1148	1	0.9999999990623959		1148	1	0.9999985230596352			1148	1	0.9867267553012135		1148	1	0.889017		1148	1	0.9182645427003919		1148	1	0.9880123402769182
1149	1	1		1149	1	0.9999999996275689		1149	1	1		1149	1	0.9999822850896385			1149	1	0.424333		1149	1	0.620086		1149	1	0.9735869163114267		1149	1	0.9978370189869619
1150	1	1		1150	1	0.9999999736867565		1150	1	0.9999999905375507		1150	1	0.9999996261452032			1150	1	0.7552966125381059		1150	1	0.576144		1150	1	0.7196546386295365		1150	1	0.9786982853514483
1151	1	1		1151	1	0.9999999946246598		1151	1	0.9999999913150885		1151	1	0.9999870080739457			1151	1	0.9998979761734735		1151	1	0.95625		1151	1	0.9553283463435114		1151	1	0.9915934700413898
1152	1	0.9999999999999986		1152	1	0.9999999884781718		1152	1	0.9999993104864634		1152	1	0.9999924142338558			1152	1	0.35944775236264165		1152	1	0.80054		1152	1	0.7222003629037519		1152	1	0.6164126422191663
1153	1	1		1153	1	0.9999999971614688		1153	1	0.9999999995115018		1153	1	0.9999979024382054			1153	1	0.9817722795714768		1153	1	0.943188		1153	1	0.9884797337148712		1153	1	0.9973193261109171
1154	1	1		1154	1	0.9999999948023949		1154	1	0.9999999988497236		1154	1	0.9999946537257071			1154	1	0.9975665480954684		1154	1	0.938771		1154	1	0.9257941578158337		1154	1	0.990887
1155	1	1		1155	1	0.9999999529180753		1155	1	0.9999999989122702		1155	1	0.9999982294228614			1155	1	0.9821419586465483		1155	1	0.713373		1155	1	0.9020496868258993		1155	1	0.9951246492001845
1156	1	1		1156	1	0.9999999933954477		1156	1	0.9999999973484288		1156	1	0.9999997410148151			1156	1	0.9969135030042243		1156	1	0.874358		1156	1	0.9363899374477537		1156	1	0.9941624968390511
1157	1	0.9999999999999997		1157	1	0.9999999993182769		1157	1	0.9999999673979233		1157	1	0.9999937042337652			1157	1	0.3845034152937982		1157	1	0.955485		1157	1	0.9157682608841319		1157	1	0.9947287948134002
1158	1	1		1158	1	0.9999999999999905		1158	1	0.9999999999563409		1158	1	0.9999999983058232			1158	1	0.9968589775062721		1158	1	0.978698		1158	1	0.9965379510312752		1158	1	0.9975214873053077
1159	1	1		1159	1	0.9999881022401035		1159	1	0.9999980394149292		1159	1	0.9999836330193382			1159	1	0.9938007621439175		1159	1	0.311693		1159	1	0.38251609916258045		1159	1	0.5518882665276013
1160	1	1		1160	1	0.9999999999558914		1160	1	0.9999999986393956		1160	1	0.9999999788198266			1160	1	0.9185857109511076		1160	1	0.982194		1160	1	0.8853259520293961		1160	1	0.9893069326879679
1161	1	1		1161	1	0.9999999999999942		1161	1	0.9999999999995148		1161	1	0.9999999993761797			1161	1	0.9955117517942049		1161	1	0.463358		1161	1	0.9528854237531905		1161	1	0.9880215753630709
1162	1	1		1162	1	0.9999999999997174		1162	1	0.9999999999900113		1162	1	0.9999999992608106			1162	1	0.9998882905924158		1162	1	0.988942		1162	1	0.9958717995742911		1162	1	0.9970883678162424
1163	1	1		1163	1	1		1163	1	0.9999999999658302		1163	1	1			1163	1	0.999965		1163	1	0.995381		1163	1	0.9993970296787337		1163	1	0.998667
1164	1	1		1164	1	0.9999999999999992		1164	1	0.9999999999896696		1164	1	0.9999999991743838			1164	1	0.9998964200197401		1164	1	0.995439		1164	1	0.9946983758641862		1164	1	0.9985531116239549
1165	1	1		1165	1	0.9999999999995982		1165	1	0.9999999999908995		1165	1	0.9999968111897883			1165	1	0.9999893290526439		1165	1	0.821896		1165	1	0.9965984476501765		1165	1	0.9950789688796409
1166	1	1		1166	1	0.9999999999999603		1166	1	0.9999999999959895		1166	1	1			1166	1	0.9999120693565609		1166	1	0.991106		1166	1	0.9948708785985699		1166	1	0.9969033010238798
1167	1	1		1167	1	0.9999999992804112		1167	1	0.9999999999314723		1167	1	0.9999994944980181			1167	1	0.9999382125007792		1167	1	0.996158		1167	1	0.9941935975781904		1167	1	0.9969294917196687
1168	1	1		1168	1	0.9999999999899264		1168	1	0.9999999999848247		1168	1	0.9999999844253499			1168	1	0.9997891210860419		1168	1	0.9935		1168	1	0.9984934735405743		1168	1	0.9963968868815848
1169	1	1		1169	1	0.9999999999999908		1169	1	0.9999999999999731		1169	1	0.9999999997806169			1169	1	0.9999992630759615		1169	1	0.969782		1169	1	0.999864		1169	1	0.9994568366673351
1170	1	1		1170	1	0.9999999999992971		1170	1	0.9999999999773109		1170	1	0.9999999981921164			1170	1	0.9992171860007908		1170	1	0.960679		1170	1	0.9938114544183021		1170	1	0.9977787426730909
1171	1	1		1171	1	0.9999999998016925		1171	1	0.9999999975474247		1171	1	0.9999999997919324			1171	1	0.9998318607558676		1171	1	0.361812		1171	1	0.5106184833524636		1171	1	0.741731
1172	1	1		1172	1	0.9999999999997995		1172	1	0.9999999999798226		1172	1	0.9999999525526339			1172	1	0.9999830080021439		1172	1	0.997365		1172	1	0.9940374981917947		1172	1	0.9975762882304846
1173	1	1		1173	1	1		1173	1	1		1173	1	0.9999999997628062			1173	1	0.9999914369655236		1173	1	0.909016		1173	1	0.9990404803716781		1173	1	0.998465
1174	1	1		1174	1	0.9999999999945461		1174	1	0.9999999991105907		1174	1	0.9999988955096164			1174	1	0.99942		1174	1	0.318631		1174	1	0.6038964606828142		1174	1	0.922953
1175	1	1		1175	1	0.9999999999103212		1175	1	0.9999999951807563		1175	1	0.9999991839737009			1175	1	0.9995631404657342		1175	1	0.702083		1175	1	0.9226920102760303		1175	1	0.9930465181342628
1176	1	1		1176	1	0.9999999999997169		1176	1	0.9999999999740159		1176	1	0.9999992304492467			1176	1	0.9996925411871626		1176	1	0.99356		1176	1	0.9995058059623595		1176	1	0.9985004871558165
1177	1	1		1177	1	0.9999999999999994		1177	1	0.9999999999999982		1177	1	0.9999999996962702			1177	1	0.9999943183891136		1177	1	0.990466		1177	1	0.9994406372153373		1177	1	0.998574
1178	1	1		1178	1	0.9999999999999968		1178	1	1		1178	1	0.9999999404334148			1178	1	0.999999		1178	1	0.994004		1178	1	0.9995714642414302		1178	1	0.9967485384707794
1179	1	1		1179	1	0.9999999999999215		1179	1	0.9999999991009823		1179	1	0.9999999993329123			1179	1	0.9999282199641429		1179	1	0.422138		1179	1	0.30585561765796415		1179	1	0.5112801587578187
1180	1	1		1180	1	0.9999999999999983		1180	1	0.9999999999984102		1180	1	0.9999999963076923			1180	1	0.9999914843012006		1180	1	0.814788		1180	1	0.9994875549742965		1180	1	0.9987065180808548
1181	1	1		1181	1	1		1181	1	0.9999999999959309		1181	1	0.9999999997961528			1181	1	0.9999906786135423		1181	1	0.846927		1181	1	0.9994277458362342		1181	1	0.9987845476066697
1182	1	1		1182	1	1		1182	1	0.9999999999919535		1182	1	0.9999999886607535			1182	1	0.9996451523425312		1182	1	0.988012		1182	1	0.9978869320622583		1182	1	0.996353
1183	1	1		1183	1	0.9999999999280993		1183	1	1		1183	1	0.9999993326627562			1183	1	0.9996016647000766		1183	1	0.624354		1183	1	0.8456803401418513		1183	1	0.987378
1184	1	1		1184	1	1		1184	1	0.9999999999994053		1184	1	0.9999999966654456			1184	1	0.998957		1184	1	0.987986		1184	1	0.9990990384131124		1184	1	0.9984317563010072
1185	1	1		1185	1	0.9999999999520933		1185	1	0.9999999769571322		1185	1	0.999999			1185	1	0.9999457686326708		1185	1	0.886191		1185	1	0.9738527955246626		1185	1	0.9947909502775343
1186	1	1		1186	1	0.9999999999994101		1186	1	1		1186	1	0.9999999983363552			1186	1	0.9999977572568717		1186	1	0.595743		1186	1	0.9745232852714916		1186	1	0.9837108393919585
1187	1	1		1187	1	0.9999999999999112		1187	1	0.9999999998097511		1187	1	1			1187	1	0.9987872185443457		1187	1	0.940896		1187	1	0.9984726742062872		1187	1	0.9981779502134087
1188	1	1		1188	1	0.9999855907075832		1188	1	0.9999796324624171		1188	1	0.9998902140919975			1188	1	0.9783601441642977		1188	1	0.218111		1188	1	0.5715777333327399		1188	1	0.9348667010487661
1189	1	1		1189	1	0.9999999999916661		1189	1	0.9999999999823589		1189	1	1			1189	1	0.9999945140684106		1189	1	0.992381		1189	1	0.9989112363234326		1189	1	0.9979346158696936
1190	1	1		1190	1	0.9999999999999994		1190	1	0.9999999999988494		1190	1	0.9999999997282434			1190	1	0.9999842251339311		1190	1	0.787038		1190	1	0.9967393341334255		1190	1	0.9981196466405503
1191	1	1		1191	1	0.9999999999999123		1191	1	0.9999999999999445		1191	1	0.9999999999902949			1191	1	0.9998239041574399		1191	1	0.992159		1191	1	0.9984696620973031		1191	1	0.998762
1192	1	1		1192	1	0.9999999999999923		1192	1	0.9999999999880617		1192	1	0.9999999761406754			1192	1	0.9993863242430664		1192	1	0.592771		1192	1	0.8416598960794609		1192	1	0.9821618611700977
1193	1	1		1193	1	0.9999999999981501		1193	1	0.9999999999989191		1193	1	0.9999999977755962			1193	1	0.9999928222614263		1193	1	0.856943		1193	1	0.9944532876273896		1193	1	0.9939896034935278
1194	1	1		1194	1	0.9999999999999964		1194	1	0.9999999999939017		1194	1	0.9999999974526635			1194	1	0.9999329697505449		1194	1	0.997954		1194	1	0.9970673111595788		1194	1	0.9981170705378918
1195	1	1		1195	1	1		1195	1	0.9999999767679011		1195	1	1			1195	1	0.9999993960662342		1195	1	0.26461		1195	1	0.27348497956961576		1195	1	0.6533367700718599
1196	1	1		1196	1	0.9999999999999962		1196	1	1		1196	1	0.9999999939446732			1196	1	0.9985007224446242		1196	1	0.947381		1196	1	0.9831571480269569		1196	1	0.9953967161809465
1197	1	1		1197	1	0.9999999999995085		1197	1	0.9999999939783928		1197	1	0.9999999975479191			1197	1	0.9999423043090109		1197	1	0.544093		1197	1	0.8220225385375871		1197	1	0.979657
1198	1	1		1198	1	0.9999999999999938		1198	1	0.9999999999999891		1198	1	0.9999999995825899			1198	1	0.999973		1198	1	0.995791		1198	1	0.9977622483822477		1198	1	0.9978940907743501
1199	1	1		1199	1	0.9999999999996649		1199	1	0.9999999999952407		1199	1	0.9999999967332052			1199	1	0.9988026368217117		1199	1	0.984234		1199	1	0.9990158584772414		1199	1	0.9983297426047746
1200	1	1		1200	1	0.9999886630729722		1200	1	0.9992208564148091		1200	1	0.9999426124998432			1200	1	0.9999971004118978		1200	1	0.0827256		1200	1	0.4129243872280057		1200	1	0.7518048700850064
1201	1	1		1201	1	0.9999999986963916		1201	1	0.9999999999663484		1201	1	0.9999999286442044			1201	1	0.999771		1201	1	0.787368		1201	1	0.9654675542708656		1201	1	0.9951569120068449
1202	1	1		1202	1	0.9999999993678899		1202	1	0.9976270991166521		1202	1	0.9999995389437796			1202	1	0.9993916951280607		1202	1	0.141407		1202	1	0.2026927878556445		1202	1	0.2622132242118149
1203	1	1		1203	1	0.9999999979040016		1203	1	0.9998638382341564		1203	1	0.9999911684648646			1203	1	0.9989529918740357		1203	1	0.44564		1203	1	0.5803482557122942		1203	1	0.7509192900391952
1204	1	1		1204	1	0.9999999988941815		1204	1	0.9986321945397696		1204	1	0.9999707131733004			1204	1	0.9931554199329123		1204	1	0.12728		1204	1	0.9537445567305944		1204	1	0.9957304876521745
1205	1	1		1205	1	0.9999999999522157		1205	1	0.9999559596884617		1205	1	0.9999918269694054			1205	1	0.9992571059046585		1205	1	0.172327		1205	1	0.8400971361220446		1205	1	0.9860502622341171
1206	1	0.9999999999992712		1206	1	0.9999999995544613		1206	1	0.9999920658491342		1206	1	0.9999900775926678			1206	1	0.9999408610953159		1206	1	0.44133		1206	1	0.7664170290627766		1206	1	0.9565335235682794
1207	1	1		1207	1	0.9999989851733049		1207	1	0.9999955860749403		1207	1	0.999999			1207	1	0.9996281194805279		1207	1	0.962672		1207	1	0.9853996631375683		1207	1	0.993345
1208	1	1		1208	1	0.9999999778697515		1208	1	0.9999886554920656		1208	1	0.9999865953829696			1208	1	0.9966735155794778		1208	1	0.646177		1208	1	0.42233327920162267		1208	1	0.870646
1209	1	1		1209	1	0.9999988869980091		1209	1	0.9999382341976044		1209	1	0.9995573326197232			1209	1	0.9926915176717291		1209	1	0.300697		1209	1	0.22892466256956923		1209	1	0.2317047085977991
1210	1	1		1210	1	0.9999753449799853		1210	1	0.9999837977664756		1210	1	0.9999980274043161			1210	1	0.999436		1210	1	0.966141		1210	1	0.9922192831443526		1210	1	0.9957339390669813
1211	1	1		1211	1	0.999993		1211	1	0.9916476192456732		1211	1	0.9990166959591619			1211	1	0.9158889523082986		1211	1	0.169456		1211	1	0.22441340143665334		1211	1	0.0871844
1212	1	1		1212	1	0.9999996712185643		1212	1	0.9999980301630377		1212	1	0.9999996045748056			1212	1	0.999619		1212	1	0.982423		1212	1	0.9802901286428534		1212	1	0.9912655094243199
1213	1	1		1213	1	0.9999833757517238		1213	1	0.9999961477647898		1213	1	0.9999988534201808			1213	1	0.9994900272361564		1213	1	0.381329		1213	1	0.797509		1213	1	0.9910751482934469
1214	1	0.9999999999999961		1214	1	0.9999903213017459		1214	1	0.9999708869774434		1214	1	0.9999750191338671			1214	1	0.9986260462920954		1214	1	0.510421		1214	1	0.3003069414048385		1214	1	0.7301904082328597
1215	1	0.9999999999999993		1215	1	0.9999995749676448		1215	1	0.9999963918087168		1215	1	0.999932			1215	1	0.9995139992432741		1215	1	0.44471		1215	1	0.8116090208441473		1215	1	0.9893013935897406
1216	1	1		1216	1	0.9999868790767866		1216	1	0.9999950322798945		1216	1	0.9999973966428354			1216	1	0.9997503402146426		1216	1	0.583504		1216	1	0.9325797642381342		1216	1	0.9964286564815265
1217	1	1		1217	1	0.999971		1217	1	0.9999100370365559		1217	1	0.9999779430841087			1217	1	0.999158		1217	1	0.84267		1217	1	0.9836413442960056		1217	1	0.9959812949271365
1218	1	1		1218	1	0.9999999997632047		1218	1	1		1218	1	0.9999999789902737			1218	1	0.9999994643413269		1218	1	0.530366		1218	1	0.8661486574205622		1218	1	0.9586863625231947
1219	1	1		1219	1	0.9999999998527687		1219	1	0.9999999586260861		1219	1	1			1219	1	0.9922948460461455		1219	1	0.293381		1219	1	0.6234236679519951		1219	1	0.9738825251107002
1220	1	1		1220	1	0.9999999999999861		1220	1	0.9999999998265965		1220	1	0.9999993486885423			1220	1	0.9999831828071337		1220	1	0.412279		1220	1	0.7808036961680561		1220	1	0.9792252277410003
1221	1	1		1221	1	0.9999999999999994		1221	1	0.9999999953203736		1221	1	0.9999999728068241			1221	1	0.9999232684671003		1221	1	0.910902		1221	1	0.9817123613369431		1221	1	0.9982840088808973
1222	1	1		1222	1	0.9999999999567893		1222	1	0.9999999983675676		1222	1	1			1222	1	0.9999827838415181		1222	1	0.889875		1222	1	0.9873884224769288		1222	1	0.9987618983262692
1223	1	1		1223	1	0.9999999999999992		1223	1	0.9999999999907097		1223	1	0.9999999845243925			1223	1	0.9999836721695576		1223	1	0.864298		1223	1	0.9949177235213206		1223	1	0.9991429971548548
1224	1	1		1224	1	0.9999999997393432		1224	1	0.9999999936063364		1224	1	0.9999999543141499			1224	1	0.9969863356305525		1224	1	0.4631		1224	1	0.9560126514737972		1224	1	0.998531
1225	1	1		1225	1	0.9999999999997695		1225	1	0.9999999795574207		1225	1	0.9999938717999196			1225	1	0.9999997852600303		1225	1	0.340506		1225	1	0.30084495496382807		1225	1	0.37778606557352135
1226	1	1		1226	1	0.9999999999999987		1226	1	0.9999999919439106		1226	1	1			1226	1	0.9982099035229086		1226	1	0.627064		1226	1	0.3588014923392228		1226	1	0.8631614725331751
1227	1	1		1227	1	0.9999999999996548		1227	1	0.9999999999938302		1227	1	0.9999999971656827			1227	1	0.9999997399705564		1227	1	0.986194		1227	1	0.9908986227890987		1227	1	0.9964671002246882
1228	1	1		1228	1	0.9999999999997646		1228	1	0.9999999999939211		1228	1	0.9999999993016693			1228	1	0.9999818010926553		1228	1	0.942575		1228	1	0.9977119227291191		1228	1	0.9989356805035822
1229	1	0.9999999999999679		1229	1	0.9999999997961372		1229	1	0.9999999997515642		1229	1	0.9998616258541275			1229	1	0.9999801097937155		1229	1	0.644634		1229	1	0.9886567329854197		1229	1	0.9992628166776351
1230	1	0.9999999999999986		1230	1	0.9999999999996311		1230	1	0.9999998445146634		1230	1	0.999999			1230	1	0.9984708906327647		1230	1	0.852009		1230	1	0.9975940293822786		1230	1	0.9966876567746787
1231	1	1		1231	1	0.9999999999999994		1231	1	0.9999999999891815		1231	1	0.9999999581805455			1231	1	0.9982398561333199		1231	1	0.964858		1231	1	0.9921045516448925		1231	1	0.9986970148232182
1232	1	1		1232	1	0.9999999999999994		1232	1	0.9999999998876924		1232	1	0.9999999902442499			1232	1	0.9995240152855013		1232	1	0.832621		1232	1	0.9950201574995945		1232	1	0.9987483479150052
1233	1	1		1233	1	0.9999999999999998		1233	1	0.9999999999472116		1233	1	0.9999999981762038			1233	1	0.9999995274931491		1233	1	0.821869		1233	1	0.9934056562815341		1233	1	0.9965794363295982
1234	1	1		1234	1	0.9999999995840826		1234	1	0.9999999984058302		1234	1	0.9999991370095332			1234	1	0.9999989468769945		1234	1	0.144121		1234	1	0.5830792142508844		1234	1	0.7748964012664192
1235	1	1		1235	1	0.9999999986036265		1235	1	0.9999999998345857		1235	1	0.9999999703976926			1235	1	0.9999346522356075		1235	1	0.250182		1235	1	0.8229784951853902		1235	1	0.9913147780012754
1236	1	1		1236	1	0.9999999999999651		1236	1	0.999993		1236	1	0.9999994891231193			1236	1	0.9994451667582838		1236	1	0.801091		1236	1	0.9905431543460705		1236	1	0.9966278883183185
1237	1	1		1237	1	0.9999999999992879		1237	1	0.9999999661263039		1237	1	1			1237	1	0.9986749559413567		1237	1	0.900008		1237	1	0.9815813000365867		1237	1	0.9973177979921342
1238	1	1		1238	1	0.9999999999684194		1238	1	0.9999999234716361		1238	1	0.9999999730201383			1238	1	0.9933063999391839		1238	1	0.86977		1238	1	0.9788292335546235		1238	1	0.9988423587392479
1239	1	1		1239	1	0.9999999999996949		1239	1	0.9999999999725966		1239	1	0.9999999995678541			1239	1	0.9984212403161833		1239	1	0.94008		1239	1	0.9811323168442112		1239	1	0.9960719116417714
1240	1	1		1240	1	0.9999999999766004		1240	1	0.9999971355022257		1240	1	0.9999999469832557			1240	1	0.8189909494008234		1240	1	0.796905		1240	1	0.9702190849889796		1240	1	0.9960309165517195
1241	1	1		1241	1	0.9999752717077979		1241	1	0.9999998813040085		1241	1	0.9999938774861907			1241	1	0.9698096686343615		1241	1	0.256719		1241	1	0.9436483109208713		1241	1	0.999233
1242	1	1		1242	1	0.9999999999999968		1242	1	0.9999999984791501		1242	1	0.9999999707522735			1242	1	0.9983180852536458		1242	1	0.844929		1242	1	0.9990315711126947		1242	1	0.9993365470789518
1243	1	1		1243	1	0.9999999999992593		1243	1	0.9999999685414899		1243	1	0.9999999935715113			1243	1	0.9985961433177089		1243	1	0.891648		1243	1	0.9797203331718458		1243	1	0.9972573257533546
1244	1	0.9999999999992532		1244	1	0.9414635990050104		1244	1	0.9588220658402605		1244	1	0.9990715138733753			1244	1	0.8964632306486737		1244	1	0.129681		1244	1	0.27930096763234413		1244	1	0.7537412897037934
1245	1	1		1245	1	0.9999999999999905		1245	1	0.9999999999984247		1245	1	0.9999999968451524			1245	1	0.9998412671769702		1245	1	0.925109		1245	1	0.9933532225408237		1245	1	0.9991536018279223
1246	1	1		1246	1	0.9999999999598848		1246	1	0.9999996362357222		1246	1	0.9999986880632231			1246	1	0.9988301448556391		1246	1	0.271267		1246	1	0.5705969132275684		1246	1	0.9588613247194988
1247	1	1		1247	1	0.9999504128345538		1247	1	0.999606		1247	1	0.9999754915840868			1247	1	0.9999999089893098		1247	1	0.327315		1247	1	0.6016681842925786		1247	1	0.3592681528634691
1248	1	1		1248	1	0.9999995369315281		1248	1	0.9999998898446314		1248	1	0.9999994601023546			1248	1	0.9895944928150634		1248	1	0.791305		1248	1	0.9674285136556223		1248	1	0.9979042943969013
1249	1	1		1249	1	0.9999999999995415		1249	1	0.9999999999990775		1249	1	0.9999999913263132			1249	1	0.9994746574399991		1249	1	0.425944		1249	1	0.9735383558581233		1249	1	0.99825
1250	1	1		1250	1	0.9999999999997096		1250	1	0.9999999999999104		1250	1	0.9999999997570739			1250	1	0.974619		1250	1	0.921986		1250	1	0.9986963468242566		1250	1	0.9990796901246083
1251	1	1		1251	1	0.9999591439201831		1251	1	0.9999995827581313		1251	1	0.9999997572714202			1251	1	0.9999533754675968		1251	1	0.61194		1251	1	0.9244448605571394		1251	1	0.9890406109100779
1252	1	1		1252	1	0.9999999999997845		1252	1	0.9999999992312136		1252	1	0.9999999759381153			1252	1	0.9896002811453377		1252	1	0.937122		1252	1	0.9972465168070205		1252	1	0.9963842320549346
1253	1	1		1253	1	0.9999999999352225		1253	1	0.9999984210359838		1253	1	0.9999967075185758			1253	1	0.997908		1253	1	0.151817		1253	1	0.1797970803436525		1253	1	0.42558227749014743
1254	1	1		1254	1	0.9999999998093526		1254	1	0.9999931651335624		1254	1	0.9993193135951877			1254	1	0.9970822060385321		1254	1	0.713758		1254	1	0.9768425799286216		1254	1	0.9991497468501115
1255	1	1		1255	1	0.9999999999455625		1255	1	0.9999999998048041		1255	1	0.9999999812869955			1255	1	0.998609		1255	1	0.601132		1255	1	0.9756103080544066		1255	1	0.9986491547253037
1256	1	1		1256	1	0.9999999999999957		1256	1	0.9999999929985128		1256	1	0.9999998815758114			1256	1	0.9991362550350175		1256	1	0.875396		1256	1	0.9991046657227023		1256	1	0.9991776811052169
1257	1	1		1257	1	0.9999999999898048		1257	1	0.9999999297595572		1257	1	0.9999999640578822			1257	1	0.9968354876839196		1257	1	0.85531		1257	1	0.9787994540801782		1257	1	0.9989548036195484
1258	1	1		1258	1	0.9999999999999725		1258	1	0.9999999999996425		1258	1	1			1258	1	0.9986863055142339		1258	1	0.77446		1258	1	0.9936635906737189		1258	1	0.9980780725743865
1259	1	1		1259	1	0.9999999999999957		1259	1	0.9999999999999741		1259	1	0.9999999999461738			1259	1	0.996989		1259	1	0.977553		1259	1	0.9983378253787685		1259	1	0.9992947533457939
1260	1	1		1260	1	1		1260	1	0.9999999999999338		1260	1	0.9999999990858778			1260	1	0.9988913325928251		1260	1	0.94291		1260	1	0.9694286570408077		1260	1	0.9989265927530906
1261	1	1		1261	1	0.9999999994835629		1261	1	0.9999999999707951		1261	1	1			1261	1	0.9970381237451471		1261	1	0.140196		1261	1	0.21592589856667516		1261	1	0.4368726718999053
1262	1	1		1262	1	0.9999999998048121		1262	1	0.9999999999999858		1262	1	0.9999999998573567			1262	1	0.9958877220370387		1262	1	0.966806		1262	1	0.9731585661484743		1262	1	0.9952826320655952
1263	1	0.9999999999999508		1263	1	0.9999989707374498		1263	1	0.9999999438513163		1263	1	0.9999998487571765			1263	1	0.9999999999156799		1263	1	0.953991		1263	1	0.9992333604299739		1263	1	0.9979975555263605
1264	1	1		1264	1	0.9999999306106984		1264	1	0.9999999999650195		1264	1	0.9999999890439658			1264	1	0.9949002753397934		1264	1	0.563564		1264	1	0.9354163293001438		1264	1	0.99876
1265	1	1		1265	1	0.9999999999939359		1265	1	0.9999999977298465		1265	1	0.9999999335658848			1265	1	0.9966563910285289		1265	1	0.992558		1265	1	0.8021710704953471		1265	1	0.9809863356093461
1266	1	1		1266	1	0.9999999998127662		1266	1	0.9999999999996406		1266	1	0.9999999989014029			1266	1	0.9988533402638208		1266	1	0.86232		1266	1	0.9894034982718338		1266	1	0.9974615453401781
1267	1	1		1267	1	0.9999999999983823		1267	1	0.9999999999989728		1267	1	0.9999999819944141			1267	1	0.9999884674955075		1267	1	0.940104		1267	1	0.9973618459280863		1267	1	0.998661
1268	1	1		1268	1	0.9999999994439258		1268	1	0.9999999994129354		1268	1	0.9999999067847709			1268	1	0.9999877557966397		1268	1	0.731325		1268	1	0.6922331823918527		1268	1	0.9912261360279094
1269	1	1		1269	1	0.9999999999915596		1269	1	0.9999999999992522		1269	1	1			1269	1	0.999896		1269	1	0.796752		1269	1	0.8942954150848047		1269	1	0.9976168263346901
1270	1	1		1270	1	1		1270	1	0.9999999999755055		1270	1	0.9999999791976861			1270	1	0.9997421883078864		1270	1	0.917337		1270	1	0.9984021161440454		1270	1	0.9983043398020442
1271	1	1		1271	1	0.9999999999607212		1271	1	0.9999999999420078		1271	1	0.9999999962694563			1271	1	0.9999258840620336		1271	1	0.879866		1271	1	0.9980810150763089		1271	1	0.9994610330717778
1272	1	1		1272	1	0.9999999854125169		1272	1	0.9999999999997545		1272	1	0.9999999957438408			1272	1	0.9985169999894323		1272	1	0.984174		1272	1	0.9008256010701958		1272	1	0.9982592014482955
1273	1	1		1273	1	0.9999999999321809		1273	1	0.9999999692929284		1273	1	0.9999986119786878			1273	1	0.9982023625429199		1273	1	0.935663		1273	1	0.8213524009119104		1273	1	0.9913120003432555
1274	1	1		1274	1	0.9999999999963469		1274	1	0.9999999999582164		1274	1	0.9999999115373099			1274	1	0.999994		1274	1	0.872655		1274	1	0.9910131642876401		1274	1	0.9986597073993264
1275	1	1		1275	1	1		1275	1	0.9999999999631453		1275	1	1			1275	1	0.9952966623485574		1275	1	0.86424		1275	1	0.8967246472176588		1275	1	0.9920184092562919
1276	1	1		1276	1	0.9999999447822842		1276	1	0.9999999996343328		1276	1	0.9999998855314275			1276	1	0.9999999999574466		1276	1	0.89562		1276	1	0.9998109408158989		1276	1	0.9996333770501802
1277	1	1		1277	1	0.9999999993833993		1277	1	0.9999999999976915		1277	1	0.9999999487151007			1277	1	0.9999102203261622		1277	1	0.825818		1277	1	0.9743906792178915		1277	1	0.9991237973356512
1278	1	1		1278	1	0.9999999994432521		1278	1	0.9999999981011661		1278	1	0.9999995448614125			1278	1	0.9999562645835113		1278	1	0.957753		1278	1	0.6293893222377112		1278	1	0.9720935835286263
1279	1	1		1279	1	0.9999999026118008		1279	1	0.9999999765847167		1279	1	0.9999999920684247			1279	1	0.9985506606636763		1279	1	0.931931		1279	1	0.9986887848029294		1279	1	0.9993953858387443
1280	1	1		1280	1	0.9999999991887073		1280	1	0.9999999999976956		1280	1	0.9999999536916686			1280	1	0.9999802740234108		1280	1	0.826515		1280	1	0.9996204956711299		1280	1	0.9982201973362063
1281	1	1		1281	1	1		1281	1	0.9999998038605228		1281	1	0.9999982160995966			1281	1	0.9999776687392606		1281	1	0.754539		1281	1	0.9523250821613163		1281	1	0.9958854216347235
1282	1	1		1282	1	0.9999999999973481		1282	1	0.9999999999996336		1282	1	1			1282	1	0.9999993673548833		1282	1	0.925223		1282	1	0.986342		1282	1	0.9971470987348122
1283	1	1		1283	1	0.9999996237544744		1283	1	0.9999999997963093		1283	1	0.9999999796190062			1283	1	0.9985097741511233		1283	1	0.654751		1283	1	0.918112		1283	1	0.9952659358040559
1284	1	1		1284	1	0.9999999932819834		1284	1	0.9999999999999926		1284	1	0.9999999999022077			1284	1	0.9988277599628886		1284	1	0.978727		1284	1	0.9990670407503849		1284	1	0.999427
1285	1	1		1285	1	0.9999999999824121		1285	1	0.9999999999999077		1285	1	1			1285	1	0.9999897653153657		1285	1	0.922268		1285	1	0.9977116698256667		1285	1	0.9989664244355184
1286	1	1		1286	1	0.9999999994510451		1286	1	0.9999999999517086		1286	1	0.9999997368897575			1286	1	0.8364554885993679		1286	1	0.42296		1286	1	0.7126723075589708		1286	1	0.9783684157270292
1287	1	1		1287	1	0.9999999812457638		1287	1	0.9999999999434032		1287	1	0.9999999869781325			1287	1	0.9924760973954099		1287	1	0.91415		1287	1	0.9704000904642768		1287	1	0.9990552011660337
1288	1	1		1288	1	0.9999999538944196		1288	1	0.9999999998143968		1288	1	0.9999999153396221			1288	1	0.9999772834971701		1288	1	0.593562		1288	1	0.9736742797528728		1288	1	0.9967070104457992
1289	1	1		1289	1	0.9999999999942865		1289	1	0.9999999999999768		1289	1	0.9999999996232426			1289	1	0.9984657209928446		1289	1	0.947519		1289	1	0.999342		1289	1	0.9988550781212657
1290	1	1		1290	1	0.9999999996056236		1290	1	0.9999999998925558		1290	1	0.9999999772949454			1290	1	0.9999162753624251		1290	1	0.675855		1290	1	0.41945297354137684		1290	1	0.509921
1291	1	1		1291	1	0.9999999977480419		1291	1	0.9999999987052568		1291	1	0.9999992340136088			1291	1	0.9999489005449667		1291	1	0.844259		1291	1	0.8367081859097513		1291	1	0.987865
1292	1	1		1292	1	0.9999999999400421		1292	1	0.9999999999990914		1292	1	0.9999999998025864			1292	1	0.9415246761704542		1292	1	0.90578		1292	1	0.9960514236874131		1292	1	0.9982220281279894
1293	1	1		1293	1	0.9999999999999981		1293	1	0.9999999999999796		1293	1	0.9999999995985963			1293	1	0.9972058808056448		1293	1	0.976681		1293	1	0.9997649980511107		1293	1	0.999564
1294	1	1		1294	1	0.9999999998435752		1294	1	0.9999999999983449		1294	1	0.9999999997597674			1294	1	0.9999484497281352		1294	1	0.913095		1294	1	0.8536404818293432		1294	1	0.9950024571524125
1295	1	1		1295	1	0.9999999735113814		1295	1	0.9999999853727599		1295	1	0.9999999987563206			1295	1	0.9987320612604608		1295	1	0.764959		1295	1	0.9569806856338784		1295	1	0.9981422798838706
1296	1	0.9999999999999847		1296	1	0.9999987774909163		1296	1	0.9999999825516885		1296	1	0.9999989801240017			1296	1	0.9999119299598157		1296	1	0.952137		1296	1	0.866409		1296	1	0.9899574685127976
1297	1	0.9999999997324615		1297	1	0.9999987187193059		1297	1	0.9999999508260017		1297	1	0.9999979791776672			1297	1	0.9999999994579079		1297	1	0.6116		1297	1	0.9991018617899236		1297	1	0.9987181568859602
1298	1	1		1298	1	0.9999999999939443		1298	1	1		1298	1	0.9999999995146158			1298	1	0.9997978260494063		1298	1	0.990455		1298	1	0.9973428625892079		1298	1	0.9996136522219851
1299	1	1		1299	1	0.9999999901606004		1299	1	0.9999999999997269		1299	1	0.9999999966231602			1299	1	0.9994316321377551		1299	1	0.876237		1299	1	0.996933		1299	1	0.9945488935135013
1300	1	1		1300	1	0.999935		1300	1	0.9999999408412507		1300	1	0.9999703856561597			1300	1	0.8895025433105915		1300	1	0.205974		1300	1	0.5538888412634684		1300	1	0.533339
1301	1	1		1301	1	0.9994772296829353		1301	1	1		1301	1	0.9998204181603705			1301	1	0.976625		1301	1	0.16735		1301	1	0.2301754772875118		1301	1	0.4207047326077069
1302	1	1		1302	1	0.9999999999814538		1302	1	0.9999999999999971		1302	1	1			1302	1	0.9999979146254291		1302	1	0.977217		1302	1	0.9988102772326357		1302	1	0.9998228051387207
1303	1	1		1303	1	0.9999999999939198		1303	1	1		1303	1	0.9999999651576055			1303	1	0.9999984319349806		1303	1	0.960677		1303	1	0.9958713400129374		1303	1	0.999834
1304	1	1		1304	1	0.9999999996401934		1304	1	0.9999999999999883		1304	1	0.9999999990479603			1304	1	0.9999671498095009		1304	1	0.978748		1304	1	0.9941411960084315		1304	1	0.9992832690802246
1305	1	1		1305	1	0.9999999994076348		1305	1	0.9999999999961932		1305	1	0.9999999999905004			1305	1	0.9999602973845757		1305	1	0.932558		1305	1	0.9988020014231443		1305	1	0.999829
1306	1	1		1306	1	0.9999999999859341		1306	1	1		1306	1	0.9999999718065773			1306	1	0.9999962080845253		1306	1	0.96608		1306	1	0.9913784877084006		1306	1	0.9997367317978857
1307	1	1		1307	1	1		1307	1	1		1307	1	0.9999999999702603			1307	1	0.9999920131797727		1307	1	0.992353		1307	1	0.998453		1307	1	0.9996934704057658
1308	1	0.9999999999995367		1308	1	0.3915936979011253		1308	1	0.46546901785483225		1308	1	0.6083266452118422			1308	1	0.9947581311713936		1308	1	0.199995		1308	1	0.1884478077466014		1308	1	0.1440943063731718
1309	1	1		1309	1	0.9999999978333624		1309	1	0.9999999999993557		1309	1	0.9999999998532821			1309	1	0.9999972602433259		1309	1	0.895574		1309	1	0.968575		1309	1	0.9995963816043031
1310	1	1		1310	1	0.9999999989122277		1310	1	0.9999999999690199		1310	1	0.9999999994652832			1310	1	0.9998054103588846		1310	1	0.903235		1310	1	0.9954731547365572		1310	1	0.9978335183132347
1311	1	1		1311	1	1		1311	1	0.9999999999999073		1311	1	0.9999999968925057			1311	1	0.999981		1311	1	0.948254		1311	1	0.9952876129349081		1311	1	0.9992567097308683
1312	1	1		1312	1	0.9999999986283336		1312	1	0.9999999999412545		1312	1	0.9999999959535719			1312	1	0.9999873731925154		1312	1	0.857195		1312	1	0.9951446374183619		1312	1	0.999461
1313	1	1		1313	1	0.9999999999916215		1313	1	0.9999999999997864		1313	1	0.9999999999989299			1313	1	0.9997556983830712		1313	1	0.703989		1313	1	0.9954952530980852		1313	1	0.9998673832098423
1314	1	1		1314	1	0.9999999769999531		1314	1	0.9999999994444322		1314	1	0.9999930332522273			1314	1	0.7867344586947336		1314	1	0.323692		1314	1	0.6591526649505752		1314	1	0.852905
1315	1	1		1315	1	0.9999999999374382		1315	1	1		1315	1	0.9999999981194994			1315	1	0.9998531059566156		1315	1	0.357117		1315	1	0.8817398304976917		1315	1	0.9933142861293659
1316	1	1		1316	1	0.9999999950350313		1316	1	0.9999999999999926		1316	1	0.9999999823863697			1316	1	0.997601		1316	1	0.533673		1316	1	0.93948		1316	1	0.9988980775327755
1317	1	1		1317	1	0.9999999970978722		1317	1	0.9999999993525567		1317	1	0.9999999889356135			1317	1	0.9999955633706522		1317	1	0.343035		1317	1	0.5685728187394795		1317	1	0.9686411093070219
1318	1	1		1318	1	0.9999999999793017		1318	1	0.9999999999999982		1318	1	0.9999999997653904			1318	1	0.9998804005138653		1318	1	0.977029		1318	1	0.9962397559466396		1318	1	0.9994719719298879
1319	1	1		1319	1	0.9999999999682055		1319	1	0.9999999999999936		1319	1	0.9999999985951594			1319	1	0.9999979093536147		1319	1	0.98173		1319	1	0.9988866945728145		1319	1	0.999736
1320	1	1		1320	1	0.9999999999861521		1320	1	0.9999999998906994		1320	1	0.9999999994944379			1320	1	0.9989569660900746		1320	1	0.950604		1320	1	0.9955638881921882		1320	1	0.9998127884232162
1321	1	1		1321	1	0.9999999999953015		1321	1	0.9999999999621827		1321	1	1			1321	1	0.9852972637161406		1321	1	0.909396		1321	1	0.99776		1321	1	0.9997800231948348
1322	1	0.9999999999999546		1322	1	0.9964179178104033		1322	1	0.9877914958711573		1322	1	0.9950044839654004			1322	1	0.9872270162727702		1322	1	0.104627		1322	1	0.0995658		1322	1	0.13874545374149963
1323	1	1		1323	1	0.9999999999964637		1323	1	0.9999999999999984		1323	1	0.9999999999471229			1323	1	0.9999601146094865		1323	1	0.989939		1323	1	0.9980319412160865		1323	1	0.9996105407701651
1324	1	1		1324	1	0.9999999999856573		1324	1	0.9999999937123711		1324	1	0.9999999997158171			1324	1	0.9996369100839233		1324	1	0.908358		1324	1	0.9934118535776841		1324	1	0.9997283853518322
1325	1	1		1325	1	0.9999999966307094		1325	1	0.9999999999731711		1325	1	0.9999999995555985			1325	1	0.9995920900186726		1325	1	0.868568		1325	1	0.9926060213407348		1325	1	0.995672
1326	1	1		1326	1	1		1326	1	1		1326	1	0.9999999999702603			1326	1	0.9999920131797727		1326	1	0.992353		1326	1	0.998453		1326	1	0.9996934704057658
1327	1	1		1327	1	0.9999999998515819		1327	1	0.9999999686115206		1327	1	0.9999999180753354			1327	1	0.9999881150806912		1327	1	0.775416		1327	1	0.9875310369694212		1327	1	0.9990232407664055
1328	1	1		1328	1	0.9999999372622005		1328	1	0.9999999998162429		1328	1	0.9999999756833443			1328	1	0.9999384542617661		1328	1	0.658205		1328	1	0.9827844578918282		1328	1	0.9977037071630835
1329	1	1		1329	1	0.9999999998623617		1329	1	0.9999999998875254		1329	1	0.9999999999504525			1329	1	0.9988630740887061		1329	1	0.854145		1329	1	0.9979693000259098		1329	1	0.9999193005428317
1330	1	1		1330	1	0.9999999999997592		1330	1	1		1330	1	0.9999999998576262			1330	1	0.999977		1330	1	0.986269		1330	1	0.9949189308466588		1330	1	0.9997430896435844
1331	1	1		1331	1	0.9999999978333624		1331	1	0.9999999999993557		1331	1	0.9999999998532821			1331	1	0.9999972602433259		1331	1	0.895574		1331	1	0.968575		1331	1	0.9995963816043031
1332	1	1		1332	1	0.9999999999587387		1332	1	1		1332	1	0.9999999999863107			1332	1	0.9999703923368816		1332	1	0.759442		1332	1	0.9968666125414531		1332	1	0.9993295680187663
1333	1	1		1333	1	0.9999996714020416		1333	1	0.9999999999850877		1333	1	0.9999999993316753			1333	1	0.9999946096632031		1333	1	0.928462		1333	1	0.9889209590827992		1333	1	0.9975763323695657
1334	1	1		1334	1	0.9999998322114017		1334	1	0.9999999998924465		1334	1	0.9999999997391306			1334	1	0.9999869413515725		1334	1	0.181202		1334	1	0.9715058459206536		1334	1	0.9970391739844161
1335	1	1		1335	1	0.9999999996982543		1335	1	1		1335	1	0.9999999961524381			1335	1	0.9999739610873758		1335	1	0.803093		1335	1	0.9995612700293318		1335	1	0.9996335558787595
1336	1	1		1336	1	0.9999999996449245		1336	1	0.9999999999999982		1336	1	1			1336	1	0.9999891083912591		1336	1	0.874832		1336	1	0.9987326822455272		1336	1	0.9994745086736608
1337	1	1		1337	1	0.9999999055775567		1337	1	0.9999999999366057		1337	1	1			1337	1	0.9999998815139342		1337	1	0.327129		1337	1	0.9968921106921901		1337	1	0.9992705367596822
1338	1	1		1338	1	0.9999999999205599		1338	1	0.9999999999999303		1338	1	0.9999999984919409			1338	1	0.9999999169581957		1338	1	0.61112		1338	1	0.9952900607865405		1338	1	0.9916036466634693
1339	1	1		1339	1	0.9999999944487082		1339	1	0.9999999999997685		1339	1	0.9999999985798151			1339	1	1		1339	1	0.615327		1339	1	0.9974659225038355		1339	1	0.9963986244310649
1340	1	1		1340	1	0.9999999999994326		1340	1	0.9999999999337326		1340	1	0.9999999864403819			1340	1	0.9999995842927681		1340	1	0.9068		1340	1	0.993437		1340	1	0.9999028811242644
1341	1	1		1341	1	0.9999999988120175		1341	1	0.9999999999999729		1341	1	0.9999999994780422			1341	1	1		1341	1	0.848698		1341	1	0.9934326113109593		1341	1	0.9996819724612122
1342	1	1		1342	1	0.9999999998451815		1342	1	0.9999999999999963		1342	1	0.9999999994551286			1342	1	0.9998216418538235		1342	1	0.5737		1342	1	0.36880366526541103		1342	1	0.32464005203329493
1343	1	1		1343	1	0.9999977615456708		1343	1	1		1343	1	0.9999999984631882			1343	1	0.9999936673081501		1343	1	0.93261		1343	1	0.9563957722308005		1343	1	0.9971536722138246
1344	1	1		1344	1	0.9999999954272517		1344	1	0.9999999999999034		1344	1	1			1344	1	0.9999993407367773		1344	1	0.824371		1344	1	0.9991643600968657		1344	1	0.99727
1345	1	1		1345	1	0.9999999993843142		1345	1	0.9999999947653814		1345	1	0.9999999566409642			1345	1	0.9999914580230976		1345	1	0.55946		1345	1	0.8490183201931498		1345	1	0.9329663973902814
1346	1	1		1346	1	0.9999999993897319		1346	1	0.9999999999999623		1346	1	0.9999999999459488			1346	1	0.9998945150356461		1346	1	0.975552		1346	1	0.9881745322474328		1346	1	0.9975161102997782
1347	1	1		1347	1	1		1347	1	1		1347	1	0.9999999999938164			1347	1	0.9999972478170356		1347	1	0.941751		1347	1	0.9997037735433805		1347	1	0.9998108355050186
1348	1	1		1348	1	1		1348	1	0.9999999996150941		1348	1	0.9999999996050746			1348	1	0.9998555652299503		1348	1	0.597024		1348	1	0.9961940750017525		1348	1	0.9997794274066016
1349	1	1		1349	1	0.9999999917566703		1349	1	1		1349	1	0.9999999989735371			1349	1	0.9999971988311723		1349	1	0.423937		1349	1	0.9760203460889314		1349	1	0.9992044561940292
1350	1	1		1350	1	0.9999999999999548		1350	1	0.9999999999992379		1350	1	0.9999995232701957			1350	1	0.9992925178375984		1350	1	0.928532		1350	1	0.9989926750141978		1350	1	0.9996072709197177
1351	1	0.9999999999999982		1351	1	0.9999999999999333		1351	1	0.9999999999779033		1351	1	0.9999999694780973			1351	1	0.9999270887934836		1351	1	0.415176		1351	1	0.9839190521168379		1351	1	0.9965592175967815
1352	1	0.9999999999998862		1352	1	0.9999999999957282		1352	1	0.9999999999913015		1352	1	0.9999988326991166			1352	1	0.99837		1352	1	0.450112		1352	1	0.9881820561264926		1352	1	0.9982018996530021
1353	1	0.9999999999998886		1353	1	1		1353	1	0.9999999999073262		1353	1	0.9999994242699768			1353	1	0.9996454997061801		1353	1	0.899942		1353	1	0.9957445916711003		1353	1	0.9995771898401692
1354	1	0.9999999999999896		1354	1	0.9999999999820821		1354	1	0.9999999977138423		1354	1	0.9999978535792683			1354	1	0.9999090517774301		1354	1	0.952283		1354	1	0.9709768911984783		1354	1	0.9969845308434934
1355	1	1		1355	1	0.9999999999941832		1355	1	0.9999999913227048		1355	1	0.9999998279781246			1355	1	0.9999758438587111		1355	1	0.531344		1355	1	0.9989782562493742		1355	1	0.9995738706421996
1356	1	1		1356	1	1		1356	1	0.9999999999601158		1356	1	0.9999999898799589			1356	1	0.9999933531054959		1356	1	0.953448		1356	1	0.986932		1356	1	0.9985964836736436
1357	1	1		1357	1	1		1357	1	0.9999999998063263		1357	1	0.9999999734379187			1357	1	0.9999998731096231		1357	1	0.880953		1357	1	0.9992080824443991		1357	1	0.99949
1358	1	1		1358	1	0.9999999999999964		1358	1	1		1358	1	0.9999997084959844			1358	1	0.9999724814009255		1358	1	0.923699		1358	1	0.9575218856145598		1358	1	0.9978714940782164
1359	1	0.9999999999999906		1359	1	0.9999999999680761		1359	1	0.9999999998210596		1359	1	0.9999996669327924			1359	1	0.9999604801720914		1359	1	0.938192		1359	1	0.9777548613005644		1359	1	0.9968675876991884
1360	1	0.9999999999999997		1360	1	0.9791810887544905		1360	1	0.9999608122973074		1360	1	0.9959567519716486			1360	1	0.9937432047759148		1360	1	0.142487		1360	1	0.2556749992185013		1360	1	0.20504270716847525
1361	1	0.9999999999999997		1361	1	0.9999999999988122		1361	1	0.9999999999996587		1361	1	0.9999999284851373			1361	1	0.9841493152005657		1361	1	0.769565		1361	1	0.975779		1361	1	0.9978480427913283
1362	1	1		1362	1	0.9999999999999978		1362	1	0.9999999997631805		1362	1	0.9999996879293827			1362	1	0.999999		1362	1	0.955585		1362	1	0.9888582975073218		1362	1	0.9981492908480365
1363	1	0.9999999999999997		1363	1	0.9999999999999994		1363	1	0.9999999999990372		1363	1	0.9999977931938706			1363	1	0.9996331093479803		1363	1	0.924837		1363	1	0.9945154658704836		1363	1	0.999467
1364	1	0.9999999999999966		1364	1	0.9999999999999856		1364	1	0.9999999999993056		1364	1	0.9999994919562806			1364	1	0.9985533825616499		1364	1	0.927129		1364	1	0.9991659721689576		1364	1	0.9994180140639551
1365	1	1		1365	1	0.9999999999987252		1365	1	0.9999999996679164		1365	1	0.9999999986335391			1365	1	0.9964885001972764		1365	1	0.738601		1365	1	0.9931614349410497		1365	1	0.99979
1366	1	1		1366	1	0.9999999987104999		1366	1	0.9999999999981862		1366	1	0.9999999467141548			1366	1	0.9999998082452765		1366	1	0.405391		1366	1	0.7224820608586654		1366	1	0.9833274150400728
1367	1	1		1367	1	1		1367	1	0.9999999997414174		1367	1	0.9999998087143417			1367	1	0.9999510569167955		1367	1	0.943877		1367	1	0.9842190092252252		1367	1	0.9976702136701951
1368	1	1		1368	1	0.9999999999946537		1368	1	0.9999999999920928		1368	1	0.9999995480804357			1368	1	0.9997254610761431		1368	1	0.863587		1368	1	0.994235		1368	1	0.9996731830809742
1369	1	0.9999999999999954		1369	1	0.9999999999999648		1369	1	0.9999999999996866		1369	1	0.9999993525035752			1369	1	0.9994730604789095		1369	1	0.92284		1369	1	0.9987372158898467		1369	1	0.9995736890326512
1370	1	1		1370	1	0.9999999999808428		1370	1	0.9999996336897686		1370	1	0.999997			1370	1	0.9999862382232677		1370	1	0.659761		1370	1	0.998854		1370	1	0.9994313866166322
1371	1	1		1371	1	0.9999999556724065		1371	1	0.9999999999992621		1371	1	0.9999999732767424			1371	1	0.9999844590737584		1371	1	0.976077		1371	1	0.9979517216168016		1371	1	0.9949458510790935
1372	1	0.9999999999999933		1372	1	0.9999999999802442		1372	1	0.9999999999997508		1372	1	1			1372	1	0.9999672807984271		1372	1	0.533719		1372	1	0.9916047434255932		1372	1	0.9979817963252294
1373	1	0.9999999999336102		1373	1	0.9999997687209791		1373	1	0.9999988316806497		1373	1	0.9999881579884896			1373	1	0.999871		1373	1	0.989917		1373	1	0.9883937717920123		1373	1	0.9987886497329782
1374	1	1		1374	1	0.9999256388997819		1374	1	0.9998680548179822		1374	1	0.9982974437116888			1374	1	0.9997143029926568		1374	1	0.852124		1374	1	0.9790506321962816		1374	1	0.7750637139459019
1375	1	1		1375	1	0.9999999457896822		1375	1	0.9999999999878977		1375	1	0.9999996207417029			1375	1	0.9893045824290794		1375	1	0.533394		1375	1	0.9913252674968605		1375	1	0.9993805074027995
1376	1	1		1376	1	0.9999999999588605		1376	1	0.9999999999999603		1376	1	0.9999999984311383			1376	1	0.9997795468365591		1376	1	0.923807		1376	1	0.9952659594155411		1376	1	0.9972680509398992
1377	1	1		1377	1	0.9999999968080459		1377	1	0.9999999999983249		1377	1	1			1377	1	0.9998711405755778		1377	1	0.480408		1377	1	0.9860968449653504		1377	1	0.9867128450336413
1378	1	1		1378	1	0.9999999873994532		1378	1	0.9999999831426649		1378	1	1			1378	1	0.9988677425241518		1378	1	0.932393		1378	1	0.9997589022645317		1378	1	0.9978824047648571
1379	1	0.9999999999999969		1379	1	0.9999999999998883		1379	1	0.9999999999979526		1379	1	0.9999999641351528			1379	1	0.999996		1379	1	0.90031		1379	1	0.9973747144580288		1379	1	0.9991279136158571
1380	1	1		1380	1	0.9999999991305446		1380	1	0.9999999995782167		1380	1	0.999999			1380	1	0.999887		1380	1	0.963304		1380	1	0.9961380087857492		1380	1	0.9978075400609491
1381	1	1		1381	1	0.9999999999639051		1381	1	0.9999999999986058		1381	1	0.9999999981889282			1381	1	0.9997979085616324		1381	1	0.935222		1381	1	0.9936696856648738		1381	1	0.9982754787005331
1382	1	1		1382	1	0.9999999990285277		1382	1	0.9999999999751562		1382	1	0.9999999312599513			1382	1	0.9941960198999119		1382	1	0.306694		1382	1	0.48380407015106675		1382	1	0.9022981062568488
1383	1	1		1383	1	0.9999999993124576		1383	1	0.9999999996188915		1383	1	0.9999997270512673			1383	1	0.9998683945536253		1383	1	0.95489		1383	1	0.9682435669208447		1383	1	0.9934347148119501
1384	1	1		1384	1	0.9999999998765504		1384	1	0.9999999999279099		1384	1	0.9999999966556212			1384	1	0.866346		1384	1	0.638815		1384	1	0.9974202705507151		1384	1	0.9957977571355726
1385	1	1		1385	1	0.9999999999614393		1385	1	1		1385	1	0.9999949189845256			1385	1	0.9999834057105622		1385	1	0.704299		1385	1	0.9988136972315227		1385	1	0.9993592714908551
1386	1	0.9999999999139191		1386	1	1		1386	1	0.9999999891059428		1386	1	0.9999973042569867			1386	1	0.9975878055390234		1386	1	0.423548		1386	1	0.991459		1386	1	0.9986862343378284
1387	1	1		1387	1	0.9999999961202289		1387	1	0.9999999991298453		1387	1	0.9999975556532559			1387	1	0.9999830226260222		1387	1	0.892954		1387	1	0.9962002884798925		1387	1	0.9980983070745457
1388	1	0.9999999999999993		1388	1	0.9999999999967442		1388	1	0.9999999999863123		1388	1	0.9999999976891775			1388	1	0.9987187616794511		1388	1	0.801872		1388	1	0.9905902849366756		1388	1	0.995589
1389	1	1		1389	1	0.9999999996321938		1389	1	0.9999999999982273		1389	1	0.9999999994371843			1389	1	0.9999265412431819		1389	1	0.677571		1389	1	0.9952096437265799		1389	1	0.9815022695069338
1390	1	1		1390	1	0.9999999999970182		1390	1	0.9999999999912778		1390	1	0.9999999956721044			1390	1	0.9999519133714253		1390	1	0.89329		1390	1	0.9940757016161565		1390	1	0.9984187230088165
1391	1	1		1391	1	0.9999988963145352		1391	1	0.9999999999811315		1391	1	0.9999996911629199			1391	1	0.9914180787524473		1391	1	0.562776		1391	1	0.9888066902948773		1391	1	0.9993363335651857
1392	1	1		1392	1	0.9999999999106639		1392	1	0.9999591203711653		1392	1	0.999996			1392	1	0.9999162560341115		1392	1	0.158173		1392	1	0.8063383540714546		1392	1	0.9533455053267128
1393	1	1		1393	1	0.9999999997469501		1393	1	1		1393	1	0.9999998806703955			1393	1	0.9872269679236292		1393	1	0.725395		1393	1	0.998667		1393	1	0.9836341181341124
1394	1	1		1394	1	1		1394	1	0.9999999999866858		1394	1	0.9999999677982551			1394	1	0.9975610630279304		1394	1	0.405045		1394	1	0.9970558034016904		1394	1	0.9994083018348741
1395	1	1		1395	1	0.9999999999964772		1395	1	1		1395	1	0.9999960603076173			1395	1	0.9995265161861708		1395	1	0.982464		1395	1	0.9998957489344763		1395	1	0.9998388643492505
1396	1	1		1396	1	0.9999999999832718		1396	1	1		1396	1	1			1396	1	0.991122		1396	1	0.836227		1396	1	0.9995565044536692		1396	1	0.9986897243534771
1397	1	1		1397	1	0.9999999877321826		1397	1	0.9999997662732218		1397	1	0.9999972232969911			1397	1	0.908505		1397	1	0.662658		1397	1	0.9973536226015959		1397	1	0.9953666572049725
1398	1	1		1398	1	0.9999999773165769		1398	1	1		1398	1	0.9999999448877617			1398	1	0.9998421454578726		1398	1	0.858532		1398	1	0.9700693101297047		1398	1	0.9993220475438503
1399	1	0.9999999999997371		1399	1	0.9999999994958539		1399	1	0.9999999987933489		1399	1	0.9999997564357893			1399	1	0.9995001514289594		1399	1	0.559734		1399	1	0.993967		1399	1	0.9983100072911966
1400	1	0.9999999999958351		1400	1	0.9999994793125064		1400	1	0.9999977912763185		1400	1	0.9999984445277975			1400	1	0.9998069145414031		1400	1	0.106907		1400	1	0.0972103		1400	1	0.11780468841862872
1401	1	0.9999999999999274		1401	1	0.9999990161598867		1401	1	0.9999993127268345		1401	1	0.9994789894051361			1401	1	0.9999932161165728		1401	1	0.593641		1401	1	0.9665016979650604		1401	1	0.994263
1402	1	1		1402	1	0.9999999304426417		1402	1	0.9999999992575248		1402	1	0.9999994069011322			1402	1	0.9998928585653053		1402	1	0.923418		1402	1	0.9919238137155151		1402	1	0.997923
1403	1	0.9999999999999993		1403	1	0.9999999889409951		1403	1	0.9999999987871369		1403	1	0.9999993967996584			1403	1	0.9999873894793491		1403	1	0.991264		1403	1	0.9910201390911986		1403	1	0.999808
1404	1	1		1404	1	0.9999928592605919		1404	1	0.9999380255636487		1404	1	0.9999346072881927			1404	1	1		1404	1	0.225164		1404	1	0.18371278401553978		1404	1	0.11966770562666017
1405	1	1		1405	1	0.9999992383692147		1405	1	0.9999999979118418		1405	1	0.9999975069647284			1405	1	0.9999949290524773		1405	1	0.864133		1405	1	0.9682844340640353		1405	1	0.9985810877588712
1406	1	1		1406	1	0.9999617041933342		1406	1	0.9999997738146025		1406	1	0.9999996290465716			1406	1	0.9999321762561847		1406	1	0.471828		1406	1	0.28873966823424024		1406	1	0.43072809490076913
1407	1	1		1407	1	0.9999993027265605		1407	1	0.9999861556264745		1407	1	0.9999923659623725			1407	1	0.9999980510495182		1407	1	0.917502		1407	1	0.8644930098944343		1407	1	0.995016
1408	1	0.9999999999999997		1408	1	0.9999999933517043		1408	1	0.9999999851442334		1408	1	0.9999999752517947			1408	1	0.9712653977835789		1408	1	0.900886		1408	1	0.9917676753218434		1408	1	0.9934848377386374
1409	1	1		1409	1	0.9999999961892301		1409	1	0.9999999958621085		1409	1	0.9999998149243214			1409	1	0.9746209690609033		1409	1	0.899596		1409	1	0.9458067260602814		1409	1	0.9909978457690307
1410	1	1		1410	1	1		1410	1	1		1410	1	0.9999999996326671			1410	1	0.9999082363216074		1410	1	0.919461		1410	1	0.9990610165111389		1410	1	0.9849562084429951
1411	1	1		1411	1	0.9999999984519212		1411	1	0.9999999871726032		1411	1	0.9999999731091332			1411	1	0.9814358574239856		1411	1	0.931194		1411	1	0.961014		1411	1	0.9928085074920329
1412	1	1		1412	1	0.9999999986993802		1412	1	0.9999999992294244		1412	1	0.9999999834556627			1412	1	0.9767473673107449		1412	1	0.622924		1412	1	0.8809086404318788		1412	1	0.9618036548474622
1413	1	1		1413	1	1		1413	1	0.9999999968637622		1413	1	0.9999999740082804			1413	1	0.9999942148226442		1413	1	0.865498		1413	1	0.7609740595643761		1413	1	0.6516896400987043
1414	1	1		1414	1	0.9999999998595668		1414	1	0.9999999998884392		1414	1	0.9999999996490411			1414	1	0.9259948466610052		1414	1	0.389029		1414	1	0.5911413126498732		1414	1	0.8316222441667858
1415	1	1		1415	1	0.9999999972230548		1415	1	0.9999993359355431		1415	1	0.9999961386134754			1415	1	0.9641584594642092		1415	1	0.696762		1415	1	0.6011250885692235		1415	1	0.980287
1416	1	1		1416	1	0.9999966960157944		1416	1	0.9999935636009317		1416	1	0.9999628880649241			1416	1	0.9997166324314353		1416	1	0.188181		1416	1	0.024870151633386392		1416	1	0.0588353
1417	1	0.9999999999999997		1417	1	0.9999990444473207		1417	1	0.9999999999393656		1417	1	0.9999999640330818			1417	1	0.9913341057615448		1417	1	0.773263		1417	1	0.8818627558965021		1417	1	0.9887193739407385
1418	1	1		1418	1	0.9999999230178642		1418	1	0.9999999257511051		1418	1	0.9999715980370517			1418	1	0.5505076272352322		1418	1	0.732895		1418	1	0.6100933849044562		1418	1	0.6829228502331122
1419	1	1		1419	1	0.9999982968651991		1419	1	0.9999996589843045		1419	1	0.9999741207928048			1419	1	0.9487563536999994		1419	1	0.0456832		1419	1	0.21131886997584529		1419	1	0.2504555971830563
1420	1	1		1420	1	1		1420	1	0.9999999758095799		1420	1	0.9999990579878597			1420	1	0.9999265059818999		1420	1	0.947326		1420	1	0.7636247117660921		1420	1	0.9690147115213668
1421	1	1		1421	1	0.9999993926281526		1421	1	0.9999999999787014		1421	1	0.9999997563650167			1421	1	0.9194899891449986		1421	1	0.770082		1421	1	0.9625781472540677		1421	1	0.9965451170602161
1422	1	1		1422	1	1		1422	1	0.9999999998411951		1422	1	0.999997			1422	1	0.3970376033462518		1422	1	0.637986		1422	1	0.7399535658571942		1422	1	0.8995037217754636
1423	1	1		1423	1	0.9999999997080922		1423	1	0.9999999999997747		1423	1	0.9999999996859605			1423	1	0.9999809031051735		1423	1	0.909692		1423	1	0.9898289547711357		1423	1	0.9985237683979686
1424	1	1		1424	1	0.9998817654295733		1424	1	0.9999999419432083		1424	1	0.9999975282382554			1424	1	0.9969281264330282		1424	1	0.364839		1424	1	0.3042658477347581		1424	1	0.3451684695999698
1425	1	1		1425	1	1		1425	1	0.9999999999979964		1425	1	0.9999999726844833			1425	1	0.9999971829460514		1425	1	0.862595		1425	1	0.9951832994790221		1425	1	0.9984307170020771
1426	1	0.9999999999957692		1426	1	0.9999999750262427		1426	1	1		1426	1	0.9999990436778264			1426	1	0.9323627502857426		1426	1	0.810839		1426	1	0.9950260398306886		1426	1	0.9917046967165959
1427	1	1		1427	1	0.9999999998058746		1427	1	0.9999999999999217		1427	1	1			1427	1	0.9999973171553898		1427	1	0.839265		1427	1	0.9829477400974657		1427	1	0.9981555209355552
1428	1	0.9999999997256865		1428	1	0.9999999423877441		1428	1	0.9999999994519875		1428	1	0.9999986240479508			1428	1	0.9467689952100815		1428	1	0.685928		1428	1	0.9700564340978647		1428	1	0.9845963281765229
1429	1	1		1429	1	0.9999605586124956		1429	1	0.9999999979651966		1429	1	0.9999988428336838			1429	1	0.9995668251976044		1429	1	0.260368		1429	1	0.8325792129530402		1429	1	0.9454903700338435
1430	1	1		1430	1	0.9999999828019764		1430	1	0.9999999208500131		1430	1	0.9999999522537384			1430	1	0.9999999999971083		1430	1	0.997983		1430	1	0.9721566073250845		1430	1	0.9916831248079693
1431	1	1		1431	1	0.9999999827367237		1431	1	0.9999999995253203		1431	1	0.9999999555255337			1431	1	0.9999770510980116		1431	1	0.862777		1431	1	0.9895025956682734		1431	1	0.9992167592517672
1432	1	1		1432	1	1		1432	1	0.9999999999956858		1432	1	0.9999992380669063			1432	1	0.9999976467976203		1432	1	0.36908		1432	1	0.3283080076606931		1432	1	0.18288396752330938
1433	1	1		1433	1	0.9999999998786643		1433	1	1		1433	1	0.9999999935422373			1433	1	0.999998		1433	1	0.370153		1433	1	0.9639621699306089		1433	1	0.9940751197434454
1434	1	1		1434	1	0.9999999688248989		1434	1	0.9999999975397474		1434	1	0.9999450752333278			1434	1	0.9999986085985585		1434	1	0.365547		1434	1	0.3639292712953693		1434	1	0.6080302258205978
1435	1	1		1435	1	0.9999999999643151		1435	1	0.9999999999910737		1435	1	0.9999999817947401			1435	1	0.9999992432997369		1435	1	0.237165		1435	1	0.15864586470710318		1435	1	0.4109519351347062
1436	1	1		1436	1	0.9999999990434991		1436	1	0.9999999952970419		1436	1	0.9999997447173782			1436	1	0.9999999396648703		1436	1	0.689825		1436	1	0.983606		1436	1	0.9980271898529931
1437	1	1		1437	1	0.9999999978705533		1437	1	1		1437	1	0.9999999573895746			1437	1	0.9999788799094093		1437	1	0.750782		1437	1	0.9730700389997204		1437	1	0.998443
1438	1	1		1438	1	0.9999991431905872		1438	1	0.9999964909586049		1438	1	0.9999750165770783			1438	1	0.9997583008557058		1438	1	0.583056		1438	1	0.9734301638071546		1438	1	0.9954554646170334
1439	1	1		1439	1	0.9999999963695742		1439	1	0.9999999950708354		1439	1	1			1439	1	0.9999999997798887		1439	1	0.392898		1439	1	0.26838293786130724		1439	1	0.2960506614537327
1440	1	1		1440	1	0.9999999980831615		1440	1	0.9999999999925699		1440	1	0.9999984572774889			1440	1	0.9999686981784852		1440	1	0.748234		1440	1	0.8777748958031457		1440	1	0.9784310602360544
1441	1	1		1441	1	0.9999999999901411		1441	1	0.9999999999861564		1441	1	0.9999997349739218			1441	1	0.9997976103127737		1441	1	0.487032		1441	1	0.6826429139392213		1441	1	0.983173
1442	1	1		1442	1	0.9999997820283695		1442	1	1		1442	1	0.999991			1442	1	0.998997		1442	1	0.602701		1442	1	0.9796290842364849		1442	1	0.9966345240464909
1443	1	1		1443	1	0.9999999394231452		1443	1	0.9999998528455797		1443	1	0.9999999813592222			1443	1	0.9999893146717016		1443	1	0.728066		1443	1	0.9973849571018448		1443	1	0.9986538328359186
1444	1	1		1444	1	0.9992426324356112		1444	1	0.9999749889243376		1444	1	0.999997			1444	1	0.9999987796687152		1444	1	0.430078		1444	1	0.604389		1444	1	0.8429465355773789
1445	1	1		1445	1	0.9999998943047234		1445	1	0.9999999999658614		1445	1	0.9999997915701238			1445	1	0.999997		1445	1	0.320995		1445	1	0.9209692807367005		1445	1	0.9729623946674211
1446	1	1		1446	1	0.9999897921775442		1446	1	0.9999999847482851		1446	1	0.9999967816241772			1446	1	0.9999773062664629		1446	1	0.387656		1446	1	0.561923		1446	1	0.8950263102808805
1447	1	1		1447	1	0.9999999753278057		1447	1	0.9999999999866669		1447	1	0.9999998720094386			1447	1	0.9999977945932947		1447	1	0.26389		1447	1	0.8530768479814144		1447	1	0.9520929409799683
1448	1	1		1448	1	1		1448	1	0.9999999996838006		1448	1	0.9999995951133448			1448	1	0.9999968003840032		1448	1	0.301771		1448	1	0.9100745142710488		1448	1	0.9715730227253476
1449	1	1		1449	1	0.9999793451034844		1449	1	0.9999999790928247		1449	1	0.9999992653909676			1449	1	0.9999989501342874		1449	1	0.32065		1449	1	0.3340732242683742		1449	1	0.6931379616387717
1450	1	1		1450	1	0.9999999998486668		1450	1	0.9999999998798934		1450	1	0.9999999966021357			1450	1	0.9998882138233526		1450	1	0.662806		1450	1	0.9804872346748593		1450	1	0.9739211912597693
1451	1	1		1451	1	0.9999999999996205		1451	1	0.9999999999792438		1451	1	0.9999999964195749			1451	1	0.9999892352986414		1451	1	0.996949		1451	1	0.9992955600317165		1451	1	0.999321
1452	1	1		1452	1	0.9999999822188024		1452	1	0.9999999972062178		1452	1	1			1452	1	0.9978569166890929		1452	1	0.33693		1452	1	0.9987100023246664		1452	1	0.9859536392863589
1453	1	1		1453	1	0.9999999999982011		1453	1	0.9999999604478503		1453	1	0.9999999544459921			1453	1	0.9999805227273655		1453	1	0.969636		1453	1	0.9581904428029164		1453	1	0.9967427615238402
1454	1	1		1454	1	0.9999999995952543		1454	1	0.9999999999660701		1454	1	0.9999999997299004			1454	1	0.9999274280007368		1454	1	0.959835		1454	1	0.9996845101319293		1454	1	0.9871955316246229
1455	1	1		1455	1	0.9999999999990254		1455	1	0.9999999998124982		1455	1	0.9999999968197403			1455	1	0.9995472353293192		1455	1	0.994515		1455	1	0.996887		1455	1	0.9974785590716949
1456	1	1		1456	1	0.9999999999820102		1456	1	0.9999999910179227		1456	1	0.9999998833989916			1456	1	0.9963421291784651		1456	1	0.993088		1456	1	0.9977860828958599		1456	1	0.9852332287309566
1457	1	1		1457	1	0.9999999999999923		1457	1	0.9999999999546367		1457	1	0.9999999992306137			1457	1	0.9999048440926802		1457	1	0.992105		1457	1	0.9991378062545674		1457	1	0.9990056698457978
1458	1	1		1458	1	1		1458	1	0.9999999961188721		1458	1	0.9999999922040289			1458	1	0.9995256319974354		1458	1	0.992906		1458	1	0.959728		1458	1	0.998479
1459	1	1		1459	1	0.9999999967347446		1459	1	0.9999999972332378		1459	1	0.9999999784734737			1459	1	0.996819		1459	1	0.854684		1459	1	0.9960765469682509		1459	1	0.967444
1460	1	1		1460	1	0.9999999999871906		1460	1	0.9999999902797465		1460	1	0.9999998657812768			1460	1	0.9998860620271306		1460	1	0.868476		1460	1	0.9987174722130259		1460	1	0.9929045147887746
1461	1	1		1461	1	0.9999999999996477		1461	1	0.9999999894521938		1461	1	0.9999999701550034			1461	1	0.990428		1461	1	0.900951		1461	1	0.9267217128728469		1461	1	0.996582
1462	1	1		1462	1	0.9999999986435315		1462	1	0.9999999999477491		1462	1	0.9999999993017059			1462	1	0.9985734682408154		1462	1	0.558445		1462	1	0.9189392267695174		1462	1	0.983562
1463	1	1		1463	1	1		1463	1	0.9999999998014057		1463	1	0.9999999964123082			1463	1	0.9999840828691153		1463	1	0.987455		1463	1	0.9974530132712961		1463	1	0.9979848398867127
1464	1	1		1464	1	0.9999999999999957		1464	1	0.9999999998533151		1464	1	0.9999999990534029			1464	1	0.9999988735434684		1464	1	0.912014		1464	1	0.9909896264752672		1464	1	0.9958185112586955
1465	1	1		1465	1	0.9999999999994442		1465	1	0.9999999990422198		1465	1	0.9999999920083379			1465	1	0.9989500957217766		1465	1	0.979935		1465	1	0.9963685623302745		1465	1	0.9966842981809089
1466	1	1		1466	1	1		1466	1	0.9999999999271886		1466	1	0.9999999958406918			1466	1	0.9871968729274958		1466	1	0.98203		1466	1	0.9979403441501564		1466	1	0.9988082088765411
1467	1	1		1467	1	0.9999999999441799		1467	1	0.9999999972437408		1467	1	0.9999999403976719			1467	1	0.9823492669507536		1467	1	0.912809		1467	1	0.9983298763039372		1467	1	0.9984552031588553
1468	1	1		1468	1	0.9999999943110144		1468	1	0.9999952669183089		1468	1	0.999983			1468	1	0.9875599884805006		1468	1	0.624321		1468	1	0.9837250321985619		1468	1	0.9850219126613429
1469	1	1		1469	1	0.9999999999990998		1469	1	0.9999999997934619		1469	1	1			1469	1	0.9980230408644818		1469	1	0.988646		1469	1	0.9973286226495913		1469	1	0.9968883788746633
1470	1	1		1470	1	0.9999999999957385		1470	1	0.9999999999134063		1470	1	0.9999999970590038			1470	1	0.9834889716299785		1470	1	0.959207		1470	1	0.9982146416221348		1470	1	0.9971005658437012
1471	1	1		1471	1	0.9999999999998788		1471	1	0.9999999994816868		1471	1	0.9999999876877177			1471	1	0.9999938930712593		1471	1	0.977963		1471	1	0.9962492802555104		1471	1	0.9984875857617016
1472	1	1		1472	1	0.9999999999882171		1472	1	0.9999999997090818		1472	1	1			1472	1	0.8538184071704674		1472	1	0.388174		1472	1	0.3051073212086897		1472	1	0.19731620253154383
1473	1	1		1473	1	1		1473	1	0.9999986051958292		1473	1	0.9999998831704807			1473	1	0.9997771609145606		1473	1	0.685511		1473	1	0.8449163647376513		1473	1	0.9848870102450463
1474	1	1		1474	1	0.9999999999999962		1474	1	0.9999999993194727		1474	1	0.9999999871062466			1474	1	0.9999574439982213		1474	1	0.989248		1474	1	0.9961181464689991		1474	1	0.9990806241962247
1475	1	1		1475	1	0.9999999999999831		1475	1	0.9999999990032669		1475	1	0.9999999886604652			1475	1	0.981449		1475	1	0.511329		1475	1	0.9955573907251959		1475	1	0.9983369640822723
1476	1	1		1476	1	0.9999999993137046		1476	1	0.9999999995679648		1476	1	0.9999999971970742			1476	1	0.9960980972348141		1476	1	0.779622		1476	1	0.9928353956930333		1476	1	0.9790352230926228
1477	1	1		1477	1	0.9999999997364423		1477	1	0.9999999640713069		1477	1	0.9999998950597594			1477	1	0.9900328418366959		1477	1	0.846465		1477	1	0.9741795633577527		1477	1	0.9713059043595278
1478	1	1		1478	1	0.9999999999999934		1478	1	0.9999999998063511		1478	1	0.9999999957916972			1478	1	0.9998847667160071		1478	1	0.987509		1478	1	0.9936830874364773		1478	1	0.9990942861594767
1479	1	1		1479	1	0.9999999999992529		1479	1	0.9999999997428233		1479	1	0.9999999781590376			1479	1	0.9999895031921024		1479	1	0.776582		1479	1	0.9910232350084968		1479	1	0.9879460401234733
1480	1	1		1480	1	0.9999999999999938		1480	1	0.9999999998292008		1480	1	1			1480	1	0.9999179342671065		1480	1	0.98946		1480	1	0.9967009196627612		1480	1	0.9993181039999258
1481	1	1		1481	1	0.9999999999994884		1481	1	0.9999999998692739		1481	1	0.9999999981082537			1481	1	0.9982484544275627		1481	1	0.984477		1481	1	0.9978128243248605		1481	1	0.9971081815740621
1482	1	1		1482	1	0.9999999999605942		1482	1	0.9999999997618119		1482	1	0.9999998570342856			1482	1	0.8953131051316521		1482	1	0.615809		1482	1	0.5431090267237276		1482	1	0.8717314530258972
1483	1	1		1483	1	0.9999999998335076		1483	1	0.9999999999495648		1483	1	1			1483	1	0.9841204209079643		1483	1	0.453301		1483	1	0.28013275974396074		1483	1	0.4013206314673931
1484	1	1		1484	1	0.9999999999999869		1484	1	0.9999999994286167		1484	1	0.9999999941422014			1484	1	0.9999562021220285		1484	1	0.991121		1484	1	0.9997579977654797		1484	1	0.9995121403219561
1485	1	1		1485	1	1		1485	1	0.9999999999078429		1485	1	0.9999999994677627			1485	1	0.9998455896012529		1485	1	0.382007		1485	1	0.7376520043671613		1485	1	0.8358213764973123
1486	1	1		1486	1	0.9999999988788926		1486	1	0.9999999990766154		1486	1	0.9999998532878439			1486	1	0.9986089975725819		1486	1	0.935333		1486	1	0.9824569755949873		1486	1	0.9979876604176672
1487	1	1		1487	1	0.9999999999999946		1487	1	0.9999999996902046		1487	1	0.9999999952799239			1487	1	0.999896		1487	1	0.98679		1487	1	0.9974350127489514		1487	1	0.9992176856618958
1488	1	1		1488	1	0.9999999982405275		1488	1	0.9999999954927972		1488	1	0.9999999436653687			1488	1	0.9999294015377644		1488	1	0.534253		1488	1	0.9086856917101325		1488	1	0.9869658024616106
1489	1	1		1489	1	0.9999999952344019		1489	1	0.9999999989163995		1489	1	0.9999999485449267			1489	1	0.9996854799426032		1489	1	0.937196		1489	1	0.9879282172588435		1489	1	0.9938024306327057
1490	1	1		1490	1	0.9999999999968043		1490	1	0.9999999975668364		1490	1	0.9999999919925435			1490	1	0.997735		1490	1	0.975261		1490	1	0.9979105744547131		1490	1	0.9972821355537574
1491	1	1		1491	1	0.9999999998837488		1491	1	0.9999999998684754		1491	1	1			1491	1	0.99886		1491	1	0.903622		1491	1	0.9984758312193074		1491	1	0.9994934693157881
1492	1	1		1492	1	0.9999999999989956		1492	1	0.9999999988255001		1492	1	0.9999999915767925			1492	1	0.999605		1492	1	0.995384		1492	1	0.9951432498403131		1492	1	0.9967857802293199
1493	1	1		1493	1	0.9999999999651354		1493	1	0.9999999999289533		1493	1	0.9999999963338677			1493	1	0.9998725780991385		1493	1	0.764904		1493	1	0.9686299699985259		1493	1	0.9747894825649572
1494	1	0.9999999999999993		1494	1	0.9999999999867705		1494	1	0.9999999978554087		1494	1	0.9999999485848303			1494	1	0.9851555792293128		1494	1	0.991776		1494	1	0.982172		1494	1	0.9936216015718521
1495	1	1		1495	1	0.9999999999990239		1495	1	0.9999999996160138		1495	1	0.9999999961393062			1495	1	0.9983839741347351		1495	1	0.958757		1495	1	0.9978583432047438		1495	1	0.997607
1496	1	1		1496	1	0.9999999999945466		1496	1	0.9999999999745685		1496	1	1			1496	1	0.9880922649993681		1496	1	0.874487		1496	1	0.9953323431748875		1496	1	0.9959419692196337
1497	1	1		1497	1	1		1497	1	0.9999999975989667		1497	1	0.9999999747329845			1497	1	0.9972130198438859		1497	1	0.662038		1497	1	0.9955773492322432		1497	1	0.973262
1498	1	1		1498	1	0.9999999999204814		1498	1	0.9999999895233196		1498	1	0.9999996902440508			1498	1	0.9994194617297283		1498	1	0.694326		1498	1	0.7495651844158266		1498	1	0.9739508814005612
1499	1	1		1499	1	0.9999999999994886		1499	1	0.9999999986461876		1499	1	1			1499	1	0.996402		1499	1	0.871629		1499	1	0.9924749726473341		1499	1	0.9981994828918489
1500	1	0.9999999999989839		1500	1	0.9999215068604869		1500	1	0.9999957358188036		1500	1	0.9998659861619149			1500	1	0.9693176876605636		1500	1	0.168287		1500	1	0.9460187509563837		1500	1	0.9146282359764665
1501	1	0.9999393800956987		1501	1	0.7843740644507605		1501	1	0.431119		1501	1	0.43508297104295746			1501	1	0.886219		1501	1	0.699431		1501	1	0.584297		1501	1	0.27591
1502	1	0.9999999999999997		1502	1	0.9998975455342584		1502	1	0.9999998826126187		1502	1	0.9982704385019235			1502	1	0.3005347469483228		1502	1	0.336605		1502	1	0.3491039404569576		1502	1	0.15063203238800518
1503	1	1		1503	1	1		1503	1	0.9999993041448015		1503	1	0.5943297805743606			1503	1	0.9598319329841118		1503	1	0.166047		1503	1	0.0964967		1503	1	0.1110079891317562
1504	1	1		1504	1	0.9999971862132441		1504	1	0.9999994575289681		1504	1	0.9429203406277895			1504	1	0.9988116148862495		1504	1	0.131105		1504	1	0.0745012		1504	1	0.1379770991625108
1505	1	0.9986183542962433		1505	1	0.00518644		1505	1	0.0540446		1505	1	0			1505	1	0.9288710774930904		1505	1	0.650556		1505	1	0.4568927907878677		1505	1	0.607426
1506	1	1		1506	1	0.9999930157835488		1506	1	0.9997872341399767		1506	1	0.5850039971923378			1506	1	0.9986262917699217		1506	1	0.231648		1506	1	0.21637816970194793		1506	1	0.1943002538821878
1507	1	0.9999999999999993		1507	1	0.9999999466674746		1507	1	0.9999620852129708		1507	1	0.9999997266405349			1507	1	0.999543		1507	1	0.358545		1507	1	0.7804970593800262		1507	1	0.97794
1508	1	1		1508	1	0.9999996518553519		1508	1	1		1508	1	0.9999999349855819			1508	1	0.9999380328499238		1508	1	0.421231		1508	1	0.9402853517136059		1508	1	0.9405469108818083
1509	1	1		1509	1	0.9979030797964443		1509	1	0.9999993671316462		1509	1	0.9991018659168146			1509	1	0.9999850957970065		1509	1	0.341082		1509	1	0.27592036313744356		1509	1	0.5947428917942111
1510	1	1		1510	1	0.9999999826330284		1510	1	0.9999998559730213		1510	1	0.9996756638749522			1510	1	0.9999029238312078		1510	1	0.58813		1510	1	0.9838130900472432		1510	1	0.829549
1511	1	1		1511	1	0.9999999882152913		1511	1	0.9999999998565772		1511	1	0.697702			1511	1	0.9901782339764872		1511	1	0.225036		1511	1	0.7145999230250814		1511	1	0.65471
1512	1	0.9999999999999948		1512	1	0.999806		1512	1	0.9999590888405898		1512	1	0.9889756813484366			1512	1	0.9999998808583613		1512	1	0.502574		1512	1	0.6427952001423374		1512	1	0.986544
1513	1	1		1513	1	0.9999999999665377		1513	1	0.9999999847422552		1513	1	0.999984			1513	1	0.9999986860420115		1513	1	0.142399		1513	1	0.5146630826039933		1513	1	0.5125632174578414
1514	1	1		1514	1	0.9999999999849525		1514	1	0.9999999999915007		1514	1	0.9963379770886484			1514	1	0.9999901485670113		1514	1	0.135023		1514	1	0.19430292356401163		1514	1	0.097803
1515	1	1		1515	1	0.999999		1515	1	0.9999999890422658		1515	1	0.9999858577401278			1515	1	0.9999998047634684		1515	1	0.493488		1515	1	0.8966044120762564		1515	1	0.9316522048155448
1516	1	0.9999999542545339		1516	1	0.9999722481435489		1516	1	0.9999995358862293		1516	1	0.9998000750028401			1516	1	0.9999973557122575		1516	1	0.40953		1516	1	0.9056357745798493		1516	1	0.9909435540621553
1517	1	1		1517	1	0.9999999712320439		1517	1	0.9999999932199753		1517	1	0.9999945026924572			1517	1	0.9999995731672977		1517	1	0.251533		1517	1	0.6510805594746998		1517	1	0.9283881595285826
1518	1	1		1518	1	0.9999999999999479		1518	1	0.9999999999975406		1518	1	0.9999999793412516			1518	1	0.8999988729599296		1518	1	0.870449		1518	1	0.9997699102515619		1518	1	0.9994527491375116
1519	1	1		1519	1	1		1519	1	0.9999999999957738		1519	1	0.9999999070965954			1519	1	0.9949734872252121		1519	1	0.894264		1519	1	0.9948892794688192		1519	1	0.9680751311765603
1520	1	1		1520	1	0.9999999999999025		1520	1	0.9999999999987222		1520	1	0.9999999230749629			1520	1	0.9977007466795845		1520	1	0.795425		1520	1	0.9799256967452962		1520	1	0.991755
1521	1	1		1521	1	1		1521	1	0.9999999999909207		1521	1	1			1521	1	0.9957686690844331		1521	1	0.926816		1521	1	0.9946696559485536		1521	1	0.9992758226924415
1522	1	1		1522	1	0.9999999990088939		1522	1	0.9999999999047824		1522	1	0.9999999554245057			1522	1	0.9989499861134509		1522	1	0.870446		1522	1	0.9932110156170576		1522	1	0.9965285401498434
1523	1	1		1523	1	0.9999999999947319		1523	1	1		1523	1	0.9999968638301822			1523	1	0.9701038753492482		1523	1	0.140764		1523	1	0.8879554776235586		1523	1	0.9148509797125051
1524	1	1		1524	1	0.9999999999743469		1524	1	0.9999999998852257		1524	1	0.9999999985551855			1524	1	0.993162		1524	1	0.935785		1524	1	0.9981728031424848		1524	1	0.9982369108441695
1525	1	1		1525	1	0.9999999999974933		1525	1	0.9999999999189471		1525	1	0.9999991589067064			1525	1	0.9982407613441382		1525	1	0.748831		1525	1	0.9632820543682904		1525	1	0.9819076947306412
1526	1	1		1526	1	1		1526	1	0.9999999999907492		1526	1	0.9999999893148853			1526	1	0.940319		1526	1	0.686935		1526	1	0.9486079099827068		1526	1	0.9898489024765333
1527	1	1		1527	1	1		1527	1	0.9999999999847252		1527	1	0.9999988717417744			1527	1	0.9832125873090981		1527	1	0.955201		1527	1	0.9983227798706894		1527	1	0.9981250776929701
1528	1	1		1528	1	0.9999999999920686		1528	1	0.9999999993859874		1528	1	0.9999984844897976			1528	1	0.9824288690597786		1528	1	0.0883098		1528	1	0.5077899565048678		1528	1	0.868576
1529	1	1		1529	1	1		1529	1	1		1529	1	0.9999994077219438			1529	1	0.9559134020353008		1529	1	0.668575		1529	1	0.9982725971487322		1529	1	0.9915611630371085
1530	1	1		1530	1	0.9999999999955075		1530	1	0.9999999998698887		1530	1	0.9999999996795718			1530	1	0.9993872107761738		1530	1	0.860844		1530	1	0.9839601492019119		1530	1	0.9981924198777632
1531	1	1		1531	1	1		1531	1	0.9999999999762342		1531	1	0.9999997223052187			1531	1	0.9932286383749209		1531	1	0.947735		1531	1	0.9980587204972043		1531	1	0.9995054192216822
1532	1	1		1532	1	0.9999999999981567		1532	1	0.9999999999910015		1532	1	0.9999999997840971			1532	1	0.9964244723209743		1532	1	0.91752		1532	1	0.9928872107270845		1532	1	0.9991176418926744
1533	1	1		1533	1	0.9999997357547056		1533	1	0.9999999955973359		1533	1	0.999999			1533	1	0.9995201485968185		1533	1	0.422986		1533	1	0.8993261137684345		1533	1	0.7434232783743253
1534	1	1		1534	1	0.9999999999997687		1534	1	0.9999999999997354		1534	1	0.9999998560094797			1534	1	0.9890074381921566		1534	1	0.880127		1534	1	0.9933033819965648		1534	1	0.9952569187066447
1535	1	1		1535	1	0.9999999960790222		1535	1	0.9999999870306547		1535	1	0.9999998633190648			1535	1	0.999863		1535	1	0.58947		1535	1	0.9438683816672103		1535	1	0.9885337466721125
1536	1	1		1536	1	0.9999999875423844		1536	1	0.9999999996110542		1536	1	0.9999999931117259			1536	1	0.9998309849353213		1536	1	0.21958		1536	1	0.8006789717530083		1536	1	0.992552
1537	1	1		1537	1	0.9999999999876437		1537	1	0.9999999962263687		1537	1	0.9999999515514726			1537	1	0.9972103116946663		1537	1	0.196438		1537	1	0.9658489651272513		1537	1	0.998745
1538	1	0.9999999999999979		1538	1	0.9999908322503279		1538	1	1		1538	1	0.9999970425725406			1538	1	0.9999994110882285		1538	1	0.483158		1538	1	0.9648539309311233		1538	1	0.9987041875215266
1539	1	1		1539	1	0.9999999999999543		1539	1	0.9999999994576694		1539	1	0.9999999964646011			1539	1	0.9995405446278296		1539	1	0.978627		1539	1	0.9997889067349696		1539	1	0.9993618969006534
1540	1	1		1540	1	1		1540	1	0.9999999076726633		1540	1	0.9999999063660079			1540	1	0.8484092594707962		1540	1	0.197062		1540	1	0.5319783008172007		1540	1	0.9831075119461113
1541	1	1		1541	1	1		1541	1	0.9999999999695259		1541	1	0.9999999983800181			1541	1	0.9987361974701134		1541	1	0.758832		1541	1	0.9827201893324371		1541	1	0.9971943871759129
1542	1	1		1542	1	0.9999999999578069		1542	1	0.9999999988125715		1542	1	0.9999868061212001			1542	1	0.8982030147402448		1542	1	0.258302		1542	1	0.8243874618549907		1542	1	0.9508223685865609
1543	1	1		1543	1	0.9999999999989756		1543	1	0.9999999999771888		1543	1	0.9999999942033602			1543	1	0.999874		1543	1	0.929198		1543	1	0.9986319134116146		1543	1	0.9934403706898225
1544	1	1		1544	1	0.9999999939494046		1544	1	0.9999999999945447		1544	1	1			1544	1	0.9941436858231052		1544	1	0.713247		1544	1	0.9949182635653341		1544	1	0.9994867621685284
1545	1	1		1545	1	0.9999999999863967		1545	1	0.9999999999873241		1545	1	0.9999999966758303			1545	1	0.996358		1545	1	0.926343		1545	1	0.9930784723823349		1545	1	0.9943160542318805
1546	1	1		1546	1	0.9999999982956608		1546	1	0.9999999873959343		1546	1	0.9999998520184349			1546	1	0.9999970664014276		1546	1	0.910498		1546	1	0.9976230333241954		1546	1	0.998003
1547	1	0.9999999999999986		1547	1	0.9999784853522266		1547	1	0.9999982569005363		1547	1	0.9999936023983772			1547	1	0.9999955561089049		1547	1	0.606374		1547	1	0.9536829331417641		1547	1	0.9927745321171058
1548	1	0.9999999999999214		1548	1	0.9999999999292762		1548	1	0.9999991358204013		1548	1	0.9999998818403344			1548	1	0.8666005159703447		1548	1	0.0643793		1548	1	0.35504935437059365		1548	1	0.6995524230020778
1549	1	1		1549	1	0.9999999999638324		1549	1	0.9999999976178399		1549	1	0.9999998348955247			1549	1	0.9999694389614798		1549	1	0.8834		1549	1	0.9982429184440283		1549	1	0.9978820688060931
1550	1	1		1550	1	0.9999999999999428		1550	1	0.9999999997750901		1550	1	0.9999999956815488			1550	1	0.9992289750377776		1550	1	0.979955		1550	1	0.9998062985021183		1550	1	0.999509
1551	1	0.9999999999999997		1551	1	0.9999999712872273		1551	1	0.9999991391525724		1551	1	0.9999861443668454			1551	1	0.9986106625916729		1551	1	0.312172		1551	1	0.510663		1551	1	0.7660286346223122
1552	1	1		1552	1	0.9999999999874998		1552	1	0.9999999983107325		1552	1	0.9999998374660554			1552	1	0.9662647885984684		1552	1	0.330731		1552	1	0.2806445822528521		1552	1	0.8234581735675816
1553	1	1		1553	1	0.9999999999999567		1553	1	1		1553	1	0.9999999980557845			1553	1	0.9993116024266936		1553	1	0.978739		1553	1	0.9998020524758348		1553	1	0.9987216388499278
1554	1	0.9999999999997679		1554	1	0.9999996391344309		1554	1	0.9998373899058034		1554	1	0.9999893723655957			1554	1	0.9987393352665949		1554	1	0.298519		1554	1	0.4017279105112867		1554	1	0.12159797580667187
1555	1	1		1555	1	1		1555	1	0.9999999997713422		1555	1	0.9999970079745188			1555	1	0.9767871116111078		1555	1	0.694951		1555	1	0.9765516816225659		1555	1	0.9951554496348779
1556	1	1		1556	1	0.9999999999999749		1556	1	0.9999999998719856		1556	1	0.9999999992426596			1556	1	0.9955686075949951		1556	1	0.968499		1556	1	0.9997192126117361		1556	1	0.9978011023449792
1557	1	1		1557	1	0.9999999999926135		1557	1	0.9999999963285369		1557	1	0.9999999936515057			1557	1	0.9994700653332006		1557	1	0.974036		1557	1	0.9998636527543747		1557	1	0.9989055070755481
1558	1	1		1558	1	0.9999999999999063		1558	1	0.9999999999186696		1558	1	1			1558	1	0.9957931674223675		1558	1	0.975483		1558	1	0.9992755989831495		1558	1	0.9991810306963945
1559	1	1		1559	1	0.9999999962795681		1559	1	0.9999999600570403		1559	1	0.9999971426111299			1559	1	0.7426455301582683		1559	1	0.363021		1559	1	0.8685595855213286		1559	1	0.9529568980178365
1560	1	0.9999999999999997		1560	1	0.9999999997758775		1560	1	0.9999999999530068		1560	1	0.9999765187704068			1560	1	0.9747618467300223		1560	1	0.159033		1560	1	0.9457877294054778		1560	1	0.9809572656955168
1561	1	1		1561	1	0.9999999999987402		1561	1	0.9999999974541434		1561	1	0.9999999954305244			1561	1	0.9624705382213665		1561	1	0.665146		1561	1	0.9858664971942839		1561	1	0.9913125581940241
1562	1	1		1562	1	0.9999999989886778		1562	1	0.9999968293317157		1562	1	0.9999999781253647			1562	1	0.9999894608572888		1562	1	0.649564		1562	1	0.6870563742005772		1562	1	0.8908490507658503
1563	1	1		1563	1	0.9999999999999483		1563	1	0.9999999999534083		1563	1	0.9999999988802232			1563	1	0.9982979392300106		1563	1	0.961421		1563	1	0.9998183563047193		1563	1	0.9994754997849276
1564	1	1		1564	1	0.9999999999997298		1564	1	0.9999999999984335		1564	1	0.9999996491078028			1564	1	0.976316		1564	1	0.941311		1564	1	0.9992096318585572		1564	1	0.9985273578122024
1565	1	1		1565	1	0.9999999999790073		1565	1	0.9999999999998275		1565	1	0.9999999760449332			1565	1	0.9927356018314751		1565	1	0.97662		1565	1	0.9982126250403154		1565	1	0.9975324928309928
1566	1	1		1566	1	0.9999999999889121		1566	1	0.9999999999976263		1566	1	0.9999988863657958			1566	1	0.9876902966036046		1566	1	0.861557		1566	1	0.9961267260575528		1566	1	0.995427
1567	1	1		1567	1	0.9999999998636971		1567	1	0.9999999999714803		1567	1	0.9999999132036126			1567	1	0.9791768735874972		1567	1	0.69634		1567	1	0.9873657442711758		1567	1	0.9965563040816249
1568	1	1		1568	1	0.9999999999996706		1568	1	0.9999999974946231		1568	1	0.999931			1568	1	0.9357946481165877		1568	1	0.962164		1568	1	0.9991571797568509		1568	1	0.9975107040583211
1569	1	1		1569	1	0.9999999999821361		1569	1	1		1569	1	0.9999955595430942			1569	1	0.9917202916509952		1569	1	0.697961		1569	1	0.9993361277137108		1569	1	0.9917091232614105
1570	1	1		1570	1	1		1570	1	0.9999999999980015		1570	1	0.9999999942029142			1570	1	0.9862307168287305		1570	1	0.853065		1570	1	0.9885491174964018		1570	1	0.9973357745757616
1571	1	1		1571	1	0.9999999999999951		1571	1	0.9999999999965055		1571	1	0.9999999219069352			1571	1	0.9890367718668923		1571	1	0.741355		1571	1	0.9994601089076756		1571	1	0.9990204160985643
1572	1	1		1572	1	0.9999999999374704		1572	1	0.9999999999911436		1572	1	0.9999999880141885			1572	1	0.9359485912448369		1572	1	0.541032		1572	1	0.9187533876156104		1572	1	0.9882422265291838
1573	1	1		1573	1	0.9999999999989402		1573	1	1		1573	1	1			1573	1	0.985936		1573	1	0.899091		1573	1	0.990655		1573	1	0.9915555497587907
1574	1	1		1574	1	0.9999999999997903		1574	1	0.9999999999945149		1574	1	0.9999999610363742			1574	1	0.989471		1574	1	0.855927		1574	1	0.9979041417854364		1574	1	0.997509
1575	1	1		1575	1	1		1575	1	0.9999999999998429		1575	1	0.9999999651583176			1575	1	0.9989395795664577		1575	1	0.778211		1575	1	0.9881054695688679		1575	1	0.9071518255046735
1576	1	1		1576	1	0.9999999982820109		1576	1	0.9999999999852719		1576	1	0.9999999579299811			1576	1	0.999956		1576	1	0.182331		1576	1	0.3314636465944305		1576	1	0.24940221913125193
1577	1	1		1577	1	1		1577	1	0.9999999999943298		1577	1	0.9999969031762266			1577	1	0.9932728614664089		1577	1	0.964885		1577	1	0.9992154069296283		1577	1	0.9996134079014045
1578	1	1		1578	1	0.9999999999999972		1578	1	0.9999999999764272		1578	1	0.999999			1578	1	0.9626388808844074		1578	1	0.914833		1578	1	0.9982422361602372		1578	1	0.9972538793088677
1579	1	1		1579	1	0.9999999997699588		1579	1	0.9999999998716891		1579	1	0.9999999824968833			1579	1	0.9998156078122832		1579	1	0.977691		1579	1	0.9980719356619889		1579	1	0.9988723852818592
1580	1	1		1580	1	0.9999999999999828		1580	1	1		1580	1	0.999985			1580	1	0.9964509274340356		1580	1	0.736463		1580	1	0.9987520408604924		1580	1	0.9959649027060049
1581	1	1		1581	1	0.9999999999999953		1581	1	0.9999999999966476		1581	1	0.9993376286744938			1581	1	0.9560757671939086		1581	1	0.899469		1581	1	0.9984328983632035		1581	1	0.9976299488243695
1582	1	1		1582	1	0.9999999999990408		1582	1	0.9999999999897621		1582	1	0.9999986459878679			1582	1	0.9994520732327483		1582	1	0.882798		1582	1	0.9993717026056428		1582	1	0.9985935469196497
1583	1	1		1583	1	0.9999999999933196		1583	1	1		1583	1	0.9999987056154288			1583	1	0.9972487571488587		1583	1	0.744363		1583	1	0.9784200568996375		1583	1	0.9975894137899226
1584	1	1		1584	1	0.9999999999995121		1584	1	0.9999999986312654		1584	1	0.9999999988068495			1584	1	0.8738156853319243		1584	1	0.542471		1584	1	0.9256996486679481		1584	1	0.9899905282815008
1585	1	1		1585	1	0.9999999999743469		1585	1	0.9999999998852257		1585	1	0.9999999985551855			1585	1	0.993162		1585	1	0.935785		1585	1	0.9981728031424848		1585	1	0.9982369108441695
1586	1	1		1586	1	0.9999999999999524		1586	1	0.9999999999989475		1586	1	0.9999999458654829			1586	1	0.9849586441725994		1586	1	0.943414		1586	1	0.9989550289623887		1586	1	0.9989753156159508
1587	1	1		1587	1	0.9999999999729958		1587	1	0.9999999999993079		1587	1	1			1587	1	0.9912057990928609		1587	1	0.951652		1587	1	0.9985400839316504		1587	1	0.999323
1588	1	1		1588	1	0.9999999999999025		1588	1	0.9999999999987222		1588	1	0.9999999230749629			1588	1	0.9977007466795845		1588	1	0.795425		1588	1	0.9799256967452962		1588	1	0.991755
1589	1	1		1589	1	0.9999999999932493		1589	1	0.9999999999607914		1589	1	0.9999994623008512			1589	1	0.9981		1589	1	0.943782		1589	1	0.9969601597559266		1589	1	0.9979519721477762
1590	1	1		1590	1	1		1590	1	0.9999999999996309		1590	1	0.9999999974861833			1590	1	0.9933376027913917		1590	1	0.957581		1590	1	0.9989341515593313		1590	1	0.9993191379820076
1591	1	1		1591	1	0.9999999999982515		1591	1	0.9999999999976429		1591	1	0.9999988975551843			1591	1	0.9965997439387592		1591	1	0.850351		1591	1	0.997131		1591	1	0.9923835601814401
1592	1	1		1592	1	0.9999999999977753		1592	1	1		1592	1	0.9999999832000872			1592	1	0.9837916772140397		1592	1	0.871607		1592	1	0.9933300888035198		1592	1	0.9984911179708994
1593	1	1		1593	1	1		1593	1	1		1593	1	0.9999999026363025			1593	1	0.9736318525972043		1593	1	0.473136		1593	1	0.9832776737206509		1593	1	0.9963531405284429
1594	1	1		1594	1	0.9999999999999927		1594	1	0.9999999999993836		1594	1	0.9999999482954064			1594	1	0.9939193435484995		1594	1	0.913987		1594	1	0.9993936889221992		1594	1	0.9967317413467852
1595	1	1		1595	1	0.9999999999959742		1595	1	1		1595	1	0.9999999994624761			1595	1	0.9982204595811157		1595	1	0.932587		1595	1	0.9949423002632101		1595	1	0.9991094677706026
1596	1	1		1596	1	0.9999999999982749		1596	1	0.9999999999998228		1596	1	0.9999999582442232			1596	1	0.9892062226422358		1596	1	0.816221		1596	1	0.9975855351286099		1596	1	0.9964972570425173
1597	1	1		1597	1	0.9999999999488467		1597	1	0.9999999997878503		1597	1	0.9999999768766653			1597	1	0.9844605346768613		1597	1	0.56685		1597	1	0.9968942632132078		1597	1	0.9915792925198003
1598	1	1		1598	1	1		1598	1	1		1598	1	0.9999975886311792			1598	1	0.9907502312961828		1598	1	0.828421		1598	1	0.9822115865309399		1598	1	0.9956571905915127
1599	1	1		1599	1	0.9999999999999916		1599	1	1		1599	1	0.9999997743505576			1599	1	0.9918687133900637		1599	1	0.966855		1599	1	0.9996110442231889		1599	1	0.9995487942019808
1600	1	1		1600	1	0.9999999764318873		1600	1	1		1600	1	0.999837			1600	1	0.9996795082170884		1600	1	0.145629		1600	1	0.06372		1600	1	0.0798788
1601	1	0.9999999999999731		1601	1	0.9999999739846757		1601	1	0.9999999835792378		1601	1	0.9999914295670653			1601	1	0.9995664972131524		1601	1	0.450189		1601	1	0.7023379996033683		1601	1	0.8028138071787352
1602	1	1		1602	1	0.9999999998824695		1602	1	0.9999994474126459		1602	1	0.9999994368538143			1602	1	0.9955990414338718		1602	1	0.583135		1602	1	0.9778067423867757		1602	1	0.9798283899952858
1603	1	1		1603	1	0.9999999999690057		1603	1	0.9999569728018319		1603	1	0.9999999401118943			1603	1	0.9999984981101498		1603	1	0.424339		1603	1	0.6651446185777758		1603	1	0.8345206396408748
1604	1	1		1604	1	0.9999999999956212		1604	1	0.999987		1604	1	1			1604	1	0.9991217708568776		1604	1	0.92761		1604	1	0.9988568904728221		1604	1	0.9749273759096272
1605	1	0.9999999999999993		1605	1	0.9997397376817697		1605	1	0.9990679568318593		1605	1	0.8245317953608082			1605	1	0.999495		1605	1	0.188772		1605	1	0.0912642		1605	1	0.47289108196380725
1606	1	1		1606	1	0.9999999694179597		1606	1	0.9999903076354738		1606	1	0.9999703285035412			1606	1	0.9999580083816914		1606	1	0.896672		1606	1	0.9982893111966136		1606	1	0.4646144690057129
1607	1	1		1607	1	0.9999999999861025		1607	1	0.9999998955148549		1607	1	0.9999995908321243			1607	1	0.9999753964576531		1607	1	0.813793		1607	1	0.9982105593092052		1607	1	0.8087491418883965
1608	1	1		1608	1	0.9999999999965471		1608	1	0.9999998706688464		1608	1	0.9999995780507384			1608	1	0.9996091560232323		1608	1	0.89048		1608	1	0.9987271639164316		1608	1	0.689146
1609	1	1		1609	1	0.9999999999955511		1609	1	0.9999948470817781		1609	1	0.9999991703748226			1609	1	0.9982010848539513		1609	1	0.639676		1609	1	0.995437		1609	1	0.7448941590636461
1610	1	1		1610	1	0.9999999999996281		1610	1	0.9999990135685193		1610	1	0.9999999991590687			1610	1	0.9917091131507416		1610	1	0.969927		1610	1	0.9989882756958042		1610	1	0.9790782629143505
1611	1	1		1611	1	1		1611	1	0.9999991468046457		1611	1	0.999998			1611	1	0.9917384204551414		1611	1	0.894556		1611	1	0.9983193829348347		1611	1	0.8930849757871872
1612	1	1		1612	1	1		1612	1	0.9999634108645014		1612	1	0.9999997005087333			1612	1	0.9999215716495082		1612	1	0.166568		1612	1	0.0985428		1612	1	0.17295182938444378
1613	1	1		1613	1	0.9999999999983771		1613	1	1		1613	1	0.9999841146375636			1613	1	0.9997973909919162		1613	1	0.813856		1613	1	0.9990716242438626		1613	1	0.9937174146937963
1614	1	1		1614	1	0.9999999999727086		1614	1	1		1614	1	0.9999382491641562			1614	1	0.9999862099952577		1614	1	0.653465		1614	1	0.9893931993160118		1614	1	0.44905949752107344
1615	1	1		1615	1	1		1615	1	0.9999996471159452		1615	1	0.9999982047444262			1615	1	0.8008149143886393		1615	1	0.950735		1615	1	0.9933536254626634		1615	1	0.9801068083650535
1616	1	1		1616	1	0.9999999999538519		1616	1	0.9999965469393475		1616	1	0.9999999901687787			1616	1	0.9931657115338963		1616	1	0.936452		1616	1	0.9981904606116027		1616	1	0.9939193590796255
1617	1	1		1617	1	0.9999999999919318		1617	1	0.9999983021798594		1617	1	0.9999997388920628			1617	1	0.9557222124416748		1617	1	0.719811		1617	1	0.9702242420297178		1617	1	0.9634195204464432
1618	1	1		1618	1	0.9999999999980707		1618	1	0.999999		1618	1	0.9999999837648259			1618	1	0.990326		1618	1	0.926819		1618	1	0.976006		1618	1	0.9996162821857264
1619	1	1		1619	1	0.9999999999805289		1619	1	0.9999107018416779		1619	1	1			1619	1	0.994097		1619	1	0.948835		1619	1	0.9938869817857379		1619	1	0.9986884922946603
1620	1	1		1620	1	0.9999999999415152		1620	1	0.9999534026353676		1620	1	1			1620	1	0.9869300520067598		1620	1	0.980411		1620	1	0.9933333963027797		1620	1	0.9985150907527829
1621	1	1		1621	1	0.9999999999959845		1621	1	0.9999976117535485		1621	1	0.9999995577714783			1621	1	0.9943685158859081		1621	1	0.888596		1621	1	0.9686		1621	1	0.9990764292134057
1622	1	1		1622	1	0.9999999999836146		1622	1	0.9999349425943497		1622	1	0.9999999995570477			1622	1	0.9934062276500075		1622	1	0.945449		1622	1	0.9868593193484368		1622	1	0.9990425660571877
1623	1	1		1623	1	0.9999999999997283		1623	1	0.9999906612875038		1623	1	1			1623	1	0.9974752439362706		1623	1	0.939461		1623	1	0.9933458965093097		1623	1	0.9913514245837161
1624	1	1		1624	1	0.9999999999850909		1624	1	0.9999808636764359		1624	1	0.9999999921256905			1624	1	0.9924176456866296		1624	1	0.822797		1624	1	0.8622837784992187		1624	1	0.9986110816553009
1625	1	1		1625	1	0.9999999999958284		1625	1	0.9999849954011797		1625	1	0.9999998621972667			1625	1	0.9971488384677318		1625	1	0.889788		1625	1	0.9925627662216784		1625	1	0.9990107869185028
1626	1	1		1626	1	0.9999999999947651		1626	1	0.9999488647610194		1626	1	0.9999515562539327			1626	1	0.9914313227341403		1626	1	0.440492		1626	1	0.9647190787689056		1626	1	0.5512041097330572
1627	1	1		1627	1	0.9999999999648004		1627	1	0.9999790452621621		1627	1	0.9999999992438577			1627	1	0.9912347015220583		1627	1	0.97467		1627	1	0.9942923763436139		1627	1	0.9989869350043631
1628	1	1		1628	1	0.9999999999990187		1628	1	0.9999941775711801		1628	1	0.9999999947759698			1628	1	0.9604226781550875		1628	1	0.441892		1628	1	0.9314903410502327		1628	1	0.935236
1629	1	1		1629	1	0.9999999999740836		1629	1	0.9999072040608407		1629	1	0.9999999957629154			1629	1	0.7636597511976291		1629	1	0.982715		1629	1	0.9980991857064682		1629	1	0.9997384169742703
1630	1	0.9999999999999993		1630	1	0.9999999999797825		1630	1	0.999984		1630	1	0.9999999612062741			1630	1	0.988078		1630	1	0.872823		1630	1	0.8009305539598544		1630	1	0.9927177588034166
1631	1	1		1631	1	0.9999999997724208		1631	1	0.9999998229381556		1631	1	0.9999774434787153			1631	1	0.7690791253072877		1631	1	0.730764		1631	1	0.9901383760706765		1631	1	0.9968864214790618
1632	1	1		1632	1	0.9999999999945068		1632	1	0.9999944310737282		1632	1	1			1632	1	0.9943525509066274		1632	1	0.973303		1632	1	0.9948275622204871		1632	1	0.9980635129614718
1633	1	1		1633	1	0.9999999999961406		1633	1	0.9999656971891392		1633	1	0.9999999972842033			1633	1	0.8466512877363892		1633	1	0.979483		1633	1	0.9974363332741131		1633	1	0.9997075040850955
1634	1	1		1634	1	1		1634	1	0.9999903317347217		1634	1	0.9999934999527318			1634	1	0.9966964968665031		1634	1	0.90963		1634	1	0.994607		1634	1	0.9937148296933261
1635	1	1		1635	1	0.9999999999965032		1635	1	0.9999986234387321		1635	1	0.9999999977995422			1635	1	0.9959930608032936		1635	1	0.98972		1635	1	0.9863572424442835		1635	1	0.9989847101033755
1636	1	1		1636	1	0.9999999999999992		1636	1	0.9999998706686284		1636	1	0.9999980354452276			1636	1	0.9997509616037517		1636	1	0.927953		1636	1	0.9897531751469418		1636	1	0.9993222934265137
1637	1	1		1637	1	0.9999999999985912		1637	1	0.9999962525569374		1637	1	0.9999999981251071			1637	1	0.971163		1637	1	0.564097		1637	1	0.8514635332845936		1637	1	0.9941064274974236
1638	1	1		1638	1	0.9999999999738423		1638	1	0.999951		1638	1	0.9999999994643115			1638	1	0.9844251025929195		1638	1	0.97769		1638	1	0.9925051487235587		1638	1	0.998454
1639	1	1		1639	1	0.9999999999996668		1639	1	0.9999982676275849		1639	1	0.9999999718392787			1639	1	0.9970289203265233		1639	1	0.963391		1639	1	0.9835557960899926		1639	1	0.9919231254043642
1640	1	1		1640	1	0.9999999999999989		1640	1	0.9999995290360563		1640	1	0.9999998184039033			1640	1	0.9599554584800093		1640	1	0.96161		1640	1	0.993696		1640	1	0.9996789004994436
1641	1	1		1641	1	0.9999999997091419		1641	1	0.9999186414376773		1641	1	0.9999999899129782			1641	1	0.9970907582190642		1641	1	0.984015		1641	1	0.9971876297963648		1641	1	0.9995995599511169
1642	1	1		1642	1	0.9999999500967792		1642	1	0.9998386173359768		1642	1	0.7964145996888442			1642	1	0.8102906098924573		1642	1	0.594468		1642	1	0.7547895079585757		1642	1	0.5156158777688886
1643	1	1		1643	1	0.9999999999997892		1643	1	0.9999999852376739		1643	1	0.9999999972613846			1643	1	0.9999155941429895		1643	1	0.925995		1643	1	0.9960123561239591		1643	1	0.999735
1644	1	1		1644	1	0.9999999999276868		1644	1	0.9999999593983776		1644	1	0.9999999987109411			1644	1	0.8079986028633804		1644	1	0.505904		1644	1	0.7511802685745136		1644	1	0.9931804166112604
1645	1	1		1645	1	0.9999999999999764		1645	1	0.9999999883507553		1645	1	0.9999999754415586			1645	1	0.9999998154073411		1645	1	0.997185		1645	1	0.9997980084483802		1645	1	0.9999911691561044
1646	1	1		1646	1	0.9999999999987138		1646	1	0.9999989956605384		1646	1	0.9999999891492442			1646	1	0.9999999970924373		1646	1	0.99887		1646	1	0.9994717265077285		1646	1	0.999982
1647	1	1		1647	1	0.9999999999997613		1647	1	0.9999999794194678		1647	1	0.9999999368570187			1647	1	0.9999998811796055		1647	1	0.995687		1647	1	0.9974294787932025		1647	1	0.9999334105587668
1648	1	1		1648	1	0.9999975100418066		1648	1	0.9999848894874712		1648	1	0.9506869374507494			1648	1	0.9826650504873528		1648	1	0.490611		1648	1	0.5634626153625418		1648	1	0.6149269580551234
1649	1	1		1649	1	0.9999999984728125		1649	1	0.999999		1649	1	0.9999999476174057			1649	1	0.9999752407732033		1649	1	0.833693		1649	1	0.9961881033920233		1649	1	0.9702905399931108
1650	1	1		1650	1	0.9999999267261145		1650	1	0.9999995810336149		1650	1	0.8858390916521307			1650	1	0.9935249908072357		1650	1	0.471771		1650	1	0.40337137243446475		1650	1	0.7516614957482259
1651	1	1		1651	1	0.9999999999997714		1651	1	0.9999997725325994		1651	1	0.9999999929955729			1651	1	0.9999964355365267		1651	1	0.906121		1651	1	0.9993459471563426		1651	1	0.9993848018607131
1652	1	1		1652	1	0.9999999999999839		1652	1	1		1652	1	0.9999999726523302			1652	1	0.999969		1652	1	0.347818		1652	1	0.49850242531932626		1652	1	0.9932363290160029
1653	1	1		1653	1	0.9999999999944259		1653	1	0.9999998638651006		1653	1	1			1653	1	0.9999999430786014		1653	1	0.997724		1653	1	0.9991784237345599		1653	1	0.9999957670449977
1654	1	1		1654	1	0.9999999999167185		1654	1	0.9999999709478965		1654	1	0.9999999801499745			1654	1	0.9999996298245533		1654	1	0.989764		1654	1	0.9974533768320636		1654	1	0.9999958487148891
1655	1	1		1655	1	1		1655	1	0.9999999852331145		1655	1	0.9999998719435423			1655	1	0.9999998927007456		1655	1	0.984221		1655	1	0.9946211782055882		1655	1	0.9997261354956999
1656	1	1		1656	1	0.9999999999998845		1656	1	0.9999994720311787		1656	1	0.9999999088048818			1656	1	1		1656	1	0.990223		1656	1	0.9984739315786831		1656	1	0.9999965329631189
1657	1	1		1657	1	0.9999999999999934		1657	1	0.9999999994358819		1657	1	1			1657	1	0.9999987176121834		1657	1	0.985376		1657	1	0.9974755970436938		1657	1	0.999409
1658	1	1		1658	1	0.9999999999946646		1658	1	1		1658	1	0.9999999980889515			1658	1	0.9999999202600923		1658	1	0.994785		1658	1	0.9992145460258396		1658	1	0.9999978174515354
1659	1	1		1659	1	0.9999999999996142		1659	1	1		1659	1	1			1659	1	0.9999999472714503		1659	1	0.99779		1659	1	0.9993765269174474		1659	1	0.9999989115507312
1660	1	1		1660	1	0.9999999999824554		1660	1	0.9999999918066561		1660	1	0.9999999884817128			1660	1	0.9999999764317432		1660	1	0.890833		1660	1	0.965026		1660	1	0.9997061420295091
1661	1	1		1661	1	1		1661	1	0.9999999854776864		1661	1	0.9999999940088968			1661	1	0.9999999929508939		1661	1	0.994517		1661	1	0.9986171395793538		1661	1	0.9999962816059211
1662	1	1		1662	1	0.9999999861471058		1662	1	0.9999995412091726		1662	1	0.9999999700037272			1662	1	0.9998001362935423		1662	1	0.160386		1662	1	0.5181615259489312		1662	1	0.401344
1663	1	1		1663	1	0.9999999999999545		1663	1	0.9999999978404182		1663	1	0.9999999626629709			1663	1	0.9999999876485356		1663	1	0.993767		1663	1	0.9988108407518608		1663	1	1
1664	1	1		1664	1	0.9999999999945061		1664	1	1		1664	1	0.9999999834179554			1664	1	0.9999982950645337		1664	1	0.997921		1664	1	0.9995816785009296		1664	1	0.9999962535502394
1665	1	1		1665	1	1		1665	1	0.9999996622198138		1665	1	0.999984			1665	1	0.9999986280109613		1665	1	0.452098		1665	1	0.9047894606275089		1665	1	0.9795672610787327
1666	1	1		1666	1	0.9999999999984275		1666	1	0.9999999993422674		1666	1	0.9999999989064303			1666	1	0.9999944818823481		1666	1	0.811405		1666	1	0.9747506703186127		1666	1	0.9994620494083889
1667	1	0.9999999999999986		1667	1	0.9999999998547964		1667	1	0.9999984945462079		1667	1	0.9999999574884241			1667	1	0.999999		1667	1	0.9313		1667	1	0.9990143121928322		1667	1	0.999968
1668	1	1		1668	1	0.9999999999996815		1668	1	0.9999999239783235		1668	1	0.9999999984681103			1668	1	0.9999951540837327		1668	1	0.983842		1668	1	0.9982007769162469		1668	1	0.9958187962526946
1669	1	1		1669	1	0.9999999999999998		1669	1	0.9999999990112327		1669	1	1			1669	1	0.9999968990362454		1669	1	0.994157		1669	1	0.9984272930364637		1669	1	0.9998645627473631
1670	1	1		1670	1	0.9999999999999788		1670	1	1		1670	1	0.9999999967842016			1670	1	0.9999766500074061		1670	1	0.977367		1670	1	0.9967470554209363		1670	1	0.9969852507311673
1671	1	1		1671	1	0.9999999999998651		1671	1	0.9999999978647954		1671	1	0.9999999953012283			1671	1	0.9999981016467406		1671	1	0.981158		1671	1	0.9950820765990431		1671	1	0.9999934288034439
1672	1	1		1672	1	0.9999999999293062		1672	1	0.999998		1672	1	0.9999999931277326			1672	1	0.9999998151654563		1672	1	0.989462		1672	1	0.9992736813360331		1672	1	0.9997153442686977
1673	1	1		1673	1	0.9999999999998072		1673	1	0.9999998775516844		1673	1	0.9999999680448062			1673	1	0.9999997140441378		1673	1	0.998471		1673	1	0.9997704968981415		1673	1	0.9999907203644344
1674	1	1		1674	1	0.9999999999998366		1674	1	0.9999999943794253		1674	1	0.9999999682068206			1674	1	0.9999996176138709		1674	1	0.997703		1674	1	0.9995305205570708		1674	1	0.9999883352619189
1675	1	1		1675	1	0.9999999999999946		1675	1	1		1675	1	0.9999999951670502			1675	1	0.9999876320680443		1675	1	0.841797		1675	1	0.9917186014505638		1675	1	0.9886172358315968
1676	1	1		1676	1	0.9999999999985817		1676	1	0.9999999920951338		1676	1	0.9999999714198146			1676	1	1		1676	1	0.990869		1676	1	0.9987144561062721		1676	1	0.9999918530112584
1677	1	1		1677	1	0.9999999997130279		1677	1	0.9997239887997013		1677	1	1			1677	1	0.9999774183800243		1677	1	0.482655		1677	1	0.8369782692842819		1677	1	0.996376
1678	1	1		1678	1	0.9999999975873021		1678	1	0.9999999674797649		1678	1	0.9999999816733328			1678	1	0.9999996858101158		1678	1	0.960548		1678	1	0.996795		1678	1	0.9997065810517509
1679	1	1		1679	1	0.9999999999974565		1679	1	0.9999999366107862		1679	1	0.9999999992572649			1679	1	0.9999995619802852		1679	1	0.997077		1679	1	0.9999309638196467		1679	1	0.9996469364394205
1680	1	1		1680	1	0.9999999999997877		1680	1	0.9999999900181386		1680	1	0.9999999810489438			1680	1	1		1680	1	0.981107		1680	1	0.9970271737023936		1680	1	0.999997
1681	1	1		1681	1	0.9999999999999923		1681	1	0.9999999999266621		1681	1	0.9999999853951405			1681	1	0.9999996207865892		1681	1	0.899179		1681	1	0.9755683268391955		1681	1	0.999332
1682	1	1		1682	1	0.9999999999993118		1682	1	0.9999999764158576		1682	1	0.9999999586691939			1682	1	0.9999998793992514		1682	1	0.99634		1682	1	0.9987940593267429		1682	1	0.9999712262242506
1683	1	1		1683	1	0.9999999999782909		1683	1	0.9999999854711794		1683	1	0.9999999942176544			1683	1	0.9999925269931736		1683	1	0.959522		1683	1	0.9995948608695101		1683	1	0.9999927348637121
1684	1	1		1684	1	0.9999999999999764		1684	1	0.9999999883507553		1684	1	0.9999999754415586			1684	1	0.9999998154073411		1684	1	0.997185		1684	1	0.9997980084483802		1684	1	0.9999911691561044
1685	1	1		1685	1	0.9999999999999264		1685	1	0.9999997418893302		1685	1	0.9999999947449373			1685	1	0.9999999613349577		1685	1	0.990537		1685	1	0.9993437286884744		1685	1	0.9999882714969232
1686	1	1		1686	1	1		1686	1	0.9999958981297582		1686	1	0.9999995049876795			1686	1	0.9999998492819869		1686	1	0.985235		1686	1	0.9981847309810051		1686	1	0.9999927772623057
1687	1	1		1687	1	0.9999999999998518		1687	1	0.9999999965969609		1687	1	0.9999999906669657			1687	1	0.9999979392947901		1687	1	0.273712		1687	1	0.4060611841817919		1687	1	0.9038209928164188
1688	1	1		1688	1	0.9999999999478938		1688	1	0.9999999775013273		1688	1	0.9999999859209473			1688	1	0.9999999222611153		1688	1	0.992665		1688	1	0.9999257018399892		1688	1	0.9999965427450698
1689	1	1		1689	1	0.9999999999929071		1689	1	0.9999995388034811		1689	1	0.9999999756876139			1689	1	0.9999975016979462		1689	1	0.264571		1689	1	0.2948751362202575		1689	1	0.9909916010877275
1690	1	1		1690	1	0.9999999939154283		1690	1	0.9999997377845118		1690	1	0.9999998711754466			1690	1	0.9999991387265565		1690	1	0.98841		1690	1	0.9998442698690023		1690	1	0.9996304588103277
1691	1	1		1691	1	0.9999999999997264		1691	1	0.9999999971400197		1691	1	1			1691	1	0.9999991285928466		1691	1	0.99233		1691	1	0.9992429464524163		1691	1	0.9999782930637994
1692	1	1		1692	1	0.9999999999987531		1692	1	0.9999993428001348		1692	1	0.9999999930061234			1692	1	0.9999999119877847		1692	1	0.995849		1692	1	0.9988473823717561		1692	1	0.9999742630960138
1693	1	1		1693	1	0.9999999999997637		1693	1	0.9999998973798294		1693	1	0.9999999979037546			1693	1	0.9999999934013996		1693	1	0.998411		1693	1	0.9994336103962649		1693	1	0.9999909131030249
1694	1	1		1694	1	0.9999999999991274		1694	1	0.9999999682218882		1694	1	0.9999997761943711			1694	1	0.9999921027645075		1694	1	0.935568		1694	1	0.9988637301230024		1694	1	0.9987041805598005
1695	1	0.9999999999999982		1695	1	0.9999999999993467		1695	1	0.9999999952461424		1695	1	0.9999999990267376			1695	1	0.999964		1695	1	0.822912		1695	1	0.9994232020853956		1695	1	0.9994858905654967
1696	1	1		1696	1	0.9999999999839726		1696	1	0.9999998263242746		1696	1	0.9999998266554088			1696	1	0.9999998957855816		1696	1	0.997481		1696	1	0.9990583132374162		1696	1	0.9999541733881158
1697	1	1		1697	1	0.9999999999999071		1697	1	1		1697	1	0.9999999968312487			1697	1	0.9999995124294428		1697	1	0.98854		1697	1	0.9991318211127976		1697	1	0.9995720056062415
1698	1	1		1698	1	1		1698	1	1		1698	1	0.9999999906786337			1698	1	0.9999978533799372		1698	1	0.91127		1698	1	0.9907608926729036		1698	1	0.9998236357058852
1699	1	1		1699	1	0.9999999999978644		1699	1	0.9999999872538023		1699	1	1			1699	1	0.999999		1699	1	0.924346		1699	1	0.9893517351651836		1699	1	0.9998086023781968
1700	1	1		1700	1	0.8245976938334446		1700	1	0.8507493306673345		1700	1	0.5066696847174526			1700	1	0.9877609628259186		1700	1	0.246858		1700	1	0.0847351		1700	1	0.4488906662779546
1701	1	1		1701	1	0.9999983363977955		1701	1	0.9999999467533106		1701	1	0.99996			1701	1	0.9999864526608836		1701	1	0.156952		1701	1	0.9192659301567854		1701	1	0.9711896976724677
1702	1	1		1702	1	0.9999987638247592		1702	1	1		1702	1	0.9999872743411029			1702	1	0.9999953677066825		1702	1	0.268456		1702	1	0.94856		1702	1	0.9672387683592862
1703	1	1		1703	1	0.999999		1703	1	1		1703	1	0.9999999831567256			1703	1	0.9999997685843516		1703	1	0.236786		1703	1	0.7474042530492463		1703	1	0.9995320276195295
1704	1	1		1704	1	0.9999936026750971		1704	1	0.9999997936437423		1704	1	0.9999878294494972			1704	1	0.999919		1704	1	0.392625		1704	1	0.699524		1704	1	0.8627194304100791
1705	1	1		1705	1	0.9997835065337926		1705	1	0.999991		1705	1	0.9990635839898423			1705	1	0.9999990807366758		1705	1	0.219593		1705	1	0.26051083042484113		1705	1	0.3825801789708478
1706	1	1		1706	1	0.9999995848448561		1706	1	0.9999999768532037		1706	1	0.9999987273443373			1706	1	0.9999256362409564		1706	1	0.866247		1706	1	0.9907441531578914		1706	1	0.926539
1707	1	1		1707	1	0.9999999996734075		1707	1	0.9999999999832297		1707	1	0.9999999492700805			1707	1	1		1707	1	0.875405		1707	1	0.9809651044004365		1707	1	0.9964984814967257
1708	1	1		1708	1	1		1708	1	0.9999996739888196		1708	1	0.995209			1708	1	0.96985		1708	1	0.422381		1708	1	0.3844247527905344		1708	1	0.8551936297077293
1709	1	1		1709	1	0.9999999564256997		1709	1	0.9999999532797812		1709	1	0.9816517389798904			1709	1	0.7247480375751538		1709	1	0.153358		1709	1	0.4492158454543662		1709	1	0.9656549013107885
1710	1	1		1710	1	0.9999999796388619		1710	1	0.9999999997431266		1710	1	0.9989413644751551			1710	1	0.9835420239732344		1710	1	0.120461		1710	1	0.8598292288326763		1710	1	0.9749005984039547
1711	1	1		1711	1	0.9999997510173692		1711	1	0.9999970129875357		1711	1	0.9999496391248065			1711	1	0.9786760280388812		1711	1	0.369181		1711	1	0.4189625691366486		1711	1	0.9656972420954119
1712	1	1		1712	1	0.9999998570851693		1712	1	0.999999		1712	1	0.9993373752148977			1712	1	0.9956579201566526		1712	1	0.21958		1712	1	0.63145		1712	1	0.9530596894123328
1713	1	1		1713	1	0.9999765692543533		1713	1	0.9999998274473351		1713	1	0.9997973571141272			1713	1	0.9981381246379092		1713	1	0.161371		1713	1	0.6173303280961177		1713	1	0.9149178999753723
1714	1	1		1714	1	0.9999999999387609		1714	1	0.9999871341038347		1714	1	0.9999987902281683			1714	1	0.9999994371398915		1714	1	0.334736		1714	1	0.570042		1714	1	0.6410589482712276
1715	1	1		1715	1	0.9999999999889947		1715	1	0.9999991511736258		1715	1	0.9999986704367301			1715	1	0.9999995494747724		1715	1	0.775917		1715	1	0.9963645742534888		1715	1	0.8605689013504757
1716	1	1		1716	1	1		1716	1	0.9999999870700569		1716	1	0.9933192041953826			1716	1	0.9999999999648863		1716	1	0.831369		1716	1	0.9150980846150821		1716	1	0.9335913614056784
1717	1	1		1717	1	1		1717	1	0.999888		1717	1	0.9996477145475812			1717	1	0.9999714283143065		1717	1	0.140878		1717	1	0.1069235114424501		1717	1	0.0481152
1718	1	1		1718	1	0.9999999861208203		1718	1	1		1718	1	0.999995			1718	1	0.9890521766014229		1718	1	0.225517		1718	1	0.9302851233886167		1718	1	0.9854565700911639
1719	1	1		1719	1	0.9999762581155156		1719	1	0.9999902862671817		1719	1	0.9998569471041188			1719	1	0.9732893242280375		1719	1	0.222604		1719	1	0.29667673677262707		1719	1	0.4001847204106162
1720	1	1		1720	1	0.9999999999893959		1720	1	0.9999999099886403		1720	1	0.9999812369178321			1720	1	0.9999998597014809		1720	1	0.433679		1720	1	0.9477419793578984		1720	1	0.7870019176309742
1721	1	1		1721	1	0.9999999981438931		1721	1	1		1721	1	0.9995932812819596			1721	1	0.9999999978742355		1721	1	0.228561		1721	1	0.8429797948351396		1721	1	0.9582099155282209
1722	1	1		1722	1	0.9999994690629023		1722	1	0.9999928551602485		1722	1	0.9997865133579814			1722	1	0.9999674726989839		1722	1	0.261897		1722	1	0.16376869666391136		1722	1	0.21516559615463565
1723	1	1		1723	1	0.9999999886154604		1723	1	0.9999987131503051		1723	1	0.9999991465525354			1723	1	0.9955575522711069		1723	1	0.202445		1723	1	0.9243050879767242		1723	1	0.9960613825493668
1724	1	1		1724	1	0.9999999994420392		1724	1	0.9999999046475898		1724	1	0.9993983361355936			1724	1	0.9999009054498572		1724	1	0.427474		1724	1	0.988617		1724	1	0.9966468608503162
1725	1	1		1725	1	0.9999999999403846		1725	1	0.9999999840557988		1725	1	0.9997141792929878			1725	1	0.9999996066549066		1725	1	0.298085		1725	1	0.29666217413658535		1725	1	0.39878979779909657
1726	1	1		1726	1	0.9999999999915111		1726	1	0.9999999978253643		1726	1	0.9997890307751048			1726	1	0.9999995792814614		1726	1	0.927712		1726	1	0.9970482934507439		1726	1	0.9443536225335334
1727	1	1		1727	1	0.9999999999998733		1727	1	0.9999999999094435		1727	1	0.9999971037289337			1727	1	0.9996773590312656		1727	1	0.274475		1727	1	0.9621353352942753		1727	1	0.9977014073177569
1728	1	1		1728	1	0.9999999094126708		1728	1	0.9999999992792089		1728	1	0.9999986753158652			1728	1	0.9842633035665617		1728	1	0.900598		1728	1	0.9929547190931188		1728	1	0.9368732732393253
1729	1	1		1729	1	0.9999999879075032		1729	1	0.9999998819834429		1729	1	1			1729	1	0.9963793188148428		1729	1	0.297438		1729	1	0.964715		1729	1	0.9978169960874981
1730	1	1		1730	1	0.9999999999992966		1730	1	0.9999999459075505		1730	1	0.9999976213473032			1730	1	0.9999872337372933		1730	1	0.219623		1730	1	0.8002384773793358		1730	1	0.985405
1731	1	1		1731	1	0.9999999999491292		1731	1	1		1731	1	0.9999958212156767			1731	1	0.9984367865360535		1731	1	0.247738		1731	1	0.7462613988535091		1731	1	0.4919114777583226
1732	1	1		1732	1	0.9999999999091778		1732	1	0.9999999992036266		1732	1	0.999996			1732	1	0.8832711326810837		1732	1	0.285314		1732	1	0.7442023015689786		1732	1	0.9004970072328642
1733	1	1		1733	1	0.9999999999993417		1733	1	1		1733	1	0.9999987116118413			1733	1	0.9999996670874529		1733	1	0.829626		1733	1	0.9867323226279937		1733	1	0.9969057201908609
1734	1	1		1734	1	0.9999999999990813		1734	1	0.9999999993418225		1734	1	0.9999998750285802			1734	1	1		1734	1	0.850702		1734	1	0.9915660112731671		1734	1	0.9975807574944148
1735	1	1		1735	1	0.9999999999921445		1735	1	0.9999999999958679		1735	1	0.9999990092901629			1735	1	0.9999542936476021		1735	1	0.94898		1735	1	0.9982408266767016		1735	1	0.9837802121316442
1736	1	1		1736	1	1		1736	1	0.9999999999416973		1736	1	0.9999997457130958			1736	1	0.9999655215579659		1736	1	0.528011		1736	1	0.8355538660628101		1736	1	0.923065
1737	1	1		1737	1	0.9999999999784271		1737	1	0.9999999999916239		1737	1	0.9999999958197255			1737	1	0.9989411217545596		1737	1	0.480684		1737	1	0.9405590932788913		1737	1	0.996149
1738	1	1		1738	1	0.9999864812266337		1738	1	0.9999999998103057		1738	1	0.9999999958755844			1738	1	0.9555940248852459		1738	1	0.261761		1738	1	0.9035341048860404		1738	1	0.9953302658405276
1739	1	1		1739	1	0.9999999999249398		1739	1	0.9999999999768615		1739	1	0.9996169331266909			1739	1	0.9999990773994395		1739	1	0.499933		1739	1	0.9928227531121323		1739	1	0.9245190628925963
1740	1	1		1740	1	0.9999999884860609		1740	1	0.9999999999835039		1740	1	0.9999721491100607			1740	1	0.9999933608978838		1740	1	0.213108		1740	1	0.2423118458027963		1740	1	0.4282606343317914
1741	1	1		1741	1	0.9999999999958963		1741	1	0.9999999951498645		1741	1	0.9999990252670927			1741	1	0.9999997038852293		1741	1	0.866218		1741	1	0.9964774179570594		1741	1	0.9986338083429189
1742	1	1		1742	1	0.9999999999995107		1742	1	0.9999999999982655		1742	1	0.9999995658163296			1742	1	0.9999238252965693		1742	1	0.588662		1742	1	0.9837535839065075		1742	1	0.9919163415822068
1743	1	1		1743	1	0.9999999951159886		1743	1	0.9999999999777274		1743	1	0.9999999848330984			1743	1	0.9951747387926225		1743	1	0.834665		1743	1	0.9757738140276067		1743	1	0.9844745905774785
1744	1	1		1744	1	0.9999999999999738		1744	1	0.9999999999988579		1744	1	0.9999999913797051			1744	1	0.9944948343993243		1744	1	0.746577		1744	1	0.964823		1744	1	0.9939136179190986
1745	1	1		1745	1	0.9999999999748748		1745	1	0.9999999999774281		1745	1	0.9999988552865914			1745	1	0.9972697677268049		1745	1	0.556496		1745	1	0.783941		1745	1	0.9468882060795669
1746	1	1		1746	1	0.9999999999998703		1746	1	0.9999999982861444		1746	1	0.9999867425879362			1746	1	0.9999753825034684		1746	1	0.722421		1746	1	0.9975375182596669		1746	1	0.993891
1747	1	1		1747	1	0.9999998335942345		1747	1	0.9999999907534255		1747	1	0.9999999999028387			1747	1	0.9993825444344525		1747	1	0.843393		1747	1	0.9524997488662966		1747	1	0.9977771902579626
1748	1	1		1748	1	0.9999999979891351		1748	1	0.9999999999750407		1748	1	0.9999998251942741			1748	1	0.9984775392345852		1748	1	0.21031		1748	1	0.9497824493929315		1748	1	0.9513506172238817
1749	1	1		1749	1	0.9999999887457778		1749	1	0.9999999998122531		1749	1	0.9999998180032956			1749	1	0.9975175808277131		1749	1	0.930636		1749	1	0.9984919827092946		1749	1	0.9823304863268263
1750	1	1		1750	1	0.9999999998510138		1750	1	0.9999999998785012		1750	1	1			1750	1	0.9965929198837649		1750	1	0.949384		1750	1	0.93425		1750	1	0.9496928796768848
1751	1	1		1751	1	0.9999999999809885		1751	1	0.9999999999791694		1751	1	0.9999999989009821			1751	1	0.9968005652845149		1751	1	0.704758		1751	1	0.9575296433936883		1751	1	0.9804199243925557
1752	1	1		1752	1	0.9999999999742002		1752	1	1		1752	1	0.9999999847303206			1752	1	0.9999979190021824		1752	1	0.873566		1752	1	0.984037		1752	1	0.9982478285447962
1753	1	0.9999999999999982		1753	1	0.9999999930444369		1753	1	0.9999999999697619		1753	1	0.9999874813319825			1753	1	0.9998560483194892		1753	1	0.642291		1753	1	0.3615293258968774		1753	1	0.24126334981340652
1754	1	1		1754	1	1		1754	1	0.9999999999870142		1754	1	0.9999999959952062			1754	1	0.9999822532756959		1754	1	0.452735		1754	1	0.9944189219152282		1754	1	0.9979220538777201
1755	1	1		1755	1	0.9999999999777275		1755	1	0.9999999999796554		1755	1	0.9999909923353854			1755	1	0.9997939692858978		1755	1	0.61776		1755	1	0.44079035989530985		1755	1	0.9391622220552661
1756	1	1		1756	1	0.9999999994417507		1756	1	0.9999999814365216		1756	1	0.9999998761331277			1756	1	0.9968840992927184		1756	1	0.224172		1756	1	0.7110421182336295		1756	1	0.8770700337343694
1757	1	1		1757	1	0.9999999999499601		1757	1	0.9999999999999424		1757	1	1			1757	1	0.9938091759480686		1757	1	0.798089		1757	1	0.9781316884037332		1757	1	0.9968100794233716
1758	1	1		1758	1	0.9999999999996398		1758	1	0.9999999924884535		1758	1	0.9999934441818324			1758	1	0.9995905675282319		1758	1	0.740255		1758	1	0.9673558858403181		1758	1	0.9970309990029635
1759	1	1		1759	1	0.9999999999993805		1759	1	0.9999999999502793		1759	1	0.9999999882049602			1759	1	0.9999838719311458		1759	1	0.303606		1759	1	0.9903320343469868		1759	1	0.9971107606823478
1760	1	1		1760	1	0.9999999984240918		1760	1	0.9999999999986895		1760	1	0.9999999918800567			1760	1	0.9830901216930933		1760	1	0.990929		1760	1	0.9974424226004323		1760	1	0.995585
1761	1	1		1761	1	0.9999999999955427		1761	1	0.9999999986673095		1761	1	0.9999979382956106			1761	1	0.9936856660640543		1761	1	0.921181		1761	1	0.9908832852549531		1761	1	0.9957489044606901
1762	1	1		1762	1	0.9999999999977649		1762	1	0.9999999999574838		1762	1	0.9999999222855066			1762	1	0.999992		1762	1	0.791622		1762	1	0.9858537300392445		1762	1	0.9982065889277778
1763	1	1		1763	1	0.9999999999999758		1763	1	0.9999999999985151		1763	1	1			1763	1	0.9222786637394987		1763	1	0.314726		1763	1	0.9856018118255058		1763	1	0.9973719306901218
1764	1	0.9999999999999089		1764	1	0.9999999997061552		1764	1	0.9999999999945904		1764	1	0.9999999424043539			1764	1	0.9919019652499712		1764	1	0.446607		1764	1	0.991267		1764	1	0.9957815833785744
1765	1	1		1765	1	0.9999999999998221		1765	1	0.9999999999989401		1765	1	0.9999999949963997			1765	1	0.9937557064870151		1765	1	0.678766		1765	1	0.9559086495561521		1765	1	0.9924483952149655
1766	1	1		1766	1	0.9999999999989422		1766	1	0.9999999999914945		1766	1	0.9999999999875722			1766	1	0.9974866394341833		1766	1	0.715709		1766	1	0.9873250865296593		1766	1	0.9954535901840665
1767	1	1		1767	1	0.9999999979603846		1767	1	0.9999999999966013		1767	1	0.9999999979668026			1767	1	0.9899773359004156		1767	1	0.979581		1767	1	0.9683299777013704		1767	1	0.9929937544409968
1768	1	1		1768	1	0.9999999999986746		1768	1	0.9999999875222227		1768	1	0.9999988614695611			1768	1	0.9980362560913212		1768	1	0.878071		1768	1	0.9957437131338176		1768	1	0.9960084631357976
1769	1	1		1769	1	0.9999999999890772		1769	1	0.9999999998407803		1769	1	0.9999999899394458			1769	1	0.9990101974568926		1769	1	0.377505		1769	1	0.6975180676525192		1769	1	0.9421817127088143
1770	1	1		1770	1	0.9999999999768325		1770	1	1		1770	1	0.9999810756746762			1770	1	0.9989187832955433		1770	1	0.978652		1770	1	0.9615842523609239		1770	1	0.9979423541236903
1771	1	1		1771	1	0.9999999999907153		1771	1	0.9999999354776483		1771	1	0.9999994024535012			1771	1	0.9970278419927182		1771	1	0.26151		1771	1	0.9203801915569171		1771	1	0.9963652543095823
1772	1	1		1772	1	0.9999999998333851		1772	1	0.9999999997160435		1772	1	0.9999814563763524			1772	1	0.9781617677308215		1772	1	0.958095		1772	1	0.9954379148284421		1772	1	0.9963289891511855
1773	1	1		1773	1	0.9999999997622352		1773	1	0.9999999994658161		1773	1	0.9999984720425898			1773	1	0.8305560208753509		1773	1	0.369734		1773	1	0.7233126118271934		1773	1	0.8411607111788494
1774	1	1		1774	1	0.9999999986740746		1774	1	0.9999999999999073		1774	1	0.9999999775091446			1774	1	0.9980647842835242		1774	1	0.837166		1774	1	0.9774051731970517		1774	1	0.9944088355627997
1775	1	1		1775	1	0.9999999998304789		1775	1	0.9999999999844597		1775	1	1			1775	1	0.9999561464776938		1775	1	0.275124		1775	1	0.422411		1775	1	0.909405
1776	1	1		1776	1	0.9999999997406005		1776	1	0.9999999668585648		1776	1	0.9999995743047693			1776	1	0.9993652037585679		1776	1	0.86052		1776	1	0.9986020361417018		1776	1	0.9969185621012612
1777	1	1		1777	1	0.9999999999980632		1777	1	0.9999999995425646		1777	1	0.9999916383717162			1777	1	0.9918049663333516		1777	1	0.977752		1777	1	0.9922581407244347		1777	1	0.9965497967129542
1778	1	1		1778	1	0.9999999709022594		1778	1	0.9999999921587575		1778	1	0.9999999586490185			1778	1	0.9975253260432654		1778	1	0.296074		1778	1	0.23646370551384638		1778	1	0.32583234077403816
1779	1	1		1779	1	1		1779	1	1		1779	1	1			1779	1	0.9882217781213707		1779	1	0.96655		1779	1	0.9215636846874556		1779	1	0.9922565426611575
1780	1	1		1780	1	0.9999999999439494		1780	1	0.9999999999240552		1780	1	0.9999999999982628			1780	1	0.9918331236503458		1780	1	0.847638		1780	1	0.9965727288717796		1780	1	0.9975857832454879
1781	1	1		1781	1	0.9999999961678754		1781	1	0.9999999999985365		1781	1	0.9999992745935332			1781	1	0.9998018607974549		1781	1	0.620998		1781	1	0.9899917221538709		1781	1	0.9688700429338785
1782	1	1		1782	1	1		1782	1	0.9999999993451008		1782	1	0.9999999778046105			1782	1	0.9984060682723898		1782	1	0.773068		1782	1	0.9623846090109924		1782	1	0.9680085209718472
1783	1	1		1783	1	0.9999999651256261		1783	1	0.9999999995888251		1783	1	0.9999999995595009			1783	1	0.9993737724872341		1783	1	0.496723		1783	1	0.4305263377396407		1783	1	0.8203630225665108
1784	1	1		1784	1	0.9999999999999618		1784	1	1		1784	1	0.9999999964209041			1784	1	0.9937588222410677		1784	1	0.749171		1784	1	0.9698362028140414		1784	1	0.9937556698723324
1785	1	1		1785	1	1		1785	1	0.9999999975112884		1785	1	0.9999999951296762			1785	1	0.9960000140254806		1785	1	0.193281		1785	1	0.6409370418815207		1785	1	0.6531590800265724
1786	1	1		1786	1	0.9999999995320868		1786	1	0.9999999994549295		1786	1	0.9999999852184076			1786	1	0.9985793832704174		1786	1	0.756953		1786	1	0.9893828344321332		1786	1	0.9905473330042242
1787	1	1		1787	1	1		1787	1	0.9999999999944034		1787	1	0.9999999960615182			1787	1	0.9998186299193056		1787	1	0.626679		1787	1	0.9820443652725608		1787	1	0.9590358999315255
1788	1	1		1788	1	0.9999999998033889		1788	1	0.9999999997919679		1788	1	0.9999999991972817			1788	1	0.9941529804283425		1788	1	0.916106		1788	1	0.8575017555707443		1788	1	0.9339018219096819
1789	1	1		1789	1	0.9999999999998591		1789	1	0.9999999999162823		1789	1	0.9999999963380382			1789	1	0.9999687797084549		1789	1	0.436476		1789	1	0.9916861380178487		1789	1	0.9978160540392809
1790	1	1		1790	1	0.9999999999993295		1790	1	1		1790	1	0.9999999999999529			1790	1	0.9948909505045641		1790	1	0.914		1790	1	0.9960712746591034		1790	1	0.9986260837974354
1791	1	1		1791	1	0.9999999973281057		1791	1	0.9999999984468808		1791	1	0.9999999779860935			1791	1	0.9999178543748819		1791	1	0.37447		1791	1	0.9186360699197542		1791	1	0.8621672350708692
1792	1	1		1792	1	1		1792	1	0.9999999996725306		1792	1	0.9999998444979739			1792	1	0.9964966706309699		1792	1	0.656318		1792	1	0.9415305562376663		1792	1	0.9778675815694925
1793	1	1		1793	1	0.9999999999958625		1793	1	0.9999999999338451		1793	1	0.9999999586987959			1793	1	0.9999924105185498		1793	1	0.726283		1793	1	0.9907988690253228		1793	1	0.9983015919695473
1794	1	1		1794	1	0.9999999996068234		1794	1	0.9999999999966914		1794	1	0.9999999999230861			1794	1	0.9992432653644986		1794	1	0.408958		1794	1	0.8150521054571909		1794	1	0.9980697741929726
1795	1	1		1795	1	0.9999999999976775		1795	1	0.9999999999969242		1795	1	0.9999999999785711			1795	1	0.9841050388077376		1795	1	0.683498		1795	1	0.9913590711411682		1795	1	0.9977190117334586
1796	1	1		1796	1	0.9999999999783674		1796	1	0.9999999999034925		1796	1	0.9999972661986615			1796	1	0.9792223836911466		1796	1	0.357813		1796	1	0.4982344996317405		1796	1	0.939435
1797	1	1		1797	1	0.9999999999467394		1797	1	0.9999999999977005		1797	1	0.9999997862901359			1797	1	0.9937484911745296		1797	1	0.987995		1797	1	0.9957065201656006		1797	1	0.9985765478448291
1798	1	1		1798	1	0.9999999999792161		1798	1	0.9999999998261863		1798	1	0.9999999749576833			1798	1	0.997121		1798	1	0.798773		1798	1	0.9860467816856499		1798	1	0.9516792868310359
1799	1	1		1799	1	0.9999999999903351		1799	1	0.9999999999022432		1799	1	0.9999999998282956			1799	1	0.8736491239006272		1799	1	0.548628		1799	1	0.9397352102230566		1799	1	0.9962625043897341
1800	1	1		1800	1	0.9999999665612298		1800	1	0.9999999678459965		1800	1	0.9997449565412815			1800	1	0.9999998108210083		1800	1	0.916542		1800	1	0.8920317608669817		1800	1	0.5040909876692005
1801	1	1		1801	1	0.9999999995449856		1801	1	0.9999999962300314		1801	1	1			1801	1	0.9999995822335614		1801	1	0.958938		1801	1	0.7126483458322449		1801	1	0.8768858845407721
1802	1	1		1802	1	1		1802	1	0.999999		1802	1	0.9999996520724156			1802	1	0.9999426383173889		1802	1	0.0923966		1802	1	0.0569192		1802	1	0.055775069579591156
1803	1	1		1803	1	0.9937263078663481		1803	1	0.9998637284606973		1803	1	0.9963462632614045			1803	1	0.9999978726914296		1803	1	0.361739		1803	1	0.25953210280111394		1803	1	0.3377382966078035
1804	1	1		1804	1	0.9999923263352803		1804	1	0.9999998798913458		1804	1	0.9995953352373912			1804	1	0.9999997532653104		1804	1	0.952469		1804	1	0.9436333691840245		1804	1	0.6958038464417512
1805	1	1		1805	1	0.9999999981181813		1805	1	1		1805	1	0.9999985606721062			1805	1	0.999579		1805	1	0.276433		1805	1	0.25818255443678184		1805	1	0.8757736456288114
1806	1	0.9999999999812245		1806	1	0.9999972878705738		1806	1	0.9999152653950898		1806	1	0.999992			1806	1	0.9999999898656565		1806	1	0.763359		1806	1	0.9927581885648484		1806	1	0.8424864227050658
1807	1	0.9999999999781206		1807	1	0.9999998055237084		1807	1	0.9999629203252673		1807	1	0.9999836009992675			1807	1	0.9997999739517105		1807	1	0.211667		1807	1	0.260173		1807	1	0.8258558142922594
1808	1	1		1808	1	0.9999993477339113		1808	1	0.9999861549347927		1808	1	0.9998628794560313			1808	1	0.955182		1808	1	0.00573099		1808	1	0.14566852665281768		1808	1	0.5794072203021159
1809	1	1		1809	1	0.9999999999939424		1809	1	0.9999999986018785		1809	1	0.9999999988274618			1809	1	0.9994056416838408		1809	1	0.614725		1809	1	0.9436897814758362		1809	1	0.9897340105514276
1810	1	0.9999999995371288		1810	1	0.9998887913600414		1810	1	0.9999711737212496		1810	1	0.9975485659738011			1810	1	0.6382059650328304		1810	1	0.106542		1810	1	0.35610502287505147		1810	1	0.4280020470732307
1811	1	1		1811	1	0.9999999477591822		1811	1	0.9999972344865015		1811	1	0.9999999810856394			1811	1	0.9996709048656375		1811	1	0.523701		1811	1	0.8927948555047465		1811	1	0.9529719101609284
1812	1	0.9999999999911974		1812	1	0.9973802502626725		1812	1	0.9997867972853935		1812	1	0.9996207906857775			1812	1	0.9997163808521482		1812	1	0.223457		1812	1	0.7719788997018844		1812	1	0.9549170144376105
1813	1	1		1813	1	0.9999954565442967		1813	1	0.9995812814099686		1813	1	0.9999961249521903			1813	1	0.9316468727993222		1813	1	0.231644		1813	1	0.8605826081435162		1813	1	0.9128009543410066
1814	1	1		1814	1	1		1814	1	0.9999999999944473		1814	1	0.9999998287923696			1814	1	0.9999894308743914		1814	1	0.967475		1814	1	0.9953179680669594		1814	1	0.8967580830917992
1815	1	1		1815	1	0.9999999999999951		1815	1	0.9999999998266371		1815	1	0.9999999920754733			1815	1	0.9999671543706523		1815	1	0.897641		1815	1	0.9932118298812437		1815	1	0.9968462345301915
1816	1	1		1816	1	0.9999999999999998		1816	1	1		1816	1	0.9999999993499488			1816	1	0.9999950844274573		1816	1	0.980863		1816	1	0.9915534494809592		1816	1	0.9892810956040815
1817	1	1		1817	1	1		1817	1	0.9999999999870265		1817	1	0.9999999599627561			1817	1	0.9999280764154822		1817	1	0.671619		1817	1	0.9718595461080238		1817	1	0.9970187159238193
1818	1	1		1818	1	1		1818	1	0.9999999999924872		1818	1	0.9999999979679676			1818	1	0.9999882186136535		1818	1	0.802803		1818	1	0.9535198839919299		1818	1	0.9848360587016008
1819	1	1		1819	1	1		1819	1	0.9999999999983352		1819	1	0.9999999999290965			1819	1	0.9999824861725538		1819	1	0.943838		1819	1	0.9920158995330556		1819	1	0.9873308333374377
1820	1	1		1820	1	0.9999999999999185		1820	1	1		1820	1	0.9999999614477653			1820	1	0.9999875079373892		1820	1	0.743356		1820	1	0.991252		1820	1	0.9222887000784716
1821	1	1		1821	1	1		1821	1	0.9999999998977027		1821	1	0.9999999758044501			1821	1	0.9999989005780433		1821	1	0.994403		1821	1	0.9967677987753528		1821	1	0.9969722195743671
1822	1	1		1822	1	1		1822	1	0.9999997522809508		1822	1	0.9997747554149192			1822	1	0.9994577918690323		1822	1	0.778181		1822	1	0.7788815084546222		1822	1	0.7317127657179685
1823	1	1		1823	1	1		1823	1	0.9999999984383849		1823	1	0.9997163488763219			1823	1	0.9925427609878918		1823	1	0.640241		1823	1	0.932222		1823	1	0.9215419596036611
1824	1	1		1824	1	0.6943820170342465		1824	1	0.9891526170570825		1824	1	0.5668703797342731			1824	1	0.8337227409262923		1824	1	0.188009		1824	1	0.2232086319373302		1824	1	0.42525291915581864
1825	1	1		1825	1	0.9999999952596952		1825	1	0.9999999243813849		1825	1	0.999787			1825	1	0.9942149330769071		1825	1	0.426206		1825	1	0.5107465299123696		1825	1	0.8686745092460756
1826	1	1		1826	1	0.9999999950933105		1826	1	0.9999996819538759		1826	1	0.999647			1826	1	0.9980241537718327		1826	1	0.226366		1826	1	0.4506183476001221		1826	1	0.4278708843185114
1827	1	1		1827	1	0.9999999467557507		1827	1	0.999999		1827	1	0.9997579608541799			1827	1	0.9954154779643551		1827	1	0.589652		1827	1	0.9051335983211963		1827	1	0.9275775245321598
1828	1	1		1828	1	0.9999999993118098		1828	1	0.9999999738395668		1828	1	0.9858160084942778			1828	1	0.9965656782525832		1828	1	0.441717		1828	1	0.6430759017722337		1828	1	0.7078105305502463
1829	1	1		1829	1	0.9999999958322742		1829	1	0.9999999680944409		1829	1	0.9994988175030802			1829	1	0.9967824809024916		1829	1	0.653032		1829	1	0.9772871402572181		1829	1	0.7594220238110435
1830	1	1		1830	1	0.9999999974122484		1830	1	0.9999976155091579		1830	1	0.9997358315613749			1830	1	0.9992178416735821		1830	1	0.914919		1830	1	0.9931592842739407		1830	1	0.8123460152074417
1831	1	1		1831	1	0.9999999999777561		1831	1	0.9999999950463871		1831	1	0.9985732603555101			1831	1	0.9980907692728155		1831	1	0.360468		1831	1	0.20232119760979897		1831	1	0.14923422010144335
1832	1	1		1832	1	0.9999999999803955		1832	1	1		1832	1	0.9998868145885508			1832	1	0.9986190955482984		1832	1	0.177506		1832	1	0.20367177003711295		1832	1	0.48042451461411967
1833	1	0.9999999736853109		1833	1	0.9512365784650703		1833	1	0.9997448757239459		1833	1	0.9936363144447514			1833	1	0.969427		1833	1	0.66568		1833	1	0.4784136520726161		1833	1	0.2564924550916704
1834	1	1		1834	1	0.9999999841315264		1834	1	0.9999992539614805		1834	1	0.9998482210365577			1834	1	0.9947163626261554		1834	1	0.653229		1834	1	0.9078002084778691		1834	1	0.8997506648060365
1835	1	1		1835	1	0.9999999999988288		1835	1	0.9999999999136561		1835	1	0.9999998881440202			1835	1	0.9990233988275924		1835	1	0.492602		1835	1	0.9797958117946787		1835	1	0.5831100366404739
1836	1	1		1836	1	0.9999999999948872		1836	1	0.9999999996031042		1836	1	0.9999999860878281			1836	1	0.9997392299328824		1836	1	0.658278		1836	1	0.6646216154958265		1836	1	0.8419388355873417
1837	1	1		1837	1	0.9999999999923388		1837	1	0.9999999992695342		1837	1	0.9999999286445627			1837	1	0.9996470759981754		1837	1	0.224361		1837	1	0.6830679360612619		1837	1	0.7225799210870307
1838	1	1		1838	1	0.9999999995536293		1838	1	0.9999999997984836		1838	1	0.9999998428403216			1838	1	0.982318		1838	1	0.889035		1838	1	0.9958143108417975		1838	1	0.9035008500863139
1839	1	1		1839	1	0.9999999999506111		1839	1	1		1839	1	0.9999997611406214			1839	1	0.986083		1839	1	0.910912		1839	1	0.9971873363903113		1839	1	0.9343744610686238
1840	1	1		1840	1	0.9999999997284539		1840	1	0.9999999999954093		1840	1	0.9999997921584808			1840	1	0.999833		1840	1	0.245713		1840	1	0.48586009803115765		1840	1	0.5831038270174067
1841	1	1		1841	1	0.9999999986667539		1841	1	0.9999999999998075		1841	1	0.9999742442930005			1841	1	0.9795267542404197		1841	1	0.397503		1841	1	0.2646049611185562		1841	1	0.16264659059841538
1842	1	1		1842	1	1		1842	1	0.9999999999929636		1842	1	0.9999999972338418			1842	1	0.9999994597328179		1842	1	0.69194		1842	1	0.7495647933314866		1842	1	0.6241478030692339
1843	1	1		1843	1	0.9999999996364768		1843	1	0.9999999999947384		1843	1	0.9999998939680416			1843	1	0.9999551122850581		1843	1	0.356417		1843	1	0.5344856875764235		1843	1	0.697111
1844	1	1		1844	1	0.9999999443486407		1844	1	0.9999999999666705		1844	1	0.9999999489242959			1844	1	0.9999987367868458		1844	1	0.36509		1844	1	0.46547841027799775		1844	1	0.6358122069212593
1845	1	1		1845	1	0.9999999999021366		1845	1	0.9999999999988848		1845	1	0.9999997346677071			1845	1	0.9999925026710709		1845	1	0.310418		1845	1	0.8930671027348521		1845	1	0.5973824207330034
1846	1	1		1846	1	0.9999999999631102		1846	1	0.9999999997060725		1846	1	0.9999999982277067			1846	1	0.9999976614158929		1846	1	0.987081		1846	1	0.9951267363369272		1846	1	0.9794909569123165
1847	1	1		1847	1	0.9999999999888407		1847	1	0.9999999996674427		1847	1	0.9999999528168576			1847	1	0.9999999314002395		1847	1	0.0817126		1847	1	0.29827876522081237		1847	1	0.16311612516317525
1848	1	1		1848	1	0.9999999987584027		1848	1	0.9999999996727339		1848	1	0.9999999012483606			1848	1	0.9999697383816748		1848	1	0.909224		1848	1	0.779481		1848	1	0.8532286319955428
1849	1	1		1849	1	0.9999999999956426		1849	1	0.9999999976070574		1849	1	0.9999999976366903			1849	1	0.9699537196288144		1849	1	0.721004		1849	1	0.992473		1849	1	0.9835700068656847
1850	1	1		1850	1	1		1850	1	0.9999999999767021		1850	1	0.9999992016448453			1850	1	0.9999372820108722		1850	1	0.317652		1850	1	0.24221423622979718		1850	1	0.8221853502347566
1851	1	1		1851	1	0.9999999999997717		1851	1	1		1851	1	1			1851	1	0.9964416708068216		1851	1	0.600044		1851	1	0.9076271871297189		1851	1	0.5340600687973323
1852	1	1		1852	1	0.9999999996549207		1852	1	0.9999999977971062		1852	1	0.9999999439024417			1852	1	0.9999807413756343		1852	1	0.182513		1852	1	0.3651425865306767		1852	1	0.5271964829987842
1853	1	1		1853	1	0.9999999999983175		1853	1	0.9999999998452714		1853	1	0.9999997244103634			1853	1	0.9950099513301667		1853	1	0.936519		1853	1	0.9995308621452886		1853	1	0.9637488196405591
1854	1	1		1854	1	0.9999999999326299		1854	1	0.9999999992727456		1854	1	1			1854	1	0.9963827676428993		1854	1	0.310814		1854	1	0.7776508037507536		1854	1	0.8384366317648226
1855	1	1		1855	1	0.9999999999989168		1855	1	0.9999999993372494		1855	1	0.9999995256620215			1855	1	0.9975262754563541		1855	1	0.90498		1855	1	0.9995708369490105		1855	1	0.9335243710880394
1856	1	1		1856	1	0.9999999999942548		1856	1	0.9999999999784247		1856	1	0.9999997163955803			1856	1	0.9999707632376156		1856	1	0.307544		1856	1	0.7374945893863849		1856	1	0.6639798104394161
1857	1	1		1857	1	0.9999999999921027		1857	1	0.9999999999995929		1857	1	0.9999998246483058			1857	1	0.9999990596841104		1857	1	0.853458		1857	1	0.98784		1857	1	0.6562825229224953
1858	1	1		1858	1	0.9999999999940661		1858	1	0.9999999999992792		1858	1	0.9999999556822191			1858	1	0.9931387610180024		1858	1	0.899562		1858	1	0.994092		1858	1	0.9437402826819986
1859	1	1		1859	1	0.9999999999392479		1859	1	0.9999991016223886		1859	1	0.9999999999919446			1859	1	0.9987013926181274		1859	1	0.341952		1859	1	0.32127139173443725		1859	1	0.8730742023576537
1860	1	1		1860	1	0.9999999999998997		1860	1	0.9999999959774765		1860	1	0.9999999989596163			1860	1	0.9999664571877617		1860	1	0.743176		1860	1	0.9197238874367394		1860	1	0.9486901908046389
1861	1	1		1861	1	0.999995		1861	1	0.9999987961430041		1861	1	0.9999992681229556			1861	1	0.9856875142808368		1861	1	0.48981		1861	1	0.8129448451818813		1861	1	0.9885552537207114
1862	1	1		1862	1	0.9999999999994467		1862	1	1		1862	1	0.9999999756583889			1862	1	0.9999184078592463		1862	1	0.989156		1862	1	0.9995702168515064		1862	1	0.9983182390785684
1863	1	1		1863	1	0.9999999999999095		1863	1	0.9999998881833726		1863	1	0.9999997552184932			1863	1	0.9999848926518072		1863	1	0.998255		1863	1	0.9998442740484571		1863	1	0.9980410870237386
1864	1	1		1864	1	0.9999999999773878		1864	1	0.9999999999039553		1864	1	0.9999999919218928			1864	1	0.9972869773520429		1864	1	0.989408		1864	1	0.9997377039149544		1864	1	0.9987799917826993
1865	1	1		1865	1	0.9999999999971926		1865	1	0.9999999921353996		1865	1	0.9999999997763624			1865	1	0.9997242883304212		1865	1	0.996592		1865	1	0.9998887850846568		1865	1	0.9992730626759205
1866	1	1		1866	1	0.9999999999995548		1866	1	0.9999999977575639		1866	1	1			1866	1	0.9999899392625468		1866	1	0.994028		1866	1	0.999602		1866	1	0.9996983804634051
1867	1	1		1867	1	1		1867	1	0.9999999999840185		1867	1	0.9999999998870535			1867	1	0.9998669718938549		1867	1	0.929473		1867	1	0.9703164114232907		1867	1	0.9980081351801132
1868	1	1		1868	1	0.9999999999999041		1868	1	0.9999999931252828		1868	1	0.9999992976467783			1868	1	0.9999459399441025		1868	1	0.484725		1868	1	0.8690524361669609		1868	1	0.8566284155658291
1869	1	1		1869	1	0.9999999999960666		1869	1	1		1869	1	0.9999999990595977			1869	1	0.9999980980795299		1869	1	0.987834		1869	1	0.9983480669992908		1869	1	0.9996462218541206
1870	1	1		1870	1	0.9999999999969977		1870	1	0.9999999801527232		1870	1	0.9999999971152741			1870	1	0.9918567444126086		1870	1	0.333866		1870	1	0.5781565690380909		1870	1	0.3717092274561633
1871	1	0.9999999999999993		1871	1	0.9999999995744157		1871	1	0.9999999438986714		1871	1	0.9997619124424112			1871	1	0.9999682531333689		1871	1	0.935643		1871	1	0.9954294302038427		1871	1	0.9989981650857377
1872	1	1		1872	1	1		1872	1	0.9999999501049909		1872	1	0.9999999642677861			1872	1	0.909571		1872	1	0.859656		1872	1	0.9688462304274846		1872	1	0.9531646747873319
1873	1	1		1873	1	0.9999999999897798		1873	1	0.9999999999696461		1873	1	0.9999999953824565			1873	1	0.9997291845384557		1873	1	0.990411		1873	1	0.9995877930597187		1873	1	0.9998200437666513
1874	1	1		1874	1	0.9999999999999972		1874	1	0.9999999998376472		1874	1	0.9999999998250687			1874	1	0.9999851894618218		1874	1	0.776871		1874	1	0.9767439301257979		1874	1	0.9890926597343588
1875	1	1		1875	1	0.9999999999999918		1875	1	0.9999999988144711		1875	1	0.9999980201805203			1875	1	0.9999612507292822		1875	1	0.991112		1875	1	0.9995765107309275		1875	1	0.9770589167668675
1876	1	1		1876	1	0.9999999999358501		1876	1	0.9999994465853923		1876	1	0.9999999998606038			1876	1	0.9999587750648737		1876	1	0.990829		1876	1	0.9996206263465571		1876	1	0.9972296940519615
1877	1	1		1877	1	0.9999999999995158		1877	1	0.9999999992854274		1877	1	0.9999999987702943			1877	1	0.9997449382403907		1877	1	0.997156		1877	1	0.9997552719183038		1877	1	0.9995408326396847
1878	1	1		1878	1	0.9999999999999681		1878	1	0.9999999895154281		1878	1	0.9999999970256691			1878	1	0.9998487355016533		1878	1	0.549695		1878	1	0.9272224085290091		1878	1	0.9943030291373677
1879	1	1		1879	1	1		1879	1	0.9999999070978048		1879	1	0.9999999989123283			1879	1	0.9999916966703866		1879	1	0.213562		1879	1	0.11485859638660956		1879	1	0.8695106630204125
1880	1	1		1880	1	0.9999999999991767		1880	1	1		1880	1	0.9999999986537447			1880	1	0.9998396995306126		1880	1	0.840088		1880	1	0.9941817093664724		1880	1	0.9470616930500579
1881	1	0.9999999999994365		1881	1	0.9999999409012774		1881	1	0.9999999112833914		1881	1	0.9999956824343014			1881	1	0.9999996973733244		1881	1	0.914695		1881	1	0.9962518826806841		1881	1	0.9944014070967189
1882	1	0.9999999999999979		1882	1	0.9999999979578728		1882	1	0.9999993726472657		1882	1	0.9999666378709787			1882	1	0.9999995812808989		1882	1	0.965526		1882	1	0.9792461456616298		1882	1	0.9818389232730989
1883	1	1		1883	1	0.9999999999982461		1883	1	0.9999999999736338		1883	1	0.9999999937995444			1883	1	0.9987352895947413		1883	1	0.992615		1883	1	0.9995674176634577		1883	1	0.9996054119781236
1884	1	1		1884	1	1		1884	1	0.9999999999870265		1884	1	0.9999999599627561			1884	1	0.9999280764154822		1884	1	0.671619		1884	1	0.9718595461080238		1884	1	0.9970187159238193
1885	1	1		1885	1	0.9999999999878305		1885	1	0.9999998341084866		1885	1	0.9999999978017082			1885	1	0.9999956102776407		1885	1	0.953713		1885	1	0.9976855220912733		1885	1	0.9618610826933612
1886	1	1		1886	1	0.9999999998701574		1886	1	0.9999999998677489		1886	1	0.9999999965863344			1886	1	0.999023		1886	1	0.976306		1886	1	0.9995215745873758		1886	1	0.9973904310522703
1887	1	1		1887	1	1		1887	1	0.9999999875274647		1887	1	0.9999999998770721			1887	1	0.9994576012080796		1887	1	0.478736		1887	1	0.7436601427249793		1887	1	0.9480907589103702
1888	1	1		1888	1	0.9999999999991775		1888	1	0.9999993799576206		1888	1	0.9999998588115047			1888	1	0.9998090682547125		1888	1	0.188816		1888	1	0.20882705177636193		1888	1	0.7565891060381098
1889	1	0.9999999999999749		1889	1	0.9999999899602195		1889	1	0.999995		1889	1	0.9999911929181532			1889	1	0.9999700052266384		1889	1	0.295628		1889	1	0.2607594861100445		1889	1	0.8034390763923808
1890	1	0.9999999999999818		1890	1	0.999999		1890	1	0.9999993862316613		1890	1	0.9999975573754362			1890	1	0.9994925187269978		1890	1	0.823165		1890	1	0.9448706630493947		1890	1	0.9994542445700036
1891	1	1		1891	1	0.9999999999992263		1891	1	0.9999999999716846		1891	1	0.9999999925656657			1891	1	0.9987986024407308		1891	1	0.988662		1891	1	0.9996906679803617		1891	1	0.999538
1892	1	1		1892	1	0.9999999999999998		1892	1	0.9999996576194288		1892	1	0.9999999957783782			1892	1	0.9994535071534741		1892	1	0.994908		1892	1	0.999218		1892	1	0.9734937650660862
1893	1	1		1893	1	0.9999999999994995		1893	1	0.9999999979601408		1893	1	0.9999999941020413			1893	1	0.9999985534802903		1893	1	0.989569		1893	1	0.9986984698598496		1893	1	0.9993650575240779
1894	1	1		1894	1	0.9999999999988637		1894	1	0.9999996719591256		1894	1	0.9999999528114607			1894	1	0.9980842624112036		1894	1	0.335439		1894	1	0.543702		1894	1	0.5217991465695389
1895	1	0.9999999994246251		1895	1	0.9999822178531635		1895	1	0.9999826187142089		1895	1	0.9999987834571463			1895	1	0.9989011416106526		1895	1	0.790868		1895	1	0.9933330274942187		1895	1	0.9933372964322302
1896	1	1		1896	1	1		1896	1	0.9999999999963921		1896	1	0.9999999998257673			1896	1	0.9999890123795867		1896	1	0.916794		1896	1	0.9893598217757258		1896	1	0.9919374894317009
1897	1	1		1897	1	0.9999999999998703		1897	1	0.9999999989130316		1897	1	0.9999999958994259			1897	1	0.9999907855207941		1897	1	0.884332		1897	1	0.992997		1897	1	0.8758347298818118
1898	1	1		1898	1	0.9999999999931807		1898	1	0.9999999717904862		1898	1	0.9999999910365368			1898	1	0.9999425477946533		1898	1	0.905414		1898	1	0.9852098458627573		1898	1	0.9198813009604423
1899	1	1		1899	1	1		1899	1	0.9999999998022988		1899	1	0.9999999999828495			1899	1	0.983317		1899	1	0.318773		1899	1	0.4143210531589377		1899	1	0.715822
1900	1	0.9916985624019302		1900	1	0.5340437084132269		1900	1	0.4253802880145943		1900	1	0.6348372524442998			1900	1	0.9892984070783312		1900	1	0.570273		1900	1	0.5628575672150433		1900	1	0.6596774230160192
1901	1	0.9999999999064346		1901	1	0.9999297644818548		1901	1	0.5082761259060558		1901	1	0.5190413762292223			1901	1	0.9999996188621432		1901	1	0.898879		1901	1	0.7443254402024075		1901	1	0.6581002869352883
1902	1	1		1902	1	0.9999999029712036		1902	1	0.9999997993805155		1902	1	0.9999999647404568			1902	1	0.9910818369946324		1902	1	0.797618		1902	1	0.9885620068240463		1902	1	0.9844011655881294
1903	1	0.9999999999999976		1903	1	0.9999996957896239		1903	1	0.9999999694214465		1903	1	0.9999998234558127			1903	1	0.9755060810576539		1903	1	0.889085		1903	1	0.9846126885252278		1903	1	0.9869465930326305
1904	1	1		1904	1	1		1904	1	1		1904	1	0.9999991603447017			1904	1	0.9999869489709814		1904	1	0.287031		1904	1	0.9321741480808436		1904	1	0.7799181168719054
1905	1	1		1905	1	0.9999999996961625		1905	1	0.9999999660213873		1905	1	0.9999973519652355			1905	1	0.9992007268210263		1905	1	0.454768		1905	1	0.5767822206259176		1905	1	0.7687269221897775
1906	1	1		1906	1	0.999967		1906	1	0.9999989398041199		1906	1	0.9997281444622631			1906	1	0.9999943859963611		1906	1	0.489808		1906	1	0.9725899874882039		1906	1	0.8244812962941317
1907	1	1		1907	1	0.9999999999947787		1907	1	0.9999999993078069		1907	1	0.9999995731086412			1907	1	0.9999777398706339		1907	1	0.785666		1907	1	0.6792473186669691		1907	1	0.9929014472735773
1908	1	1		1908	1	0.9999999999987721		1908	1	1		1908	1	0.9999997243375858			1908	1	0.9999988641800366		1908	1	0.925638		1908	1	0.9876130015311569		1908	1	0.9995214725773561
1909	1	0.9999999999999993		1909	1	1		1909	1	0.9999192173854968		1909	1	0.9999289339722097			1909	1	0.9924647525248165		1909	1	0.958721		1909	1	0.9692635204290068		1909	1	0.9939385116706766
1910	1	0.9883813286093431		1910	1	0.7384267681846737		1910	1	0.5854401948762216		1910	1	0.9839234527057411			1910	1	0.9676693709594948		1910	1	0.489155		1910	1	0.9115514345525461		1910	1	0.9065448571207233
1911	1	1		1911	1	0.9999999997346065		1911	1	0.9999999387496666		1911	1	0.9999997149112366			1911	1	0.9979891650589721		1911	1	0.946445		1911	1	0.7336192659319494		1911	1	0.9898146226491862
1912	1	1		1912	1	0.9999999981913594		1912	1	0.9999756122079454		1912	1	0.9998936577435412			1912	1	0.9998607286364519		1912	1	0.977511		1912	1	0.9119550381319115		1912	1	0.9973680210418125
1913	1	1		1913	1	0.9999999999982861		1913	1	0.9999999553408594		1913	1	0.9999999869856776			1913	1	0.9908673423233659		1913	1	0.760251		1913	1	0.9989674122325459		1913	1	0.9997572434534476
1914	1	1		1914	1	0.9999999989393707		1914	1	0.9999999751953439		1914	1	0.9999999949004633			1914	1	0.9999974728237544		1914	1	0.663678		1914	1	0.7708512288619921		1914	1	0.9975584442170314
1915	1	1		1915	1	0.9999999997652824		1915	1	0.9999999992656367		1915	1	0.9999999966012519			1915	1	0.9999911066761553		1915	1	0.296614		1915	1	0.8942019629679495		1915	1	0.9992229056544674
1916	1	1		1916	1	0.9999998730475516		1916	1	0.9999999390041484		1916	1	0.9999999998932427			1916	1	0.9999815570778972		1916	1	0.231966		1916	1	0.5506674518071393		1916	1	0.9922549875928031
1917	1	0.9999999999999912		1917	1	0.9999999999802454		1917	1	0.9999999729974856		1917	1	1			1917	1	0.999915		1917	1	0.721604		1917	1	0.8335769088234607		1917	1	0.9987334840002853
1918	1	1		1918	1	0.9999997403682468		1918	1	0.9999998011970653		1918	1	0.9999999586271175			1918	1	0.9999996609898778		1918	1	0.476746		1918	1	0.47187775579258506		1918	1	0.9054775257379628
1919	1	1		1919	1	1		1919	1	1		1919	1	0.9999965537194515			1919	1	0.9988482546935313		1919	1	0.632112		1919	1	0.9514907420226588		1919	1	0.9965958582036182
1920	1	1		1920	1	0.9999998435711184		1920	1	0.9999999746681443		1920	1	0.9999809659607288			1920	1	0.999328		1920	1	0.728972		1920	1	0.9983677267534972		1920	1	0.9889079080598497
1921	1	0.9999999999999997		1921	1	0.99984		1921	1	0.9999986162732899		1921	1	0.9999564115648354			1921	1	0.996172		1921	1	0.0966607		1921	1	0.5569263582174417		1921	1	0.8572605929378437
1922	1	1		1922	1	0.9999998390077823		1922	1	0.9999999782372347		1922	1	0.9999880520604582			1922	1	0.9988929747665461		1922	1	0.851452		1922	1	0.9991327745968817		1922	1	0.9867533397469341
1923	1	1		1923	1	0.9999983645711334		1923	1	0.9999875965173322		1923	1	0.858819			1923	1	0.9999998778639263		1923	1	0.52225		1923	1	0.5099327999830415		1923	1	0.9188286627551947
1924	1	1		1924	1	0.9999998876332408		1924	1	0.9999972232723036		1924	1	0.999284			1924	1	0.9972835585034816		1924	1	0.158475		1924	1	0.14960235160520333		1924	1	0.23133299462747925
1925	1	1		1925	1	0.9999999999999009		1925	1	1		1925	1	0.9999999999488093			1925	1	0.9999999482747434		1925	1	0.269369		1925	1	0.9631360567191658		1925	1	0.9887323615340656
1926	1	1		1926	1	0.9999999999740776		1926	1	0.9999999997470166		1926	1	1			1926	1	0.9995716719750523		1926	1	0.221786		1926	1	0.5323482189730846		1926	1	0.7975572704198989
1927	1	0.9999999999699329		1927	1	0.9999999984333038		1927	1	0.9999981069974792		1927	1	0.9682294898048797			1927	1	0.9367120917187852		1927	1	0.233138		1927	1	0.7091878152563417		1927	1	0.6389235671144751
1928	1	1		1928	1	0.9999999998369442		1928	1	0.9999999980976897		1928	1	0.9999993898707794			1928	1	0.9999999698112828		1928	1	0.22394		1928	1	0.8851896795763433		1928	1	0.9321885204024581
1929	1	0.9999999999963127		1929	1	0.9999729851574889		1929	1	0.9998813434521845		1929	1	0.9999186933364178			1929	1	0.5512395687156884		1929	1	0.352226		1929	1	0.7400386063906421		1929	1	0.7005575955546447
1930	1	1		1930	1	0.9999999999783492		1930	1	0.9999999999907988		1930	1	0.9999999998813661			1930	1	0.9999884243890402		1930	1	0.843474		1930	1	0.9958361670615923		1930	1	0.9350617603167107
1931	1	1		1931	1	0.9999999960872068		1931	1	0.9999999999674822		1931	1	0.9999999997689999			1931	1	0.9999998665447758		1931	1	0.842056		1931	1	0.9879871541861635		1931	1	0.9952754772133461
1932	1	1		1932	1	0.9999999999880703		1932	1	1		1932	1	0.9999999991580862			1932	1	0.9999979983859624		1932	1	0.561669		1932	1	0.9920742248909991		1932	1	0.9860604013585756
1933	1	1		1933	1	0.9999999999771164		1933	1	0.9999999998306839		1933	1	0.9999999996113199			1933	1	0.9999998849005375		1933	1	0.492817		1933	1	0.7667622924235967		1933	1	0.9506775131247749
1934	1	1		1934	1	0.9999999999902386		1934	1	0.9999999531855411		1934	1	0.9999999990192611			1934	1	0.9999957659298087		1934	1	0.847286		1934	1	0.995471		1934	1	0.9959926939894349
1935	1	1		1935	1	0.9999999913996164		1935	1	0.9999999999245406		1935	1	0.9999999977924194			1935	1	0.9998025414238072		1935	1	0.592498		1935	1	0.7374373309528309		1935	1	0.8656212905725305
1936	1	1		1936	1	0.9999999999979472		1936	1	1		1936	1	0.9999997842325202			1936	1	0.9999999995505691		1936	1	0.817065		1936	1	0.9867059568912486		1936	1	0.9995113911383519
1937	1	1		1937	1	0.9999999999805971		1937	1	0.9999999999685143		1937	1	0.9998293178552966			1937	1	0.990014		1937	1	0.353655		1937	1	0.40494759313081147		1937	1	0.6478241911779516
1938	1	1		1938	1	0.9999999999993938		1938	1	1		1938	1	0.9999729332628388			1938	1	0.9998600135624732		1938	1	0.709093		1938	1	0.9368800170854326		1938	1	0.7588454479704507
1939	1	1		1939	1	0.9999999999574334		1939	1	0.9999999999070545		1939	1	0.9999973865969769			1939	1	0.9999986232322895		1939	1	0.203217		1939	1	0.8363920468513406		1939	1	0.8172029054866545
1940	1	1		1940	1	1		1940	1	1		1940	1	0.9999540389312065			1940	1	0.9993391112104226		1940	1	0.81573		1940	1	0.9373984373764145		1940	1	0.9930523829655686
1941	1	1		1941	1	0.9999999999999104		1941	1	0.9999999999513325		1941	1	0.9993491465299758			1941	1	0.9999982559174292		1941	1	0.515338		1941	1	0.79544		1941	1	0.9948115214373393
1942	1	1		1942	1	0.9999999999993459		1942	1	0.9999999999760578		1942	1	0.9999692312638433			1942	1	0.9992631560071586		1942	1	0.76157		1942	1	0.9065237085501351		1942	1	0.9872912796427746
1943	1	1		1943	1	0.9999999999999714		1943	1	0.9999999997787435		1943	1	0.9999958887255588			1943	1	0.9997328984336803		1943	1	0.431701		1943	1	0.6816106291362137		1943	1	0.9855745595565771
1944	1	1		1944	1	0.9999998012185698		1944	1	0.9999999977466539		1944	1	0.9981698530226203			1944	1	0.9999670522269302		1944	1	0.191407		1944	1	0.4487818760698945		1944	1	0.31248878671766583
1945	1	1		1945	1	0.9999999999998979		1945	1	0.9999999997689183		1945	1	0.9999557401087232			1945	1	0.9999996716765837		1945	1	0.23728		1945	1	0.7600679578806436		1945	1	0.9912686914206356
1946	1	1		1946	1	0.9999999999715696		1946	1	0.9999999969140342		1946	1	0.9999850485531486			1946	1	0.9985316453828842		1946	1	0.641932		1946	1	0.9431853006191152		1946	1	0.9750112004910453
1947	1	1		1947	1	0.9999999999971347		1947	1	1		1947	1	0.9993633788799402			1947	1	0.9999951684630561		1947	1	0.890602		1947	1	0.7996162756627118		1947	1	0.7834641716045836
1948	1	1		1948	1	0.9999999997747011		1948	1	0.9999999999817489		1948	1	0.9997022795336731			1948	1	0.9999804294472728		1948	1	0.79023		1948	1	0.9233380951616698		1948	1	0.8988384613111375
1949	1	1		1949	1	0.9999999996903451		1949	1	0.9999999962086006		1949	1	0.9993315432006897			1949	1	0.9997183082433065		1949	1	0.312457		1949	1	0.4088499936254391		1949	1	0.8195156825970524
1950	1	1		1950	1	0.9999999998969088		1950	1	0.9999999994295738		1950	1	0.9999749829088986			1950	1	0.9999988437174702		1950	1	0.593144		1950	1	0.8278806861426796		1950	1	0.9854245217342549
1951	1	1		1951	1	0.9999999999990873		1951	1	0.9999999999836328		1951	1	0.9999383653273317			1951	1	0.9994227578822732		1951	1	0.762028		1951	1	0.9001027985018469		1951	1	0.9865214790983571
1952	1	1		1952	1	0.9999999996517138		1952	1	0.9999999924541056		1952	1	0.9887499883172495			1952	1	0.9979598206567454		1952	1	0.328422		1952	1	0.32186174214286284		1952	1	0.8793201084627323
1953	1	1		1953	1	0.9999996915595124		1953	1	0.9999992687464639		1953	1	0.9987864371391493			1953	1	0.9988		1953	1	0.177407		1953	1	0.0892082		1953	1	0.6244476347263226
1954	1	1		1954	1	0.9999998363646514		1954	1	0.9999999902663341		1954	1	0.9999949721984096			1954	1	0.993702		1954	1	0.403668		1954	1	0.7177368249168898		1954	1	0.97426
1955	1	1		1955	1	0.9999999978537297		1955	1	0.9999996637520093		1955	1	0.9949743105956563			1955	1	0.9954545061425082		1955	1	0.164935		1955	1	0.2721878716666914		1955	1	0.6740513807754409
1956	1	1		1956	1	0.9999999619464129		1956	1	0.999999		1956	1	0.9992627435735676			1956	1	0.999722		1956	1	0.179945		1956	1	0.10280561839677266		1956	1	0.5226620114873589
1957	1	1		1957	1	0.9999997686062331		1957	1	0.9999894933150222		1957	1	0.9988363738719943			1957	1	0.9984323299324521		1957	1	0.128631		1957	1	0.36050054303329565		1957	1	0.822806
1958	1	1		1958	1	0.9998910169958901		1958	1	0.9999999617895609		1958	1	0.9999999850366721			1958	1	0.9978964109556402		1958	1	0.730579		1958	1	0.9862999414965502		1958	1	0.9817283380494174
1959	1	1		1959	1	0.9999997397138798		1959	1	0.999988		1959	1	0.9982611469531841			1959	1	0.9978159231268563		1959	1	0.451301		1959	1	0.6457623072354999		1959	1	0.948573
1960	1	0.9999999999999997		1960	1	0.9999956801553125		1960	1	0.9999999980909757		1960	1	0.9999999984731995			1960	1	0.9931137465267352		1960	1	0.718199		1960	1	0.9857713289061124		1960	1	0.9782144295463372
1961	1	0.9999999999999997		1961	1	0.9999934771255682		1961	1	0.9999999978741488		1961	1	0.9999999985448287			1961	1	0.9949357238027918		1961	1	0.73182		1961	1	0.9877336307360287		1961	1	0.9773696261518672
1962	1	1		1962	1	0.9999999942509399		1962	1	0.9999998627856261		1962	1	0.9895730105854956			1962	1	0.9998012941187394		1962	1	0.521949		1962	1	0.7988969113377546		1962	1	0.7752379303088505
1963	1	1		1963	1	0.9999999968250628		1963	1	0.9999999428646011		1963	1	0.9945448335636898			1963	1	0.9992426627298571		1963	1	0.502327		1963	1	0.79808		1963	1	0.9623853216600482
1964	1	1		1964	1	0.9999999997225908		1964	1	1		1964	1	1			1964	1	0.999714		1964	1	0.70133		1964	1	0.9952133193971467		1964	1	0.992555
1965	1	0.9999999999999997		1965	1	0.9999999998406777		1965	1	1		1965	1	0.9999972421790673			1965	1	0.9999993791045956		1965	1	0.243727		1965	1	0.29265737476385795		1965	1	0.7404456174142591
1966	1	1		1966	1	1		1966	1	0.9999998723331723		1966	1	0.996965			1966	1	0.9992075100080222		1966	1	0.108736		1966	1	0.0780557		1966	1	0.0340879
1967	1	1		1967	1	0.9999999782410204		1967	1	0.9999998306355418		1967	1	0.9999900050614822			1967	1	0.9996993146040684		1967	1	0.735234		1967	1	0.9300447121263543		1967	1	0.9971744629709436
1968	1	0.9999999999999972		1968	1	0.9999835998282198		1968	1	0.9999999446345832		1968	1	1			1968	1	0.999917		1968	1	0.56831		1968	1	0.9159154405852643		1968	1	0.9722363091420648
1969	1	1		1969	1	0.9999999553674545		1969	1	0.9999999999960513		1969	1	0.9999993319481483			1969	1	0.9972269596726506		1969	1	0.963163		1969	1	0.9759372096460629		1969	1	0.9988681740604797
1970	1	1		1970	1	0.9999999999347917		1970	1	0.9993699927689269		1970	1	0.9998563046309864			1970	1	0.9999814261834251		1970	1	0.977835		1970	1	0.9606529678430045		1970	1	0.9971831665821234
1971	1	1		1971	1	0.9999999999989315		1971	1	0.9999999985505598		1971	1	0.9999997659485861			1971	1	0.9997354236271788		1971	1	0.761179		1971	1	0.9898033729686673		1971	1	0.9807712642893709
1972	1	1		1972	1	0.9999999997365948		1972	1	0.9999999999114958		1972	1	0.9999998265299446			1972	1	0.998685		1972	1	0.840329		1972	1	0.9923962116273358		1972	1	0.9840858196203168
1973	1	1		1973	1	1		1973	1	0.9999932173941443		1973	1	0.9999992179591751			1973	1	0.9999726803423113		1973	1	0.54192		1973	1	0.9731177686953641		1973	1	0.9966901479309181
1974	1	1		1974	1	0.9999999999941666		1974	1	0.9999999934134558		1974	1	0.9999997323494616			1974	1	0.9999720118475113		1974	1	0.924992		1974	1	0.9932800645000401		1974	1	0.9914035091619299
1975	1	1		1975	1	0.9999999939753652		1975	1	0.9999879322703417		1975	1	0.9998787573114911			1975	1	0.9999336521355091		1975	1	0.982405		1975	1	0.9618062764197822		1975	1	0.9890936532519486
1976	1	1		1976	1	0.9999999997892997		1976	1	0.9999998704869993		1976	1	0.9999706310667819			1976	1	0.9910031005446681		1976	1	0.928441		1976	1	0.9526920963027634		1976	1	0.9957999915966533
1977	1	1		1977	1	0.9999999999997216		1977	1	0.9999999994999738		1977	1	0.9999999851562269			1977	1	0.999848		1977	1	0.828787		1977	1	0.9676446038285791		1977	1	0.9993081734286716
1978	1	1		1978	1	0.9999999999679205		1978	1	0.9999996813205353		1978	1	0.9999946348333664			1978	1	0.9999533221975975		1978	1	0.918759		1978	1	0.9971133243334385		1978	1	0.9963970201021222
1979	1	1		1979	1	0.9999999999999659		1979	1	0.9999999596936935		1979	1	0.9999985555853697			1979	1	0.9922928418286975		1979	1	0.925254		1979	1	0.962715		1979	1	0.9525883954755209
1980	1	1		1980	1	0.9999998952476042		1980	1	0.9999999948283449		1980	1	0.9994576163594023			1980	1	0.6615345115515038		1980	1	0.522086		1980	1	0.32868756655487086		1980	1	0.1564523358879535
1981	1	1		1981	1	0.9999999999999882		1981	1	0.9999998823852015		1981	1	0.9999970904879999			1981	1	0.9999278539277506		1981	1	0.875678		1981	1	0.9875434073079034		1981	1	0.9945833522912869
1982	1	1		1982	1	0.9999999999999902		1982	1	1		1982	1	0.999998			1982	1	0.9998693287677474		1982	1	0.879655		1982	1	0.9854758463869949		1982	1	0.9924630160139979
1983	1	1		1983	1	0.9999999999762471		1983	1	0.9999999995895182		1983	1	0.9999998730035221			1983	1	0.9934980722555783		1983	1	0.993556		1983	1	0.9983812541240196		1983	1	0.9997906684152557
1984	1	1		1984	1	0.9999999985647817		1984	1	0.9999766974880742		1984	1	0.9998927781465934			1984	1	0.999867		1984	1	0.965962		1984	1	0.9641704617275261		1984	1	0.998129
1985	1	1		1985	1	0.9999999999999744		1985	1	0.9999999635286924		1985	1	0.9999986889840426			1985	1	0.9974213205657658		1985	1	0.574885		1985	1	0.963039		1985	1	0.996473
1986	1	1		1986	1	0.9999999999878267		1986	1	0.9999999751809022		1986	1	0.9999996882145911			1986	1	0.9999920135388284		1986	1	0.843169		1986	1	0.9914956123614068		1986	1	0.9733408712462669
1987	1	1		1987	1	0.9999999999901288		1987	1	0.9999999491361699		1987	1	0.9999993726569665			1987	1	0.9999969807752596		1987	1	0.807138		1987	1	0.993644		1987	1	0.9816258887187533
1988	1	1		1988	1	0.9999999999948567		1988	1	0.9999999998907092		1988	1	0.9999679841945094			1988	1	0.9984894832906476		1988	1	0.433242		1988	1	0.9312617474956263		1988	1	0.9898273110773439
1989	1	1		1989	1	0.9999999977983957		1989	1	0.9999999964387337		1989	1	0.9999914185171375			1989	1	0.9989992553768628		1989	1	0.962836		1989	1	0.9264413423865637		1989	1	0.8889430339906844
1990	1	1		1990	1	0.9999999999979077		1990	1	0.9999999981746325		1990	1	0.999994			1990	1	0.9533628218265304		1990	1	0.45968		1990	1	0.4690672409193215		1990	1	0.5998737383439123
1991	1	1		1991	1	0.9999999991168952		1991	1	0.9999811162408164		1991	1	0.9995793108484775			1991	1	0.9981060793725038		1991	1	0.968496		1991	1	0.9455736817915956		1991	1	0.9921016187023837
1992	1	1		1992	1	0.9999999735975366		1992	1	0.9999984038890375		1992	1	0.9996721186552894			1992	1	0.9999399289300958		1992	1	0.517711		1992	1	0.2809658304265843		1992	1	0.23271376265222546
1993	1	1		1993	1	0.9999999999974061		1993	1	0.9999999903888555		1993	1	0.9999998211884477			1993	1	0.9996363719903243		1993	1	0.81807		1993	1	0.9940931277684771		1993	1	0.9896572098394647
1994	1	1		1994	1	0.9999999999999921		1994	1	0.9999999930651908		1994	1	0.9999989969325914			1994	1	0.9996701286271851		1994	1	0.892013		1994	1	0.9845536101914396		1994	1	0.996442
1995	1	1		1995	1	0.9999999998210353		1995	1	1		1995	1	0.9999998936428138			1995	1	0.9991725051063391		1995	1	0.724107		1995	1	0.9961129600824574		1995	1	0.6162023668230622
1996	1	1		1996	1	1		1996	1	0.9999999861899898		1996	1	0.9999998195668522			1996	1	0.9999798083494101		1996	1	0.936288		1996	1	0.9916643516171572		1996	1	0.9939082588074233
1997	1	1		1997	1	0.9999999996112107		1997	1	0.9999944327764084		1997	1	0.9999723717991329			1997	1	0.9999152955058046		1997	1	0.986777		1997	1	0.9284887222392598		1997	1	0.9951960845456623
[truncated: 13,002 more rows]

## Sheet: Figure 5a&S2
	fpr	tpr	roc_auc	model	tax_rank
macro	[0.00000000e+00 6.84931507e-05 6.94444444e-05 ... 9.99236111e-01 9.99375000e-01 1.00000000e+00]	[0.16140741 0.16340741 0.16607407 ... 1. 1. 1. ]	0.862852	BERTax	class
macro	[0.00000000e+00 6.99300699e-05 7.04225352e-05 ... 9.96760563e-01 9.97857143e-01 1.00000000e+00]	[0.40818618 0.42730383 0.43906853 ... 0.99992647 1. 1. ]	0.934786	BERTax	order
macro	[0.00000000e+00 7.63358779e-05 7.69230769e-05 ... 9.97328244e-01 9.97480916e-01 1.00000000e+00]	[0.49966575 0.54843498 0.56343498 ... 1. 1. 1. ]	0.962203	BERTax	family
macro	[0.00000000e+00 1.01010101e-04 2.02020202e-04 ... 9.98686869e-01 9.99292929e-01 1.00000000e+00]	[0.4666 0.547 0.5866 ... 0.9999 1. 1. ]	0.97612	BERTax	genus
macro	[0.00000000e+00 6.84931507e-05 6.94444444e-05 ... 9.99720280e-01 9.99860140e-01 1.00000000e+00]	[0.1783963 0.2303963 0.23572963 ... 1. 1. 1. ]	0.945564	DNABERT	class
macro	[0.00000000e+00 6.99300699e-05 7.04225352e-05 ... 9.99230769e-01 9.99928058e-01 1.00000000e+00]	[0.24638732 0.28168144 0.29476968 ... 0.99994118 1. 1. ]	0.904975	DNABERT	order
macro	[0.00000000e+00 7.63358779e-05 7.69230769e-05 ... 9.99827586e-01 9.99922481e-01 1.00000000e+00]	[0.37591355 0.42668278 0.43475971 ... 0.99994872 1. 1. ]	0.944158	DNABERT	family
macro	[0.00000000e+00 1.01010101e-04 2.02020202e-04 ... 9.98686869e-01 9.98888889e-01 1.00000000e+00]	[0.4918 0.6237 0.6761 ... 1. 1. 1. ]	0.982166	DNABERT	genus
macro	[0.00000000e+00 6.94444444e-05 6.99300699e-05 1.38888889e-04 1.39860140e-04 2.08333333e-04 2.09790210e-04 2.77777778e-04 3.47222222e-04 3.49650350e-04 4.16666667e-04 4.19580420e-04 4.86111111e-04 5.59440559e-04 6.29370629e-04 7.63888889e-04 7.69230769e-04 8.33333333e-04 8.39160839e-04 9.72222222e-04 9.79020979e-04 1.04166667e-03 1.04895105e-03 1.18055556e-03 1.18881119e-03 1.31944444e-03 1.328671…	[0.71882963 0.7214963 0.7699963 0.77066296 0.77266296 0.7759963 0.7794963 0.78016296 0.7814963 0.7834963 0.79016296 0.79216296 0.79282963 0.79382963 0.79432963 0.7989963 0.7994963 0.80564444 0.80664444 0.80731111 0.80931111 0.80997778 0.81097778 0.81164444 0.81264444 0.81731111 0.81931111 0.81981111 0.82047778 0.82181111 0.82247778 0.83012222 0.83062222 0.83328889 0.83462222 0.83662222 0.83928889…	0.99421	BERTPhylo	class
macro	[0.00000000e+00 6.99300699e-05 7.04225352e-05 ... 9.99160839e-01 9.99285714e-01 1.00000000e+00]	[0.69812134 0.70047429 0.72635664 ... 1. 1. 1. ]	0.978148	BERTPhylo	order
macro	[0.00000000e+00 7.63358779e-05 7.69230769e-05 ... 9.99618321e-01 9.99770992e-01 1.00000000e+00]	[0.77114167 0.79021859 0.79752628 ... 1. 1. 1. ]	0.989437	BERTPhylo	family
macro	[0.00000000e+00 1.01010101e-04 2.02020202e-04 ... 9.99696970e-01 9.99797980e-01 1.00000000e+00]	[0.7071 0.7579 0.7866 ... 1. 1. 1. ]	0.996838	BERTPhylo	genus
micro	[0. 0. 0. ... 0.99889456 0.99892857 1. ]	[0.00000000e+00 6.80272109e-05 9.11564626e-03 ... 1.00000000e+00 1.00000000e+00 1.00000000e+00]	0.92089	BERTax	class
micro	[0. 0. 0. ... 0.99965699 0.99965699 1. ]	[0.00000000e+00 6.94444444e-05 3.06944444e-02 ... 9.99930556e-01 1.00000000e+00 1.00000000e+00]	0.938947	BERTax	order
micro	[0. 0. 0. ... 0.9987642 0.99876657 1. ]	[0.00000000e+00 7.57575758e-05 9.24242424e-03 ... 1.00000000e+00 1.00000000e+00 1.00000000e+00]	0.951185	BERTax	family
micro	[0. 0. 0. ... 0.99866768 0.99866768 1. ]	[0.000e+00 1.000e-04 4.210e-02 ... 9.999e-01 1.000e+00 1.000e+00]	0.977124	BERTax	genus
micro	[0. 0. 0. ... 0.99993197 0.99996599 1. ]	[0.00000000e+00 6.80272109e-05 2.46938776e-02 ... 1.00000000e+00 1.00000000e+00 1.00000000e+00]	0.99078	DNABERT	class
micro	[0. 0. 0. ... 0.99988636 0.99989057 1. ]	[0.00000000e+00 6.94444444e-05 2.03472222e-02 ... 1.00000000e+00 1.00000000e+00 1.00000000e+00]	0.907333	DNABERT	order
micro	[0. 0. 0. ... 0.99979403 0.9997964 1. ]	[0.00000000e+00 7.57575758e-05 1.92424242e-02 ... 1.00000000e+00 1.00000000e+00 1.00000000e+00]	0.930933	DNABERT	family
micro	[0. 0. 0. ... 0.99991515 0.99991717 1. ]	[0.e+00 1.e-04 9.e-04 ... 1.e+00 1.e+00 1.e+00]	0.982892	DNABERT	genus
micro	[0. 0. 0. ... 0.99920068 0.99923469 1. ]	[0.00000000e+00 6.80272109e-05 1.90476190e-02 ... 1.00000000e+00 1.00000000e+00 1.00000000e+00]	0.998923	BERTPhylo	class
micro	[0. 0. 0. ... 0.99968855 0.99969276 1. ]	[0.00000000e+00 6.94444444e-05 2.77777778e-02 ... 1.00000000e+00 1.00000000e+00 1.00000000e+00]	0.978357	BERTPhylo	order
micro	[0. 0. 0. ... 0.99972538 0.99972775 1. ]	[0.00000000e+00 7.57575758e-05 1.10606061e-02 ... 1.00000000e+00 1.00000000e+00 1.00000000e+00]	0.985072	BERTPhylo	family
micro	[0. 0. 0. ... 0.99970606 0.99970808 1. ]	[0.00e+00 1.00e-04 1.22e-02 ... 1.00e+00 1.00e+00 1.00e+00]	0.997135	BERTPhylo	genus

## Sheet: Figure 5b&S3
	recall	precision	average_precision	model	tax_rank
macro	[1. 1. 1. ... 0.16190741 0.16140741 0. ]	[0.00680272 0.00680318 0.00680365 ... 0.99350649 0.99354839 1. ]	0.562502	BERTax	class
macro	[1. 1. 1. ... 0.40934535 0.40818618 0. ]	[0.00694444 0.00694493 0.00694541 ... 0.99798793 0.99799197 1. ]	0.781682	BERTax	order
macro	[1. 1. 1. ... 0.50030998 0.49966575 0. ]	[0.00757576 0.00757633 0.00757691 ... 0.99800399 0.99800797 1. ]	0.823701	BERTax	family
macro	[1. 1. 1. ... 0.4687 0.4666 0. ]	[0.00990793 0.00990892 0.00990991 ... 0.98888889 0.98901099 1. ]	0.815472	BERTax	genus
macro	[1. 1. 1. ... 0.1783963 0.1783963 0. ]	[0.00680272 0.00680318 0.00680365 ... 0.99957663 0.99957681 1. ]	0.795634	DNABERT	class
macro	[1. 1. 1. ... 0.24853438 0.24638732 0. ]	[0. 0.00694444 0.00694493 ... 0.99612403 0.996139 1. ]	0.672179	DNABERT	order
macro	[1. 1. 1. ... 0.37612509 0.37591355 0. ]	[0.00756476 0.00756534 0.00756592 ... 0.99710145 0.99710983 1. ]	0.738918	DNABERT	family
macro	[1. 1. 1. ... 0.4947 0.4918 0. ]	[0.00996778 0.00996878 0.00996979 ... 0.9893617 0.98947368 1. ]	0.847411	DNABERT	genus
macro	[1. 1. 1. ... 0.72031111 0.71882963 0. ]	[0.00680272 0.00680318 0.00680365 ... 0.99990562 0.99990563 1. ]	0.942123	BERTPhylo	class
macro	[1. 1. 1. ... 0.69813865 0.69812134 0. ]	[0.00694444 0.00694493 0.00694541 ... 0.99898063 0.99898167 1. ]	0.908872	BERTPhylo	order
macro	[1. 1. 1. ... 0.77168013 0.77114167 0. ]	[0.00757576 0.00757633 0.00757691 ... 0.99852941 0.99853157 1. ]	0.932848	BERTPhylo	family
macro	[1. 1. 1. ... 0.7158 0.7071 0. ]	[0.01 0.010001 0.010002 ... 0.99 0.99009901 1. ]	0.929676	BERTPhylo	genus
micro	[1.00000000e+00 1.00000000e+00 1.00000000e+00 ... 1.36054422e-04 6.80272109e-05 0.00000000e+00]	[0.2 0.20000272 0.20000544 ... 1. 1. 1. ]	0.786525	BERTax	class
micro	[1.00000000e+00 1.00000000e+00 1.00000000e+00 ... 1.38888889e-04 6.94444444e-05 0.00000000e+00]	[0.02941176 0.02941182 0.02941188 ... 1. 1. 1. ]	0.744131	BERTax	order
micro	[1.00000000e+00 1.00000000e+00 1.00000000e+00 ... 1.51515152e-04 7.57575758e-05 0.00000000e+00]	[0.01538462 0.01538463 0.01538465 ... 1. 1. 1. ]	0.773417	BERTax	family
micro	[1.e+00 1.e+00 1.e+00 ... 2.e-04 1.e-04 0.e+00]	[0.01 0.01000001 0.01000002 ... 1. 1. 1. ]	0.802854	BERTax	genus
micro	[1.00000000e+00 1.00000000e+00 1.00000000e+00 ... 1.36054422e-04 6.80272109e-05 0.00000000e+00]	[0.2 0.20000272 0.20000544 ... 1. 1. 1. ]	0.977414	DNABERT	class
micro	[1.00000000e+00 1.00000000e+00 1.00000000e+00 ... 1.38888889e-04 6.94444444e-05 0.00000000e+00]	[0.02941176 0.02941182 0.02941188 ... 1. 1. 1. ]	0.599318	DNABERT	order
micro	[1.00000000e+00 1.00000000e+00 1.00000000e+00 ... 1.51515152e-04 7.57575758e-05 0.00000000e+00]	[0.01538462 0.01538463 0.01538465 ... 1. 1. 1. ]	0.681651	DNABERT	family
micro	[1.e+00 1.e+00 1.e+00 ... 2.e-04 1.e-04 0.e+00]	[0.01 0.01000001 0.01000002 ... 1. 1. 1. ]	0.832613	DNABERT	genus
micro	[1.00000000e+00 1.00000000e+00 1.00000000e+00 ... 1.36054422e-04 6.80272109e-05 0.00000000e+00]	[0.2 0.20000272 0.20000544 ... 1. 1. 1. ]	0.996761	BERTPhylo	class
micro	[1.00000000e+00 1.00000000e+00 1.00000000e+00 ... 1.38888889e-04 6.94444444e-05 0.00000000e+00]	[0.02941176 0.02941182 0.02941188 ... 1. 1. 1. ]	0.891502	BERTPhylo	order
micro	[1.00000000e+00 1.00000000e+00 1.00000000e+00 ... 1.51515152e-04 7.57575758e-05 0.00000000e+00]	[0.01538462 0.01538463 0.01538465 ... 1. 1. 1. ]	0.899929	BERTPhylo	family
micro	[1.e+00 1.e+00 1.e+00 ... 2.e-04 1.e-04 0.e+00]	[0.01 0.01000001 0.01000002 ... 1. 1. 1. ]	0.895649	BERTPhylo	genus

## Sheet: Figure 5c&S4a
class					order					family					genus
	fpr	tpr	roc_auc			fpr	tpr	roc_auc			fpr	tpr	roc_auc			fpr	tpr	roc_auc
Jungermanniopsida	[0.00000000e+00 0.00000000e+00 0.00000000e+00 6.99300699e-05 6.99300699e-05 1.39860140e-04 1.39860140e-04 2.09790210e-04 2.09790210e-04 3.49650350e-04 3.49650350e-04 4.19580420e-04 4.19580420e-04 5.59440559e-04 5.59440559e-04 6.29370629e-04 6.29370629e-04 1.04895105e-03 1.04895105e-03 1.32867133e-03 1.32867133e-03 1.39860140e-03 1.39860140e-03 1.95804196e-03 1.95804196e-03 2.37762238e-03 2.377622…	[0. 0.0025 0.5275 0.5275 0.74 0.74 0.745 0.745 0.75 0.75 0.7575 0.7575 0.7625 0.7625 0.7675 0.7675 0.77 0.77 0.775 0.775 0.785 0.785 0.7875 0.7875 0.795 0.795 0.7975 0.7975 0.8 0.8 0.8025 0.8025 0.81 0.81 0.8125 0.8125 0.815 0.815 0.8175 0.8175 0.825 0.825 0.8275 0.8275 0.83 0.83 0.8325 0.8325 0.8375 0.8375 0.84 0.84 0.8425 0.8425 0.845 0.845 0.8475 0.8475 0.85 0.85 0.8525 0.8525 0.855 0.855 0.85…	0.991363		Alismatales	[0.00000000e+00 0.00000000e+00 0.00000000e+00 7.04225352e-05 7.04225352e-05 1.40845070e-04 1.40845070e-04 3.52112676e-04 3.52112676e-04 4.22535211e-04 4.22535211e-04 1.97183099e-03 1.97183099e-03 2.74647887e-03 2.74647887e-03 2.81690141e-03 2.95774648e-03 5.00000000e-03 5.00000000e-03 8.66197183e-03 8.66197183e-03 1.22535211e-02 1.23943662e-02 2.27464789e-02 2.28873239e-02 4.85915493e-02 4.873239…	[0. 0.005 0.915 0.915 0.96 0.96 0.965 0.965 0.975 0.975 0.98 0.98 0.985 0.985 0.99 0.99 0.99 0.99 0.995 0.995 1. 1. 1. 1. 1. 1. 1. 1. 1. 1. 1. 1. 1. 1. 1. 1. 1. 1. 1. 1. 1. 1. 1. 1. 1. 1. 1. 1. 1. 1. 1. 1. 1. 1. 1. 1. 1. 1. 1. 1. 1. 1. 1. 1. 1. 1. 1. 1. 1. 1. 1. 1. 1. 1. 1. 1. 1. 1. 1. 1. 1. 1. 1. 1. 1. 1. 1. 1. 1. 1. 1. 1. 1. 1. 1. 1. 1. 1. 1. 1. 1. 1. 1. 1. 1. 1. 1. 1. 1. 1. 1. 1. 1. 1. 1. 1. 1…	0.999899		Adoxaceae	[0.00000000e+00 0.00000000e+00 0.00000000e+00 0.00000000e+00 0.00000000e+00 2.29007634e-04 2.29007634e-04 7.63358779e-04 7.63358779e-04 3.58778626e-03 3.58778626e-03 4.27480916e-03 4.27480916e-03 5.41984733e-03 5.41984733e-03 6.56488550e-03 6.56488550e-03 1.95419847e-02 1.95419847e-02 2.51908397e-02 2.51908397e-02 3.51145038e-02 3.52671756e-02 5.46564885e-02 5.48091603e-02 5.57251908e-02 5.587786…	[0. 0.01 0.49 0.51 0.9 0.9 0.92 0.92 0.93 0.93 0.94 0.94 0.95 0.95 0.96 0.96 0.97 0.97 0.98 0.98 0.99 0.99 0.99 0.99 0.99 0.99 0.99 0.99 1. 1. 1. 1. 1. 1. 1. 1. 1. 1. 1. 1. 1. 1. 1. 1. 1. 1. 1. 1. 1. 1. 1. 1. 1. 1. 1. 1. 1. 1. 1. 1. 1. 1. 1. 1. 1. 1. 1. 1. 1. 1. 1. 1. 1. 1. 1. 1. 1. 1. 1. 1. 1. 1. 1. 1. 1. 1. 1. 1. 1. 1. 1. 1. 1. 1. 1. 1. 1. 1. 1. 1. 1. 1. 1. 1. 1. 1. 1. 1. 1. 1. 1. 1. 1. 1. 1. 1…	0.998651		Acacia	[0.00000000e+00 0.00000000e+00 0.00000000e+00 2.02020202e-04 2.02020202e-04 4.04040404e-04 4.04040404e-04 6.06060606e-04 6.06060606e-04 7.07070707e-04 7.07070707e-04 9.09090909e-04 9.09090909e-04 1.01010101e-03 1.01010101e-03 1.31313131e-03 1.31313131e-03 2.32323232e-03 2.32323232e-03 2.42424242e-03 2.42424242e-03 2.52525253e-03 2.52525253e-03 2.62626263e-03 2.62626263e-03 2.82828283e-03 2.828282…	[0. 0.01 0.05 0.05 0.17 0.17 0.18 0.18 0.19 0.19 0.21 0.21 0.22 0.22 0.31 0.31 0.32 0.32 0.33 0.33 0.35 0.35 0.36 0.36 0.37 0.37 0.39 0.39 0.4 0.4 0.42 0.42 0.44 0.44 0.45 0.45 0.47 0.47 0.48 0.48 0.5 0.5 0.51 0.51 0.52 0.52 0.53 0.53 0.55 0.55 0.56 0.56 0.57 0.57 0.58 0.58 0.59 0.59 0.6 0.6 0.61 0.61 0.62 0.62 0.63 0.63 0.64 0.64 0.66 0.66 0.67 0.67 0.68 0.68 0.69 0.69 0.7 0.7 0.71 0.71 0.72 0.7…	0.987714
Magnoliopsida	[0.00000000e+00 0.00000000e+00 0.00000000e+00 0.00000000e+00 0.00000000e+00 0.00000000e+00 0.00000000e+00 0.00000000e+00 0.00000000e+00 0.00000000e+00 0.00000000e+00 0.00000000e+00 0.00000000e+00 0.00000000e+00 0.00000000e+00 0.00000000e+00 0.00000000e+00 0.00000000e+00 0.00000000e+00 0.00000000e+00 0.00000000e+00 0.00000000e+00 0.00000000e+00 0.00000000e+00 0.00000000e+00 0.00000000e+00 0.000000…	[0.00000000e+00 7.40740741e-05 1.17037037e-02 1.18518519e-02 2.43703704e-02 2.45185185e-02 3.49629630e-02 3.51111111e-02 3.82962963e-02 3.84444444e-02 4.67407407e-02 4.68888889e-02 4.91851852e-02 4.93333333e-02 5.98518519e-02 6.00000000e-02 7.62962963e-02 7.64444444e-02 9.04444444e-02 9.05925926e-02 1.06592593e-01 1.06740741e-01 1.41185185e-01 1.41333333e-01 1.51555556e-01 1.51703704e-01 1.650370…	0.99538		Apiales	[0.00000000e+00 0.00000000e+00 0.00000000e+00 0.00000000e+00 0.00000000e+00 7.04225352e-05 7.04225352e-05 2.11267606e-04 2.11267606e-04 2.81690141e-04 2.81690141e-04 3.52112676e-04 3.52112676e-04 4.22535211e-04 4.22535211e-04 7.04225352e-04 7.04225352e-04 8.45070423e-04 8.45070423e-04 2.88732394e-03 2.88732394e-03 3.23943662e-03 3.23943662e-03 4.78873239e-03 4.92957746e-03 1.54929577e-02 1.563380…	[0. 0.005 0.23 0.24 0.755 0.755 0.88 0.88 0.9 0.9 0.915 0.915 0.92 0.92 0.94 0.94 0.945 0.945 0.95 0.95 0.955 0.955 0.96 0.96 0.96 0.96 0.96 0.96 0.965 0.965 0.965 0.965 0.965 0.965 0.965 0.965 0.965 0.965 0.965 0.965 0.965 0.965 0.965 0.965 0.965 0.965 0.965 0.965 0.965 0.965 0.965 0.965 0.97 0.97 0.97 0.97 0.97 0.97 0.97 0.97 0.97 0.97 0.97 0.97 0.97 0.97 0.97 0.97 0.97 0.97 0.97 0.97 0.975 0.9…	0.97865		Amaryllidaceae	[0.00000000e+00 0.00000000e+00 0.00000000e+00 7.63358779e-05 7.63358779e-05 1.52671756e-04 1.52671756e-04 3.05343511e-04 3.05343511e-04 4.58015267e-04 4.58015267e-04 6.94656489e-02 6.96183206e-02 7.11450382e-02 7.12977099e-02 8.12213740e-02 8.13740458e-02 8.48091603e-02 8.49618321e-02 1.52442748e-01 1.52595420e-01 1.96106870e-01 1.96259542e-01 2.01450382e-01 2.01603053e-01 2.12671756e-01 2.128244…	[0. 0.01 0.7 0.7 0.94 0.94 0.97 0.97 0.98 0.98 1. 1. 1. 1. 1. 1. 1. 1. 1. 1. 1. 1. 1. 1. 1. 1. 1. 1. 1. 1. 1. 1. 1. 1. 1. 1. 1. 1. 1. 1. 1. 1. 1. 1. 1. 1. 1. 1. 1. 1. 1. 1. 1. 1. 1. 1. 1. 1. 1. 1. 1. 1. 1. 1. 1. 1. 1. 1. 1. 1. 1. 1. 1. 1. 1. 1. 1. 1. 1. 1. 1. 1. 1. 1. 1. 1. 1. 1. 1. 1. 1. 1. 1. 1. 1. 1. 1. 1. 1. 1. 1. 1. 1. 1. 1. 1. 1. 1. 1. 1. 1. 1. 1. 1. 1. 1. 1. 1. 1. 1. 1. 1. 1. 1. 1. 1. 1. 1…	0.999965		Acer	[0.00000000e+00 0.00000000e+00 0.00000000e+00 1.01010101e-04 1.01010101e-04 3.03030303e-04 3.03030303e-04 4.04040404e-04 4.04040404e-04 6.06060606e-04 6.06060606e-04 1.41414141e-03 1.41414141e-03 1.71717172e-03 1.71717172e-03 2.02020202e-03 2.02020202e-03 2.12121212e-03 2.12121212e-03 2.92929293e-03 2.92929293e-03 3.03030303e-03 3.03030303e-03 3.13131313e-03 3.13131313e-03 3.23232323e-03 3.232323…	[0. 0.01 0.74 0.74 0.76 0.76 0.77 0.77 0.78 0.78 0.82 0.82 0.83 0.83 0.84 0.84 0.85 0.85 0.87 0.87 0.88 0.88 0.89 0.89 0.9 0.9 0.91 0.91 0.93 0.93 0.94 0.94 0.95 0.95 0.96 0.96 0.97 0.97 0.98 0.98 0.99 0.99 0.99 0.99 0.99 0.99 0.99 0.99 0.99 0.99 0.99 0.99 1. 1. 1. 1. 1. 1. 1. 1. 1. 1. 1. 1. 1. 1. 1. 1. 1. 1. 1. 1. 1. 1. 1. 1. 1. 1. 1. 1. 1. 1. 1. 1. 1. 1. 1. 1. 1. 1. 1. 1. 1. 1. 1. 1. 1. 1. 1. 1…	0.998105
Pinopsida	[0.00000000e+00 0.00000000e+00 0.00000000e+00 0.00000000e+00 0.00000000e+00 0.00000000e+00 0.00000000e+00 0.00000000e+00 0.00000000e+00 6.94444444e-05 6.94444444e-05 1.38888889e-04 1.38888889e-04 2.08333333e-04 2.08333333e-04 2.77777778e-04 2.77777778e-04 3.47222222e-04 3.47222222e-04 4.16666667e-04 4.16666667e-04 4.86111111e-04 4.86111111e-04 7.63888889e-04 7.63888889e-04 7.63888889e-04 7.638888…	[0. 0.00333333 0.08666667 0.09333333 0.23 0.23666667 0.26 0.26666667 0.58666667 0.58666667 0.6 0.6 0.60333333 0.60333333 0.62 0.62 0.62333333 0.62333333 0.63 0.63 0.66333333 0.66333333 0.66666667 0.66666667 0.67333333 0.68 0.69 0.69 0.71333333 0.71333333 0.71666667 0.71666667 0.72 0.72 0.72333333 0.72333333 0.74666667 0.74666667 0.75 0.75 0.75666667 0.75666667 0.76 0.76 0.76333333 0.76333333 0.77…	0.993968		Aquifoliales	[0.00000000e+00 0.00000000e+00 0.00000000e+00 0.00000000e+00 0.00000000e+00 6.99300699e-05 6.99300699e-05 1.39860140e-04 1.39860140e-04 2.09790210e-04 2.09790210e-04 6.99300699e-04 6.99300699e-04 2.02797203e-03 2.02797203e-03 2.51748252e-03 2.51748252e-03 2.65734266e-03 2.65734266e-03 1.67132867e-02 1.68531469e-02 2.19580420e-02 2.20979021e-02 3.90209790e-02 3.91608392e-02 3.98601399e-02 4.000000…	[0. 0.01 0.31 0.33 0.82 0.82 0.88 0.88 0.92 0.92 0.95 0.95 0.96 0.96 0.97 0.97 0.98 0.98 0.99 0.99 0.99 0.99 0.99 0.99 0.99 0.99 0.99 0.99 1. 1. 1. 1. 1. 1. 1. 1. 1. 1. 1. 1. 1. 1. 1. 1. 1. 1. 1. 1. 1. 1. 1. 1. 1. 1. 1. 1. 1. 1. 1. 1. 1. 1. 1. 1. 1. 1. 1. 1. 1. 1. 1. 1. 1. 1. 1. 1. 1. 1. 1. 1. 1. 1. 1. 1. 1. 1. 1. 1. 1. 1. 1. 1. 1. 1. 1. 1. 1. 1. 1. 1. 1. 1. 1. 1. 1. 1. 1. 1. 1. 1. 1. 1. 1. 1. 1.…	0.99939		Apiaceae	[0.00000000e+00 0.00000000e+00 0.00000000e+00 0.00000000e+00 0.00000000e+00 7.69230769e-05 7.69230769e-05 1.53846154e-04 1.53846154e-04 2.30769231e-04 2.30769231e-04 6.92307692e-04 6.92307692e-04 4.53846154e-03 4.69230769e-03 5.69230769e-03 5.69230769e-03 1.69230769e-02 1.69230769e-02 3.36923077e-02 3.38461538e-02 4.86153846e-02 4.86153846e-02 6.32307692e-02 6.33846154e-02 6.98461538e-02 7.000000…	[0. 0.005 0.295 0.305 0.705 0.705 0.85 0.85 0.935 0.935 0.945 0.945 0.95 0.95 0.95 0.95 0.955 0.955 0.96 0.96 0.96 0.96 0.965 0.965 0.965 0.965 0.965 0.965 0.965 0.965 0.965 0.965 0.965 0.965 0.97 0.97 0.97 0.97 0.97 0.97 0.97 0.97 0.97 0.97 0.97 0.97 0.97 0.97 0.97 0.97 0.97 0.97 0.97 0.97 0.97 0.97 0.975 0.975 0.975 0.975 0.975 0.975 0.975 0.975 0.975 0.975 0.975 0.975 0.975 0.975 0.975 0.975 0…	0.977575		Adiantum	[0. 0. 0. 0.00929293 0.00949495 0.01737374 0.01737374 0.08686869 0.08707071 0.12626263 0.12646465 0.20484848 0.20505051 0.20626263 0.20646465 0.21151515 0.21171717 0.21555556 0.21575758 0.25353535 0.25373737 0.29717172 0.29737374 0.35424242 0.35444444 0.40353535 0.40373737 0.4159596 0.41616162 0.42828283 0.42848485 0.44747475 0.44767677 0.44949495 0.44969697 0.45292929 0.45313131 0.46161616 0.461…	[0. 0.01 0.99 0.99 0.99 0.99 1. 1. 1. 1. 1. 1. 1. 1. 1. 1. 1. 1. 1. 1. 1. 1. 1. 1. 1. 1. 1. 1. 1. 1. 1. 1. 1. 1. 1. 1. 1. 1. 1. 1. 1. 1. 1. 1. 1. 1. 1. 1. 1. 1. 1. 1. 1. 1. 1. 1. 1. 1. 1. 1. 1. 1. 1. 1. 1. 1. 1. 1. 1. 1. 1. 1. 1. 1. 1. 1. 1. 1. 1. 1. 1. 1. 1. 1. 1. 1. 1. 1. 1. 1. 1. 1. ]	0.999826
Polypodiopsida	[0.00000000e+00 0.00000000e+00 0.00000000e+00 6.99300699e-05 6.99300699e-05 1.39860140e-04 1.39860140e-04 2.09790210e-04 2.09790210e-04 3.49650350e-04 3.49650350e-04 4.19580420e-04 4.19580420e-04 7.69230769e-04 7.69230769e-04 8.39160839e-04 8.39160839e-04 9.79020979e-04 9.79020979e-04 1.18881119e-03 1.18881119e-03 1.67832168e-03 1.67832168e-03 1.95804196e-03 1.95804196e-03 2.09790210e-03 2.097902…	[0. 0.0025 0.7125 0.7125 0.7425 0.7425 0.7475 0.7475 0.76 0.76 0.7625 0.7625 0.7675 0.7675 0.77 0.77 0.775 0.775 0.785 0.785 0.79 0.79 0.7925 0.7925 0.795 0.795 0.7975 0.7975 0.8 0.8 0.8025 0.8025 0.805 0.805 0.81 0.81 0.8175 0.8175 0.82 0.82 0.825 0.825 0.8275 0.8275 0.83 0.83 0.8325 0.8325 0.835 0.84 0.84 0.845 0.845 0.8475 0.8475 0.85 0.85 0.8525 0.8525 0.855 0.855 0.8625 0.8625 0.865 0.865 0.…	0.990433		Asparagales	[0.00000000e+00 0.00000000e+00 0.00000000e+00 0.00000000e+00 0.00000000e+00 7.40740741e-05 7.40740741e-05 1.48148148e-04 1.48148148e-04 2.22222222e-04 2.22222222e-04 2.96296296e-04 2.96296296e-04 3.70370370e-04 3.70370370e-04 4.44444444e-04 4.44444444e-04 5.18518519e-04 5.18518519e-04 5.92592593e-04 5.92592593e-04 6.66666667e-04 6.66666667e-04 7.40740741e-04 7.40740741e-04 8.14814815e-04 8.148148…	[0. 0.00111111 0.29222222 0.29444444 0.54666667 0.54666667 0.56111111 0.56111111 0.59111111 0.59111111 0.62444444 0.62444444 0.64888889 0.64888889 0.65111111 0.65111111 0.69 0.69 0.70555556 0.70555556 0.70666667 0.70666667 0.71 0.71 0.71111111 0.71111111 0.72222222 0.72222222 0.73 0.73 0.73888889 0.73888889 0.74555556 0.74555556 0.75 0.75 0.75222222 0.75222222 0.76444444 0.76444444 0.77333333 0.7…	0.988601		Aquifoliaceae	[0.00000000e+00 0.00000000e+00 0.00000000e+00 0.00000000e+00 0.00000000e+00 1.52671756e-04 1.52671756e-04 2.29007634e-04 2.29007634e-04 3.05343511e-04 3.05343511e-04 6.87022901e-04 6.87022901e-04 7.63358779e-04 7.63358779e-04 1.37404580e-03 1.37404580e-03 1.67938931e-03 1.67938931e-03 1.75572519e-03 1.75572519e-03 2.44274809e-03 2.44274809e-03 5.57251908e-03 5.72519084e-03 7.48091603e-03 7.480916…	[0. 0.01 0.38 0.4 0.78 0.78 0.82 0.82 0.83 0.83 0.84 0.84 0.85 0.85 0.88 0.88 0.89 0.89 0.9 0.9 0.91 0.91 0.92 0.92 0.92 0.92 0.93 0.93 0.94 0.94 0.95 0.95 0.96 0.96 0.97 0.97 0.97 0.97 0.98 0.98 0.99 0.99 1. 1. 1. 1. 1. 1. 1. 1. 1. 1. 1. 1. 1. 1. 1. 1. 1. 1. 1. 1. 1. 1. 1. 1. 1. 1. 1. 1. 1. 1. 1. 1. 1. 1. 1. 1. 1. 1. 1. 1. 1. 1. 1. 1. 1. 1. 1. 1. 1. 1. 1. 1. 1. 1. 1. 1. 1. 1. 1. 1. 1. 1. 1. 1. 1…	0.998094		Allium	[0.00000000e+00 0.00000000e+00 0.00000000e+00 1.01010101e-04 1.01010101e-04 3.03030303e-04 3.03030303e-04 4.04040404e-04 4.04040404e-04 8.08080808e-04 8.08080808e-04 9.09090909e-04 9.09090909e-04 2.12121212e-03 2.12121212e-03 2.22222222e-03 2.22222222e-03 2.42424242e-03 2.42424242e-03 2.52525253e-03 2.52525253e-03 2.72727273e-03 2.72727273e-03 3.03030303e-03 3.03030303e-03 3.13131313e-03 3.131313…	[0. 0.01 0.54 0.54 0.57 0.57 0.67 0.67 0.72 0.72 0.73 0.73 0.76 0.76 0.77 0.77 0.79 0.79 0.8 0.8 0.81 0.81 0.82 0.82 0.83 0.83 0.84 0.84 0.85 0.85 0.86 0.86 0.88 0.88 0.89 0.89 0.9 0.9 0.91 0.91 0.92 0.92 0.93 0.93 0.94 0.94 0.95 0.95 0.96 0.96 0.97 0.97 0.98 0.98 0.99 0.99 0.99 0.99 0.99 0.99 0.99 0.99 0.99 0.99 0.99 0.99 0.99 0.99 0.99 0.99 0.99 0.99 0.99 0.99 0.99 0.99 1. 1. 1. 1. 1. 1. 1. 1. …	0.993995
Sphagnopsida	[0. 0. 0. 0.00753425 0.00767123 0.02328767 0.02328767 0.02486301 0.025 0.03164384 0.03178082 0.05623288 0.05636986 0.06541096 0.06554795 0.0660274 0.06616438 0.08506849 0.08520548 0.09561644 0.09575342 0.09780822 0.09794521 0.10157534 0.10171233 0.12719178 0.12732877 0.12869863 0.12883562 0.12890411 0.1290411 0.13212329 0.13226027 0.13486301 0.135 0.15486301 0.155 0.21506849 0.21520548 0.23493151…	[0. 0.01 0.99 0.99 0.99 0.99 1. 1. 1. 1. 1. 1. 1. 1. 1. 1. 1. 1. 1. 1. 1. 1. 1. 1. 1. 1. 1. 1. 1. 1. 1. 1. 1. 1. 1. 1. 1. 1. 1. 1. 1. 1. 1. 1. 1. 1. 1. 1. 1. 1. 1. 1. 1. 1. 1. 1. 1. 1. 1. 1. 1. 1. 1. 1. 1. 1. 1. 1. 1. 1. 1. 1. 1. 1. 1. 1. 1. 1. 1. 1. 1. 1. 1. 1. 1. 1. 1. 1. 1. 1. 1. 1. 1. 1. 1. 1. 1. 1. 1. 1. 1. 1. 1. 1. 1. 1. 1. 1. 1. 1. 1. 1. 1. 1. 1. 1. 1. 1. 1. 1. 1. 1. 1. 1. 1. 1. 1. 1. 1. 1…	0.999767		Asterales	[0.00000000e+00 0.00000000e+00 0.00000000e+00 0.00000000e+00 0.00000000e+00 1.45985401e-04 1.45985401e-04 2.18978102e-04 2.18978102e-04 2.91970803e-04 2.91970803e-04 3.64963504e-04 3.64963504e-04 3.64963504e-04 3.64963504e-04 4.37956204e-04 4.37956204e-04 5.10948905e-04 5.10948905e-04 5.83941606e-04 5.83941606e-04 6.56934307e-04 6.56934307e-04 7.29927007e-04 7.29927007e-04 8.02919708e-04 8.029197…	[0. 0.00142857 0.06428571 0.06714286 0.28285714 0.28285714 0.32714286 0.32714286 0.34857143 0.34857143 0.35142857 0.35142857 0.39428571 0.39714286 0.42 0.42 0.46 0.46 0.46714286 0.46714286 0.47 0.47 0.49142857 0.49142857 0.49571429 0.49571429 0.51285714 0.51285714 0.52857143 0.52857143 0.54714286 0.54714286 0.55285714 0.55285714 0.56857143 0.56857143 0.58571429 0.58571429 0.58714286 0.58714286 0.…	0.986102		Aspleniaceae	[0. 0. 0. 0.02290076 0.02305344 0.04007634 0.04022901 0.07198473 0.0721374 0.07534351 0.07549618 0.08862595 0.08877863 0.14076336 0.14091603 0.14832061 0.14847328 0.19244275 0.19259542 0.23717557 0.23732824 0.27 0.27015267 0.28328244 0.28343511 0.28984733 0.29 0.29442748 0.29458015 0.2970229 0.29717557 0.30068702 0.30083969 0.3048855 0.30503817 0.30969466 0.30984733 0.32198473 0.3221374 0.3270992…	[0. 0.01 1. 1. 1. 1. 1. 1. 1. 1. 1. 1. 1. 1. 1. 1. 1. 1. 1. 1. 1. 1. 1. 1. 1. 1. 1. 1. 1. 1. 1. 1. 1. 1. 1. 1. 1. 1. 1. 1. 1. 1. 1. 1. 1. 1. 1. 1. 1. 1. 1. 1. 1. 1. 1. 1. 1. 1. 1. 1. 1. 1. 1. 1. 1. 1. 1. 1. 1. 1. 1. 1. 1. 1. 1. 1. 1. 1. 1. 1. 1. 1. 1. 1. 1. 1. 1. 1. 1. 1. 1. 1. 1. 1. 1. 1. 1. 1. 1. 1. 1. 1. 1. 1. 1. 1. 1. 1. 1. 1. 1. 1. 1. 1. 1. 1. 1. 1. 1. 1. 1. 1. ]	1		Arabidopsis	[0.00000000e+00 0.00000000e+00 0.00000000e+00 1.01010101e-04 1.01010101e-04 2.02020202e-04 2.02020202e-04 3.03030303e-04 3.03030303e-04 8.08080808e-04 8.08080808e-04 1.11111111e-03 1.11111111e-03 1.21212121e-03 1.21212121e-03 1.41414141e-03 1.41414141e-03 1.51515152e-03 1.51515152e-03 1.61616162e-03 1.61616162e-03 2.02020202e-03 2.02020202e-03 2.22222222e-03 2.22222222e-03 2.52525253e-03 2.525252…	[0. 0.01 0.51 0.51 0.54 0.54 0.56 0.56 0.57 0.57 0.58 0.58 0.59 0.59 0.6 0.6 0.61 0.61 0.63 0.63 0.64 0.64 0.65 0.65 0.66 0.66 0.69 0.69 0.7 0.7 0.72 0.72 0.73 0.73 0.74 0.74 0.76 0.76 0.77 0.77 0.79 0.79 0.8 0.8 0.82 0.82 0.84 0.84 0.87 0.87 0.88 0.88 0.91 0.91 0.92 0.92 0.93 0.93 0.94 0.94 0.95 0.95 0.96 0.96 0.97 0.97 0.98 0.98 0.99 0.99 1. 1. 1. 1. 1. 1. 1. 1. 1. 1. 1. 1. 1. 1. 1. 1. 1. 1. 1.…	0.997293
micro	[0. 0. 0. ... 0.99920068 0.99923469 1. ]	[0.00000000e+00 6.80272109e-05 1.90476190e-02 ... 1.00000000e+00 1.00000000e+00 1.00000000e+00]	0.998923		Brassicales	[0.00000000e+00 0.00000000e+00 0.00000000e+00 7.14285714e-05 7.14285714e-05 1.42857143e-04 1.42857143e-04 2.85714286e-04 2.85714286e-04 3.57142857e-04 3.57142857e-04 4.28571429e-04 4.28571429e-04 5.71428571e-04 5.71428571e-04 9.28571429e-04 9.28571429e-04 2.35714286e-03 2.35714286e-03 4.78571429e-03 4.78571429e-03 5.92857143e-03 5.92857143e-03 6.28571429e-03 6.28571429e-03 1.08571429e-02 1.085714…	[0. 0.0025 0.9175 0.9175 0.9325 0.9325 0.9625 0.9625 0.965 0.965 0.97 0.97 0.9725 0.9725 0.9775 0.9775 0.985 0.985 0.9875 0.9875 0.99 0.99 0.9925 0.9925 0.995 0.995 0.9975 0.9975 0.9975 0.9975 0.9975 0.9975 0.9975 0.9975 0.9975 0.9975 0.9975 0.9975 1. 1. 1. 1. 1. 1. 1. 1. 1. 1. 1. 1. 1. 1. 1. 1. 1. 1. 1. 1. 1. 1. 1. 1. 1. 1. 1. 1. 1. 1. 1. 1. 1. 1. 1. 1. 1. 1. 1. 1. 1. 1. 1. 1. 1. 1. 1. 1. 1. 1. …	0.999521		Asteraceae	[0.00000000e+00 0.00000000e+00 0.00000000e+00 0.00000000e+00 0.00000000e+00 7.87401575e-05 7.87401575e-05 7.87401575e-05 7.87401575e-05 1.57480315e-04 1.57480315e-04 1.57480315e-04 1.57480315e-04 3.93700787e-04 3.93700787e-04 4.72440945e-04 4.72440945e-04 5.51181102e-04 5.51181102e-04 6.29921260e-04 6.29921260e-04 7.87401575e-04 7.87401575e-04 8.66141732e-04 8.66141732e-04 9.44881890e-04 9.448818…	[0. 0.002 0.338 0.342 0.5 0.5 0.678 0.682 0.72 0.72 0.74 0.744 0.856 0.856 0.882 0.882 0.884 0.884 0.89 0.89 0.894 0.894 0.9 0.9 0.904 0.904 0.906 0.906 0.908 0.908 0.91 0.91 0.912 0.912 0.916 0.916 0.918 0.918 0.92 0.92 0.922 0.922 0.924 0.924 0.926 0.926 0.93 0.93 0.932 0.932 0.934 0.934 0.936 0.936 0.936 0.936 0.938 0.938 0.94 0.94 0.942 0.942 0.944 0.944 0.946 0.946 0.948 0.948 0.95 0.95 0.95…	0.984595		Artemisia	[0.00000000e+00 0.00000000e+00 0.00000000e+00 2.02020202e-04 2.02020202e-04 4.04040404e-04 4.04040404e-04 5.05050505e-04 5.05050505e-04 8.08080808e-04 8.08080808e-04 1.31313131e-03 1.31313131e-03 1.71717172e-03 1.71717172e-03 1.81818182e-03 1.81818182e-03 2.02020202e-03 2.02020202e-03 2.32323232e-03 2.32323232e-03 2.52525253e-03 2.52525253e-03 2.72727273e-03 2.72727273e-03 2.92929293e-03 2.929292…	[0. 0.01 0.59 0.59 0.6 0.6 0.62 0.62 0.64 0.64 0.65 0.65 0.67 0.67 0.68 0.68 0.69 0.69 0.71 0.71 0.72 0.72 0.77 0.77 0.78 0.78 0.79 0.79 0.82 0.82 0.83 0.83 0.84 0.84 0.85 0.85 0.86 0.86 0.87 0.87 0.88 0.88 0.89 0.89 0.9 0.9 0.91 0.91 0.92 0.92 0.93 0.93 0.94 0.94 0.95 0.95 0.96 0.96 0.97 0.97 0.98 0.98 0.99 0.99 1. 1. 1. 1. 1. 1. 1. 1. 1. 1. 1. 1. 1. 1. 1. 1. 1. 1. 1. 1. 1. 1. 1. 1. 1. 1. 1. 1. …	0.994766
macro	[0.00000000e+00 6.94444444e-05 6.99300699e-05 1.38888889e-04 1.39860140e-04 2.08333333e-04 2.09790210e-04 2.77777778e-04 3.47222222e-04 3.49650350e-04 4.16666667e-04 4.19580420e-04 4.86111111e-04 5.59440559e-04 6.29370629e-04 7.63888889e-04 7.69230769e-04 8.33333333e-04 8.39160839e-04 9.72222222e-04 9.79020979e-04 1.04166667e-03 1.04895105e-03 1.18055556e-03 1.18881119e-03 1.31944444e-03 1.328671…	[0.71882963 0.7214963 0.7699963 0.77066296 0.77266296 0.7759963 0.7794963 0.78016296 0.7814963 0.7834963 0.79016296 0.79216296 0.79282963 0.79382963 0.79432963 0.7989963 0.7994963 0.80564444 0.80664444 0.80731111 0.80931111 0.80997778 0.81097778 0.81164444 0.81264444 0.81731111 0.81931111 0.81981111 0.82047778 0.82181111 0.82247778 0.83012222 0.83062222 0.83328889 0.83462222 0.83662222 0.83928889…	0.99421		Caryophyllales	[0.00000000e+00 0.00000000e+00 0.00000000e+00 0.00000000e+00 0.00000000e+00 0.00000000e+00 0.00000000e+00 0.00000000e+00 0.00000000e+00 7.29927007e-05 7.29927007e-05 1.45985401e-04 1.45985401e-04 2.18978102e-04 2.18978102e-04 2.91970803e-04 2.91970803e-04 3.64963504e-04 3.64963504e-04 4.37956204e-04 4.37956204e-04 5.10948905e-04 5.10948905e-04 5.83941606e-04 5.83941606e-04 6.56934307e-04 6.569343…	[0. 0.00142857 0.45714286 0.46 0.55714286 0.56 0.56285714 0.56571429 0.56857143 0.56857143 0.65 0.65 0.73285714 0.73285714 0.75571429 0.75571429 0.75714286 0.75714286 0.76142857 0.76142857 0.77 0.77 0.77571429 0.77571429 0.78142857 0.78142857 0.78285714 0.78285714 0.78571429 0.78571429 0.78714286 0.78714286 0.78857143 0.78857143 0.79 0.79 0.79142857 0.79142857 0.79571429 0.79571429 0.79714286 0.7…	0.983009		Balsaminaceae	[0.00000000e+00 0.00000000e+00 0.00000000e+00 0.00000000e+00 0.00000000e+00 7.63358779e-05 7.63358779e-05 3.05343511e-04 3.05343511e-04 6.10687023e-04 6.10687023e-04 6.87022901e-04 6.87022901e-04 7.63358779e-04 7.63358779e-04 9.16030534e-04 1.06870229e-03 1.06870229e-03 4.80916031e-03 4.80916031e-03 1.06870229e-02 1.06870229e-02 1.29770992e-02 1.29770992e-02 1.48091603e-02 1.48091603e-02 2.541984…	[0. 0.01 0.73 0.75 0.84 0.84 0.9 0.9 0.91 0.91 0.92 0.92 0.93 0.93 0.94 0.94 0.94 0.95 0.95 0.96 0.96 0.97 0.97 0.98 0.98 0.99 0.99 1. 1. 1. 1. 1. 1. 1. 1. 1. 1. 1. 1. 1. 1. 1. 1. 1. 1. 1. 1. 1. 1. 1. 1. 1. 1. 1. 1. 1. 1. 1. 1. 1. 1. 1. 1. 1. 1. 1. 1. 1. 1. 1. 1. 1. 1. 1. 1. 1. 1. 1. 1. 1. 1. 1. 1. 1. 1. 1. 1. 1. 1. 1. 1. 1. 1. 1. 1. 1. 1. 1. 1. 1. 1. 1. 1. 1. 1. 1. 1. 1. 1. 1. 1. 1. 1. 1. 1. 1. …	0.999274		Artocarpus	[0.00000000e+00 0.00000000e+00 0.00000000e+00 5.05050505e-04 5.05050505e-04 6.06060606e-04 6.06060606e-04 3.50505051e-02 3.52525253e-02 7.53535354e-02 7.55555556e-02 9.01010101e-02 9.01010101e-02 1.30101010e-01 1.30303030e-01 1.39494949e-01 1.39696970e-01 1.70101010e-01 1.70303030e-01 1.90707071e-01 1.90909091e-01 1.98787879e-01 1.98989899e-01 2.47373737e-01 2.47575758e-01 2.72323232e-01 2.725252…	[0. 0.01 0.97 0.97 0.98 0.98 0.99 0.99 0.99 0.99 0.99 0.99 1. 1. 1. 1. 1. 1. 1. 1. 1. 1. 1. 1. 1. 1. 1. 1. 1. 1. 1. 1. 1. 1. 1. 1. 1. 1. 1. 1. 1. 1. 1. 1. 1. 1. 1. 1. 1. 1. 1. 1. 1. 1. 1. 1. 1. 1. 1. 1. 1. 1. 1. 1. 1. 1. 1. 1. 1. 1. 1. 1. 1. 1. 1. 1. 1. 1. 1. 1. 1. 1. 1. 1. 1. 1. 1. 1. 1. 1. 1. 1. 1. 1. 1. 1. ]	0.999088
					Cucurbitales	[0.00000000e+00 0.00000000e+00 0.00000000e+00 7.04225352e-04 7.04225352e-04 8.45070423e-04 8.45070423e-04 1.12676056e-03 1.26760563e-03 1.83098592e-03 1.83098592e-03 1.90140845e-03 1.90140845e-03 3.09859155e-03 3.09859155e-03 4.71830986e-03 4.71830986e-03 5.21126761e-03 5.21126761e-03 1.83802817e-02 1.83802817e-02 3.52816901e-02 3.52816901e-02 4.38732394e-02 4.38732394e-02 4.83098592e-02 4.830985…	[0. 0.005 0.495 0.495 0.5 0.5 0.505 0.505 0.505 0.505 0.51 0.51 0.515 0.515 0.52 0.52 0.525 0.525 0.53 0.53 0.535 0.535 0.54 0.54 0.545 0.545 0.55 0.55 0.55 0.55 0.56 0.56 0.56 0.56 0.565 0.565 0.57 0.57 0.575 0.575 0.58 0.58 0.585 0.585 0.585 0.585 0.585 0.585 0.585 0.585 0.59 0.59 0.595 0.595 0.6 0.6 0.6 0.6 0.605 0.605 0.61 0.61 0.615 0.615 0.615 0.615 0.62 0.62 0.625 0.625 0.63 0.63 0.635 0.6…	0.796092		Brassicaceae	[0.00000000e+00 0.00000000e+00 0.00000000e+00 7.81250000e-05 7.81250000e-05 1.56250000e-04 1.56250000e-04 2.34375000e-04 2.34375000e-04 3.90625000e-04 3.90625000e-04 5.46875000e-04 5.46875000e-04 6.25000000e-04 6.25000000e-04 7.81250000e-04 7.81250000e-04 8.59375000e-04 8.59375000e-04 9.37500000e-04 9.37500000e-04 1.01562500e-03 1.01562500e-03 1.09375000e-03 1.09375000e-03 1.25000000e-03 1.250000…	[0. 0.0025 0.7075 0.7075 0.73 0.73 0.735 0.735 0.7475 0.7475 0.75 0.75 0.755 0.755 0.765 0.765 0.7925 0.7925 0.795 0.795 0.8025 0.8025 0.8925 0.8925 0.915 0.915 0.9475 0.9475 0.98 0.98 0.9825 0.9825 0.985 0.985 0.99 0.99 0.9925 0.9925 0.995 0.995 0.9975 0.9975 1. 1. 1. 1. 1. 1. 1. 1. 1. 1. 1. 1. 1. 1. 1. 1. 1. 1. 1. 1. 1. 1. 1. 1. 1. 1. 1. 1. 1. 1. 1. 1. 1. 1. 1. 1. 1. 1. 1. 1. 1. 1. 1. 1. 1. 1. …	0.999658		Asplenium	[0.00000000e+00 0.00000000e+00 0.00000000e+00 1.01010101e-04 1.01010101e-04 9.09090909e-04 9.09090909e-04 1.01010101e-03 1.01010101e-03 2.02020202e-03 2.02020202e-03 2.22222222e-03 2.22222222e-03 2.92929293e-03 2.92929293e-03 4.24242424e-03 4.24242424e-03 7.37373737e-03 7.37373737e-03 6.90909091e-02 6.92929293e-02 8.92929293e-02 8.94949495e-02 1.59595960e-01 1.59797980e-01 1.70707071e-01 1.709090…	[0. 0.01 0.92 0.92 0.93 0.93 0.94 0.94 0.95 0.95 0.96 0.96 0.97 0.97 0.98 0.98 0.99 0.99 1. 1. 1. 1. 1. 1. 1. 1. 1. 1. 1. 1. 1. 1. 1. 1. 1. 1. 1. 1. 1. 1. 1. 1. 1. 1. 1. 1. 1. 1. 1. 1. 1. 1. 1. 1. 1. 1. 1. 1. 1. 1. 1. 1. 1. 1. 1. 1. 1. 1. 1. 1. 1. 1. 1. 1. 1. 1. 1. 1. 1. 1. 1. 1. 1. 1. 1. 1. 1. 1. 1. 1. 1. 1. 1. 1. 1. 1. 1. 1. 1. 1. 1. 1. 1. 1. ]	0.999792
					Cupressales	[0.00000000e+00 0.00000000e+00 0.00000000e+00 0.00000000e+00 0.00000000e+00 7.04225352e-05 7.04225352e-05 1.40845070e-04 1.40845070e-04 2.11267606e-04 2.11267606e-04 2.11267606e-04 2.11267606e-04 2.81690141e-04 2.81690141e-04 3.52112676e-04 3.52112676e-04 4.22535211e-04 4.22535211e-04 4.92957746e-04 4.92957746e-04 5.63380282e-04 5.63380282e-04 7.04225352e-04 7.04225352e-04 8.45070423e-04 8.450704…	[0. 0.005 0.145 0.155 0.525 0.525 0.55 0.55 0.565 0.565 0.57 0.58 0.59 0.59 0.605 0.605 0.625 0.625 0.63 0.63 0.635 0.635 0.655 0.655 0.66 0.66 0.665 0.665 0.67 0.67 0.675 0.675 0.68 0.68 0.685 0.685 0.69 0.69 0.695 0.695 0.7 0.7 0.705 0.705 0.71 0.71 0.71 0.71 0.715 0.715 0.72 0.72 0.725 0.725 0.73 0.73 0.745 0.745 0.75 0.75 0.755 0.755 0.76 0.76 0.765 0.765 0.77 0.77 0.775 0.775 0.78 0.78 0.785…	0.988721		Cactaceae	[0.00000000e+00 0.00000000e+00 0.00000000e+00 0.00000000e+00 0.00000000e+00 7.63358779e-05 7.63358779e-05 3.81679389e-04 3.81679389e-04 1.75572519e-03 1.75572519e-03 2.65648855e-02 2.67175573e-02 4.57251908e-02 4.58778626e-02 5.04580153e-02 5.06106870e-02 5.98473282e-02 6.00000000e-02 9.17557252e-02 9.19083969e-02 9.37404580e-02 9.38931298e-02 9.80916031e-02 9.82442748e-02 1.18854962e-01 1.190076…	[0. 0.01 0.81 0.83 0.95 0.95 0.96 0.96 0.97 0.97 0.98 0.98 0.98 0.98 0.98 0.98 0.98 0.98 0.98 0.98 0.98 0.98 0.98 0.98 0.98 0.98 0.98 0.98 0.98 0.98 0.99 0.99 0.99 0.99 0.99 0.99 0.99 0.99 1. 1. 1. 1. 1. 1. 1. 1. 1. 1. 1. 1. 1. 1. 1. 1. 1. 1. 1. 1. 1. 1. 1. 1. 1. 1. 1. 1. 1. 1. 1. 1. 1. 1. 1. 1. 1. 1. 1. 1. 1. 1. 1. 1. 1. 1. 1. 1. 1. 1. 1. 1. 1. 1. 1. 1. 1. 1. 1. 1. 1. 1. 1. 1. 1. 1. 1. 1. 1. 1. …	0.996162		Astragalus	[0.00000000e+00 0.00000000e+00 0.00000000e+00 1.01010101e-04 1.01010101e-04 3.03030303e-04 3.03030303e-04 4.04040404e-04 4.04040404e-04 6.06060606e-04 6.06060606e-04 1.01010101e-03 1.01010101e-03 1.11111111e-03 1.11111111e-03 1.31313131e-03 1.31313131e-03 2.02020202e-03 2.02020202e-03 2.22222222e-03 2.22222222e-03 3.53535354e-03 3.53535354e-03 3.63636364e-03 3.63636364e-03 3.83838384e-03 3.838383…	[0. 0.01 0.49 0.49 0.52 0.52 0.53 0.53 0.56 0.56 0.57 0.57 0.59 0.59 0.6 0.6 0.61 0.61 0.62 0.62 0.63 0.63 0.64 0.64 0.66 0.66 0.68 0.68 0.69 0.69 0.7 0.7 0.71 0.71 0.72 0.72 0.73 0.73 0.74 0.74 0.76 0.76 0.78 0.78 0.79 0.79 0.8 0.8 0.82 0.82 0.83 0.83 0.84 0.84 0.85 0.85 0.86 0.86 0.88 0.88 0.89 0.89 0.9 0.9 0.91 0.91 0.93 0.93 0.94 0.94 0.95 0.95 0.96 0.96 0.98 0.98 0.98 0.98 0.99 0.99 0.99 0.9…	0.994314
					Dioscoreales	[0.00000000e+00 0.00000000e+00 0.00000000e+00 6.29370629e-04 6.29370629e-04 2.16783217e-03 2.16783217e-03 6.01398601e-03 6.01398601e-03 6.71328671e-03 6.71328671e-03 9.16083916e-03 9.30069930e-03 1.95804196e-02 1.95804196e-02 7.16083916e-02 7.17482517e-02 7.50349650e-02 7.51748252e-02 1.14055944e-01 1.14055944e-01 1.33846154e-01 1.33986014e-01 1.53636364e-01 1.53776224e-01 1.57062937e-01 1.572027…	[0. 0.01 0.94 0.94 0.95 0.95 0.96 0.96 0.97 0.97 0.98 0.98 0.98 0.98 0.99 0.99 0.99 0.99 0.99 0.99 1. 1. 1. 1. 1. 1. 1. 1. 1. 1. 1. 1. 1. 1. 1. 1. 1. 1. 1. 1. 1. 1. 1. 1. 1. 1. 1. 1. 1. 1. 1. 1. 1. 1. 1. 1. 1. 1. 1. 1. 1. 1. 1. 1. 1. 1. 1. 1. 1. 1. 1. 1. 1. 1. 1. 1. 1. 1. 1. 1. 1. 1. 1. 1. 1. 1. 1. 1. 1. 1. 1. 1. 1. 1. 1. 1. 1. 1. 1. 1. 1. 1. 1. 1. 1. 1. 1. 1. 1. 1. 1. 1. 1. 1. 1. 1. 1. 1. 1. 1. …	0.998508		Campanulaceae	[0.00000000e+00 0.00000000e+00 0.00000000e+00 0.00000000e+00 0.00000000e+00 7.63358779e-05 7.63358779e-05 3.05343511e-04 3.05343511e-04 1.90839695e-03 1.90839695e-03 2.59541985e-03 2.59541985e-03 2.49618321e-02 2.49618321e-02 7.52671756e-02 7.54198473e-02 7.94656489e-02 7.96183206e-02 1.04351145e-01 1.04503817e-01 1.07251908e-01 1.07404580e-01 1.36335878e-01 1.36488550e-01 1.45954198e-01 1.461068…	[0. 0.01 0.16 0.18 0.94 0.94 0.96 0.96 0.97 0.97 0.98 0.98 0.99 0.99 1. 1. 1. 1. 1. 1. 1. 1. 1. 1. 1. 1. 1. 1. 1. 1. 1. 1. 1. 1. 1. 1. 1. 1. 1. 1. 1. 1. 1. 1. 1. 1. 1. 1. 1. 1. 1. 1. 1. 1. 1. 1. 1. 1. 1. 1. 1. 1. 1. 1. 1. 1. 1. 1. 1. 1. 1. 1. 1. 1. 1. 1. 1. 1. 1. 1. 1. 1. 1. 1. 1. 1. 1. 1. 1. 1. 1. 1. 1. 1. 1. 1. 1. 1. 1. 1. 1. 1. 1. 1. 1. 1. 1. 1. 1. 1. 1. 1. 1. 1. 1. 1. 1. 1. 1. 1. 1. 1. 1. 1. …	0.999701		Atriplex	[0. 0. 0. 0. 0. 0. 0. 0.00383838 0.00383838 0.03616162 0.03636364 0.09717172 0.09737374 0.10646465 0.10666667 0.12525253 0.12525253 0.14808081 0.14828283 0.15939394 0.15959596 0.16373737 0.16393939 0.19171717 0.19191919 0.20525253 0.20545455 0.23525253 0.23545455 0.23767677 0.23787879 0.25454545 0.25474747 0.26606061 0.26626263 0.29232323 0.29252525 0.38151515 0.38171717 0.39383838 0.3940404 0.40…	[0. 0.01 0.37 0.39 0.5 0.52 0.98 0.98 0.99 0.99 0.99 0.99 0.99 0.99 0.99 0.99 1. 1. 1. 1. 1. 1. 1. 1. 1. 1. 1. 1. 1. 1. 1. 1. 1. 1. 1. 1. 1. 1. 1. 1. 1. 1. 1. 1. 1. 1. 1. 1. 1. 1. 1. 1. 1. 1. 1. 1. 1. 1. 1. 1. 1. 1. 1. 1. 1. 1. 1. 1. 1. 1. 1. 1. 1. 1. 1. 1. 1. 1. 1. 1. 1. 1. 1. 1. 1. 1. 1. 1. 1. 1. 1. 1. 1. 1. ]	0.998709
[truncated: 92 more rows]

## Sheet: Figure 5d&S5a
class					order					family					genus
	recall	precision	average_precision			recall	precision	average_precision			recall	precision	average_precision			recall	precision	average_precision
Jungermanniopsida	[1. 1. 1. ... 0.005 0.0025 0. ]	[0.02721088 0.02721274 0.02721459 ... 1. 1. 1. ]	0.910954		Alismatales	[1. 1. 1. ... 0.01 0.005 0. ]	[0.01388889 0.01388985 0.01389082 ... 1. 1. 1. ]	0.994648		Adoxaceae	[1. 1. 1. ... 0.02 0.01 0. ]	[0.00757576 0.00757633 0.00757691 ... 1. 1. 1. ]	0.958472		Acacia	[1. 1. 1. ... 0.02 0.01 0. ]	[0.01 0.010001 0.010002 ... 1. 1. 1. ]	0.522215
Magnoliopsida	[1.00000000e+00 1.00000000e+00 1.00000000e+00 ... 1.48148148e-04 7.40740741e-05 0.00000000e+00]	[0.91836735 0.91842983 0.91849231 ... 1. 1. 1. ]	0.999575		Apiales	[1. 1. 1. ... 0.01 0.005 0. ]	[0.01388889 0.01388985 0.01389082 ... 1. 1. 1. ]	0.957633		Amaryllidaceae	[1. 1. 1. ... 0.02 0.01 0. ]	[0.00757576 0.00757633 0.00757691 ... 1. 1. 1. ]	0.994964		Acer	[1. 1. 1. ... 0.02 0.01 0. ]	[0.01 0.010001 0.010002 ... 1. 1. 1. ]	0.941789
[truncated: 100 more rows]

## Sheet: Figure 7a&Table S3
	AUROC					AUPR
marker	class	order	family	genus	average	class	order	family	genus	average
atpB	97.6906	86.2768	86.0333	93.7592	90.94	99.8071	97.7943	96.9723	96.4659	97.7599
matK	98.5918	85.6332	92.2553	88.8457	91.3315	99.9843	99.6581	99.2806	92.4191	97.8355
[truncated: 7 more rows]

## Sheet: Figure 7b&Table S4
		class			order			family			genus
[truncated: 28 more rows]

## Sheet: Figure 7c
marker	metric1	metric2	coeff	pvalue
[truncated: 27 more rows]

[truncated: 5 more sheets: Figure 8c, Figure S4b, Figure S4c, Figure S5b, Figure S5c]
